# Supplementary material
Source: publisher figshare collection journal article supplement (https://gsajournals.figshare.com/articles/dataset/_/6967337)
Supplement: Supplementary file 1 [file 1]

**Ensembl v87**

**Ensembl v88**

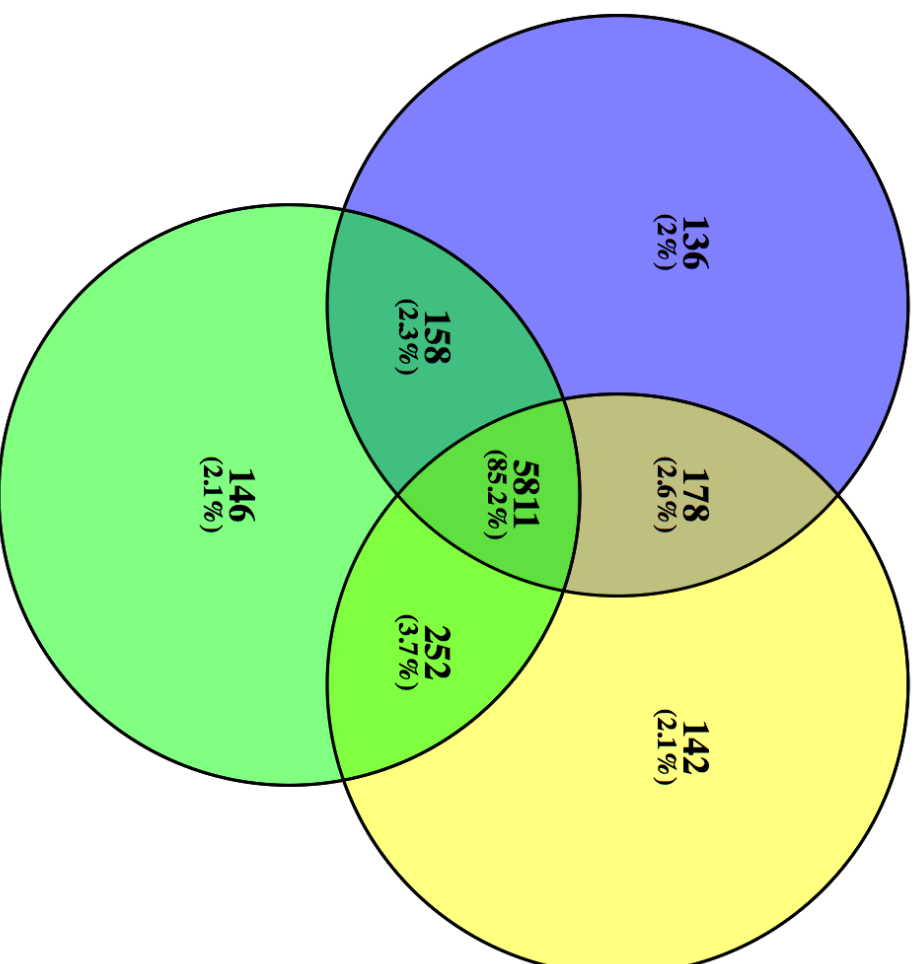

**Ensembl v89**

**Supplemental Figure S1: changes in gene content in Ensembl Compara v87, v88 and v89.**

The Ensembl Compara database was updated three times while we were compiling OL2. In this time-span we noticed that the landscape of worm genes with predicted human orthologs changed after each update, so that each version had ~2% of genes unique to it, while another ~2-4% of genes were found in only two of the three versions (see also Materials and Methods).
