# Supplementary material
Source: publisher figshare collection journal article supplement (https://gsajournals.figshare.com/articles/dataset/_/6967337)
Supplement: Supplementary file 1 [file 1]

## Sheet: Ensembl Compara 87-89
CE_WB_CURRENT	HS_ENSG	CE_WB_OLD	CE_WB_COMMENT
WBGene00000001	ENSG00000105647	WBGene00000001
WBGene00000001	ENSG00000117461	WBGene00000001
WBGene00000001	ENSG00000145675	WBGene00000001
WBGene00000001	ENSG00000268173	WBGene00000001
WBGene00000001	ENSG00000278139	WBGene00000001
WBGene00000002	ENSG00000092068	WBGene00000002
WBGene00000002	ENSG00000103064	WBGene00000002
WBGene00000002	ENSG00000103257	WBGene00000002
WBGene00000002	ENSG00000130876	WBGene00000002
WBGene00000002	ENSG00000155465	WBGene00000002
WBGene00000003	ENSG00000092068	WBGene00000003
WBGene00000003	ENSG00000103064	WBGene00000003
WBGene00000003	ENSG00000103257	WBGene00000003
WBGene00000003	ENSG00000130876	WBGene00000003
WBGene00000003	ENSG00000155465	WBGene00000003
WBGene00000004	ENSG00000092068	WBGene00000004
WBGene00000004	ENSG00000103064	WBGene00000004
WBGene00000004	ENSG00000103257	WBGene00000004
WBGene00000004	ENSG00000130876	WBGene00000004
WBGene00000004	ENSG00000155465	WBGene00000004
WBGene00000018	ENSG00000097007	WBGene00000018
WBGene00000018	ENSG00000143322	WBGene00000018
WBGene00000020	ENSG00000064687	WBGene00000020
WBGene00000020	ENSG00000107331	WBGene00000020
WBGene00000020	ENSG00000141338	WBGene00000020
WBGene00000020	ENSG00000144452	WBGene00000020
WBGene00000020	ENSG00000154258	WBGene00000020
WBGene00000020	ENSG00000154262	WBGene00000020
WBGene00000020	ENSG00000154263	WBGene00000020
WBGene00000020	ENSG00000154265	WBGene00000020
WBGene00000020	ENSG00000165029	WBGene00000020
WBGene00000020	ENSG00000179869	WBGene00000020
WBGene00000020	ENSG00000198691	WBGene00000020
WBGene00000022	ENSG00000141338	WBGene00000022
WBGene00000022	ENSG00000154258	WBGene00000022
WBGene00000022	ENSG00000154262	WBGene00000022
WBGene00000022	ENSG00000154263	WBGene00000022
WBGene00000022	ENSG00000154265	WBGene00000022
WBGene00000022	ENSG00000167972	WBGene00000022
WBGene00000023	ENSG00000141338	WBGene00000023
WBGene00000023	ENSG00000154258	WBGene00000023
WBGene00000023	ENSG00000154262	WBGene00000023
WBGene00000023	ENSG00000154263	WBGene00000023
WBGene00000023	ENSG00000154265	WBGene00000023
WBGene00000035	ENSG00000087085	WBGene00000035
WBGene00000035	ENSG00000114200	WBGene00000035
WBGene00000036	ENSG00000087085	WBGene00000036
WBGene00000036	ENSG00000114200	WBGene00000036
WBGene00000037	ENSG00000087085	WBGene00000037
WBGene00000037	ENSG00000114200	WBGene00000037
WBGene00000038	ENSG00000087085	WBGene00000038
WBGene00000038	ENSG00000114200	WBGene00000038
WBGene00000039	ENSG00000130234	WBGene00000039
WBGene00000039	ENSG00000147003	WBGene00000039
WBGene00000039	ENSG00000159640	WBGene00000039
WBGene00000039	ENSG00000264813	WBGene00000039
WBGene00000040	ENSG00000122729	WBGene00000040
WBGene00000040	ENSG00000136381	WBGene00000040
WBGene00000041	ENSG00000100412	WBGene00000041
WBGene00000042	ENSG00000080644	WBGene00000042
WBGene00000042	ENSG00000101204	WBGene00000042
WBGene00000042	ENSG00000108556	WBGene00000042
WBGene00000042	ENSG00000117971	WBGene00000042
WBGene00000042	ENSG00000120903	WBGene00000042
WBGene00000042	ENSG00000135902	WBGene00000042
WBGene00000042	ENSG00000138435	WBGene00000042
WBGene00000042	ENSG00000147432	WBGene00000042
WBGene00000042	ENSG00000147434	WBGene00000042
WBGene00000042	ENSG00000160716	WBGene00000042
WBGene00000042	ENSG00000169684	WBGene00000042
WBGene00000042	ENSG00000170175	WBGene00000042
WBGene00000042	ENSG00000196811	WBGene00000042
WBGene00000043	ENSG00000080644	WBGene00000043
WBGene00000043	ENSG00000101204	WBGene00000043
WBGene00000043	ENSG00000108556	WBGene00000043
WBGene00000043	ENSG00000117971	WBGene00000043
WBGene00000043	ENSG00000120903	WBGene00000043
WBGene00000043	ENSG00000135902	WBGene00000043
WBGene00000043	ENSG00000138435	WBGene00000043
WBGene00000043	ENSG00000147432	WBGene00000043
WBGene00000043	ENSG00000147434	WBGene00000043
WBGene00000043	ENSG00000160716	WBGene00000043
WBGene00000043	ENSG00000169684	WBGene00000043
WBGene00000043	ENSG00000170175	WBGene00000043
WBGene00000043	ENSG00000196811	WBGene00000043
WBGene00000044	ENSG00000149305	WBGene00000044
WBGene00000044	ENSG00000166736	WBGene00000044
WBGene00000044	ENSG00000178084	WBGene00000044
WBGene00000044	ENSG00000186038	WBGene00000044
WBGene00000044	ENSG00000186090	WBGene00000044
WBGene00000044	ENSG00000186919	WBGene00000044
WBGene00000045	ENSG00000080644	WBGene00000045
WBGene00000045	ENSG00000101204	WBGene00000045
WBGene00000045	ENSG00000108556	WBGene00000045
WBGene00000045	ENSG00000117971	WBGene00000045
WBGene00000045	ENSG00000120903	WBGene00000045
WBGene00000045	ENSG00000135902	WBGene00000045
WBGene00000045	ENSG00000138435	WBGene00000045
WBGene00000045	ENSG00000147432	WBGene00000045
WBGene00000045	ENSG00000147434	WBGene00000045
WBGene00000045	ENSG00000160716	WBGene00000045
WBGene00000045	ENSG00000169684	WBGene00000045
WBGene00000045	ENSG00000170175	WBGene00000045
WBGene00000045	ENSG00000196811	WBGene00000045
WBGene00000046	ENSG00000166664	WBGene00000046
WBGene00000046	ENSG00000175344	WBGene00000046
WBGene00000047	ENSG00000080644	WBGene00000047
WBGene00000047	ENSG00000101204	WBGene00000047
WBGene00000047	ENSG00000108556	WBGene00000047
WBGene00000047	ENSG00000117971	WBGene00000047
WBGene00000047	ENSG00000120903	WBGene00000047
WBGene00000047	ENSG00000135902	WBGene00000047
WBGene00000047	ENSG00000138435	WBGene00000047
WBGene00000047	ENSG00000147432	WBGene00000047
WBGene00000047	ENSG00000147434	WBGene00000047
WBGene00000047	ENSG00000160716	WBGene00000047
WBGene00000047	ENSG00000169684	WBGene00000047
WBGene00000047	ENSG00000170175	WBGene00000047
WBGene00000047	ENSG00000196811	WBGene00000047
WBGene00000048	ENSG00000166664	WBGene00000048
WBGene00000048	ENSG00000175344	WBGene00000048
WBGene00000049	ENSG00000166664	WBGene00000049
WBGene00000049	ENSG00000175344	WBGene00000049
WBGene00000050	ENSG00000166664	WBGene00000050
WBGene00000050	ENSG00000175344	WBGene00000050
WBGene00000051	ENSG00000080644	WBGene00000051
WBGene00000051	ENSG00000101204	WBGene00000051
WBGene00000051	ENSG00000108556	WBGene00000051
WBGene00000051	ENSG00000117971	WBGene00000051
WBGene00000051	ENSG00000120903	WBGene00000051
WBGene00000051	ENSG00000135902	WBGene00000051
WBGene00000051	ENSG00000138435	WBGene00000051
WBGene00000051	ENSG00000147432	WBGene00000051
WBGene00000051	ENSG00000147434	WBGene00000051
WBGene00000051	ENSG00000160716	WBGene00000051
WBGene00000051	ENSG00000169684	WBGene00000051
WBGene00000051	ENSG00000170175	WBGene00000051
WBGene00000051	ENSG00000196811	WBGene00000051
WBGene00000053	ENSG00000166664	WBGene00000053
WBGene00000053	ENSG00000175344	WBGene00000053
WBGene00000054	ENSG00000166664	WBGene00000054
WBGene00000054	ENSG00000175344	WBGene00000054
WBGene00000055	ENSG00000166664	WBGene00000055
WBGene00000055	ENSG00000175344	WBGene00000055
WBGene00000056	ENSG00000149305	WBGene00000056
WBGene00000056	ENSG00000166736	WBGene00000056
WBGene00000056	ENSG00000178084	WBGene00000056
WBGene00000056	ENSG00000186038	WBGene00000056
WBGene00000056	ENSG00000186090	WBGene00000056
WBGene00000056	ENSG00000186919	WBGene00000056
WBGene00000057	ENSG00000149305	WBGene00000057
WBGene00000057	ENSG00000166736	WBGene00000057
WBGene00000057	ENSG00000178084	WBGene00000057
WBGene00000057	ENSG00000186038	WBGene00000057
WBGene00000057	ENSG00000186090	WBGene00000057
WBGene00000057	ENSG00000186919	WBGene00000057
WBGene00000058	ENSG00000166664	WBGene00000058
WBGene00000058	ENSG00000175344	WBGene00000058
WBGene00000059	ENSG00000149305	WBGene00000059
WBGene00000059	ENSG00000166736	WBGene00000059
WBGene00000059	ENSG00000178084	WBGene00000059
WBGene00000059	ENSG00000186038	WBGene00000059
WBGene00000059	ENSG00000186090	WBGene00000059
WBGene00000059	ENSG00000186919	WBGene00000059
WBGene00000060	ENSG00000129749	WBGene00000060
WBGene00000060	ENSG00000174343	WBGene00000060
WBGene00000061	ENSG00000149305	WBGene00000061
WBGene00000061	ENSG00000166736	WBGene00000061
WBGene00000061	ENSG00000178084	WBGene00000061
WBGene00000061	ENSG00000186038	WBGene00000061
WBGene00000061	ENSG00000186090	WBGene00000061
WBGene00000061	ENSG00000186919	WBGene00000061
WBGene00000062	ENSG00000149305	WBGene00000062
WBGene00000062	ENSG00000166736	WBGene00000062
WBGene00000062	ENSG00000178084	WBGene00000062
WBGene00000062	ENSG00000186038	WBGene00000062
WBGene00000062	ENSG00000186090	WBGene00000062
WBGene00000062	ENSG00000186919	WBGene00000062
WBGene00000063	ENSG00000075624	WBGene00000063
WBGene00000063	ENSG00000123165	WBGene00000063
WBGene00000063	ENSG00000148156	WBGene00000063
WBGene00000063	ENSG00000169067	WBGene00000063
WBGene00000063	ENSG00000169717	WBGene00000063
WBGene00000063	ENSG00000181786	WBGene00000063
WBGene00000063	ENSG00000184009	WBGene00000063
WBGene00000063	ENSG00000184378	WBGene00000063
WBGene00000063	ENSG00000187003	WBGene00000063
WBGene00000064	ENSG00000075624	WBGene00000064
WBGene00000064	ENSG00000123165	WBGene00000064
WBGene00000064	ENSG00000148156	WBGene00000064
WBGene00000064	ENSG00000169067	WBGene00000064
WBGene00000064	ENSG00000169717	WBGene00000064
WBGene00000064	ENSG00000181786	WBGene00000064
WBGene00000064	ENSG00000184009	WBGene00000064
WBGene00000064	ENSG00000184378	WBGene00000064
WBGene00000064	ENSG00000187003	WBGene00000064
WBGene00000065	ENSG00000075624	WBGene00000065
WBGene00000065	ENSG00000123165	WBGene00000065
WBGene00000065	ENSG00000148156	WBGene00000065
WBGene00000065	ENSG00000169067	WBGene00000065
WBGene00000065	ENSG00000169717	WBGene00000065
WBGene00000065	ENSG00000181786	WBGene00000065
WBGene00000065	ENSG00000184009	WBGene00000065
WBGene00000065	ENSG00000184378	WBGene00000065
WBGene00000065	ENSG00000187003	WBGene00000065
WBGene00000066	ENSG00000075624	WBGene00000066
WBGene00000066	ENSG00000123165	WBGene00000066
WBGene00000066	ENSG00000148156	WBGene00000066
WBGene00000066	ENSG00000169067	WBGene00000066
WBGene00000066	ENSG00000169717	WBGene00000066
WBGene00000066	ENSG00000181786	WBGene00000066
WBGene00000066	ENSG00000184009	WBGene00000066
WBGene00000066	ENSG00000184378	WBGene00000066
WBGene00000066	ENSG00000187003	WBGene00000066
WBGene00000067	ENSG00000107796	WBGene00000067
WBGene00000067	ENSG00000143632	WBGene00000067
WBGene00000067	ENSG00000159251	WBGene00000067
WBGene00000067	ENSG00000163017	WBGene00000067
WBGene00000068	ENSG00000162104	WBGene00000068
WBGene00000069	ENSG00000078295	WBGene00000069
WBGene00000069	ENSG00000121281	WBGene00000069
WBGene00000069	ENSG00000129467	WBGene00000069
WBGene00000070	ENSG00000078295	WBGene00000070
WBGene00000070	ENSG00000164742	WBGene00000070
WBGene00000072	ENSG00000075340	WBGene00000072
WBGene00000072	ENSG00000087274	WBGene00000072
WBGene00000072	ENSG00000148700	WBGene00000072
WBGene00000073	ENSG00000075340	WBGene00000073
WBGene00000073	ENSG00000087274	WBGene00000073
WBGene00000073	ENSG00000148700	WBGene00000073
WBGene00000074	ENSG00000042980	WBGene00000074
WBGene00000074	ENSG00000069206	WBGene00000074
WBGene00000074	ENSG00000104755	WBGene00000074
WBGene00000074	ENSG00000134007	WBGene00000074
WBGene00000074	ENSG00000134249	WBGene00000074
WBGene00000074	ENSG00000135074	WBGene00000074
WBGene00000074	ENSG00000139985	WBGene00000074
WBGene00000074	ENSG00000143537	WBGene00000074
WBGene00000074	ENSG00000148848	WBGene00000074
WBGene00000074	ENSG00000149451	WBGene00000074
WBGene00000074	ENSG00000151651	WBGene00000074
WBGene00000074	ENSG00000168594	WBGene00000074
WBGene00000074	ENSG00000168615	WBGene00000074
WBGene00000074	ENSG00000168619	WBGene00000074
WBGene00000074	ENSG00000197140	WBGene00000074
WBGene00000075	ENSG00000151694	WBGene00000075
WBGene00000079	ENSG00000140955	WBGene00000079
WBGene00000079	ENSG00000164113	WBGene00000079
WBGene00000080	ENSG00000160710	WBGene00000080
WBGene00000081	ENSG00000018510	WBGene00000081
WBGene00000082	ENSG00000087116	WBGene00000082
WBGene00000082	ENSG00000138316	WBGene00000082
WBGene00000082	ENSG00000156140	WBGene00000082
WBGene00000082	ENSG00000160323	WBGene00000082
WBGene00000083	ENSG00000087116	WBGene00000083
WBGene00000083	ENSG00000138316	WBGene00000083
WBGene00000083	ENSG00000156140	WBGene00000083
WBGene00000083	ENSG00000160323	WBGene00000083
WBGene00000086	ENSG00000110514	WBGene00000086
WBGene00000089	ENSG00000041353	WBGene00000089
WBGene00000089	ENSG00000069974	WBGene00000089
WBGene00000090	ENSG00000105851	WBGene00000090
WBGene00000092	ENSG00000121957	WBGene00000092
WBGene00000092	ENSG00000160360	WBGene00000092
WBGene00000095	ENSG00000143437	WBGene00000095
WBGene00000095	ENSG00000172379	WBGene00000095
WBGene00000096	ENSG00000063438	WBGene00000096
WBGene00000096	ENSG00000106546	WBGene00000096
WBGene00000096	ENSG00000283321	WBGene00000096
WBGene00000097	ENSG00000158552	WBGene00000097
WBGene00000097	ENSG00000178381	WBGene00000097
WBGene00000098	ENSG00000087586	WBGene00000098
WBGene00000098	ENSG00000105146	WBGene00000098
WBGene00000098	ENSG00000163482	WBGene00000098
WBGene00000098	ENSG00000178999	WBGene00000098
WBGene00000099	ENSG00000087586	WBGene00000099
WBGene00000099	ENSG00000105146	WBGene00000099
WBGene00000099	ENSG00000178999	WBGene00000099
WBGene00000100	ENSG00000232434	WBGene00000100
WBGene00000101	ENSG00000039319	WBGene00000101
WBGene00000101	ENSG00000100711	WBGene00000101
WBGene00000101	ENSG00000157077	WBGene00000101
WBGene00000102	ENSG00000105221	WBGene00000102
WBGene00000102	ENSG00000117020	WBGene00000102
WBGene00000102	ENSG00000142208	WBGene00000102
WBGene00000103	ENSG00000105221	WBGene00000103
WBGene00000103	ENSG00000117020	WBGene00000103
WBGene00000103	ENSG00000142208	WBGene00000103
WBGene00000105	ENSG00000092847	WBGene00000105
WBGene00000105	ENSG00000123908	WBGene00000105
WBGene00000105	ENSG00000126070	WBGene00000105
WBGene00000105	ENSG00000134698	WBGene00000105
WBGene00000106	ENSG00000092847	WBGene00000106
WBGene00000106	ENSG00000123908	WBGene00000106
WBGene00000106	ENSG00000126070	WBGene00000106
WBGene00000106	ENSG00000134698	WBGene00000106
WBGene00000107	ENSG00000111275	WBGene00000107
WBGene00000107	ENSG00000128918	WBGene00000107
WBGene00000107	ENSG00000137124	WBGene00000107
WBGene00000107	ENSG00000165092	WBGene00000107
WBGene00000107	ENSG00000184254	WBGene00000107
WBGene00000107	ENSG00000257767	WBGene00000107
WBGene00000108	ENSG00000111275	WBGene00000108
WBGene00000108	ENSG00000128918	WBGene00000108
WBGene00000108	ENSG00000137124	WBGene00000108
WBGene00000108	ENSG00000165092	WBGene00000108
WBGene00000108	ENSG00000184254	WBGene00000108
WBGene00000108	ENSG00000257767	WBGene00000108
WBGene00000109	ENSG00000136010	WBGene00000109
WBGene00000109	ENSG00000144908	WBGene00000109
WBGene00000110	ENSG00000006534	WBGene00000110
WBGene00000110	ENSG00000072210	WBGene00000110
WBGene00000110	ENSG00000108602	WBGene00000110
WBGene00000110	ENSG00000132746	WBGene00000110
WBGene00000111	ENSG00000006534	WBGene00000111
WBGene00000111	ENSG00000072210	WBGene00000111
WBGene00000111	ENSG00000108602	WBGene00000111
WBGene00000111	ENSG00000132746	WBGene00000111
WBGene00000112	ENSG00000159423	WBGene00000112
WBGene00000113	ENSG00000112294	WBGene00000113
WBGene00000114	ENSG00000119711	WBGene00000114
WBGene00000115	ENSG00000164904	WBGene00000115
WBGene00000116	ENSG00000118514	WBGene00000116
WBGene00000117	ENSG00000143149	WBGene00000117
WBGene00000118	ENSG00000143149	WBGene00000118
WBGene00000123	ENSG00000181222	WBGene00000123
WBGene00000137	ENSG00000165097	WBGene00000137
WBGene00000138	ENSG00000069535	WBGene00000138
WBGene00000138	ENSG00000189221	WBGene00000138
WBGene00000139	ENSG00000088826	WBGene00000139
WBGene00000139	ENSG00000148832	WBGene00000139
WBGene00000140	ENSG00000054654	WBGene00000140
WBGene00000140	ENSG00000131018	WBGene00000140
WBGene00000140	ENSG00000137877	WBGene00000140
WBGene00000140	ENSG00000165959	WBGene00000140
WBGene00000142	ENSG00000142230	WBGene00000142
WBGene00000143	ENSG00000176248	WBGene00000143
WBGene00000144	ENSG00000164162	WBGene00000144
WBGene00000145	ENSG00000141552	WBGene00000145
WBGene00000146	ENSG00000088808	WBGene00000146
WBGene00000146	ENSG00000104881	WBGene00000146
WBGene00000146	ENSG00000143514	WBGene00000146
WBGene00000147	ENSG00000117362	WBGene00000147
WBGene00000147	ENSG00000138613	WBGene00000147
WBGene00000148	ENSG00000162736	WBGene00000148
WBGene00000149	ENSG00000084234	WBGene00000149
WBGene00000149	ENSG00000105290	WBGene00000149
WBGene00000149	ENSG00000142192	WBGene00000149
WBGene00000150	ENSG00000072958	WBGene00000150
WBGene00000150	ENSG00000129354	WBGene00000150
WBGene00000155	ENSG00000108039	WBGene00000155
WBGene00000155	ENSG00000122121	WBGene00000155
WBGene00000156	ENSG00000115266	WBGene00000156
WBGene00000156	ENSG00000134982	WBGene00000156
WBGene00000156	ENSG00000258864	WBGene00000156
WBGene00000157	ENSG00000042753	WBGene00000157
WBGene00000158	ENSG00000081014	WBGene00000158
WBGene00000158	ENSG00000166747	WBGene00000158
WBGene00000158	ENSG00000213983	WBGene00000158
WBGene00000159	ENSG00000106367	WBGene00000159
WBGene00000159	ENSG00000152056	WBGene00000159
WBGene00000159	ENSG00000182287	WBGene00000159
WBGene00000160	ENSG00000006125	WBGene00000160
WBGene00000160	ENSG00000100280	WBGene00000160
WBGene00000161	ENSG00000183020	WBGene00000161
WBGene00000161	ENSG00000196961	WBGene00000161
WBGene00000162	ENSG00000065000	WBGene00000162
WBGene00000163	ENSG00000103723	WBGene00000163
WBGene00000163	ENSG00000132842	WBGene00000163
WBGene00000164	ENSG00000070718	WBGene00000164
WBGene00000164	ENSG00000185009	WBGene00000164
WBGene00000165	ENSG00000157823	WBGene00000165
WBGene00000166	ENSG00000100083	WBGene00000166
WBGene00000166	ENSG00000103365	WBGene00000166
WBGene00000166	ENSG00000125447	WBGene00000166
WBGene00000169	ENSG00000103569	WBGene00000169
WBGene00000169	ENSG00000143595	WBGene00000169
WBGene00000169	ENSG00000165269	WBGene00000169
WBGene00000169	ENSG00000165272	WBGene00000169
WBGene00000169	ENSG00000259916	WBGene00000169
WBGene00000169	ENSG00000277737	WBGene00000169
WBGene00000170	ENSG00000103569	WBGene00000170
WBGene00000170	ENSG00000143595	WBGene00000170
WBGene00000170	ENSG00000165269	WBGene00000170
WBGene00000170	ENSG00000165272	WBGene00000170
WBGene00000170	ENSG00000259916	WBGene00000170
WBGene00000170	ENSG00000277737	WBGene00000170
WBGene00000171	ENSG00000103569	WBGene00000171
WBGene00000171	ENSG00000143595	WBGene00000171
WBGene00000171	ENSG00000165269	WBGene00000171
WBGene00000171	ENSG00000165272	WBGene00000171
WBGene00000171	ENSG00000259916	WBGene00000171
WBGene00000171	ENSG00000277737	WBGene00000171
WBGene00000172	ENSG00000103375	WBGene00000172
WBGene00000173	ENSG00000103375	WBGene00000173
WBGene00000174	ENSG00000103375	WBGene00000174
WBGene00000175	ENSG00000103569	WBGene00000175
WBGene00000175	ENSG00000143595	WBGene00000175
WBGene00000175	ENSG00000165269	WBGene00000175
WBGene00000175	ENSG00000165272	WBGene00000175
WBGene00000175	ENSG00000259916	WBGene00000175
WBGene00000175	ENSG00000277737	WBGene00000175
WBGene00000176	ENSG00000103569	WBGene00000176
WBGene00000176	ENSG00000143595	WBGene00000176
WBGene00000176	ENSG00000165269	WBGene00000176
WBGene00000176	ENSG00000165272	WBGene00000176
WBGene00000176	ENSG00000259916	WBGene00000176
WBGene00000176	ENSG00000277737	WBGene00000176
WBGene00000180	ENSG00000113595	WBGene00000180
WBGene00000181	ENSG00000072506	WBGene00000181
WBGene00000182	ENSG00000004059	WBGene00000182
WBGene00000182	ENSG00000113595	WBGene00000182
WBGene00000182	ENSG00000134287	WBGene00000182
WBGene00000182	ENSG00000143761	WBGene00000182
WBGene00000182	ENSG00000168374	WBGene00000182
WBGene00000182	ENSG00000272822	WBGene00000182
WBGene00000183	ENSG00000004059	WBGene00000183
WBGene00000183	ENSG00000113595	WBGene00000183
WBGene00000183	ENSG00000134287	WBGene00000183
WBGene00000183	ENSG00000143761	WBGene00000183
WBGene00000183	ENSG00000168374	WBGene00000183
WBGene00000183	ENSG00000272822	WBGene00000183
WBGene00000184	ENSG00000165527	WBGene00000184
WBGene00000187	ENSG00000120805	WBGene00000187
WBGene00000188	ENSG00000138175	WBGene00000188
WBGene00000189	ENSG00000141748	WBGene00000189
WBGene00000189	ENSG00000162980	WBGene00000189
WBGene00000189	ENSG00000165997	WBGene00000189
WBGene00000189	ENSG00000255863	WBGene00000189
WBGene00000190	ENSG00000122644	WBGene00000190
WBGene00000190	ENSG00000152213	WBGene00000190
WBGene00000190	ENSG00000175414	WBGene00000190
WBGene00000190	ENSG00000175906	WBGene00000190
WBGene00000190	ENSG00000179674	WBGene00000190
WBGene00000190	ENSG00000188042	WBGene00000190
WBGene00000190	ENSG00000196503	WBGene00000190
WBGene00000192	ENSG00000134108	WBGene00000192
WBGene00000192	ENSG00000143862	WBGene00000192
WBGene00000193	ENSG00000113966	WBGene00000193
WBGene00000195	ENSG00000120500	WBGene00000195
WBGene00000195	ENSG00000130561	WBGene00000195
WBGene00000195	ENSG00000137486	WBGene00000195
WBGene00000195	ENSG00000141480	WBGene00000195
WBGene00000196	ENSG00000124608	WBGene00000196
WBGene00000197	ENSG00000090861	WBGene00000197
WBGene00000198	ENSG00000099797	WBGene00000198
WBGene00000198	ENSG00000205678	WBGene00000198
WBGene00000199	ENSG00000106526	WBGene00000199
WBGene00000199	ENSG00000115091	WBGene00000199
WBGene00000199	ENSG00000133627	WBGene00000199
WBGene00000200	ENSG00000138071	WBGene00000200
WBGene00000201	ENSG00000130429	WBGene00000201
WBGene00000201	ENSG00000241685	WBGene00000201
WBGene00000201	ENSG00000284292	WBGene00000201
WBGene00000202	ENSG00000223496	WBGene00000202
WBGene00000203	ENSG00000111229	WBGene00000203
WBGene00000204	ENSG00000241553	WBGene00000204
WBGene00000205	ENSG00000136950	WBGene00000205
WBGene00000205	ENSG00000162704	WBGene00000205
WBGene00000206	ENSG00000116459	WBGene00000206
WBGene00000207	ENSG00000116459	WBGene00000207
WBGene00000208	ENSG00000103671	WBGene00000208
WBGene00000211	ENSG00000166311	WBGene00000211
WBGene00000212	ENSG00000166311	WBGene00000212
WBGene00000213	ENSG00000166311	WBGene00000213
WBGene00000214	ENSG00000096088	WBGene00000214
WBGene00000214	ENSG00000182240	WBGene00000214
WBGene00000214	ENSG00000186318	WBGene00000214
WBGene00000214	ENSG00000196188	WBGene00000214
WBGene00000214	ENSG00000229183	WBGene00000214
WBGene00000214	ENSG00000229859	WBGene00000214
WBGene00000214	ENSG00000256713	WBGene00000214
WBGene00000215	ENSG00000096088	WBGene00000215
WBGene00000215	ENSG00000182240	WBGene00000215
WBGene00000215	ENSG00000186318	WBGene00000215
WBGene00000215	ENSG00000196188	WBGene00000215
WBGene00000215	ENSG00000229183	WBGene00000215
WBGene00000215	ENSG00000229859	WBGene00000215
WBGene00000215	ENSG00000256713	WBGene00000215
WBGene00000216	ENSG00000117984	WBGene00000216
WBGene00000216	ENSG00000131400	WBGene00000216
WBGene00000216	ENSG00000143839	WBGene00000216
WBGene00000216	ENSG00000182240	WBGene00000216
WBGene00000216	ENSG00000186318	WBGene00000216
WBGene00000216	ENSG00000250644	WBGene00000216
WBGene00000217	ENSG00000117984	WBGene00000217
WBGene00000217	ENSG00000131400	WBGene00000217
WBGene00000217	ENSG00000143839	WBGene00000217
WBGene00000217	ENSG00000182240	WBGene00000217
WBGene00000217	ENSG00000186318	WBGene00000217
WBGene00000217	ENSG00000250644	WBGene00000217
WBGene00000218	ENSG00000096088	WBGene00000218
WBGene00000218	ENSG00000182240	WBGene00000218
WBGene00000218	ENSG00000186318	WBGene00000218
WBGene00000218	ENSG00000196188	WBGene00000218
WBGene00000218	ENSG00000229183	WBGene00000218
WBGene00000218	ENSG00000229859	WBGene00000218
WBGene00000218	ENSG00000256713	WBGene00000218
WBGene00000219	ENSG00000096088	WBGene00000219
WBGene00000219	ENSG00000182240	WBGene00000219
WBGene00000219	ENSG00000186318	WBGene00000219
WBGene00000219	ENSG00000196188	WBGene00000219
WBGene00000219	ENSG00000229183	WBGene00000219
WBGene00000219	ENSG00000229859	WBGene00000219
WBGene00000219	ENSG00000256713	WBGene00000219
WBGene00000220	ENSG00000165030	WBGene00000220
WBGene00000222	ENSG00000118217	WBGene00000222
WBGene00000222	ENSG00000213676	WBGene00000222
WBGene00000224	ENSG00000168003	WBGene00000224
WBGene00000225	ENSG00000168003	WBGene00000225
WBGene00000226	ENSG00000175054	WBGene00000226
WBGene00000226	ENSG00000253729	WBGene00000226
WBGene00000227	ENSG00000149311	WBGene00000227
WBGene00000228	ENSG00000072110	WBGene00000228
WBGene00000228	ENSG00000077522	WBGene00000228
WBGene00000228	ENSG00000130402	WBGene00000228
WBGene00000228	ENSG00000248746	WBGene00000228
WBGene00000229	ENSG00000110955	WBGene00000229
WBGene00000230	ENSG00000241837	WBGene00000230
WBGene00000230	ENSG00000249209	WBGene00000230
WBGene00000231	ENSG00000168488	WBGene00000231
WBGene00000231	ENSG00000204842	WBGene00000231
WBGene00000232	ENSG00000101958	WBGene00000232
WBGene00000232	ENSG00000109738	WBGene00000232
WBGene00000232	ENSG00000145451	WBGene00000232
WBGene00000232	ENSG00000145888	WBGene00000232
WBGene00000232	ENSG00000188828	WBGene00000232
WBGene00000233	ENSG00000101958	WBGene00000233
WBGene00000233	ENSG00000109738	WBGene00000233
WBGene00000233	ENSG00000145451	WBGene00000233
WBGene00000233	ENSG00000145888	WBGene00000233
WBGene00000233	ENSG00000188828	WBGene00000233
WBGene00000235	ENSG00000125888	WBGene00000235
WBGene00000238	ENSG00000168036	WBGene00000238
WBGene00000238	ENSG00000173801	WBGene00000238
WBGene00000239	ENSG00000132437	WBGene00000239
WBGene00000240	ENSG00000171759	WBGene00000240
WBGene00000241	ENSG00000174483	WBGene00000241
WBGene00000241	ENSG00000256349	WBGene00000241
WBGene00000242	ENSG00000125124	WBGene00000242
WBGene00000244	ENSG00000165533	WBGene00000244
WBGene00000246	ENSG00000122870	WBGene00000246
WBGene00000247	ENSG00000126581	WBGene00000247
WBGene00000247	ENSG00000196289	WBGene00000247
WBGene00000248	ENSG00000198211	WBGene00000248
WBGene00000248	ENSG00000258947	WBGene00000248
WBGene00000253	ENSG00000137857	WBGene00000253
WBGene00000253	ENSG00000140279	WBGene00000253
WBGene00000254	ENSG00000099139	WBGene00000254
WBGene00000254	ENSG00000140479	WBGene00000254
WBGene00000257	ENSG00000138160	WBGene00000257
WBGene00000259	ENSG00000159267	WBGene00000259
WBGene00000262	ENSG00000015171	WBGene00000262
WBGene00000266	ENSG00000112699	WBGene00000266
WBGene00000269	ENSG00000086062	WBGene00000269
WBGene00000269	ENSG00000117411	WBGene00000269
WBGene00000269	ENSG00000118276	WBGene00000269
WBGene00000269	ENSG00000121578	WBGene00000269
WBGene00000269	ENSG00000158470	WBGene00000269
WBGene00000269	ENSG00000158850	WBGene00000269
WBGene00000270	ENSG00000235863	WBGene00000270
WBGene00000271	ENSG00000185024	WBGene00000271
WBGene00000275	ENSG00000156970	WBGene00000275
WBGene00000275	ENSG00000169679	WBGene00000275
WBGene00000276	ENSG00000112578	WBGene00000276
WBGene00000277	ENSG00000107281	WBGene00000277
WBGene00000279	ENSG00000063180	WBGene00000279
WBGene00000279	ENSG00000154975	WBGene00000279
WBGene00000280	ENSG00000063180	WBGene00000280
WBGene00000280	ENSG00000154975	WBGene00000280
WBGene00000281	ENSG00000074410	WBGene00000281
WBGene00000281	ENSG00000104267	WBGene00000281
WBGene00000281	ENSG00000107159	WBGene00000281
WBGene00000281	ENSG00000118298	WBGene00000281
WBGene00000281	ENSG00000131686	WBGene00000281
WBGene00000281	ENSG00000133742	WBGene00000281
WBGene00000281	ENSG00000164879	WBGene00000281
WBGene00000281	ENSG00000167434	WBGene00000281
WBGene00000281	ENSG00000168748	WBGene00000281
WBGene00000281	ENSG00000169239	WBGene00000281
WBGene00000281	ENSG00000174990	WBGene00000281
WBGene00000281	ENSG00000178538	WBGene00000281
WBGene00000281	ENSG00000185015	WBGene00000281
WBGene00000283	ENSG00000074410	WBGene00000283
WBGene00000283	ENSG00000104267	WBGene00000283
WBGene00000283	ENSG00000107159	WBGene00000283
WBGene00000283	ENSG00000118298	WBGene00000283
WBGene00000283	ENSG00000131686	WBGene00000283
WBGene00000283	ENSG00000133742	WBGene00000283
WBGene00000283	ENSG00000164879	WBGene00000283
WBGene00000283	ENSG00000167434	WBGene00000283
WBGene00000283	ENSG00000168748	WBGene00000283
WBGene00000283	ENSG00000169239	WBGene00000283
WBGene00000283	ENSG00000174990	WBGene00000283
WBGene00000283	ENSG00000178538	WBGene00000283
WBGene00000283	ENSG00000185015	WBGene00000283
WBGene00000289	ENSG00000140538	WBGene00000289
WBGene00000289	ENSG00000148053	WBGene00000289
WBGene00000289	ENSG00000169071	WBGene00000289
WBGene00000289	ENSG00000185483	WBGene00000289
WBGene00000289	ENSG00000198400	WBGene00000289
WBGene00000292	ENSG00000116489	WBGene00000292
WBGene00000292	ENSG00000177938	WBGene00000292
WBGene00000292	ENSG00000198898	WBGene00000292
WBGene00000293	ENSG00000077549	WBGene00000293
WBGene00000294	ENSG00000112186	WBGene00000294
WBGene00000294	ENSG00000131236	WBGene00000294
WBGene00000295	ENSG00000036565	WBGene00000295
WBGene00000295	ENSG00000165646	WBGene00000295
WBGene00000296	ENSG00000180176	WBGene00000296
WBGene00000298	ENSG00000131979	WBGene00000298
WBGene00000301	ENSG00000105971	WBGene00000301
WBGene00000301	ENSG00000105974	WBGene00000301
WBGene00000301	ENSG00000182533	WBGene00000301
WBGene00000366	ENSG00000005339	WBGene00000366
WBGene00000366	ENSG00000100393	WBGene00000366
WBGene00000367	ENSG00000006283	WBGene00000367
WBGene00000367	ENSG00000100346	WBGene00000367
WBGene00000367	ENSG00000196557	WBGene00000367
WBGene00000368	ENSG00000067191	WBGene00000368
WBGene00000368	ENSG00000165995	WBGene00000368
WBGene00000368	ENSG00000167535	WBGene00000368
WBGene00000368	ENSG00000182389	WBGene00000368
WBGene00000368	ENSG00000283228	WBGene00000368
WBGene00000369	ENSG00000155508	WBGene00000369
WBGene00000369	ENSG00000198791	WBGene00000369
WBGene00000371	ENSG00000135940	WBGene00000371
WBGene00000372	ENSG00000021461	WBGene00000372
WBGene00000372	ENSG00000059377	WBGene00000372
WBGene00000372	ENSG00000106258	WBGene00000372
WBGene00000372	ENSG00000160868	WBGene00000372
WBGene00000372	ENSG00000160870	WBGene00000372
WBGene00000372	ENSG00000282301	WBGene00000372
WBGene00000373	ENSG00000100197	WBGene00000373
WBGene00000373	ENSG00000134716	WBGene00000373
WBGene00000373	ENSG00000155016	WBGene00000373
WBGene00000373	ENSG00000186104	WBGene00000373
WBGene00000373	ENSG00000205702	WBGene00000373
WBGene00000375	ENSG00000019186	WBGene00000375
WBGene00000375	ENSG00000111012	WBGene00000375
WBGene00000375	ENSG00000135929	WBGene00000375
WBGene00000375	ENSG00000140459	WBGene00000375
WBGene00000375	ENSG00000160882	WBGene00000375
WBGene00000375	ENSG00000179142	WBGene00000375
WBGene00000375	ENSG00000186684	WBGene00000375
WBGene00000376	ENSG00000113300	WBGene00000376
WBGene00000376	ENSG00000138767	WBGene00000376
WBGene00000377	ENSG00000120438	WBGene00000377
WBGene00000378	ENSG00000166226	WBGene00000378
WBGene00000379	ENSG00000115484	WBGene00000379
WBGene00000380	ENSG00000150753	WBGene00000380
WBGene00000381	ENSG00000132141	WBGene00000381
WBGene00000381	ENSG00000146731	WBGene00000381
WBGene00000382	ENSG00000094804	WBGene00000382
WBGene00000383	ENSG00000079335	WBGene00000383
WBGene00000383	ENSG00000081377	WBGene00000383
WBGene00000383	ENSG00000158716	WBGene00000383
WBGene00000386	ENSG00000101224	WBGene00000386
WBGene00000386	ENSG00000158402	WBGene00000386
WBGene00000386	ENSG00000164045	WBGene00000386
WBGene00000387	ENSG00000101224	WBGene00000387
WBGene00000387	ENSG00000158402	WBGene00000387
WBGene00000387	ENSG00000164045	WBGene00000387
WBGene00000388	ENSG00000101224	WBGene00000388
WBGene00000388	ENSG00000158402	WBGene00000388
WBGene00000388	ENSG00000164045	WBGene00000388
WBGene00000389	ENSG00000101224	WBGene00000389
WBGene00000389	ENSG00000158402	WBGene00000389
WBGene00000389	ENSG00000164045	WBGene00000389
WBGene00000390	ENSG00000070831	WBGene00000390
WBGene00000391	ENSG00000158825	WBGene00000391
WBGene00000392	ENSG00000158825	WBGene00000392
WBGene00000393	ENSG00000170385	WBGene00000393
WBGene00000395	ENSG00000150275	WBGene00000395
WBGene00000396	ENSG00000083857	WBGene00000396
WBGene00000396	ENSG00000086570	WBGene00000396
WBGene00000396	ENSG00000165323	WBGene00000396
WBGene00000397	ENSG00000150275	WBGene00000397
WBGene00000399	ENSG00000113209	WBGene00000399
WBGene00000399	ENSG00000150275	WBGene00000399
WBGene00000399	ENSG00000253767	WBGene00000399
WBGene00000399	ENSG00000253910	WBGene00000399
WBGene00000399	ENSG00000254122	WBGene00000399
WBGene00000399	ENSG00000254245	WBGene00000399
WBGene00000399	ENSG00000262209	WBGene00000399
WBGene00000401	ENSG00000148600	WBGene00000401
WBGene00000401	ENSG00000150275	WBGene00000401
WBGene00000402	ENSG00000150275	WBGene00000402
WBGene00000403	ENSG00000139182	WBGene00000403
WBGene00000403	ENSG00000158258	WBGene00000403
WBGene00000403	ENSG00000171603	WBGene00000403
WBGene00000405	ENSG00000170312	WBGene00000405
WBGene00000406	ENSG00000105810	WBGene00000406
WBGene00000406	ENSG00000135446	WBGene00000406
WBGene00000407	ENSG00000164885	WBGene00000407
WBGene00000408	ENSG00000134058	WBGene00000408
WBGene00000409	ENSG00000132964	WBGene00000409
WBGene00000409	ENSG00000155111	WBGene00000409
WBGene00000410	ENSG00000136807	WBGene00000410
WBGene00000411	ENSG00000163950	WBGene00000411
WBGene00000412	ENSG00000146267	WBGene00000412
WBGene00000413	ENSG00000167513	WBGene00000413
WBGene00000415	ENSG00000074660	WBGene00000415
WBGene00000415	ENSG00000145794	WBGene00000415
WBGene00000415	ENSG00000157890	WBGene00000415
WBGene00000415	ENSG00000187800	WBGene00000415
WBGene00000415	ENSG00000244486	WBGene00000415
WBGene00000416	ENSG00000099942	WBGene00000416
WBGene00000416	ENSG00000167193	WBGene00000416
WBGene00000417	ENSG00000105141	WBGene00000417
WBGene00000417	ENSG00000106144	WBGene00000417
WBGene00000417	ENSG00000132906	WBGene00000417
WBGene00000417	ENSG00000137752	WBGene00000417
WBGene00000417	ENSG00000137757	WBGene00000417
WBGene00000417	ENSG00000196954	WBGene00000417
WBGene00000417	ENSG00000204403	WBGene00000417
WBGene00000419	ENSG00000088538	WBGene00000419
WBGene00000419	ENSG00000128512	WBGene00000419
WBGene00000419	ENSG00000134516	WBGene00000419
WBGene00000419	ENSG00000147459	WBGene00000419
WBGene00000419	ENSG00000150760	WBGene00000419
WBGene00000420	ENSG00000144366	WBGene00000420
WBGene00000421	ENSG00000141338	WBGene00000421
WBGene00000421	ENSG00000154258	WBGene00000421
WBGene00000421	ENSG00000154262	WBGene00000421
WBGene00000421	ENSG00000154263	WBGene00000421
WBGene00000421	ENSG00000154265	WBGene00000421
WBGene00000422	ENSG00000158156	WBGene00000422
WBGene00000422	ENSG00000171044	WBGene00000422
WBGene00000422	ENSG00000206579	WBGene00000422
WBGene00000422	ENSG00000221947	WBGene00000422
WBGene00000422	ENSG00000260903	WBGene00000422
WBGene00000422	ENSG00000275591	WBGene00000422
WBGene00000424	ENSG00000128340	WBGene00000424
WBGene00000424	ENSG00000136238	WBGene00000424
WBGene00000424	ENSG00000169750	WBGene00000424
WBGene00000424	ENSG00000177105	WBGene00000424
WBGene00000426	ENSG00000062598	WBGene00000426
WBGene00000426	ENSG00000102890	WBGene00000426
WBGene00000426	ENSG00000155849	WBGene00000426
WBGene00000428	ENSG00000229544	WBGene00000428
WBGene00000428	ENSG00000235608	WBGene00000428
WBGene00000429	ENSG00000116035	WBGene00000429
WBGene00000429	ENSG00000135638	WBGene00000429
WBGene00000429	ENSG00000148704	WBGene00000429
WBGene00000429	ENSG00000170370	WBGene00000429
WBGene00000429	ENSG00000214513	WBGene00000429
WBGene00000430	ENSG00000116035	WBGene00000430
WBGene00000430	ENSG00000148704	WBGene00000430
WBGene00000430	ENSG00000214513	WBGene00000430
WBGene00000431	ENSG00000064835	WBGene00000431
WBGene00000431	ENSG00000184486	WBGene00000431
WBGene00000431	ENSG00000185668	WBGene00000431
WBGene00000431	ENSG00000196767	WBGene00000431
WBGene00000431	ENSG00000198914	WBGene00000431
WBGene00000432	ENSG00000116035	WBGene00000432
WBGene00000432	ENSG00000148704	WBGene00000432
WBGene00000432	ENSG00000151650	WBGene00000432
WBGene00000432	ENSG00000214513	WBGene00000432
WBGene00000433	ENSG00000004848	WBGene00000433
WBGene00000433	ENSG00000134438	WBGene00000433
WBGene00000433	ENSG00000173976	WBGene00000433
WBGene00000435	ENSG00000100987	WBGene00000435
WBGene00000435	ENSG00000119614	WBGene00000435
WBGene00000435	ENSG00000163666	WBGene00000435
WBGene00000436	ENSG00000005102	WBGene00000436
WBGene00000436	ENSG00000106511	WBGene00000436
WBGene00000436	ENSG00000151650	WBGene00000436
WBGene00000437	ENSG00000105991	WBGene00000437
WBGene00000437	ENSG00000120094	WBGene00000437
WBGene00000437	ENSG00000128645	WBGene00000437
WBGene00000438	ENSG00000107187	WBGene00000438
WBGene00000438	ENSG00000121454	WBGene00000438
WBGene00000439	ENSG00000163064	WBGene00000439
WBGene00000439	ENSG00000164778	WBGene00000439
WBGene00000440	ENSG00000004848	WBGene00000440
WBGene00000440	ENSG00000052850	WBGene00000440
WBGene00000440	ENSG00000109132	WBGene00000440
WBGene00000440	ENSG00000116132	WBGene00000440
WBGene00000440	ENSG00000134438	WBGene00000440
WBGene00000440	ENSG00000156150	WBGene00000440
WBGene00000440	ENSG00000165462	WBGene00000440
WBGene00000440	ENSG00000167157	WBGene00000440
WBGene00000440	ENSG00000168779	WBGene00000440
WBGene00000440	ENSG00000171540	WBGene00000440
WBGene00000440	ENSG00000173976	WBGene00000440
WBGene00000440	ENSG00000180318	WBGene00000440
WBGene00000440	ENSG00000185960	WBGene00000440
WBGene00000441	ENSG00000028277	WBGene00000441
WBGene00000441	ENSG00000137709	WBGene00000441
WBGene00000441	ENSG00000143190	WBGene00000441
WBGene00000442	ENSG00000165066	WBGene00000442
WBGene00000443	ENSG00000105717	WBGene00000443
WBGene00000443	ENSG00000167081	WBGene00000443
WBGene00000443	ENSG00000185630	WBGene00000443
WBGene00000443	ENSG00000204304	WBGene00000443
WBGene00000445	ENSG00000136327	WBGene00000445
WBGene00000446	ENSG00000116035	WBGene00000446
WBGene00000446	ENSG00000135638	WBGene00000446
WBGene00000446	ENSG00000148704	WBGene00000446
WBGene00000446	ENSG00000170370	WBGene00000446
WBGene00000446	ENSG00000214513	WBGene00000446
WBGene00000447	ENSG00000125816	WBGene00000447
WBGene00000447	ENSG00000136352	WBGene00000447
WBGene00000448	ENSG00000117707	WBGene00000448
WBGene00000448	ENSG00000119608	WBGene00000448
WBGene00000449	ENSG00000125816	WBGene00000449
WBGene00000449	ENSG00000136352	WBGene00000449
WBGene00000450	ENSG00000119919	WBGene00000450
WBGene00000450	ENSG00000180053	WBGene00000450
WBGene00000450	ENSG00000183072	WBGene00000450
WBGene00000451	ENSG00000125492	WBGene00000451
WBGene00000451	ENSG00000143032	WBGene00000451
WBGene00000452	ENSG00000125492	WBGene00000452
WBGene00000452	ENSG00000143032	WBGene00000452
WBGene00000453	ENSG00000138083	WBGene00000453
WBGene00000453	ENSG00000184302	WBGene00000453
WBGene00000454	ENSG00000126778	WBGene00000454
WBGene00000454	ENSG00000170577	WBGene00000454
WBGene00000457	ENSG00000105392	WBGene00000457
WBGene00000457	ENSG00000115507	WBGene00000457
WBGene00000457	ENSG00000165588	WBGene00000457
WBGene00000457	ENSG00000185155	WBGene00000457
WBGene00000457	ENSG00000274529	WBGene00000457
WBGene00000458	ENSG00000105392	WBGene00000458
WBGene00000458	ENSG00000115507	WBGene00000458
WBGene00000458	ENSG00000165588	WBGene00000458
WBGene00000461	ENSG00000105717	WBGene00000461
WBGene00000461	ENSG00000167081	WBGene00000461
WBGene00000461	ENSG00000185630	WBGene00000461
WBGene00000461	ENSG00000204304	WBGene00000461
WBGene00000463	ENSG00000006377	WBGene00000463
WBGene00000463	ENSG00000064195	WBGene00000463
WBGene00000463	ENSG00000105880	WBGene00000463
WBGene00000463	ENSG00000108813	WBGene00000463
WBGene00000463	ENSG00000115844	WBGene00000463
WBGene00000463	ENSG00000144355	WBGene00000463
WBGene00000464	ENSG00000111249	WBGene00000464
WBGene00000464	ENSG00000257923	WBGene00000464
WBGene00000466	ENSG00000111880	WBGene00000466
WBGene00000468	ENSG00000215397	WBGene00000468
WBGene00000468	ENSG00000261678	WBGene00000468
WBGene00000469	ENSG00000105516	WBGene00000469
WBGene00000469	ENSG00000108924	WBGene00000469
WBGene00000469	ENSG00000167074	WBGene00000469
WBGene00000472	ENSG00000006047	WBGene00000472
WBGene00000472	ENSG00000060138	WBGene00000472
WBGene00000472	ENSG00000065978	WBGene00000472
WBGene00000473	ENSG00000006047	WBGene00000473
WBGene00000473	ENSG00000060138	WBGene00000473
WBGene00000473	ENSG00000065978	WBGene00000473
WBGene00000474	ENSG00000006047	WBGene00000474
WBGene00000474	ENSG00000060138	WBGene00000474
WBGene00000474	ENSG00000065978	WBGene00000474
WBGene00000475	ENSG00000006047	WBGene00000475
WBGene00000475	ENSG00000060138	WBGene00000475
WBGene00000475	ENSG00000065978	WBGene00000475
WBGene00000476	ENSG00000116017	WBGene00000476
WBGene00000476	ENSG00000179361	WBGene00000476
WBGene00000476	ENSG00000205143	WBGene00000476
WBGene00000477	ENSG00000023839	WBGene00000477
WBGene00000477	ENSG00000091262	WBGene00000477
WBGene00000477	ENSG00000103222	WBGene00000477
WBGene00000477	ENSG00000108846	WBGene00000477
WBGene00000478	ENSG00000163251	WBGene00000478
WBGene00000478	ENSG00000177283	WBGene00000478
WBGene00000479	ENSG00000110367	WBGene00000479
WBGene00000480	ENSG00000100226	WBGene00000480
WBGene00000481	ENSG00000070748	WBGene00000481
WBGene00000482	ENSG00000111642	WBGene00000482
WBGene00000482	ENSG00000116254	WBGene00000482
WBGene00000482	ENSG00000170004	WBGene00000482
WBGene00000483	ENSG00000124613	WBGene00000483
WBGene00000483	ENSG00000165512	WBGene00000483
WBGene00000483	ENSG00000166526	WBGene00000483
WBGene00000483	ENSG00000172006	WBGene00000483
WBGene00000483	ENSG00000181638	WBGene00000483
WBGene00000483	ENSG00000182318	WBGene00000483
WBGene00000483	ENSG00000182983	WBGene00000483
WBGene00000483	ENSG00000185730	WBGene00000483
WBGene00000483	ENSG00000187607	WBGene00000483
WBGene00000483	ENSG00000196152	WBGene00000483
WBGene00000483	ENSG00000233757	WBGene00000483
WBGene00000483	ENSG00000249459	WBGene00000483
WBGene00000483	ENSG00000250571	WBGene00000483
WBGene00000483	ENSG00000264668	WBGene00000483
WBGene00000483	ENSG00000269693	WBGene00000483
WBGene00000484	ENSG00000068885	WBGene00000484
WBGene00000484	ENSG00000248710	WBGene00000484
WBGene00000485	ENSG00000187240	WBGene00000485
WBGene00000490	ENSG00000187535	WBGene00000490
WBGene00000491	ENSG00000189350	WBGene00000491
WBGene00000491	ENSG00000198718	WBGene00000491
WBGene00000492	ENSG00000114446	WBGene00000492
WBGene00000493	ENSG00000140323	WBGene00000493
WBGene00000493	ENSG00000154309	WBGene00000493
WBGene00000493	ENSG00000204624	WBGene00000493
WBGene00000498	ENSG00000149554	WBGene00000498
WBGene00000499	ENSG00000183765	WBGene00000499
WBGene00000500	ENSG00000103266	WBGene00000500
WBGene00000501	ENSG00000115665	WBGene00000501
WBGene00000502	ENSG00000110172	WBGene00000502
WBGene00000502	ENSG00000147166	WBGene00000502
WBGene00000503	ENSG00000064886	WBGene00000503
WBGene00000503	ENSG00000085465	WBGene00000503
WBGene00000503	ENSG00000133048	WBGene00000503
WBGene00000503	ENSG00000133063	WBGene00000503
WBGene00000503	ENSG00000134216	WBGene00000503
WBGene00000506	ENSG00000112237	WBGene00000506
WBGene00000507	ENSG00000082258	WBGene00000507
WBGene00000507	ENSG00000129315	WBGene00000507
WBGene00000508	ENSG00000082258	WBGene00000508
WBGene00000508	ENSG00000129315	WBGene00000508
WBGene00000509	ENSG00000100288	WBGene00000509
WBGene00000509	ENSG00000110721	WBGene00000509
WBGene00000509	ENSG00000254413	WBGene00000509
WBGene00000510	ENSG00000100288	WBGene00000510
WBGene00000510	ENSG00000110721	WBGene00000510
WBGene00000510	ENSG00000254413	WBGene00000510
WBGene00000511	ENSG00000100288	WBGene00000511
WBGene00000511	ENSG00000110721	WBGene00000511
WBGene00000511	ENSG00000254413	WBGene00000511
WBGene00000512	ENSG00000100288	WBGene00000512
WBGene00000512	ENSG00000110721	WBGene00000512
WBGene00000512	ENSG00000254413	WBGene00000512
WBGene00000513	ENSG00000100288	WBGene00000513
WBGene00000513	ENSG00000110721	WBGene00000513
WBGene00000513	ENSG00000254413	WBGene00000513
WBGene00000514	ENSG00000100288	WBGene00000514
WBGene00000514	ENSG00000110721	WBGene00000514
WBGene00000514	ENSG00000254413	WBGene00000514
WBGene00000515	ENSG00000139163	WBGene00000515
WBGene00000515	ENSG00000143845	WBGene00000515
WBGene00000518	ENSG00000004660	WBGene00000518
WBGene00000518	ENSG00000110931	WBGene00000518
WBGene00000519	ENSG00000196419	WBGene00000519
WBGene00000521	ENSG00000174576	WBGene00000521
WBGene00000527	ENSG00000182871	WBGene00000527
WBGene00000527	ENSG00000204291	WBGene00000527
WBGene00000528	ENSG00000114859	WBGene00000528
WBGene00000528	ENSG00000184908	WBGene00000528
WBGene00000528	ENSG00000186510	WBGene00000528
WBGene00000528	ENSG00000188037	WBGene00000528
WBGene00000529	ENSG00000114859	WBGene00000529
WBGene00000529	ENSG00000184908	WBGene00000529
WBGene00000529	ENSG00000186510	WBGene00000529
WBGene00000529	ENSG00000188037	WBGene00000529
WBGene00000530	ENSG00000114859	WBGene00000530
WBGene00000530	ENSG00000184908	WBGene00000530
WBGene00000530	ENSG00000186510	WBGene00000530
WBGene00000530	ENSG00000188037	WBGene00000530
WBGene00000531	ENSG00000114859	WBGene00000531
WBGene00000531	ENSG00000184908	WBGene00000531
WBGene00000531	ENSG00000186510	WBGene00000531
WBGene00000531	ENSG00000188037	WBGene00000531
WBGene00000532	ENSG00000073464	WBGene00000532
WBGene00000532	ENSG00000109572	WBGene00000532
WBGene00000532	ENSG00000171365	WBGene00000532
WBGene00000533	ENSG00000103249	WBGene00000533
WBGene00000536	ENSG00000167186	WBGene00000536
WBGene00000539	ENSG00000188603	WBGene00000539
WBGene00000539	ENSG00000261832	WBGene00000539
WBGene00000539	ENSG00000283220	WBGene00000539
WBGene00000540	ENSG00000188603	WBGene00000540
WBGene00000540	ENSG00000261832	WBGene00000540
WBGene00000540	ENSG00000283220	WBGene00000540
WBGene00000541	ENSG00000188603	WBGene00000541
WBGene00000541	ENSG00000261832	WBGene00000541
WBGene00000541	ENSG00000283220	WBGene00000541
WBGene00000542	ENSG00000014216	WBGene00000542
WBGene00000542	ENSG00000092529	WBGene00000542
WBGene00000542	ENSG00000135773	WBGene00000542
WBGene00000542	ENSG00000137225	WBGene00000542
WBGene00000542	ENSG00000162909	WBGene00000542
WBGene00000542	ENSG00000203697	WBGene00000542
WBGene00000543	ENSG00000131375	WBGene00000543
WBGene00000544	ENSG00000014216	WBGene00000544
WBGene00000544	ENSG00000092529	WBGene00000544
WBGene00000544	ENSG00000135773	WBGene00000544
WBGene00000544	ENSG00000137225	WBGene00000544
WBGene00000544	ENSG00000162909	WBGene00000544
WBGene00000544	ENSG00000203697	WBGene00000544
WBGene00000545	ENSG00000014216	WBGene00000545
WBGene00000545	ENSG00000092529	WBGene00000545
WBGene00000545	ENSG00000135773	WBGene00000545
WBGene00000545	ENSG00000137225	WBGene00000545
WBGene00000545	ENSG00000162909	WBGene00000545
WBGene00000545	ENSG00000203697	WBGene00000545
WBGene00000546	ENSG00000014216	WBGene00000546
WBGene00000546	ENSG00000092529	WBGene00000546
WBGene00000546	ENSG00000135773	WBGene00000546
WBGene00000546	ENSG00000137225	WBGene00000546
WBGene00000546	ENSG00000162909	WBGene00000546
WBGene00000546	ENSG00000203697	WBGene00000546
WBGene00000547	ENSG00000014216	WBGene00000547
WBGene00000547	ENSG00000092529	WBGene00000547
WBGene00000547	ENSG00000135773	WBGene00000547
WBGene00000547	ENSG00000137225	WBGene00000547
WBGene00000547	ENSG00000162909	WBGene00000547
WBGene00000547	ENSG00000203697	WBGene00000547
WBGene00000548	ENSG00000081237	WBGene00000548
WBGene00000548	ENSG00000110786	WBGene00000548
WBGene00000548	ENSG00000143851	WBGene00000548
WBGene00000548	ENSG00000153233	WBGene00000548
WBGene00000549	ENSG00000074054	WBGene00000549
WBGene00000549	ENSG00000163539	WBGene00000549
WBGene00000550	ENSG00000132361	WBGene00000550
WBGene00000552	ENSG00000143933	WBGene00000552
WBGene00000552	ENSG00000160014	WBGene00000552
WBGene00000552	ENSG00000178363	WBGene00000552
WBGene00000552	ENSG00000198668	WBGene00000552
WBGene00000553	ENSG00000008118	WBGene00000553
WBGene00000553	ENSG00000130822	WBGene00000553
WBGene00000553	ENSG00000134072	WBGene00000553
WBGene00000553	ENSG00000183049	WBGene00000553
WBGene00000554	ENSG00000188386	WBGene00000554
WBGene00000554	ENSG00000221823	WBGene00000554
WBGene00000554	ENSG00000273398	WBGene00000554
WBGene00000561	ENSG00000123307	WBGene00000561
WBGene00000561	ENSG00000162992	WBGene00000561
WBGene00000561	ENSG00000164600	WBGene00000561
WBGene00000561	ENSG00000171532	WBGene00000561
WBGene00000564	ENSG00000074706	WBGene00000564
WBGene00000564	ENSG00000142675	WBGene00000564
WBGene00000564	ENSG00000149970	WBGene00000564
WBGene00000564	ENSG00000153721	WBGene00000564
WBGene00000565	ENSG00000072818	WBGene00000565
WBGene00000565	ENSG00000114331	WBGene00000565
WBGene00000565	ENSG00000131584	WBGene00000565
WBGene00000566	ENSG00000133612	WBGene00000566
WBGene00000566	ENSG00000135439	WBGene00000566
WBGene00000566	ENSG00000157985	WBGene00000566
WBGene00000566	ENSG00000172650	WBGene00000566
WBGene00000566	ENSG00000188234	WBGene00000566
WBGene00000566	ENSG00000204149	WBGene00000566
WBGene00000566	ENSG00000204172	WBGene00000566
WBGene00000566	ENSG00000279058	WBGene00000566
WBGene00000567	ENSG00000127022	WBGene00000567
WBGene00000567	ENSG00000153132	WBGene00000567
WBGene00000583	ENSG00000034971	WBGene00000583
WBGene00000583	ENSG00000102837	WBGene00000583
WBGene00000583	ENSG00000105088	WBGene00000583
WBGene00000583	ENSG00000116774	WBGene00000583
WBGene00000583	ENSG00000118733	WBGene00000583
WBGene00000583	ENSG00000130558	WBGene00000583
WBGene00000583	ENSG00000162745	WBGene00000583
WBGene00000583	ENSG00000183801	WBGene00000583
WBGene00000583	ENSG00000185585	WBGene00000583
WBGene00000583	ENSG00000186417	WBGene00000583
WBGene00000584	ENSG00000148826	WBGene00000584
WBGene00000584	ENSG00000163623	WBGene00000584
WBGene00000584	ENSG00000165066	WBGene00000584
WBGene00000585	ENSG00000135775	WBGene00000585
WBGene00000591	ENSG00000164754	WBGene00000591
WBGene00000591	ENSG00000244588	WBGene00000591
WBGene00000603	ENSG00000065618	WBGene00000603
WBGene00000625	ENSG00000065618	WBGene00000625
WBGene00000674	ENSG00000049089	WBGene00000674
WBGene00000674	ENSG00000050767	WBGene00000674
WBGene00000674	ENSG00000082293	WBGene00000674
WBGene00000674	ENSG00000084636	WBGene00000674
WBGene00000674	ENSG00000092758	WBGene00000674
WBGene00000674	ENSG00000112280	WBGene00000674
WBGene00000674	ENSG00000124749	WBGene00000674
WBGene00000674	ENSG00000169436	WBGene00000674
WBGene00000674	ENSG00000188517	WBGene00000674
WBGene00000674	ENSG00000197467	WBGene00000674
WBGene00000708	ENSG00000049089	WBGene00000708
WBGene00000708	ENSG00000050767	WBGene00000708
WBGene00000708	ENSG00000082293	WBGene00000708
WBGene00000708	ENSG00000084636	WBGene00000708
WBGene00000708	ENSG00000092758	WBGene00000708
WBGene00000708	ENSG00000112280	WBGene00000708
WBGene00000708	ENSG00000124749	WBGene00000708
WBGene00000708	ENSG00000169436	WBGene00000708
WBGene00000708	ENSG00000188517	WBGene00000708
WBGene00000708	ENSG00000197467	WBGene00000708
WBGene00000750	ENSG00000065618	WBGene00000750
WBGene00000761	ENSG00000148459	WBGene00000761
WBGene00000762	ENSG00000173085	WBGene00000762
WBGene00000763	ENSG00000132423	WBGene00000763
WBGene00000764	ENSG00000167113	WBGene00000764
WBGene00000765	ENSG00000110871	WBGene00000765
WBGene00000766	ENSG00000119723	WBGene00000766
WBGene00000767	ENSG00000123815	WBGene00000767
WBGene00000767	ENSG00000163050	WBGene00000767
WBGene00000768	ENSG00000102879	WBGene00000768
WBGene00000768	ENSG00000110880	WBGene00000768
WBGene00000768	ENSG00000167549	WBGene00000768
WBGene00000768	ENSG00000172725	WBGene00000768
WBGene00000770	ENSG00000107864	WBGene00000770
WBGene00000770	ENSG00000113742	WBGene00000770
WBGene00000770	ENSG00000137449	WBGene00000770
WBGene00000771	ENSG00000107864	WBGene00000771
WBGene00000771	ENSG00000113742	WBGene00000771
WBGene00000771	ENSG00000137449	WBGene00000771
WBGene00000772	ENSG00000214575	WBGene00000772
WBGene00000772	ENSG00000260836	WBGene00000772
WBGene00000773	ENSG00000101138	WBGene00000773
WBGene00000774	ENSG00000101811	WBGene00000774
WBGene00000774	ENSG00000177613	WBGene00000774
WBGene00000776	ENSG00000135047	WBGene00000776
WBGene00000776	ENSG00000136943	WBGene00000776
WBGene00000776	ENSG00000143387	WBGene00000776
WBGene00000776	ENSG00000163131	WBGene00000776
WBGene00000777	ENSG00000064666	WBGene00000777
WBGene00000777	ENSG00000117519	WBGene00000777
WBGene00000777	ENSG00000130176	WBGene00000777
WBGene00000777	ENSG00000144834	WBGene00000777
WBGene00000777	ENSG00000149591	WBGene00000777
WBGene00000777	ENSG00000158710	WBGene00000777
WBGene00000778	ENSG00000064666	WBGene00000778
WBGene00000778	ENSG00000117519	WBGene00000778
WBGene00000778	ENSG00000130176	WBGene00000778
WBGene00000778	ENSG00000144834	WBGene00000778
WBGene00000778	ENSG00000149591	WBGene00000778
WBGene00000778	ENSG00000158710	WBGene00000778
WBGene00000779	ENSG00000064666	WBGene00000779
WBGene00000779	ENSG00000117519	WBGene00000779
WBGene00000779	ENSG00000130176	WBGene00000779
WBGene00000779	ENSG00000144834	WBGene00000779
WBGene00000779	ENSG00000149591	WBGene00000779
WBGene00000779	ENSG00000158710	WBGene00000779
WBGene00000780	ENSG00000064666	WBGene00000780
WBGene00000780	ENSG00000117519	WBGene00000780
WBGene00000780	ENSG00000130176	WBGene00000780
WBGene00000780	ENSG00000144834	WBGene00000780
WBGene00000780	ENSG00000149591	WBGene00000780
WBGene00000780	ENSG00000158710	WBGene00000780
WBGene00000781	ENSG00000164733	WBGene00000781
WBGene00000782	ENSG00000164733	WBGene00000782
WBGene00000783	ENSG00000164733	WBGene00000783
WBGene00000784	ENSG00000164733	WBGene00000784
WBGene00000785	ENSG00000164733	WBGene00000785
WBGene00000786	ENSG00000164733	WBGene00000786
WBGene00000787	ENSG00000167136	WBGene00000787
WBGene00000788	ENSG00000101160	WBGene00000788
WBGene00000789	ENSG00000101160	WBGene00000789
WBGene00000792	ENSG00000101384	WBGene00000792
WBGene00000792	ENSG00000128917	WBGene00000792
WBGene00000792	ENSG00000134376	WBGene00000792
WBGene00000792	ENSG00000148204	WBGene00000792
WBGene00000792	ENSG00000184916	WBGene00000792
WBGene00000792	ENSG00000198719	WBGene00000792
WBGene00000793	ENSG00000095794	WBGene00000793
WBGene00000793	ENSG00000118260	WBGene00000793
WBGene00000793	ENSG00000123268	WBGene00000793
WBGene00000794	ENSG00000168496	WBGene00000794
WBGene00000794	ENSG00000178295	WBGene00000794
WBGene00000796	ENSG00000171824	WBGene00000796
WBGene00000797	ENSG00000104626	WBGene00000797
WBGene00000798	ENSG00000077348	WBGene00000798
WBGene00000799	ENSG00000105612	WBGene00000799
WBGene00000799	ENSG00000137976	WBGene00000799
WBGene00000800	ENSG00000110619	WBGene00000800
WBGene00000802	ENSG00000179218	WBGene00000802
WBGene00000802	ENSG00000269058	WBGene00000802
WBGene00000803	ENSG00000182150	WBGene00000803
WBGene00000803	ENSG00000186871	WBGene00000803
WBGene00000812	ENSG00000007264	WBGene00000812
WBGene00000812	ENSG00000103653	WBGene00000812
WBGene00000813	ENSG00000169727	WBGene00000813
WBGene00000814	ENSG00000166200	WBGene00000814
WBGene00000815	ENSG00000141030	WBGene00000815
WBGene00000816	ENSG00000138663	WBGene00000816
WBGene00000817	ENSG00000121022	WBGene00000817
WBGene00000818	ENSG00000168090	WBGene00000818
WBGene00000819	ENSG00000105141	WBGene00000819
WBGene00000819	ENSG00000106144	WBGene00000819
WBGene00000819	ENSG00000132906	WBGene00000819
WBGene00000819	ENSG00000137752	WBGene00000819
WBGene00000819	ENSG00000137757	WBGene00000819
WBGene00000819	ENSG00000196954	WBGene00000819
WBGene00000819	ENSG00000204403	WBGene00000819
WBGene00000820	ENSG00000096696	WBGene00000820
WBGene00000820	ENSG00000105141	WBGene00000820
WBGene00000820	ENSG00000106144	WBGene00000820
WBGene00000820	ENSG00000118898	WBGene00000820
WBGene00000820	ENSG00000127603	WBGene00000820
WBGene00000820	ENSG00000132906	WBGene00000820
WBGene00000820	ENSG00000137752	WBGene00000820
WBGene00000820	ENSG00000137757	WBGene00000820
WBGene00000820	ENSG00000151914	WBGene00000820
WBGene00000820	ENSG00000167880	WBGene00000820
WBGene00000820	ENSG00000178209	WBGene00000820
WBGene00000820	ENSG00000196954	WBGene00000820
WBGene00000820	ENSG00000204403	WBGene00000820
WBGene00000820	ENSG00000214860	WBGene00000820
WBGene00000820	ENSG00000261150	WBGene00000820
WBGene00000821	ENSG00000105141	WBGene00000821
WBGene00000821	ENSG00000106144	WBGene00000821
WBGene00000821	ENSG00000132906	WBGene00000821
WBGene00000821	ENSG00000137752	WBGene00000821
WBGene00000821	ENSG00000137757	WBGene00000821
WBGene00000821	ENSG00000196954	WBGene00000821
WBGene00000821	ENSG00000204403	WBGene00000821
WBGene00000822	ENSG00000118729	WBGene00000822
WBGene00000822	ENSG00000143318	WBGene00000822
WBGene00000829	ENSG00000198727	WBGene00000829
WBGene00000830	ENSG00000121691	WBGene00000830
WBGene00000831	ENSG00000121691	WBGene00000831
WBGene00000832	ENSG00000119326	WBGene00000832
WBGene00000833	ENSG00000062485	WBGene00000833
WBGene00000834	ENSG00000123191	WBGene00000834
WBGene00000834	ENSG00000165240	WBGene00000834
WBGene00000836	ENSG00000055130	WBGene00000836
WBGene00000837	ENSG00000108094	WBGene00000837
WBGene00000838	ENSG00000036257	WBGene00000838
WBGene00000839	ENSG00000139842	WBGene00000839
WBGene00000839	ENSG00000158290	WBGene00000839
WBGene00000840	ENSG00000166266	WBGene00000840
WBGene00000841	ENSG00000055130	WBGene00000841
WBGene00000843	ENSG00000136986	WBGene00000843
WBGene00000846	ENSG00000055732	WBGene00000846
WBGene00000846	ENSG00000090674	WBGene00000846
WBGene00000846	ENSG00000153898	WBGene00000846
WBGene00000854	ENSG00000197976	WBGene00000854
WBGene00000857	ENSG00000162552	WBGene00000857
WBGene00000858	ENSG00000111186	WBGene00000858
WBGene00000858	ENSG00000114251	WBGene00000858
WBGene00000865	ENSG00000134057	WBGene00000865
WBGene00000865	ENSG00000157456	WBGene00000865
WBGene00000866	ENSG00000134057	WBGene00000866
WBGene00000866	ENSG00000157456	WBGene00000866
WBGene00000867	ENSG00000134057	WBGene00000867
WBGene00000867	ENSG00000157456	WBGene00000867
WBGene00000868	ENSG00000147082	WBGene00000868
WBGene00000869	ENSG00000179091	WBGene00000869
WBGene00000870	ENSG00000110092	WBGene00000870
WBGene00000870	ENSG00000112576	WBGene00000870
WBGene00000870	ENSG00000118971	WBGene00000870
WBGene00000871	ENSG00000105173	WBGene00000871
WBGene00000871	ENSG00000175305	WBGene00000871
WBGene00000872	ENSG00000131504	WBGene00000872
WBGene00000872	ENSG00000139734	WBGene00000872
WBGene00000872	ENSG00000147202	WBGene00000872
WBGene00000874	ENSG00000135655	WBGene00000874
WBGene00000874	ENSG00000170832	WBGene00000874
WBGene00000875	ENSG00000161800	WBGene00000875
WBGene00000876	ENSG00000163660	WBGene00000876
WBGene00000876	ENSG00000221978	WBGene00000876
WBGene00000880	ENSG00000100023	WBGene00000880
WBGene00000881	ENSG00000166794	WBGene00000881
WBGene00000881	ENSG00000168938	WBGene00000881
WBGene00000882	ENSG00000166794	WBGene00000882
WBGene00000882	ENSG00000168938	WBGene00000882
WBGene00000884	ENSG00000114857	WBGene00000884
WBGene00000884	ENSG00000138398	WBGene00000884
WBGene00000884	ENSG00000185250	WBGene00000884
WBGene00000885	ENSG00000114857	WBGene00000885
WBGene00000885	ENSG00000138398	WBGene00000885
WBGene00000885	ENSG00000185250	WBGene00000885
WBGene00000886	ENSG00000240344	WBGene00000886
WBGene00000887	ENSG00000171960	WBGene00000887
WBGene00000888	ENSG00000137168	WBGene00000888
WBGene00000889	ENSG00000084072	WBGene00000889
WBGene00000890	ENSG00000131013	WBGene00000890
WBGene00000891	ENSG00000113593	WBGene00000891
WBGene00000892	ENSG00000153015	WBGene00000892
WBGene00000894	ENSG00000153071	WBGene00000894
WBGene00000894	ENSG00000173406	WBGene00000894
WBGene00000895	ENSG00000126733	WBGene00000895
WBGene00000895	ENSG00000276644	WBGene00000895
WBGene00000896	ENSG00000129562	WBGene00000896
WBGene00000898	ENSG00000027644	WBGene00000898
WBGene00000898	ENSG00000140443	WBGene00000898
WBGene00000898	ENSG00000171105	WBGene00000898
WBGene00000899	ENSG00000141646	WBGene00000899
WBGene00000900	ENSG00000135409	WBGene00000900
WBGene00000902	ENSG00000165186	WBGene00000902
WBGene00000902	ENSG00000182077	WBGene00000902
WBGene00000902	ENSG00000244694	WBGene00000902
WBGene00000904	ENSG00000113658	WBGene00000904
WBGene00000904	ENSG00000120693	WBGene00000904
WBGene00000904	ENSG00000166949	WBGene00000904
WBGene00000904	ENSG00000170365	WBGene00000904
WBGene00000904	ENSG00000175387	WBGene00000904
WBGene00000906	ENSG00000163913	WBGene00000906
WBGene00000910	ENSG00000141646	WBGene00000910
WBGene00000911	ENSG00000141564	WBGene00000911
WBGene00000912	ENSG00000118689	WBGene00000912
WBGene00000912	ENSG00000150907	WBGene00000912
WBGene00000912	ENSG00000184481	WBGene00000912
WBGene00000912	ENSG00000204060	WBGene00000912
WBGene00000913	ENSG00000171862	WBGene00000913
WBGene00000914	ENSG00000080298	WBGene00000914
WBGene00000914	ENSG00000087903	WBGene00000914
WBGene00000914	ENSG00000111783	WBGene00000914
WBGene00000914	ENSG00000132005	WBGene00000914
WBGene00000914	ENSG00000185002	WBGene00000914
WBGene00000915	ENSG00000080824	WBGene00000915
WBGene00000915	ENSG00000096384	WBGene00000915
WBGene00000917	ENSG00000106524	WBGene00000917
WBGene00000923	ENSG00000102030	WBGene00000923
WBGene00000923	ENSG00000156269	WBGene00000923
WBGene00000929	ENSG00000065911	WBGene00000929
WBGene00000929	ENSG00000120254	WBGene00000929
WBGene00000929	ENSG00000163738	WBGene00000929
WBGene00000931	ENSG00000166197	WBGene00000931
WBGene00000933	ENSG00000132676	WBGene00000933
WBGene00000934	ENSG00000103546	WBGene00000934
WBGene00000934	ENSG00000142319	WBGene00000934
WBGene00000935	ENSG00000092345	WBGene00000935
WBGene00000935	ENSG00000152430	WBGene00000935
WBGene00000935	ENSG00000187191	WBGene00000935
WBGene00000935	ENSG00000188120	WBGene00000935
WBGene00000935	ENSG00000205916	WBGene00000935
WBGene00000935	ENSG00000205944	WBGene00000935
WBGene00000936	ENSG00000130283	WBGene00000936
WBGene00000936	ENSG00000130385	WBGene00000936
WBGene00000936	ENSG00000130513	WBGene00000936
WBGene00000936	ENSG00000156574	WBGene00000936
WBGene00000936	ENSG00000163217	WBGene00000936
WBGene00000936	ENSG00000164404	WBGene00000936
WBGene00000936	ENSG00000184344	WBGene00000936
WBGene00000936	ENSG00000223802	WBGene00000936
WBGene00000936	ENSG00000263761	WBGene00000936
WBGene00000937	ENSG00000138231	WBGene00000937
WBGene00000938	ENSG00000143614	WBGene00000938
WBGene00000938	ENSG00000167491	WBGene00000938
WBGene00000939	ENSG00000100697	WBGene00000939
WBGene00000940	ENSG00000110063	WBGene00000940
WBGene00000941	ENSG00000126953	WBGene00000941
WBGene00000942	ENSG00000035403	WBGene00000942
WBGene00000950	ENSG00000111319	WBGene00000950
WBGene00000950	ENSG00000162572	WBGene00000950
WBGene00000950	ENSG00000166828	WBGene00000950
WBGene00000950	ENSG00000168447	WBGene00000950
WBGene00000951	ENSG00000149305	WBGene00000951
WBGene00000951	ENSG00000166736	WBGene00000951
WBGene00000951	ENSG00000178084	WBGene00000951
WBGene00000951	ENSG00000186038	WBGene00000951
WBGene00000951	ENSG00000186090	WBGene00000951
WBGene00000951	ENSG00000186919	WBGene00000951
WBGene00000952	ENSG00000111319	WBGene00000952
WBGene00000952	ENSG00000162572	WBGene00000952
WBGene00000952	ENSG00000166828	WBGene00000952
WBGene00000952	ENSG00000168447	WBGene00000952
WBGene00000955	ENSG00000149305	WBGene00000955
WBGene00000955	ENSG00000166736	WBGene00000955
WBGene00000955	ENSG00000178084	WBGene00000955
WBGene00000955	ENSG00000186038	WBGene00000955
WBGene00000955	ENSG00000186090	WBGene00000955
WBGene00000955	ENSG00000186919	WBGene00000955
WBGene00000958	ENSG00000145214	WBGene00000958
WBGene00000959	ENSG00000153933	WBGene00000959
WBGene00000960	ENSG00000058866	WBGene00000960
WBGene00000960	ENSG00000065357	WBGene00000960
WBGene00000960	ENSG00000136267	WBGene00000960
WBGene00000962	ENSG00000197102	WBGene00000962
WBGene00000963	ENSG00000072832	WBGene00000963
WBGene00000963	ENSG00000092964	WBGene00000963
WBGene00000963	ENSG00000113657	WBGene00000963
WBGene00000963	ENSG00000147647	WBGene00000963
WBGene00000963	ENSG00000151640	WBGene00000963
WBGene00000963	ENSG00000157851	WBGene00000963
WBGene00000964	ENSG00000072832	WBGene00000964
WBGene00000964	ENSG00000092964	WBGene00000964
WBGene00000964	ENSG00000113657	WBGene00000964
WBGene00000964	ENSG00000147647	WBGene00000964
WBGene00000964	ENSG00000151640	WBGene00000964
WBGene00000964	ENSG00000157851	WBGene00000964
WBGene00000965	ENSG00000102796	WBGene00000965
WBGene00000966	ENSG00000025423	WBGene00000966
WBGene00000966	ENSG00000073737	WBGene00000966
WBGene00000966	ENSG00000135437	WBGene00000966
WBGene00000966	ENSG00000139547	WBGene00000966
WBGene00000966	ENSG00000170426	WBGene00000966
WBGene00000967	ENSG00000170786	WBGene00000967
WBGene00000968	ENSG00000170786	WBGene00000968
WBGene00000969	ENSG00000103160	WBGene00000969
WBGene00000969	ENSG00000130948	WBGene00000969
WBGene00000969	ENSG00000149084	WBGene00000969
WBGene00000970	ENSG00000119471	WBGene00000970
WBGene00000971	ENSG00000102796	WBGene00000971
WBGene00000971	ENSG00000186153	WBGene00000971
WBGene00000971	ENSG00000258466	WBGene00000971
WBGene00000972	ENSG00000102796	WBGene00000972
WBGene00000972	ENSG00000186153	WBGene00000972
WBGene00000972	ENSG00000258466	WBGene00000972
WBGene00000973	ENSG00000157379	WBGene00000973
WBGene00000974	ENSG00000204228	WBGene00000974
WBGene00000976	ENSG00000100867	WBGene00000976
WBGene00000976	ENSG00000157326	WBGene00000976
WBGene00000976	ENSG00000187630	WBGene00000976
WBGene00000979	ENSG00000025423	WBGene00000979
WBGene00000979	ENSG00000073737	WBGene00000979
WBGene00000979	ENSG00000135437	WBGene00000979
WBGene00000979	ENSG00000139547	WBGene00000979
WBGene00000979	ENSG00000170426	WBGene00000979
WBGene00000980	ENSG00000102796	WBGene00000980
WBGene00000980	ENSG00000186153	WBGene00000980
WBGene00000980	ENSG00000258466	WBGene00000980
WBGene00000981	ENSG00000119471	WBGene00000981
WBGene00000982	ENSG00000170786	WBGene00000982
WBGene00000983	ENSG00000025423	WBGene00000983
WBGene00000983	ENSG00000073737	WBGene00000983
WBGene00000983	ENSG00000135437	WBGene00000983
WBGene00000983	ENSG00000139547	WBGene00000983
WBGene00000983	ENSG00000170426	WBGene00000983
WBGene00000984	ENSG00000169738	WBGene00000984
WBGene00000987	ENSG00000102796	WBGene00000987
WBGene00000987	ENSG00000169084	WBGene00000987
WBGene00000988	ENSG00000204228	WBGene00000988
WBGene00000989	ENSG00000157379	WBGene00000989
WBGene00000990	ENSG00000103160	WBGene00000990
WBGene00000990	ENSG00000130948	WBGene00000990
WBGene00000990	ENSG00000149084	WBGene00000990
WBGene00000991	ENSG00000132631	WBGene00000991
WBGene00000991	ENSG00000133835	WBGene00000991
WBGene00000993	ENSG00000109016	WBGene00000993
WBGene00000993	ENSG00000184544	WBGene00000993
WBGene00000994	ENSG00000102786	WBGene00000994
WBGene00000994	ENSG00000165359	WBGene00000994
WBGene00000994	ENSG00000181433	WBGene00000994
WBGene00000994	ENSG00000228836	WBGene00000994
WBGene00000994	ENSG00000268940	WBGene00000994
WBGene00000994	ENSG00000269096	WBGene00000994
WBGene00000994	ENSG00000269586	WBGene00000994
WBGene00000994	ENSG00000270946	WBGene00000994
WBGene00000994	ENSG00000271449	WBGene00000994
WBGene00000994	ENSG00000273696	WBGene00000994
WBGene00000994	ENSG00000278085	WBGene00000994
WBGene00000994	ENSG00000278289	WBGene00000994
WBGene00000996	ENSG00000178537	WBGene00000996
WBGene00001001	ENSG00000083520	WBGene00001001
WBGene00001002	ENSG00000014138	WBGene00001002
WBGene00001005	ENSG00000264364	WBGene00001005
WBGene00001006	ENSG00000075711	WBGene00001006
WBGene00001006	ENSG00000082458	WBGene00001006
WBGene00001006	ENSG00000132535	WBGene00001006
WBGene00001006	ENSG00000150672	WBGene00001006
WBGene00001007	ENSG00000135720	WBGene00001007
WBGene00001007	ENSG00000144635	WBGene00001007
WBGene00001008	ENSG00000073803	WBGene00001008
WBGene00001008	ENSG00000139625	WBGene00001008
WBGene00001016	ENSG00000138346	WBGene00001016
WBGene00001017	ENSG00000204843	WBGene00001017
WBGene00001018	ENSG00000175203	WBGene00001018
WBGene00001019	ENSG00000148719	WBGene00001019
WBGene00001019	ENSG00000164031	WBGene00001019
WBGene00001019	ENSG00000170464	WBGene00001019
WBGene00001020	ENSG00000059769	WBGene00001020
WBGene00001020	ENSG00000244115	WBGene00001020
WBGene00001022	ENSG00000110011	WBGene00001022
WBGene00001023	ENSG00000135392	WBGene00001023
WBGene00001023	ENSG00000257390	WBGene00001023
WBGene00001025	ENSG00000102580	WBGene00001025
WBGene00001026	ENSG00000116138	WBGene00001026
WBGene00001027	ENSG00000007923	WBGene00001027
WBGene00001028	ENSG00000103423	WBGene00001028
WBGene00001029	ENSG00000105821	WBGene00001029
WBGene00001030	ENSG00000086061	WBGene00001030
WBGene00001030	ENSG00000140403	WBGene00001030
WBGene00001031	ENSG00000128590	WBGene00001031
WBGene00001031	ENSG00000187726	WBGene00001031
WBGene00001032	ENSG00000101152	WBGene00001032
WBGene00001032	ENSG00000147570	WBGene00001032
WBGene00001032	ENSG00000163793	WBGene00001032
WBGene00001033	ENSG00000100209	WBGene00001033
WBGene00001034	ENSG00000128590	WBGene00001034
WBGene00001035	ENSG00000168724	WBGene00001035
WBGene00001036	ENSG00000103423	WBGene00001036
WBGene00001036	ENSG00000128590	WBGene00001036
WBGene00001038	ENSG00000090520	WBGene00001038
WBGene00001038	ENSG00000283149	WBGene00001038
WBGene00001039	ENSG00000120675	WBGene00001039
WBGene00001040	ENSG00000104129	WBGene00001040
WBGene00001041	ENSG00000213551	WBGene00001041
WBGene00001042	ENSG00000105993	WBGene00001042
WBGene00001042	ENSG00000135924	WBGene00001042
WBGene00001042	ENSG00000172404	WBGene00001042
WBGene00001042	ENSG00000179407	WBGene00001042
WBGene00001044	ENSG00000148719	WBGene00001044
WBGene00001044	ENSG00000164031	WBGene00001044
WBGene00001044	ENSG00000170464	WBGene00001044
WBGene00001045	ENSG00000077232	WBGene00001045
WBGene00001046	ENSG00000102580	WBGene00001046
WBGene00001047	ENSG00000025796	WBGene00001047
WBGene00001048	ENSG00000126698	WBGene00001048
WBGene00001049	ENSG00000136492	WBGene00001049
WBGene00001050	ENSG00000204348	WBGene00001050
WBGene00001051	ENSG00000123975	WBGene00001051
WBGene00001051	ENSG00000173207	WBGene00001051
WBGene00001052	ENSG00000169676	WBGene00001052
WBGene00001052	ENSG00000184845	WBGene00001052
WBGene00001053	ENSG00000069696	WBGene00001053
WBGene00001053	ENSG00000149295	WBGene00001053
WBGene00001053	ENSG00000151577	WBGene00001053
WBGene00001054	ENSG00000078098	WBGene00001054
WBGene00001054	ENSG00000130226	WBGene00001054
WBGene00001054	ENSG00000175497	WBGene00001054
WBGene00001054	ENSG00000197635	WBGene00001054
WBGene00001055	ENSG00000078098	WBGene00001055
WBGene00001055	ENSG00000130226	WBGene00001055
WBGene00001055	ENSG00000175497	WBGene00001055
WBGene00001055	ENSG00000197635	WBGene00001055
WBGene00001056	ENSG00000074603	WBGene00001056
WBGene00001056	ENSG00000142002	WBGene00001056
WBGene00001057	ENSG00000164062	WBGene00001057
WBGene00001058	ENSG00000164062	WBGene00001058
WBGene00001059	ENSG00000164062	WBGene00001059
WBGene00001061	ENSG00000114126	WBGene00001061
WBGene00001061	ENSG00000183434	WBGene00001061
WBGene00001061	ENSG00000198176	WBGene00001061
WBGene00001073	ENSG00000125827	WBGene00001073
WBGene00001073	ENSG00000139921	WBGene00001073
WBGene00001077	ENSG00000072682	WBGene00001077
WBGene00001077	ENSG00000122884	WBGene00001077
WBGene00001078	ENSG00000156162	WBGene00001078
WBGene00001078	ENSG00000173852	WBGene00001078
WBGene00001078	ENSG00000177990	WBGene00001078
WBGene00001078	ENSG00000178904	WBGene00001078
WBGene00001080	ENSG00000081019	WBGene00001080
WBGene00001080	ENSG00000187257	WBGene00001080
WBGene00001081	ENSG00000144893	WBGene00001081
WBGene00001081	ENSG00000184634	WBGene00001081
WBGene00001082	ENSG00000161203	WBGene00001082
WBGene00001086	ENSG00000113810	WBGene00001086
WBGene00001087	ENSG00000010292	WBGene00001087
WBGene00001088	ENSG00000162961	WBGene00001088
WBGene00001089	ENSG00000138081	WBGene00001089
WBGene00001089	ENSG00000147912	WBGene00001089
WBGene00001090	ENSG00000107201	WBGene00001090
WBGene00001090	ENSG00000108771	WBGene00001090
WBGene00001090	ENSG00000115267	WBGene00001090
WBGene00001092	ENSG00000117505	WBGene00001092
WBGene00001093	ENSG00000087470	WBGene00001093
WBGene00001094	ENSG00000115866	WBGene00001094
WBGene00001095	ENSG00000117593	WBGene00001095
WBGene00001096	ENSG00000163666	WBGene00001096
WBGene00001101	ENSG00000004975	WBGene00001101
WBGene00001101	ENSG00000107404	WBGene00001101
WBGene00001101	ENSG00000150764	WBGene00001101
WBGene00001101	ENSG00000161202	WBGene00001101
WBGene00001102	ENSG00000004975	WBGene00001102
WBGene00001102	ENSG00000107404	WBGene00001102
WBGene00001102	ENSG00000150764	WBGene00001102
WBGene00001102	ENSG00000161202	WBGene00001102
WBGene00001106	ENSG00000146530	WBGene00001106
WBGene00001115	ENSG00000134769	WBGene00001115
WBGene00001115	ENSG00000138101	WBGene00001115
WBGene00001116	ENSG00000198929	WBGene00001116
WBGene00001116	ENSG00000254706	WBGene00001116
WBGene00001117	ENSG00000196659	WBGene00001117
WBGene00001117	ENSG00000197557	WBGene00001117
WBGene00001118	ENSG00000157796	WBGene00001118
WBGene00001119	ENSG00000103351	WBGene00001119
WBGene00001121	ENSG00000111837	WBGene00001121
WBGene00001121	ENSG00000112144	WBGene00001121
WBGene00001122	ENSG00000118096	WBGene00001122
WBGene00001127	ENSG00000204104	WBGene00001127
WBGene00001129	ENSG00000105948	WBGene00001129
WBGene00001130	ENSG00000079805	WBGene00001130
WBGene00001130	ENSG00000106976	WBGene00001130
WBGene00001130	ENSG00000157601	WBGene00001130
WBGene00001130	ENSG00000183486	WBGene00001130
WBGene00001130	ENSG00000197959	WBGene00001130
WBGene00001131	ENSG00000232125	WBGene00001131
WBGene00001132	ENSG00000122367	WBGene00001132
WBGene00001132	ENSG00000163110	WBGene00001132
WBGene00001132	ENSG00000196923	WBGene00001132
WBGene00001133	ENSG00000166664	WBGene00001133
WBGene00001133	ENSG00000175344	WBGene00001133
WBGene00001134	ENSG00000198836	WBGene00001134
WBGene00001135	ENSG00000091664	WBGene00001135
WBGene00001135	ENSG00000104888	WBGene00001135
WBGene00001135	ENSG00000179520	WBGene00001135
WBGene00001137	ENSG00000018625	WBGene00001137
WBGene00001137	ENSG00000075673	WBGene00001137
WBGene00001137	ENSG00000105409	WBGene00001137
WBGene00001137	ENSG00000105675	WBGene00001137
WBGene00001137	ENSG00000132681	WBGene00001137
WBGene00001137	ENSG00000163399	WBGene00001137
WBGene00001145	ENSG00000076344	WBGene00001145
WBGene00001145	ENSG00000108370	WBGene00001145
WBGene00001149	ENSG00000060982	WBGene00001149
WBGene00001149	ENSG00000105552	WBGene00001149
WBGene00001150	ENSG00000084754	WBGene00001150
WBGene00001151	ENSG00000134463	WBGene00001151
WBGene00001153	ENSG00000198721	WBGene00001153
WBGene00001154	ENSG00000121310	WBGene00001154
WBGene00001154	ENSG00000148090	WBGene00001154
WBGene00001155	ENSG00000127884	WBGene00001155
WBGene00001156	ENSG00000127884	WBGene00001156
WBGene00001157	ENSG00000113790	WBGene00001157
WBGene00001157	ENSG00000138796	WBGene00001157
WBGene00001158	ENSG00000113790	WBGene00001158
WBGene00001158	ENSG00000138796	WBGene00001158
WBGene00001160	ENSG00000073331	WBGene00001160
WBGene00001160	ENSG00000103319	WBGene00001160
WBGene00001161	ENSG00000133740	WBGene00001161
WBGene00001161	ENSG00000205250	WBGene00001161
WBGene00001162	ENSG00000007968	WBGene00001162
WBGene00001162	ENSG00000101412	WBGene00001162
WBGene00001162	ENSG00000112242	WBGene00001162
WBGene00001162	ENSG00000169016	WBGene00001162
WBGene00001163	ENSG00000090776	WBGene00001163
WBGene00001163	ENSG00000108947	WBGene00001163
WBGene00001163	ENSG00000125266	WBGene00001163
WBGene00001164	ENSG00000090776	WBGene00001164
WBGene00001164	ENSG00000108947	WBGene00001164
WBGene00001164	ENSG00000125266	WBGene00001164
WBGene00001166	ENSG00000108883	WBGene00001166
WBGene00001167	ENSG00000167658	WBGene00001167
WBGene00001168	ENSG00000101210	WBGene00001168
WBGene00001168	ENSG00000156508	WBGene00001168
WBGene00001169	ENSG00000101210	WBGene00001169
WBGene00001169	ENSG00000156508	WBGene00001169
WBGene00001171	ENSG00000140015	WBGene00001171
WBGene00001171	ENSG00000143473	WBGene00001171
WBGene00001171	ENSG00000284299	WBGene00001171
WBGene00001172	ENSG00000125851	WBGene00001172
WBGene00001173	ENSG00000185532	WBGene00001173
WBGene00001177	ENSG00000101333	WBGene00001177
WBGene00001178	ENSG00000129521	WBGene00001178
WBGene00001178	ENSG00000135766	WBGene00001178
WBGene00001178	ENSG00000268797	WBGene00001178
WBGene00001178	ENSG00000269858	WBGene00001178
WBGene00001179	ENSG00000182732	WBGene00001179
WBGene00001179	ENSG00000182901	WBGene00001179
WBGene00001182	ENSG00000039600	WBGene00001182
WBGene00001182	ENSG00000110693	WBGene00001182
WBGene00001182	ENSG00000134532	WBGene00001182
WBGene00001182	ENSG00000143842	WBGene00001182
WBGene00001184	ENSG00000066468	WBGene00001184
WBGene00001184	ENSG00000068078	WBGene00001184
WBGene00001184	ENSG00000077782	WBGene00001184
WBGene00001184	ENSG00000160867	WBGene00001184
WBGene00001186	ENSG00000102145	WBGene00001186
WBGene00001186	ENSG00000104447	WBGene00001186
WBGene00001186	ENSG00000107485	WBGene00001186
WBGene00001186	ENSG00000130700	WBGene00001186
WBGene00001186	ENSG00000136574	WBGene00001186
WBGene00001186	ENSG00000141448	WBGene00001186
WBGene00001186	ENSG00000179348	WBGene00001186
WBGene00001187	ENSG00000081248	WBGene00001187
WBGene00001187	ENSG00000102001	WBGene00001187
WBGene00001187	ENSG00000151067	WBGene00001187
WBGene00001187	ENSG00000157388	WBGene00001187
WBGene00001188	ENSG00000002745	WBGene00001188
WBGene00001188	ENSG00000085741	WBGene00001188
WBGene00001188	ENSG00000143816	WBGene00001188
WBGene00001188	ENSG00000158955	WBGene00001188
WBGene00001189	ENSG00000088882	WBGene00001189
WBGene00001189	ENSG00000106624	WBGene00001189
WBGene00001189	ENSG00000109472	WBGene00001189
WBGene00001189	ENSG00000109625	WBGene00001189
WBGene00001189	ENSG00000120054	WBGene00001189
WBGene00001189	ENSG00000121898	WBGene00001189
WBGene00001190	ENSG00000186795	WBGene00001190
WBGene00001194	ENSG00000111676	WBGene00001194
WBGene00001194	ENSG00000142599	WBGene00001194
WBGene00001196	ENSG00000088256	WBGene00001196
WBGene00001196	ENSG00000156052	WBGene00001196
WBGene00001202	ENSG00000116396	WBGene00001202
WBGene00001202	ENSG00000129159	WBGene00001202
WBGene00001202	ENSG00000131398	WBGene00001202
WBGene00001202	ENSG00000166006	WBGene00001202
WBGene00001204	ENSG00000075891	WBGene00001204
WBGene00001204	ENSG00000125618	WBGene00001204
WBGene00001204	ENSG00000196092	WBGene00001204
WBGene00001207	ENSG00000085276	WBGene00001207
WBGene00001207	ENSG00000142611	WBGene00001207
WBGene00001208	ENSG00000007866	WBGene00001208
WBGene00001208	ENSG00000074219	WBGene00001208
WBGene00001208	ENSG00000187079	WBGene00001208
WBGene00001208	ENSG00000197905	WBGene00001208
WBGene00001209	ENSG00000107581	WBGene00001209
WBGene00001210	ENSG00000168348	WBGene00001210
WBGene00001210	ENSG00000173404	WBGene00001210
WBGene00001215	ENSG00000076201	WBGene00001215
WBGene00001224	ENSG00000085832	WBGene00001224
WBGene00001224	ENSG00000127527	WBGene00001224
WBGene00001224	ENSG00000135597	WBGene00001224
WBGene00001224	ENSG00000169891	WBGene00001224
WBGene00001225	ENSG00000106263	WBGene00001225
WBGene00001226	ENSG00000184110	WBGene00001226
WBGene00001226	ENSG00000205609	WBGene00001226
WBGene00001227	ENSG00000100353	WBGene00001227
WBGene00001228	ENSG00000104408	WBGene00001228
WBGene00001229	ENSG00000175390	WBGene00001229
WBGene00001229	ENSG00000279081	WBGene00001229
WBGene00001230	ENSG00000130811	WBGene00001230
WBGene00001231	ENSG00000147677	WBGene00001231
WBGene00001232	ENSG00000084623	WBGene00001232
WBGene00001233	ENSG00000178982	WBGene00001233
WBGene00001234	ENSG00000242372	WBGene00001234
WBGene00001234	ENSG00000261582	WBGene00001234
WBGene00001235	ENSG00000103363	WBGene00001235
WBGene00001236	ENSG00000154582	WBGene00001236
WBGene00001237	ENSG00000154582	WBGene00001237
WBGene00001241	ENSG00000119915	WBGene00001241
WBGene00001241	ENSG00000170522	WBGene00001241
WBGene00001242	ENSG00000119915	WBGene00001242
WBGene00001242	ENSG00000170522	WBGene00001242
WBGene00001247	ENSG00000119915	WBGene00001247
WBGene00001247	ENSG00000170522	WBGene00001247
WBGene00001248	ENSG00000066629	WBGene00001248
WBGene00001248	ENSG00000125746	WBGene00001248
WBGene00001248	ENSG00000143924	WBGene00001248
WBGene00001248	ENSG00000149499	WBGene00001248
WBGene00001248	ENSG00000165521	WBGene00001248
WBGene00001248	ENSG00000214595	WBGene00001248
WBGene00001249	ENSG00000102145	WBGene00001249
WBGene00001249	ENSG00000104447	WBGene00001249
WBGene00001249	ENSG00000107485	WBGene00001249
WBGene00001249	ENSG00000179348	WBGene00001249
WBGene00001250	ENSG00000104447	WBGene00001250
WBGene00001252	ENSG00000104447	WBGene00001252
WBGene00001253	ENSG00000102145	WBGene00001253
WBGene00001253	ENSG00000104447	WBGene00001253
WBGene00001253	ENSG00000107485	WBGene00001253
WBGene00001253	ENSG00000130700	WBGene00001253
WBGene00001253	ENSG00000136574	WBGene00001253
WBGene00001253	ENSG00000141448	WBGene00001253
WBGene00001253	ENSG00000179348	WBGene00001253
WBGene00001258	ENSG00000021776	WBGene00001258
WBGene00001259	ENSG00000109111	WBGene00001259
WBGene00001262	ENSG00000127948	WBGene00001262
WBGene00001263	ENSG00000060718	WBGene00001263
WBGene00001263	ENSG00000080573	WBGene00001263
WBGene00001263	ENSG00000081052	WBGene00001263
WBGene00001263	ENSG00000108821	WBGene00001263
WBGene00001263	ENSG00000130635	WBGene00001263
WBGene00001263	ENSG00000134871	WBGene00001263
WBGene00001263	ENSG00000139219	WBGene00001263
WBGene00001263	ENSG00000164692	WBGene00001263
WBGene00001263	ENSG00000168542	WBGene00001263
WBGene00001263	ENSG00000169031	WBGene00001263
WBGene00001263	ENSG00000171502	WBGene00001263
WBGene00001263	ENSG00000187498	WBGene00001263
WBGene00001263	ENSG00000188153	WBGene00001263
WBGene00001263	ENSG00000196739	WBGene00001263
WBGene00001263	ENSG00000197565	WBGene00001263
WBGene00001263	ENSG00000204248	WBGene00001263
WBGene00001263	ENSG00000204262	WBGene00001263
WBGene00001281	ENSG00000130177	WBGene00001281
WBGene00001303	ENSG00000132432	WBGene00001303
WBGene00001320	ENSG00000198246	WBGene00001320
WBGene00001328	ENSG00000053747	WBGene00001328
WBGene00001328	ENSG00000112769	WBGene00001328
WBGene00001328	ENSG00000130702	WBGene00001328
WBGene00001329	ENSG00000049283	WBGene00001329
WBGene00001329	ENSG00000063245	WBGene00001329
WBGene00001329	ENSG00000072134	WBGene00001329
WBGene00001329	ENSG00000176177	WBGene00001329
WBGene00001330	ENSG00000131037	WBGene00001330
WBGene00001330	ENSG00000151491	WBGene00001330
WBGene00001330	ENSG00000177106	WBGene00001330
WBGene00001330	ENSG00000198758	WBGene00001330
WBGene00001331	ENSG00000100196	WBGene00001331
WBGene00001331	ENSG00000105438	WBGene00001331
WBGene00001331	ENSG00000136240	WBGene00001331
WBGene00001332	ENSG00000104626	WBGene00001332
WBGene00001333	ENSG00000092820	WBGene00001333
WBGene00001333	ENSG00000137710	WBGene00001333
WBGene00001333	ENSG00000147065	WBGene00001333
WBGene00001334	ENSG00000086619	WBGene00001334
WBGene00001334	ENSG00000197930	WBGene00001334
WBGene00001335	ENSG00000097033	WBGene00001335
WBGene00001335	ENSG00000148341	WBGene00001335
WBGene00001336	ENSG00000172053	WBGene00001336
WBGene00001337	ENSG00000136628	WBGene00001337
WBGene00001338	ENSG00000103356	WBGene00001338
WBGene00001340	ENSG00000048740	WBGene00001340
WBGene00001340	ENSG00000149187	WBGene00001340
WBGene00001352	ENSG00000083642	WBGene00001352
WBGene00001352	ENSG00000121892	WBGene00001352
WBGene00001358	ENSG00000213465	WBGene00001358
WBGene00001358	ENSG00000273003	WBGene00001358
WBGene00001365	ENSG00000112782	WBGene00001365
WBGene00001365	ENSG00000155962	WBGene00001365
WBGene00001365	ENSG00000159212	WBGene00001365
WBGene00001365	ENSG00000169504	WBGene00001365
WBGene00001365	ENSG00000169583	WBGene00001365
WBGene00001365	ENSG00000213719	WBGene00001365
WBGene00001366	ENSG00000102302	WBGene00001366
WBGene00001366	ENSG00000127084	WBGene00001366
WBGene00001366	ENSG00000139132	WBGene00001366
WBGene00001366	ENSG00000146192	WBGene00001366
WBGene00001368	ENSG00000066044	WBGene00001368
WBGene00001368	ENSG00000107105	WBGene00001368
WBGene00001368	ENSG00000162374	WBGene00001368
WBGene00001368	ENSG00000196361	WBGene00001368
WBGene00001371	ENSG00000112782	WBGene00001371
WBGene00001371	ENSG00000155962	WBGene00001371
WBGene00001371	ENSG00000159212	WBGene00001371
WBGene00001371	ENSG00000169504	WBGene00001371
WBGene00001371	ENSG00000169583	WBGene00001371
WBGene00001371	ENSG00000213719	WBGene00001371
WBGene00001372	ENSG00000100823	WBGene00001372
WBGene00001373	ENSG00000102287	WBGene00001373
WBGene00001373	ENSG00000113327	WBGene00001373
WBGene00001373	ENSG00000163285	WBGene00001373
WBGene00001373	ENSG00000182256	WBGene00001373
WBGene00001377	ENSG00000064655	WBGene00001377
WBGene00001377	ENSG00000104313	WBGene00001377
WBGene00001377	ENSG00000112319	WBGene00001377
WBGene00001377	ENSG00000158161	WBGene00001377
WBGene00001395	ENSG00000134824	WBGene00001395
WBGene00001395	ENSG00000149485	WBGene00001395
WBGene00001395	ENSG00000221968	WBGene00001395
WBGene00001396	ENSG00000134824	WBGene00001396
WBGene00001396	ENSG00000149485	WBGene00001396
WBGene00001396	ENSG00000221968	WBGene00001396
WBGene00001397	ENSG00000099194	WBGene00001397
WBGene00001397	ENSG00000145284	WBGene00001397
WBGene00001398	ENSG00000099194	WBGene00001398
WBGene00001398	ENSG00000145284	WBGene00001398
WBGene00001399	ENSG00000099194	WBGene00001399
WBGene00001399	ENSG00000145284	WBGene00001399
WBGene00001401	ENSG00000055917	WBGene00001401
WBGene00001401	ENSG00000134644	WBGene00001401
WBGene00001402	ENSG00000055917	WBGene00001402
WBGene00001402	ENSG00000134644	WBGene00001402
WBGene00001403	ENSG00000077942	WBGene00001403
WBGene00001403	ENSG00000115380	WBGene00001403
WBGene00001403	ENSG00000140092	WBGene00001403
WBGene00001403	ENSG00000163520	WBGene00001403
WBGene00001403	ENSG00000172638	WBGene00001403
WBGene00001404	ENSG00000130957	WBGene00001404
WBGene00001404	ENSG00000165140	WBGene00001404
WBGene00001405	ENSG00000084073	WBGene00001405
WBGene00001406	ENSG00000173653	WBGene00001406
WBGene00001410	ENSG00000113108	WBGene00001410
WBGene00001410	ENSG00000163697	WBGene00001410
WBGene00001410	ENSG00000166313	WBGene00001410
WBGene00001411	ENSG00000134461	WBGene00001411
WBGene00001411	ENSG00000141965	WBGene00001411
WBGene00001411	ENSG00000145780	WBGene00001411
WBGene00001411	ENSG00000169018	WBGene00001411
WBGene00001412	ENSG00000100034	WBGene00001412
WBGene00001412	ENSG00000175175	WBGene00001412
WBGene00001414	ENSG00000115155	WBGene00001414
WBGene00001414	ENSG00000135636	WBGene00001414
WBGene00001414	ENSG00000138119	WBGene00001414
WBGene00001414	ENSG00000214814	WBGene00001414
WBGene00001414	ENSG00000249715	WBGene00001414
WBGene00001423	ENSG00000105202	WBGene00001423
WBGene00001423	ENSG00000188573	WBGene00001423
WBGene00001424	ENSG00000214253	WBGene00001424
WBGene00001425	ENSG00000214253	WBGene00001425
WBGene00001426	ENSG00000173486	WBGene00001426
WBGene00001427	ENSG00000004478	WBGene00001427
WBGene00001427	ENSG00000077800	WBGene00001427
WBGene00001427	ENSG00000088832	WBGene00001427
WBGene00001427	ENSG00000096060	WBGene00001427
WBGene00001427	ENSG00000100442	WBGene00001427
WBGene00001427	ENSG00000105701	WBGene00001427
WBGene00001427	ENSG00000119782	WBGene00001427
WBGene00001427	ENSG00000198225	WBGene00001427
WBGene00001428	ENSG00000122642	WBGene00001428
WBGene00001428	ENSG00000134285	WBGene00001428
WBGene00001428	ENSG00000141756	WBGene00001428
WBGene00001429	ENSG00000122642	WBGene00001429
WBGene00001429	ENSG00000134285	WBGene00001429
WBGene00001429	ENSG00000141756	WBGene00001429
WBGene00001430	ENSG00000122642	WBGene00001430
WBGene00001430	ENSG00000134285	WBGene00001430
WBGene00001430	ENSG00000141756	WBGene00001430
WBGene00001431	ENSG00000004478	WBGene00001431
WBGene00001431	ENSG00000077800	WBGene00001431
WBGene00001431	ENSG00000096060	WBGene00001431
WBGene00001431	ENSG00000100442	WBGene00001431
WBGene00001431	ENSG00000105701	WBGene00001431
WBGene00001432	ENSG00000079150	WBGene00001432
WBGene00001432	ENSG00000106080	WBGene00001432
WBGene00001433	ENSG00000004478	WBGene00001433
WBGene00001433	ENSG00000077800	WBGene00001433
WBGene00001433	ENSG00000088832	WBGene00001433
WBGene00001433	ENSG00000096060	WBGene00001433
WBGene00001433	ENSG00000100442	WBGene00001433
WBGene00001433	ENSG00000105701	WBGene00001433
WBGene00001433	ENSG00000119782	WBGene00001433
WBGene00001433	ENSG00000198225	WBGene00001433
WBGene00001434	ENSG00000176165	WBGene00001434
WBGene00001438	ENSG00000176165	WBGene00001438
WBGene00001438	ENSG00000248767	WBGene00001438
WBGene00001439	ENSG00000049768	WBGene00001439
WBGene00001439	ENSG00000114861	WBGene00001439
WBGene00001439	ENSG00000128573	WBGene00001439
WBGene00001439	ENSG00000137166	WBGene00001439
WBGene00001440	ENSG00000141568	WBGene00001440
WBGene00001440	ENSG00000164379	WBGene00001440
WBGene00001440	ENSG00000164916	WBGene00001440
WBGene00001441	ENSG00000111206	WBGene00001441
WBGene00001443	ENSG00000177731	WBGene00001443
WBGene00001465	ENSG00000072182	WBGene00001465
WBGene00001465	ENSG00000108684	WBGene00001465
WBGene00001465	ENSG00000110881	WBGene00001465
WBGene00001465	ENSG00000213199	WBGene00001465
WBGene00001465	ENSG00000256394	WBGene00001465
WBGene00001470	ENSG00000076108	WBGene00001470
WBGene00001470	ENSG00000123636	WBGene00001470
WBGene00001475	ENSG00000008300	WBGene00001475
WBGene00001475	ENSG00000075275	WBGene00001475
WBGene00001475	ENSG00000143126	WBGene00001475
WBGene00001476	ENSG00000007933	WBGene00001476
WBGene00001476	ENSG00000010932	WBGene00001476
WBGene00001476	ENSG00000076258	WBGene00001476
WBGene00001476	ENSG00000094963	WBGene00001476
WBGene00001476	ENSG00000131781	WBGene00001476
WBGene00001477	ENSG00000007933	WBGene00001477
WBGene00001477	ENSG00000010932	WBGene00001477
WBGene00001477	ENSG00000076258	WBGene00001477
WBGene00001477	ENSG00000094963	WBGene00001477
WBGene00001477	ENSG00000131781	WBGene00001477
WBGene00001478	ENSG00000007933	WBGene00001478
WBGene00001478	ENSG00000010932	WBGene00001478
WBGene00001478	ENSG00000076258	WBGene00001478
WBGene00001478	ENSG00000094963	WBGene00001478
WBGene00001478	ENSG00000131781	WBGene00001478
WBGene00001479	ENSG00000007933	WBGene00001479
WBGene00001479	ENSG00000010932	WBGene00001479
WBGene00001479	ENSG00000076258	WBGene00001479
WBGene00001479	ENSG00000094963	WBGene00001479
WBGene00001479	ENSG00000131781	WBGene00001479
WBGene00001480	ENSG00000007933	WBGene00001480
WBGene00001480	ENSG00000010932	WBGene00001480
WBGene00001480	ENSG00000076258	WBGene00001480
WBGene00001480	ENSG00000094963	WBGene00001480
WBGene00001480	ENSG00000131781	WBGene00001480
WBGene00001481	ENSG00000107864	WBGene00001481
WBGene00001481	ENSG00000113742	WBGene00001481
WBGene00001481	ENSG00000137449	WBGene00001481
WBGene00001484	ENSG00000078328	WBGene00001484
WBGene00001484	ENSG00000100320	WBGene00001484
WBGene00001484	ENSG00000167281	WBGene00001484
WBGene00001485	ENSG00000188566	WBGene00001485
WBGene00001485	ENSG00000283590	WBGene00001485
WBGene00001486	ENSG00000165060	WBGene00001486
WBGene00001487	ENSG00000151422	WBGene00001487
WBGene00001487	ENSG00000182511	WBGene00001487
WBGene00001488	ENSG00000079819	WBGene00001488
WBGene00001488	ENSG00000082397	WBGene00001488
WBGene00001488	ENSG00000088367	WBGene00001488
WBGene00001488	ENSG00000159023	WBGene00001488
WBGene00001489	ENSG00000095203	WBGene00001489
WBGene00001489	ENSG00000115109	WBGene00001489
WBGene00001490	ENSG00000006607	WBGene00001490
WBGene00001490	ENSG00000152767	WBGene00001490
WBGene00001490	ENSG00000165694	WBGene00001490
WBGene00001491	ENSG00000007944	WBGene00001491
WBGene00001492	ENSG00000163629	WBGene00001492
WBGene00001492	ENSG00000170324	WBGene00001492
WBGene00001492	ENSG00000204179	WBGene00001492
WBGene00001493	ENSG00000139926	WBGene00001493
WBGene00001493	ENSG00000153303	WBGene00001493
WBGene00001494	ENSG00000070601	WBGene00001494
WBGene00001494	ENSG00000147234	WBGene00001494
WBGene00001494	ENSG00000169933	WBGene00001494
WBGene00001496	ENSG00000126391	WBGene00001496
WBGene00001497	ENSG00000179115	WBGene00001497
WBGene00001499	ENSG00000174013	WBGene00001499
WBGene00001500	ENSG00000087086	WBGene00001500
WBGene00001500	ENSG00000132446	WBGene00001500
WBGene00001500	ENSG00000167996	WBGene00001500
WBGene00001500	ENSG00000181867	WBGene00001500
WBGene00001501	ENSG00000087086	WBGene00001501
WBGene00001501	ENSG00000132446	WBGene00001501
WBGene00001501	ENSG00000167996	WBGene00001501
WBGene00001501	ENSG00000181867	WBGene00001501
WBGene00001502	ENSG00000128245	WBGene00001502
WBGene00001502	ENSG00000134308	WBGene00001502
WBGene00001502	ENSG00000164924	WBGene00001502
WBGene00001502	ENSG00000166913	WBGene00001502
WBGene00001502	ENSG00000170027	WBGene00001502
WBGene00001502	ENSG00000175793	WBGene00001502
WBGene00001503	ENSG00000091483	WBGene00001503
WBGene00001505	ENSG00000130383	WBGene00001505
WBGene00001505	ENSG00000156413	WBGene00001505
WBGene00001505	ENSG00000171124	WBGene00001505
WBGene00001505	ENSG00000172461	WBGene00001505
WBGene00001505	ENSG00000172728	WBGene00001505
WBGene00001505	ENSG00000180549	WBGene00001505
WBGene00001505	ENSG00000196371	WBGene00001505
WBGene00001505	ENSG00000196968	WBGene00001505
WBGene00001507	ENSG00000130383	WBGene00001507
WBGene00001507	ENSG00000156413	WBGene00001507
WBGene00001507	ENSG00000171124	WBGene00001507
WBGene00001507	ENSG00000172461	WBGene00001507
WBGene00001507	ENSG00000172728	WBGene00001507
WBGene00001507	ENSG00000180549	WBGene00001507
WBGene00001507	ENSG00000196371	WBGene00001507
WBGene00001507	ENSG00000196968	WBGene00001507
WBGene00001508	ENSG00000033170	WBGene00001508
WBGene00001509	ENSG00000116688	WBGene00001509
WBGene00001509	ENSG00000171109	WBGene00001509
WBGene00001510	ENSG00000105325	WBGene00001510
WBGene00001511	ENSG00000117399	WBGene00001511
WBGene00001511	ENSG00000164287	WBGene00001511
WBGene00001512	ENSG00000145864	WBGene00001512
WBGene00001512	ENSG00000163288	WBGene00001512
WBGene00001512	ENSG00000166206	WBGene00001512
WBGene00001512	ENSG00000268089	WBGene00001512
WBGene00001513	ENSG00000082068	WBGene00001513
WBGene00001515	ENSG00000105808	WBGene00001515
WBGene00001515	ENSG00000111344	WBGene00001515
[truncated: 14,341 more rows]

## Sheet: Homologene
CE_WB_CURRENT	HS_ENSG	CE_WB_OLD	CE_WB_COMMENT
WBGene00000001	ENSG00000145675	WBGene00000001
WBGene00000002	ENSG00000103064	WBGene00000002
WBGene00000003	ENSG00000155465	WBGene00000003
WBGene00000004	ENSG00000103064	WBGene00000004
WBGene00000020	ENSG00000165029	WBGene00000020
WBGene00000022	ENSG00000167972	WBGene00000022
WBGene00000035	ENSG00000087085	WBGene00000035
WBGene00000039	ENSG00000130234	WBGene00000039
WBGene00000040	ENSG00000122729	WBGene00000040
WBGene00000041	ENSG00000100412	WBGene00000041
WBGene00000046	ENSG00000175344	WBGene00000046
WBGene00000048	ENSG00000175344	WBGene00000048
WBGene00000049	ENSG00000175344	WBGene00000049
WBGene00000050	ENSG00000175344	WBGene00000050
WBGene00000053	ENSG00000175344	WBGene00000053
WBGene00000055	ENSG00000175344	WBGene00000055
WBGene00000060	ENSG00000129749	WBGene00000060
WBGene00000063	ENSG00000184009	WBGene00000063
WBGene00000064	ENSG00000184009	WBGene00000064
WBGene00000065	ENSG00000184009	WBGene00000065
WBGene00000066	ENSG00000184009	WBGene00000066
WBGene00000067	ENSG00000196834	WBGene00000067
WBGene00000068	ENSG00000162104	WBGene00000068
WBGene00000071	ENSG00000173175	WBGene00000071
WBGene00000072	ENSG00000087274	WBGene00000072
WBGene00000074	ENSG00000148848	WBGene00000074
WBGene00000075	ENSG00000151694	WBGene00000075
WBGene00000080	ENSG00000197381	WBGene00000080
WBGene00000081	ENSG00000018510	WBGene00000081
WBGene00000086	ENSG00000110514	WBGene00000086
WBGene00000089	ENSG00000069974	WBGene00000089
WBGene00000090	ENSG00000121879	WBGene00000090
WBGene00000092	ENSG00000121957	WBGene00000092
WBGene00000097	ENSG00000158552	WBGene00000097
WBGene00000099	ENSG00000087586	WBGene00000099
WBGene00000102	ENSG00000142208	WBGene00000102
WBGene00000103	ENSG00000142208	WBGene00000103
WBGene00000105	ENSG00000123908	WBGene00000105
WBGene00000106	ENSG00000123908	WBGene00000106
WBGene00000107	ENSG00000111275	WBGene00000107
WBGene00000108	ENSG00000111275	WBGene00000108
WBGene00000109	ENSG00000144908	WBGene00000109
WBGene00000110	ENSG00000072210	WBGene00000110
WBGene00000111	ENSG00000072210	WBGene00000111
WBGene00000112	ENSG00000159423	WBGene00000112
WBGene00000113	ENSG00000112294	WBGene00000113
WBGene00000114	ENSG00000119711	WBGene00000114
WBGene00000115	ENSG00000164904	WBGene00000115
WBGene00000116	ENSG00000118514	WBGene00000116
WBGene00000117	ENSG00000143149	WBGene00000117
WBGene00000118	ENSG00000143149	WBGene00000118
WBGene00000123	ENSG00000181222	WBGene00000123
WBGene00000142	ENSG00000142230	WBGene00000142
WBGene00000147	ENSG00000117362	WBGene00000147
WBGene00000148	ENSG00000162736	WBGene00000148
WBGene00000149	ENSG00000142192	WBGene00000149
WBGene00000150	ENSG00000129354	WBGene00000150
WBGene00000155	ENSG00000108039	WBGene00000155
WBGene00000157	ENSG00000042753	WBGene00000157
WBGene00000158	ENSG00000166747	WBGene00000158
WBGene00000159	ENSG00000182287	WBGene00000159
WBGene00000160	ENSG00000100280	WBGene00000160
WBGene00000161	ENSG00000183020	WBGene00000161
WBGene00000164	ENSG00000185009	WBGene00000164
WBGene00000165	ENSG00000157823	WBGene00000165
WBGene00000169	ENSG00000143595	WBGene00000169
WBGene00000170	ENSG00000143595	WBGene00000170
WBGene00000171	ENSG00000143595	WBGene00000171
WBGene00000172	ENSG00000103375	WBGene00000172
WBGene00000173	ENSG00000103375	WBGene00000173
WBGene00000174	ENSG00000103375	WBGene00000174
WBGene00000175	ENSG00000143595	WBGene00000175
WBGene00000180	ENSG00000113595	WBGene00000180
WBGene00000181	ENSG00000072506	WBGene00000181
WBGene00000182	ENSG00000143761	WBGene00000182
WBGene00000183	ENSG00000004059	WBGene00000183
WBGene00000184	ENSG00000165527	WBGene00000184
WBGene00000187	ENSG00000120805	WBGene00000187
WBGene00000188	ENSG00000138175	WBGene00000188
WBGene00000189	ENSG00000141748	WBGene00000189
WBGene00000192	ENSG00000143862	WBGene00000192
WBGene00000193	ENSG00000113966	WBGene00000193
WBGene00000195	ENSG00000137486	WBGene00000195
WBGene00000197	ENSG00000090861	WBGene00000197
WBGene00000198	ENSG00000099797	WBGene00000198
WBGene00000199	ENSG00000115091	WBGene00000199
WBGene00000200	ENSG00000138071	WBGene00000200
WBGene00000201	ENSG00000241685	WBGene00000201
WBGene00000203	ENSG00000111229	WBGene00000203
WBGene00000204	ENSG00000241553	WBGene00000204
WBGene00000204	ENSG00000250151	WBGene00000204
WBGene00000205	ENSG00000162704	WBGene00000205
WBGene00000208	ENSG00000103671	WBGene00000208
WBGene00000212	ENSG00000166311	WBGene00000212
WBGene00000217	ENSG00000117984	WBGene00000217
WBGene00000229	ENSG00000110955	WBGene00000229
WBGene00000230	ENSG00000241837	WBGene00000230
WBGene00000232	ENSG00000145888	WBGene00000232
WBGene00000233	ENSG00000145888	WBGene00000233
WBGene00000235	ENSG00000175334	WBGene00000235
WBGene00000240	ENSG00000171759	WBGene00000240
WBGene00000241	ENSG00000174483	WBGene00000241
WBGene00000241	ENSG00000256349	WBGene00000241
WBGene00000242	ENSG00000125124	WBGene00000242
WBGene00000244	ENSG00000165533	WBGene00000244
WBGene00000246	ENSG00000122870	WBGene00000246
WBGene00000247	ENSG00000126581	WBGene00000247
WBGene00000248	ENSG00000196230	WBGene00000248
WBGene00000253	ENSG00000140279	WBGene00000253
WBGene00000254	ENSG00000175426	WBGene00000254
WBGene00000259	ENSG00000159267	WBGene00000259
WBGene00000266	ENSG00000112699	WBGene00000266
WBGene00000269	ENSG00000117411	WBGene00000269
WBGene00000271	ENSG00000185024	WBGene00000271
WBGene00000276	ENSG00000112578	WBGene00000276
WBGene00000279	ENSG00000154975	WBGene00000279
WBGene00000280	ENSG00000154975	WBGene00000280
WBGene00000281	ENSG00000168748	WBGene00000281
WBGene00000282	ENSG00000174990	WBGene00000282
WBGene00000283	ENSG00000168748	WBGene00000283
WBGene00000289	ENSG00000169071	WBGene00000289
WBGene00000292	ENSG00000116489	WBGene00000292
WBGene00000293	ENSG00000077549	WBGene00000293
WBGene00000294	ENSG00000131236	WBGene00000294
WBGene00000295	ENSG00000165646	WBGene00000295
WBGene00000296	ENSG00000180176	WBGene00000296
WBGene00000298	ENSG00000131979	WBGene00000298
WBGene00000368	ENSG00000182389	WBGene00000368
WBGene00000368	ENSG00000283228	WBGene00000368
WBGene00000369	ENSG00000198791	WBGene00000369
WBGene00000372	ENSG00000282301	WBGene00000372
WBGene00000373	ENSG00000134716	WBGene00000373
WBGene00000375	ENSG00000019186	WBGene00000375
WBGene00000376	ENSG00000138767	WBGene00000376
WBGene00000377	ENSG00000120438	WBGene00000377
WBGene00000378	ENSG00000166226	WBGene00000378
WBGene00000379	ENSG00000115484	WBGene00000379
WBGene00000380	ENSG00000150753	WBGene00000380
WBGene00000381	ENSG00000146731	WBGene00000381
WBGene00000383	ENSG00000079335	WBGene00000383
WBGene00000390	ENSG00000070831	WBGene00000390
WBGene00000396	ENSG00000083857	WBGene00000396
WBGene00000397	ENSG00000150275	WBGene00000397
WBGene00000403	ENSG00000171603	WBGene00000403
WBGene00000405	ENSG00000170312	WBGene00000405
WBGene00000406	ENSG00000105810	WBGene00000406
WBGene00000407	ENSG00000164885	WBGene00000407
WBGene00000408	ENSG00000134058	WBGene00000408
WBGene00000409	ENSG00000132964	WBGene00000409
WBGene00000410	ENSG00000136807	WBGene00000410
WBGene00000415	ENSG00000157890	WBGene00000415
WBGene00000416	ENSG00000167193	WBGene00000416
WBGene00000419	ENSG00000150760	WBGene00000419
WBGene00000420	ENSG00000144366	WBGene00000420
WBGene00000422	ENSG00000171044	WBGene00000422
WBGene00000424	ENSG00000169750	WBGene00000424
WBGene00000426	ENSG00000155849	WBGene00000426
WBGene00000443	ENSG00000185630	WBGene00000443
WBGene00000466	ENSG00000111880	WBGene00000466
WBGene00000478	ENSG00000177283	WBGene00000478
WBGene00000479	ENSG00000110367	WBGene00000479
WBGene00000480	ENSG00000100226	WBGene00000480
WBGene00000481	ENSG00000070748	WBGene00000481
WBGene00000482	ENSG00000111642	WBGene00000482
WBGene00000484	ENSG00000068885	WBGene00000484
WBGene00000485	ENSG00000187240	WBGene00000485
WBGene00000490	ENSG00000187535	WBGene00000490
WBGene00000492	ENSG00000114446	WBGene00000492
WBGene00000498	ENSG00000149554	WBGene00000498
WBGene00000499	ENSG00000183765	WBGene00000499
WBGene00000500	ENSG00000103266	WBGene00000500
WBGene00000501	ENSG00000115665	WBGene00000501
WBGene00000502	ENSG00000110172	WBGene00000502
WBGene00000503	ENSG00000133063	WBGene00000503
WBGene00000506	ENSG00000112237	WBGene00000506
WBGene00000509	ENSG00000100288	WBGene00000509
WBGene00000510	ENSG00000110721	WBGene00000510
WBGene00000515	ENSG00000139163	WBGene00000515
WBGene00000518	ENSG00000110931	WBGene00000518
WBGene00000519	ENSG00000196419	WBGene00000519
WBGene00000530	ENSG00000114859	WBGene00000530
WBGene00000531	ENSG00000114859	WBGene00000531
WBGene00000532	ENSG00000109572	WBGene00000532
WBGene00000533	ENSG00000103249	WBGene00000533
WBGene00000536	ENSG00000167186	WBGene00000536
WBGene00000539	ENSG00000188603	WBGene00000539
WBGene00000539	ENSG00000261832	WBGene00000539
WBGene00000539	ENSG00000283220	WBGene00000539
WBGene00000540	ENSG00000188603	WBGene00000540
WBGene00000540	ENSG00000261832	WBGene00000540
WBGene00000540	ENSG00000283220	WBGene00000540
WBGene00000541	ENSG00000188603	WBGene00000541
WBGene00000541	ENSG00000261832	WBGene00000541
WBGene00000541	ENSG00000283220	WBGene00000541
WBGene00000542	ENSG00000203697	WBGene00000542
WBGene00000543	ENSG00000131375	WBGene00000543
WBGene00000544	ENSG00000203697	WBGene00000544
WBGene00000545	ENSG00000203697	WBGene00000545
WBGene00000546	ENSG00000203697	WBGene00000546
WBGene00000547	ENSG00000203697	WBGene00000547
WBGene00000549	ENSG00000163539	WBGene00000549
WBGene00000550	ENSG00000132361	WBGene00000550
WBGene00000554	ENSG00000221823	WBGene00000554
WBGene00000561	ENSG00000164600	WBGene00000561
WBGene00000565	ENSG00000114331	WBGene00000565
WBGene00000566	ENSG00000157985	WBGene00000566
WBGene00000567	ENSG00000127022	WBGene00000567
WBGene00000585	ENSG00000135775	WBGene00000585
WBGene00000591	ENSG00000244588	WBGene00000591
WBGene00000761	ENSG00000148459	WBGene00000761
WBGene00000762	ENSG00000173085	WBGene00000762
WBGene00000763	ENSG00000132423	WBGene00000763
WBGene00000764	ENSG00000167113	WBGene00000764
WBGene00000765	ENSG00000110871	WBGene00000765
WBGene00000766	ENSG00000119723	WBGene00000766
WBGene00000767	ENSG00000163050	WBGene00000767
WBGene00000768	ENSG00000110880	WBGene00000768
WBGene00000773	ENSG00000101138	WBGene00000773
WBGene00000776	ENSG00000136943	WBGene00000776
WBGene00000778	ENSG00000144834	WBGene00000778
WBGene00000787	ENSG00000167136	WBGene00000787
WBGene00000788	ENSG00000101160	WBGene00000788
WBGene00000794	ENSG00000168496	WBGene00000794
WBGene00000798	ENSG00000077348	WBGene00000798
WBGene00000799	ENSG00000137976	WBGene00000799
WBGene00000800	ENSG00000110619	WBGene00000800
WBGene00000802	ENSG00000179218	WBGene00000802
WBGene00000812	ENSG00000103653	WBGene00000812
WBGene00000817	ENSG00000121022	WBGene00000817
WBGene00000818	ENSG00000168090	WBGene00000818
WBGene00000822	ENSG00000143318	WBGene00000822
WBGene00000830	ENSG00000121691	WBGene00000830
WBGene00000831	ENSG00000121691	WBGene00000831
WBGene00000832	ENSG00000119326	WBGene00000832
WBGene00000833	ENSG00000062485	WBGene00000833
WBGene00000834	ENSG00000165240	WBGene00000834
WBGene00000836	ENSG00000055130	WBGene00000836
WBGene00000837	ENSG00000108094	WBGene00000837
WBGene00000838	ENSG00000036257	WBGene00000838
WBGene00000840	ENSG00000166266	WBGene00000840
WBGene00000843	ENSG00000136986	WBGene00000843
WBGene00000846	ENSG00000055732	WBGene00000846
WBGene00000857	ENSG00000162552	WBGene00000857
WBGene00000858	ENSG00000111186	WBGene00000858
WBGene00000869	ENSG00000179091	WBGene00000869
WBGene00000874	ENSG00000170832	WBGene00000874
WBGene00000877	ENSG00000196262	WBGene00000877
WBGene00000880	ENSG00000100023	WBGene00000880
WBGene00000881	ENSG00000166794	WBGene00000881
WBGene00000882	ENSG00000166794	WBGene00000882
WBGene00000886	ENSG00000240344	WBGene00000886
WBGene00000887	ENSG00000171960	WBGene00000887
WBGene00000888	ENSG00000137168	WBGene00000888
WBGene00000889	ENSG00000084072	WBGene00000889
WBGene00000890	ENSG00000131013	WBGene00000890
WBGene00000891	ENSG00000113593	WBGene00000891
WBGene00000892	ENSG00000153015	WBGene00000892
WBGene00000896	ENSG00000129562	WBGene00000896
WBGene00000898	ENSG00000140443	WBGene00000898
WBGene00000903	ENSG00000135414	WBGene00000903
WBGene00000906	ENSG00000163913	WBGene00000906
WBGene00000914	ENSG00000080298	WBGene00000914
WBGene00000915	ENSG00000096384	WBGene00000915
WBGene00000917	ENSG00000106524	WBGene00000917
WBGene00000923	ENSG00000102030	WBGene00000923
WBGene00000933	ENSG00000132676	WBGene00000933
WBGene00000934	ENSG00000103546	WBGene00000934
WBGene00000936	ENSG00000163217	WBGene00000936
WBGene00000937	ENSG00000138231	WBGene00000937
WBGene00000939	ENSG00000100697	WBGene00000939
WBGene00000940	ENSG00000110063	WBGene00000940
WBGene00000950	ENSG00000166828	WBGene00000950
WBGene00000952	ENSG00000166828	WBGene00000952
WBGene00000958	ENSG00000145214	WBGene00000958
WBGene00000959	ENSG00000153933	WBGene00000959
WBGene00000960	ENSG00000136267	WBGene00000960
WBGene00000962	ENSG00000197102	WBGene00000962
WBGene00000963	ENSG00000147647	WBGene00000963
WBGene00000964	ENSG00000147647	WBGene00000964
WBGene00000966	ENSG00000025423	WBGene00000966
WBGene00000967	ENSG00000170786	WBGene00000967
WBGene00000970	ENSG00000119471	WBGene00000970
WBGene00000971	ENSG00000186153	WBGene00000971
WBGene00000972	ENSG00000186153	WBGene00000972
WBGene00000973	ENSG00000157379	WBGene00000973
WBGene00000974	ENSG00000204228	WBGene00000974
WBGene00000976	ENSG00000157326	WBGene00000976
WBGene00000979	ENSG00000025423	WBGene00000979
WBGene00000981	ENSG00000119471	WBGene00000981
WBGene00000982	ENSG00000170786	WBGene00000982
WBGene00000983	ENSG00000025423	WBGene00000983
WBGene00000984	ENSG00000169738	WBGene00000984
WBGene00000985	ENSG00000072042	WBGene00000985
WBGene00000988	ENSG00000204228	WBGene00000988
WBGene00000989	ENSG00000157379	WBGene00000989
WBGene00000991	ENSG00000133835	WBGene00000991
WBGene00000993	ENSG00000109016	WBGene00000993
WBGene00000996	ENSG00000178537	WBGene00000996
WBGene00001001	ENSG00000083520	WBGene00001001
WBGene00001005	ENSG00000264364	WBGene00001005
WBGene00001006	ENSG00000150672	WBGene00001006
WBGene00001007	ENSG00000135720	WBGene00001007
WBGene00001016	ENSG00000138346	WBGene00001016
WBGene00001018	ENSG00000175203	WBGene00001018
WBGene00001019	ENSG00000148719	WBGene00001019
WBGene00001020	ENSG00000059769	WBGene00001020
WBGene00001025	ENSG00000102580	WBGene00001025
WBGene00001026	ENSG00000116138	WBGene00001026
WBGene00001027	ENSG00000007923	WBGene00001027
WBGene00001029	ENSG00000105821	WBGene00001029
WBGene00001030	ENSG00000140403	WBGene00001030
WBGene00001031	ENSG00000162616	WBGene00001031
WBGene00001033	ENSG00000100209	WBGene00001033
WBGene00001035	ENSG00000168724	WBGene00001035
WBGene00001037	ENSG00000069345	WBGene00001037
WBGene00001038	ENSG00000090520	WBGene00001038
WBGene00001039	ENSG00000205981	WBGene00001039
WBGene00001041	ENSG00000213551	WBGene00001041
WBGene00001042	ENSG00000105993	WBGene00001042
WBGene00001045	ENSG00000077232	WBGene00001045
WBGene00001046	ENSG00000102580	WBGene00001046
WBGene00001047	ENSG00000025796	WBGene00001047
WBGene00001048	ENSG00000126698	WBGene00001048
WBGene00001050	ENSG00000204348	WBGene00001050
WBGene00001051	ENSG00000173207	WBGene00001051
WBGene00001052	ENSG00000274286	WBGene00001052
WBGene00001053	ENSG00000151577	WBGene00001053
WBGene00001054	ENSG00000175497	WBGene00001054
WBGene00001055	ENSG00000197635	WBGene00001055
WBGene00001056	ENSG00000074603	WBGene00001056
WBGene00001058	ENSG00000164062	WBGene00001058
WBGene00001073	ENSG00000139921	WBGene00001073
WBGene00001077	ENSG00000122884	WBGene00001077
WBGene00001078	ENSG00000173852	WBGene00001078
WBGene00001082	ENSG00000161203	WBGene00001082
WBGene00001089	ENSG00000138081	WBGene00001089
WBGene00001090	ENSG00000107201	WBGene00001090
WBGene00001092	ENSG00000117505	WBGene00001092
WBGene00001093	ENSG00000087470	WBGene00001093
WBGene00001094	ENSG00000115866	WBGene00001094
WBGene00001095	ENSG00000117593	WBGene00001095
WBGene00001101	ENSG00000004975	WBGene00001101
WBGene00001102	ENSG00000004975	WBGene00001102
WBGene00001115	ENSG00000138101	WBGene00001115
WBGene00001117	ENSG00000196659	WBGene00001117
WBGene00001118	ENSG00000157796	WBGene00001118
WBGene00001119	ENSG00000103351	WBGene00001119
WBGene00001122	ENSG00000118096	WBGene00001122
WBGene00001129	ENSG00000105948	WBGene00001129
WBGene00001130	ENSG00000106976	WBGene00001130
WBGene00001134	ENSG00000198836	WBGene00001134
WBGene00001135	ENSG00000104888	WBGene00001135
WBGene00001137	ENSG00000105409	WBGene00001137
WBGene00001149	ENSG00000060982	WBGene00001149
WBGene00001150	ENSG00000084754	WBGene00001150
WBGene00001151	ENSG00000134463	WBGene00001151
WBGene00001153	ENSG00000198721	WBGene00001153
WBGene00001154	ENSG00000148090	WBGene00001154
WBGene00001155	ENSG00000127884	WBGene00001155
WBGene00001160	ENSG00000103319	WBGene00001160
WBGene00001166	ENSG00000108883	WBGene00001166
WBGene00001167	ENSG00000167658	WBGene00001167
WBGene00001172	ENSG00000125851	WBGene00001172
WBGene00001173	ENSG00000138669	WBGene00001173
WBGene00001177	ENSG00000101333	WBGene00001177
WBGene00001179	ENSG00000182732	WBGene00001179
WBGene00001184	ENSG00000068078	WBGene00001184
WBGene00001187	ENSG00000157388	WBGene00001187
WBGene00001188	ENSG00000002745	WBGene00001188
WBGene00001189	ENSG00000109472	WBGene00001189
WBGene00001196	ENSG00000088256	WBGene00001196
WBGene00001202	ENSG00000129159	WBGene00001202
WBGene00001208	ENSG00000187079	WBGene00001208
WBGene00001209	ENSG00000107581	WBGene00001209
WBGene00001224	ENSG00000127527	WBGene00001224
WBGene00001226	ENSG00000184110	WBGene00001226
WBGene00001227	ENSG00000100353	WBGene00001227
WBGene00001228	ENSG00000104408	WBGene00001228
WBGene00001229	ENSG00000175390	WBGene00001229
WBGene00001230	ENSG00000130811	WBGene00001230
WBGene00001231	ENSG00000147677	WBGene00001231
WBGene00001232	ENSG00000084623	WBGene00001232
WBGene00001233	ENSG00000178982	WBGene00001233
WBGene00001234	ENSG00000242372	WBGene00001234
WBGene00001236	ENSG00000154582	WBGene00001236
WBGene00001241	ENSG00000170522	WBGene00001241
WBGene00001248	ENSG00000125746	WBGene00001248
WBGene00001258	ENSG00000021776	WBGene00001258
WBGene00001259	ENSG00000109111	WBGene00001259
WBGene00001262	ENSG00000127948	WBGene00001262
WBGene00001263	ENSG00000134871	WBGene00001263
WBGene00001303	ENSG00000132432	WBGene00001303
WBGene00001328	ENSG00000130702	WBGene00001328
WBGene00001330	ENSG00000131037	WBGene00001330
WBGene00001331	ENSG00000136240	WBGene00001331
WBGene00001332	ENSG00000104626	WBGene00001332
WBGene00001333	ENSG00000147065	WBGene00001333
WBGene00001334	ENSG00000086619	WBGene00001334
WBGene00001335	ENSG00000148341	WBGene00001335
WBGene00001336	ENSG00000172053	WBGene00001336
WBGene00001338	ENSG00000103356	WBGene00001338
WBGene00001340	ENSG00000048740	WBGene00001340
WBGene00001352	ENSG00000083642	WBGene00001352
WBGene00001358	ENSG00000213465	WBGene00001358
WBGene00001366	ENSG00000146192	WBGene00001366
WBGene00001368	ENSG00000162374	WBGene00001368
WBGene00001377	ENSG00000104313	WBGene00001377
WBGene00001395	ENSG00000134824	WBGene00001395
WBGene00001396	ENSG00000134824	WBGene00001396
WBGene00001403	ENSG00000077942	WBGene00001403
WBGene00001404	ENSG00000130957	WBGene00001404
WBGene00001405	ENSG00000084073	WBGene00001405
WBGene00001406	ENSG00000173653	WBGene00001406
WBGene00001411	ENSG00000145780	WBGene00001411
WBGene00001414	ENSG00000135636	WBGene00001414
WBGene00001423	ENSG00000105202	WBGene00001423
WBGene00001425	ENSG00000214253	WBGene00001425
WBGene00001426	ENSG00000173486	WBGene00001426
WBGene00001428	ENSG00000122642	WBGene00001428
WBGene00001429	ENSG00000122642	WBGene00001429
WBGene00001430	ENSG00000122642	WBGene00001430
WBGene00001431	ENSG00000004478	WBGene00001431
WBGene00001443	ENSG00000177731	WBGene00001443
WBGene00001475	ENSG00000075275	WBGene00001475
WBGene00001476	ENSG00000131781	WBGene00001476
WBGene00001477	ENSG00000131781	WBGene00001477
WBGene00001478	ENSG00000131781	WBGene00001478
WBGene00001480	ENSG00000131781	WBGene00001480
WBGene00001485	ENSG00000188566	WBGene00001485
WBGene00001485	ENSG00000283590	WBGene00001485
WBGene00001487	ENSG00000151422	WBGene00001487
WBGene00001488	ENSG00000079819	WBGene00001488
WBGene00001497	ENSG00000179115	WBGene00001497
WBGene00001498	ENSG00000116120	WBGene00001498
WBGene00001499	ENSG00000174013	WBGene00001499
WBGene00001502	ENSG00000164924	WBGene00001502
WBGene00001503	ENSG00000091483	WBGene00001503
WBGene00001508	ENSG00000033170	WBGene00001508
WBGene00001509	ENSG00000116688	WBGene00001509
WBGene00001510	ENSG00000105325	WBGene00001510
WBGene00001512	ENSG00000166206	WBGene00001512
WBGene00001513	ENSG00000082068	WBGene00001513
WBGene00001515	ENSG00000185989	WBGene00001515
WBGene00001519	ENSG00000168539	WBGene00001519
WBGene00001520	ENSG00000158864	WBGene00001520
WBGene00001522	ENSG00000129151	WBGene00001522
WBGene00001523	ENSG00000185973	WBGene00001523
WBGene00001526	ENSG00000115694	WBGene00001526
WBGene00001527	ENSG00000001084	WBGene00001527
WBGene00001552	ENSG00000061918	WBGene00001552
WBGene00001554	ENSG00000061918	WBGene00001554
WBGene00001555	ENSG00000061918	WBGene00001555
WBGene00001556	ENSG00000061918	WBGene00001556
WBGene00001557	ENSG00000061918	WBGene00001557
WBGene00001558	ENSG00000203879	WBGene00001558
WBGene00001577	ENSG00000124772	WBGene00001577
WBGene00001579	ENSG00000273749	WBGene00001579
WBGene00001580	ENSG00000061676	WBGene00001580
WBGene00001582	ENSG00000160972	WBGene00001582
WBGene00001585	ENSG00000127337	WBGene00001585
WBGene00001590	ENSG00000144182	WBGene00001590
WBGene00001591	ENSG00000145888	WBGene00001591
WBGene00001592	ENSG00000145451	WBGene00001592
WBGene00001593	ENSG00000145888	WBGene00001593
WBGene00001602	ENSG00000135821	WBGene00001602
WBGene00001612	ENSG00000125675	WBGene00001612
WBGene00001613	ENSG00000125675	WBGene00001613
WBGene00001614	ENSG00000164418	WBGene00001614
WBGene00001615	ENSG00000164418	WBGene00001615
WBGene00001616	ENSG00000171189	WBGene00001616
WBGene00001620	ENSG00000110436	WBGene00001620
WBGene00001623	ENSG00000079215	WBGene00001623
WBGene00001626	ENSG00000140297	WBGene00001626
WBGene00001627	ENSG00000152127	WBGene00001627
WBGene00001628	ENSG00000141429	WBGene00001628
WBGene00001629	ENSG00000143641	WBGene00001629
WBGene00001632	ENSG00000109586	WBGene00001632
WBGene00001635	ENSG00000164574	WBGene00001635
WBGene00001636	ENSG00000178234	WBGene00001636
WBGene00001638	ENSG00000131446	WBGene00001638
WBGene00001639	ENSG00000131446	WBGene00001639
WBGene00001640	ENSG00000140297	WBGene00001640
WBGene00001641	ENSG00000140297	WBGene00001641
WBGene00001642	ENSG00000140297	WBGene00001642
WBGene00001643	ENSG00000140297	WBGene00001643
WBGene00001644	ENSG00000140297	WBGene00001644
WBGene00001645	ENSG00000168282	WBGene00001645
WBGene00001646	ENSG00000100522	WBGene00001646
WBGene00001647	ENSG00000100522	WBGene00001647
WBGene00001648	ENSG00000087258	WBGene00001648
WBGene00001650	ENSG00000163638	WBGene00001650
WBGene00001651	ENSG00000134160	WBGene00001651
WBGene00001660	ENSG00000038532	WBGene00001660
WBGene00001661	ENSG00000198522	WBGene00001661
WBGene00001662	ENSG00000100347	WBGene00001662
WBGene00001674	ENSG00000146535	WBGene00001674
WBGene00001678	ENSG00000127955	WBGene00001678
WBGene00001679	ENSG00000078369	WBGene00001679
WBGene00001680	ENSG00000069966	WBGene00001680
WBGene00001683	ENSG00000111640	WBGene00001683
WBGene00001684	ENSG00000111640	WBGene00001684
WBGene00001685	ENSG00000111640	WBGene00001685
WBGene00001686	ENSG00000111640	WBGene00001686
WBGene00001687	ENSG00000076716	WBGene00001687
WBGene00001708	ENSG00000198873	WBGene00001708
WBGene00001709	ENSG00000100077	WBGene00001709
WBGene00001740	ENSG00000043514	WBGene00001740
WBGene00001743	ENSG00000008256	WBGene00001743
WBGene00001744	ENSG00000106105	WBGene00001744
WBGene00001745	ENSG00000087460	WBGene00001745
WBGene00001746	ENSG00000082701	WBGene00001746
WBGene00001747	ENSG00000213639	WBGene00001747
WBGene00001748	ENSG00000172531	WBGene00001748
WBGene00001750	ENSG00000163106	WBGene00001750
WBGene00001751	ENSG00000163106	WBGene00001751
WBGene00001752	ENSG00000163106	WBGene00001752
WBGene00001753	ENSG00000163106	WBGene00001753
WBGene00001754	ENSG00000163106	WBGene00001754
WBGene00001755	ENSG00000163106	WBGene00001755
WBGene00001756	ENSG00000163106	WBGene00001756
WBGene00001757	ENSG00000163106	WBGene00001757
WBGene00001759	ENSG00000163106	WBGene00001759
WBGene00001760	ENSG00000163106	WBGene00001760
WBGene00001761	ENSG00000163106	WBGene00001761
WBGene00001762	ENSG00000163106	WBGene00001762
WBGene00001763	ENSG00000163106	WBGene00001763
WBGene00001764	ENSG00000163106	WBGene00001764
WBGene00001765	ENSG00000163106	WBGene00001765
WBGene00001766	ENSG00000163106	WBGene00001766
WBGene00001767	ENSG00000163106	WBGene00001767
WBGene00001768	ENSG00000163106	WBGene00001768
WBGene00001769	ENSG00000163106	WBGene00001769
WBGene00001770	ENSG00000163106	WBGene00001770
WBGene00001772	ENSG00000163106	WBGene00001772
WBGene00001774	ENSG00000163106	WBGene00001774
WBGene00001775	ENSG00000163106	WBGene00001775
WBGene00001776	ENSG00000163106	WBGene00001776
WBGene00001777	ENSG00000163106	WBGene00001777
WBGene00001778	ENSG00000163106	WBGene00001778
WBGene00001779	ENSG00000163106	WBGene00001779
WBGene00001780	ENSG00000163106	WBGene00001780
WBGene00001781	ENSG00000163106	WBGene00001781
WBGene00001782	ENSG00000163106	WBGene00001782
WBGene00001783	ENSG00000163106	WBGene00001783
WBGene00001784	ENSG00000163106	WBGene00001784
WBGene00001785	ENSG00000163106	WBGene00001785
WBGene00001786	ENSG00000163106	WBGene00001786
WBGene00001787	ENSG00000163106	WBGene00001787
WBGene00001790	ENSG00000100577	WBGene00001790
WBGene00001791	ENSG00000100577	WBGene00001791
WBGene00001792	ENSG00000148834	WBGene00001792
WBGene00001793	ENSG00000104812	WBGene00001793
WBGene00001794	ENSG00000183044	WBGene00001794
WBGene00001808	ENSG00000204392	WBGene00001808
WBGene00001811	ENSG00000135776	WBGene00001811
WBGene00001812	ENSG00000150967	WBGene00001812
WBGene00001813	ENSG00000135776	WBGene00001813
WBGene00001814	ENSG00000150967	WBGene00001814
WBGene00001815	ENSG00000115657	WBGene00001815
WBGene00001816	ENSG00000197150	WBGene00001816
WBGene00001817	ENSG00000150967	WBGene00001817
WBGene00001818	ENSG00000150967	WBGene00001818
WBGene00001819	ENSG00000150967	WBGene00001819
WBGene00001823	ENSG00000125877	WBGene00001823
WBGene00001827	ENSG00000172534	WBGene00001827
WBGene00001834	ENSG00000196591	WBGene00001834
WBGene00001836	ENSG00000116478	WBGene00001836
WBGene00001840	ENSG00000123136	WBGene00001840
WBGene00001843	ENSG00000113924	WBGene00001843
WBGene00001844	ENSG00000167861	WBGene00001844
WBGene00001860	ENSG00000072501	WBGene00001860
WBGene00001863	ENSG00000143341	WBGene00001863
WBGene00001872	ENSG00000057468	WBGene00001872
WBGene00001876	ENSG00000197153	WBGene00001876
WBGene00001877	ENSG00000184260	WBGene00001877
WBGene00001878	ENSG00000124635	WBGene00001878
WBGene00001879	ENSG00000197837	WBGene00001879
WBGene00001880	ENSG00000197153	WBGene00001880
WBGene00001881	ENSG00000184260	WBGene00001881
WBGene00001882	ENSG00000124635	WBGene00001882
WBGene00001883	ENSG00000197153	WBGene00001883
WBGene00001885	ENSG00000124635	WBGene00001885
WBGene00001886	ENSG00000184260	WBGene00001886
WBGene00001887	ENSG00000197153	WBGene00001887
WBGene00001888	ENSG00000276180	WBGene00001888
WBGene00001889	ENSG00000124635	WBGene00001889
WBGene00001890	ENSG00000184260	WBGene00001890
WBGene00001891	ENSG00000197153	WBGene00001891
WBGene00001892	ENSG00000273542	WBGene00001892
WBGene00001893	ENSG00000184260	WBGene00001893
WBGene00001894	ENSG00000124635	WBGene00001894
WBGene00001895	ENSG00000184260	WBGene00001895
WBGene00001896	ENSG00000124635	WBGene00001896
WBGene00001899	ENSG00000197153	WBGene00001899
WBGene00001901	ENSG00000197153	WBGene00001901
WBGene00001903	ENSG00000124635	WBGene00001903
WBGene00001904	ENSG00000184260	WBGene00001904
WBGene00001905	ENSG00000196747	WBGene00001905
WBGene00001906	ENSG00000197153	WBGene00001906
WBGene00001907	ENSG00000184260	WBGene00001907
WBGene00001908	ENSG00000124635	WBGene00001908
WBGene00001909	ENSG00000184260	WBGene00001909
WBGene00001912	ENSG00000197061	WBGene00001912
WBGene00001915	ENSG00000124635	WBGene00001915
WBGene00001916	ENSG00000197153	WBGene00001916
WBGene00001917	ENSG00000184260	WBGene00001917
WBGene00001918	ENSG00000124635	WBGene00001918
WBGene00001919	ENSG00000197153	WBGene00001919
WBGene00001920	ENSG00000158406	WBGene00001920
WBGene00001921	ENSG00000184260	WBGene00001921
WBGene00001922	ENSG00000124635	WBGene00001922
WBGene00001923	ENSG00000197153	WBGene00001923
WBGene00001925	ENSG00000184260	WBGene00001925
WBGene00001926	ENSG00000124635	WBGene00001926
WBGene00001927	ENSG00000184260	WBGene00001927
WBGene00001928	ENSG00000124635	WBGene00001928
WBGene00001929	ENSG00000197153	WBGene00001929
WBGene00001930	ENSG00000276966	WBGene00001930
WBGene00001931	ENSG00000184260	WBGene00001931
WBGene00001932	ENSG00000124635	WBGene00001932
WBGene00001933	ENSG00000197153	WBGene00001933
WBGene00001934	ENSG00000277157	WBGene00001934
WBGene00001935	ENSG00000184260	WBGene00001935
WBGene00001936	ENSG00000124635	WBGene00001936
WBGene00001937	ENSG00000197153	WBGene00001937
WBGene00001938	ENSG00000270882	WBGene00001938
WBGene00001939	ENSG00000184260	WBGene00001939
WBGene00001940	ENSG00000124635	WBGene00001940
WBGene00001941	ENSG00000278637	WBGene00001941
WBGene00001942	ENSG00000184260	WBGene00001942
WBGene00001945	ENSG00000188375	WBGene00001945
WBGene00001946	ENSG00000188375	WBGene00001946
WBGene00001972	ENSG00000164104	WBGene00001972
WBGene00001973	ENSG00000149136	WBGene00001973
WBGene00001974	ENSG00000149136	WBGene00001974
WBGene00001978	ENSG00000066032	WBGene00001978
WBGene00001979	ENSG00000168036	WBGene00001979
WBGene00001983	ENSG00000006744	WBGene00001983
WBGene00001993	ENSG00000158104	WBGene00001993
WBGene00002001	ENSG00000170445	WBGene00002001
WBGene00002003	ENSG00000138604	WBGene00002003
WBGene00002005	ENSG00000109971	WBGene00002005
WBGene00002007	ENSG00000044574	WBGene00002007
WBGene00002008	ENSG00000044574	WBGene00002008
WBGene00002010	ENSG00000113013	WBGene00002010
WBGene00002025	ENSG00000144381	WBGene00002025
WBGene00002028	ENSG00000166507	WBGene00002028
WBGene00002028	ENSG00000272916	WBGene00002028
WBGene00002031	ENSG00000171004	WBGene00002031
WBGene00002035	ENSG00000157483	WBGene00002035
WBGene00002036	ENSG00000197535	WBGene00002036
WBGene00002038	ENSG00000176658	WBGene00002038
WBGene00002039	ENSG00000169994	WBGene00002039
WBGene00002041	ENSG00000196586	WBGene00002041
WBGene00002042	ENSG00000136273	WBGene00002042
WBGene00002043	ENSG00000139624	WBGene00002043
WBGene00002044	ENSG00000139624	WBGene00002044
WBGene00002045	ENSG00000134717	WBGene00002045
WBGene00002050	ENSG00000176619	WBGene00002050
WBGene00002051	ENSG00000176619	WBGene00002051
WBGene00002052	ENSG00000176619	WBGene00002052
WBGene00002053	ENSG00000176619	WBGene00002053
WBGene00002054	ENSG00000176619	WBGene00002054
WBGene00002055	ENSG00000176619	WBGene00002055
WBGene00002056	ENSG00000176619	WBGene00002056
WBGene00002057	ENSG00000176619	WBGene00002057
WBGene00002058	ENSG00000176619	WBGene00002058
WBGene00002061	ENSG00000151247	WBGene00002061
WBGene00002062	ENSG00000135930	WBGene00002062
WBGene00002064	ENSG00000253626	WBGene00002064
WBGene00002065	ENSG00000253626	WBGene00002065
WBGene00002067	ENSG00000176619	WBGene00002067
WBGene00002070	ENSG00000074695	WBGene00002070
WBGene00002071	ENSG00000114988	WBGene00002071
WBGene00002074	ENSG00000186432	WBGene00002074
WBGene00002075	ENSG00000108424	WBGene00002075
WBGene00002076	ENSG00000083312	WBGene00002076
WBGene00002077	ENSG00000065150	WBGene00002077
WBGene00002078	ENSG00000082898	WBGene00002078
WBGene00002080	ENSG00000184575	WBGene00002080
WBGene00002081	ENSG00000091409	WBGene00002081
WBGene00002083	ENSG00000156976	WBGene00002083
WBGene00002146	ENSG00000068383	WBGene00002146
WBGene00002147	ENSG00000178607	WBGene00002147
WBGene00002149	ENSG00000123700	WBGene00002149
WBGene00002150	ENSG00000184185	WBGene00002150
WBGene00002152	ENSG00000196305	WBGene00002152
WBGene00002153	ENSG00000067704	WBGene00002153
WBGene00002162	ENSG00000169021	WBGene00002162
WBGene00002169	ENSG00000102038	WBGene00002169
WBGene00002173	ENSG00000150995	WBGene00002173
WBGene00002178	ENSG00000107643	WBGene00002178
WBGene00002181	ENSG00000011201	WBGene00002181
WBGene00002182	ENSG00000075945	WBGene00002182
WBGene00002183	ENSG00000075239	WBGene00002183
WBGene00002184	ENSG00000146021	WBGene00002184
WBGene00002185	ENSG00000114648	WBGene00002185
WBGene00002189	ENSG00000142875	WBGene00002189
WBGene00002190	ENSG00000188191	WBGene00002190
WBGene00002191	ENSG00000101266	WBGene00002191
WBGene00002195	ENSG00000134853	WBGene00002195
WBGene00002196	ENSG00000204435	WBGene00002196
WBGene00002198	ENSG00000151422	WBGene00002198
WBGene00002201	ENSG00000160551	WBGene00002201
WBGene00002202	ENSG00000180138	WBGene00002202
WBGene00002203	ENSG00000141551	WBGene00002203
WBGene00002213	ENSG00000169398	WBGene00002213
WBGene00002215	ENSG00000126214	WBGene00002215
WBGene00002217	ENSG00000137177	WBGene00002217
WBGene00002218	ENSG00000223519	WBGene00002218
WBGene00002219	ENSG00000142945	WBGene00002219
WBGene00002222	ENSG00000101350	WBGene00002222
WBGene00002223	ENSG00000139116	WBGene00002223
WBGene00002224	ENSG00000196169	WBGene00002224
WBGene00002229	ENSG00000090889	WBGene00002229
WBGene00002230	ENSG00000131437	WBGene00002230
WBGene00002232	ENSG00000140564	WBGene00002232
WBGene00002233	ENSG00000185760	WBGene00002233
WBGene00002235	ENSG00000053918	WBGene00002235
WBGene00002238	ENSG00000065427	WBGene00002238
WBGene00002243	ENSG00000091129	WBGene00002243
WBGene00002244	ENSG00000215301	WBGene00002244
WBGene00002245	ENSG00000168214	WBGene00002245
WBGene00002247	ENSG00000172037	WBGene00002247
WBGene00002248	ENSG00000196569	WBGene00002248
WBGene00002249	ENSG00000215440	WBGene00002249
WBGene00002251	ENSG00000117114	WBGene00002251
WBGene00002257	ENSG00000170323	WBGene00002257
WBGene00002258	ENSG00000170323	WBGene00002258
WBGene00002259	ENSG00000170323	WBGene00002259
WBGene00002260	ENSG00000170323	WBGene00002260
WBGene00002261	ENSG00000169744	WBGene00002261
WBGene00002262	ENSG00000134333	WBGene00002262
WBGene00002280	ENSG00000134871	WBGene00002280
WBGene00002324	ENSG00000155868	WBGene00002324
WBGene00002335	ENSG00000133703	WBGene00002335
WBGene00002344	ENSG00000131508	WBGene00002344
WBGene00002348	ENSG00000078814	WBGene00002348
WBGene00002363	ENSG00000113575	WBGene00002363
WBGene00002497	ENSG00000106397	WBGene00002497
WBGene00002632	ENSG00000180900	WBGene00002632
WBGene00002637	ENSG00000111642	WBGene00002637
WBGene00002694	ENSG00000134318	WBGene00002694
WBGene00002845	ENSG00000125107	WBGene00002845
WBGene00002855	ENSG00000171503	WBGene00002855
WBGene00002879	ENSG00000004455	WBGene00002879
WBGene00002889	ENSG00000139697	WBGene00002889
WBGene00002891	ENSG00000149084	WBGene00002891
WBGene00002978	ENSG00000140416	WBGene00002978
WBGene00002980	ENSG00000139112	WBGene00002980
WBGene00002981	ENSG00000101460	WBGene00002981
WBGene00002985	ENSG00000105486	WBGene00002985
WBGene00002988	ENSG00000136944	WBGene00002988
WBGene00002989	ENSG00000016082	WBGene00002989
WBGene00002991	ENSG00000147044	WBGene00002991
WBGene00002996	ENSG00000104863	WBGene00002996
WBGene00002998	ENSG00000183814	WBGene00002998
WBGene00003007	ENSG00000163785	WBGene00003007
WBGene00003009	ENSG00000072803	WBGene00003009
WBGene00003020	ENSG00000080839	WBGene00003020
WBGene00003025	ENSG00000057935	WBGene00003025
WBGene00003026	ENSG00000206557	WBGene00003026
WBGene00003030	ENSG00000157764	WBGene00003030
WBGene00003036	ENSG00000162521	WBGene00003036
WBGene00003041	ENSG00000100395	WBGene00003041
WBGene00003047	ENSG00000007168	WBGene00003047
WBGene00003048	ENSG00000087095	WBGene00003048
WBGene00003052	ENSG00000113368	WBGene00003052
WBGene00003059	ENSG00000129460	WBGene00003059
WBGene00003061	ENSG00000164258	WBGene00003061
WBGene00003063	ENSG00000100029	WBGene00003063
WBGene00003064	ENSG00000169599	WBGene00003064
WBGene00003071	ENSG00000081479	WBGene00003071
WBGene00003073	ENSG00000133706	WBGene00003073
WBGene00003074	ENSG00000011376	WBGene00003074
WBGene00003076	ENSG00000175324	WBGene00003076
WBGene00003077	ENSG00000170860	WBGene00003077
WBGene00003079	ENSG00000106355	WBGene00003079
WBGene00003080	ENSG00000164167	WBGene00003080
WBGene00003081	ENSG00000130332	WBGene00003081
WBGene00003082	ENSG00000128534	WBGene00003082
WBGene00003086	ENSG00000173548	WBGene00003086
WBGene00003112	ENSG00000180660	WBGene00003112
WBGene00003119	ENSG00000143748	WBGene00003119
WBGene00003123	ENSG00000111196	WBGene00003123
WBGene00003129	ENSG00000164024	WBGene00003129
WBGene00003136	ENSG00000129933	WBGene00003136
WBGene00003143	ENSG00000054690	WBGene00003143
WBGene00003148	ENSG00000107223	WBGene00003148
WBGene00003150	ENSG00000127334	WBGene00003150
WBGene00003153	ENSG00000067842	WBGene00003153
WBGene00003154	ENSG00000073111	WBGene00003154
WBGene00003156	ENSG00000104738	WBGene00003156
WBGene00003157	ENSG00000100297	WBGene00003157
WBGene00003159	ENSG00000166508	WBGene00003159
WBGene00003161	ENSG00000164109	WBGene00003161
WBGene00003162	ENSG00000146701	WBGene00003162
WBGene00003164	ENSG00000133997	WBGene00003164
WBGene00003168	ENSG00000166828	WBGene00003168
WBGene00003171	ENSG00000137285	WBGene00003171
WBGene00003174	ENSG00000166828	WBGene00003174
WBGene00003175	ENSG00000152086	WBGene00003175
WBGene00003177	ENSG00000132004	WBGene00003177
WBGene00003185	ENSG00000076984	WBGene00003185
WBGene00003186	ENSG00000169032	WBGene00003186
WBGene00003214	ENSG00000176974	WBGene00003214
WBGene00003232	ENSG00000198822	WBGene00003232
WBGene00003246	ENSG00000116729	WBGene00003246
WBGene00003253	ENSG00000123989	WBGene00003253
WBGene00003254	ENSG00000198018	WBGene00003254
WBGene00003369	ENSG00000180209	WBGene00003369
WBGene00003370	ENSG00000180209	WBGene00003370
WBGene00003372	ENSG00000118680	WBGene00003372
WBGene00003375	ENSG00000175183	WBGene00003375
WBGene00003376	ENSG00000184058	WBGene00003376
WBGene00003389	ENSG00000140829	WBGene00003389
WBGene00003390	ENSG00000131876	WBGene00003390
WBGene00003392	ENSG00000204560	WBGene00003392
WBGene00003393	ENSG00000067596	WBGene00003393
WBGene00003400	ENSG00000196730	WBGene00003400
WBGene00003401	ENSG00000100030	WBGene00003401
WBGene00003405	ENSG00000020922	WBGene00003405
WBGene00003406	ENSG00000185787	WBGene00003406
WBGene00003407	ENSG00000103222	WBGene00003407
WBGene00003408	ENSG00000103222	WBGene00003408
WBGene00003409	ENSG00000108846	WBGene00003409
WBGene00003410	ENSG00000108846	WBGene00003410
WBGene00003411	ENSG00000114770	WBGene00003411
WBGene00003412	ENSG00000125257	WBGene00003412
WBGene00003413	ENSG00000108846	WBGene00003413
WBGene00003417	ENSG00000113456	WBGene00003417
WBGene00003421	ENSG00000204410	WBGene00003421
WBGene00003422	ENSG00000116062	WBGene00003422
WBGene00003475	ENSG00000171100	WBGene00003475
WBGene00003477	ENSG00000133812	WBGene00003477
WBGene00003478	ENSG00000102043	WBGene00003478
WBGene00003479	ENSG00000104643	WBGene00003479
WBGene00003485	ENSG00000176619	WBGene00003485
WBGene00003504	ENSG00000187609	WBGene00003504
WBGene00003514	ENSG00000078814	WBGene00003514
WBGene00003515	ENSG00000078814	WBGene00003515
WBGene00003517	ENSG00000007216	WBGene00003517
WBGene00003518	ENSG00000158296	WBGene00003518
WBGene00003519	ENSG00000007216	WBGene00003519
WBGene00003555	ENSG00000038295	WBGene00003555
WBGene00003558	ENSG00000102452	WBGene00003558
WBGene00003563	ENSG00000107130	WBGene00003563
WBGene00003566	ENSG00000183023	WBGene00003566
WBGene00003567	ENSG00000100678	WBGene00003567
WBGene00003569	ENSG00000074621	WBGene00003569
WBGene00003570	ENSG00000074621	WBGene00003570
WBGene00003571	ENSG00000089060	WBGene00003571
WBGene00003572	ENSG00000089060	WBGene00003572
WBGene00003573	ENSG00000089060	WBGene00003573
WBGene00003574	ENSG00000089060	WBGene00003574
WBGene00003575	ENSG00000089060	WBGene00003575
WBGene00003579	ENSG00000165609	WBGene00003579
WBGene00003580	ENSG00000167799	WBGene00003580
WBGene00003581	ENSG00000164978	WBGene00003581
WBGene00003583	ENSG00000170502	WBGene00003583
WBGene00003584	ENSG00000213965	WBGene00003584
WBGene00003586	ENSG00000166321	WBGene00003586
WBGene00003587	ENSG00000129559	WBGene00003587
WBGene00003588	ENSG00000104537	WBGene00003588
WBGene00003589	ENSG00000138279	WBGene00003589
WBGene00003596	ENSG00000134697	WBGene00003596
WBGene00003622	ENSG00000198963	WBGene00003622
WBGene00003654	ENSG00000164749	WBGene00003654
WBGene00003657	ENSG00000112333	WBGene00003657
WBGene00003733	ENSG00000198689	WBGene00003733
WBGene00003735	ENSG00000197818	WBGene00003735
WBGene00003772	ENSG00000155052	WBGene00003772
WBGene00003774	ENSG00000176884	WBGene00003774
WBGene00003775	ENSG00000105464	WBGene00003775
WBGene00003776	ENSG00000133026	WBGene00003776
WBGene00003778	ENSG00000112992	WBGene00003778
WBGene00003788	ENSG00000125450	WBGene00003788
WBGene00003794	ENSG00000113569	WBGene00003794
WBGene00003798	ENSG00000132182	WBGene00003798
WBGene00003799	ENSG00000102900	WBGene00003799
WBGene00003803	ENSG00000101146	WBGene00003803
WBGene00003804	ENSG00000085415	WBGene00003804
WBGene00003806	ENSG00000157020	WBGene00003806
WBGene00003807	ENSG00000137252	WBGene00003807
WBGene00003808	ENSG00000137252	WBGene00003808
WBGene00003815	ENSG00000134440	WBGene00003815
WBGene00003816	ENSG00000070669	WBGene00003816
WBGene00003818	ENSG00000073969	WBGene00003818
WBGene00003825	ENSG00000111596	WBGene00003825
WBGene00003828	ENSG00000137976	WBGene00003828
WBGene00003829	ENSG00000090273	WBGene00003829
WBGene00003831	ENSG00000167792	WBGene00003831
WBGene00003834	ENSG00000162231	WBGene00003834
WBGene00003835	ENSG00000162231	WBGene00003835
WBGene00003844	ENSG00000115758	WBGene00003844
WBGene00003858	ENSG00000147162	WBGene00003858
WBGene00003870	ENSG00000136816	WBGene00003870
WBGene00003876	ENSG00000088386	WBGene00003876
WBGene00003877	ENSG00000088386	WBGene00003877
WBGene00003878	ENSG00000163406	WBGene00003878
WBGene00003883	ENSG00000138002	WBGene00003883
WBGene00003884	ENSG00000117245	WBGene00003884
WBGene00003885	ENSG00000032742	WBGene00003885
WBGene00003886	ENSG00000101052	WBGene00003886
WBGene00003892	ENSG00000138686	WBGene00003892
WBGene00003893	ENSG00000152583	WBGene00003893
WBGene00003898	ENSG00000151148	WBGene00003898
WBGene00003901	ENSG00000105568	WBGene00003901
WBGene00003902	ENSG00000070756	WBGene00003902
WBGene00003903	ENSG00000070756	WBGene00003903
WBGene00003904	ENSG00000100836	WBGene00003904
WBGene00003906	ENSG00000158006	WBGene00003906
WBGene00003907	ENSG00000158006	WBGene00003907
WBGene00003911	ENSG00000149269	WBGene00003911
WBGene00003914	ENSG00000141279	WBGene00003914
WBGene00003916	ENSG00000075413	WBGene00003916
WBGene00003919	ENSG00000118046	WBGene00003919
WBGene00003920	ENSG00000164924	WBGene00003920
WBGene00003921	ENSG00000178184	WBGene00003921
WBGene00003922	ENSG00000100902	WBGene00003922
WBGene00003923	ENSG00000106588	WBGene00003923
WBGene00003923	ENSG00000256646	WBGene00003923
WBGene00003924	ENSG00000041357	WBGene00003924
WBGene00003925	ENSG00000101182	WBGene00003925
WBGene00003926	ENSG00000143106	WBGene00003926
WBGene00003927	ENSG00000129084	WBGene00003927
WBGene00003928	ENSG00000100567	WBGene00003928
WBGene00003929	ENSG00000077943	WBGene00003929
WBGene00003930	ENSG00000150093	WBGene00003930
WBGene00003931	ENSG00000166333	WBGene00003931
WBGene00003932	ENSG00000197702	WBGene00003932
WBGene00003941	ENSG00000166869	WBGene00003941
WBGene00003949	ENSG00000277791	WBGene00003949
WBGene00003950	ENSG00000126067	WBGene00003950
WBGene00003951	ENSG00000100804	WBGene00003951
WBGene00003952	ENSG00000008018	WBGene00003952
WBGene00003954	ENSG00000120265	WBGene00003954
WBGene00003955	ENSG00000132646	WBGene00003955
WBGene00003961	ENSG00000059758	WBGene00003961
WBGene00003963	ENSG00000185624	WBGene00003963
WBGene00003964	ENSG00000167004	WBGene00003964
WBGene00003965	ENSG00000140992	WBGene00003965
WBGene00003966	ENSG00000156973	WBGene00003966
WBGene00003967	ENSG00000185345	WBGene00003967
WBGene00003969	ENSG00000086717	WBGene00003969
WBGene00003975	ENSG00000205155	WBGene00003975
WBGene00003980	ENSG00000183856	WBGene00003980
WBGene00003986	ENSG00000163053	WBGene00003986
WBGene00003995	ENSG00000085563	WBGene00003995
WBGene00004003	ENSG00000085563	WBGene00004003
WBGene00004014	ENSG00000167085	WBGene00004014
WBGene00004015	ENSG00000215021	WBGene00004015
WBGene00004016	ENSG00000100410	WBGene00004016
WBGene00004025	ENSG00000122884	WBGene00004025
WBGene00004028	ENSG00000140451	WBGene00004028
WBGene00004032	ENSG00000171132	WBGene00004032
WBGene00004033	ENSG00000154229	WBGene00004033
WBGene00004034	ENSG00000163558	WBGene00004034
WBGene00004035	ENSG00000118762	WBGene00004035
WBGene00004036	ENSG00000138193	WBGene00004036
WBGene00004038	ENSG00000124181	WBGene00004038
WBGene00004039	ENSG00000161714	WBGene00004039
WBGene00004040	ENSG00000075651	WBGene00004040
WBGene00004042	ENSG00000166851	WBGene00004042
WBGene00004043	ENSG00000166851	WBGene00004043
WBGene00004045	ENSG00000154822	WBGene00004045
WBGene00004047	ENSG00000076356	WBGene00004047
WBGene00004049	ENSG00000143799	WBGene00004049
WBGene00004055	ENSG00000112062	WBGene00004055
WBGene00004058	ENSG00000117528	WBGene00004058
WBGene00004059	ENSG00000117528	WBGene00004059
WBGene00004060	ENSG00000119688	WBGene00004060
WBGene00004063	ENSG00000017260	WBGene00004063
WBGene00004064	ENSG00000122512	WBGene00004064
WBGene00004075	ENSG00000103426	WBGene00004075
WBGene00004075	ENSG00000262246	WBGene00004075
WBGene00004085	ENSG00000149923	WBGene00004085
WBGene00004087	ENSG00000143398	WBGene00004087
WBGene00004088	ENSG00000276293	WBGene00004088
WBGene00004090	ENSG00000070785	WBGene00004090
WBGene00004091	ENSG00000198682	WBGene00004091
WBGene00004092	ENSG00000131238	WBGene00004092
WBGene00004101	ENSG00000185359	WBGene00004101
WBGene00004109	ENSG00000136738	WBGene00004109
WBGene00004131	ENSG00000183508	WBGene00004131
WBGene00004134	ENSG00000166268	WBGene00004134
WBGene00004151	ENSG00000125821	WBGene00004151
WBGene00004178	ENSG00000125207	WBGene00004178
WBGene00004179	ENSG00000125207	WBGene00004179
WBGene00004180	ENSG00000198056	WBGene00004180
WBGene00004181	ENSG00000146143	WBGene00004181
WBGene00004183	ENSG00000137193	WBGene00004183
WBGene00004184	ENSG00000112245	WBGene00004184
WBGene00004185	ENSG00000065268	WBGene00004185
WBGene00004187	ENSG00000174231	WBGene00004187
WBGene00004188	ENSG00000099995	WBGene00004188
WBGene00004190	ENSG00000162396	WBGene00004190
WBGene00004194	ENSG00000139197	WBGene00004194
WBGene00004197	ENSG00000108733	WBGene00004197
WBGene00004198	ENSG00000162928	WBGene00004198
WBGene00004204	ENSG00000080503	WBGene00004204
WBGene00004205	ENSG00000070495	WBGene00004205
WBGene00004206	ENSG00000157593	WBGene00004206
WBGene00004207	ENSG00000011304	WBGene00004207
WBGene00004208	ENSG00000185920	WBGene00004208
WBGene00004209	ENSG00000185920	WBGene00004209
WBGene00004210	ENSG00000185920	WBGene00004210
WBGene00004211	ENSG00000154309	WBGene00004211
WBGene00004213	ENSG00000088179	WBGene00004213
WBGene00004215	ENSG00000153707	WBGene00004215
WBGene00004233	ENSG00000182077	WBGene00004233
WBGene00004248	ENSG00000177192	WBGene00004248
WBGene00004254	ENSG00000158987	WBGene00004254
WBGene00004254	ENSG00000273217	WBGene00004254
WBGene00004255	ENSG00000091428	WBGene00004255
WBGene00004256	ENSG00000130508	WBGene00004256
WBGene00004257	ENSG00000130508	WBGene00004257
WBGene00004258	ENSG00000173599	WBGene00004258
WBGene00004259	ENSG00000084774	WBGene00004259
WBGene00004266	ENSG00000138069	WBGene00004266
WBGene00004267	ENSG00000152932	WBGene00004267
WBGene00004268	ENSG00000144566	WBGene00004268
WBGene00004269	ENSG00000175582	WBGene00004269
WBGene00004272	ENSG00000167461	WBGene00004272
WBGene00004273	ENSG00000084733	WBGene00004273
WBGene00004274	ENSG00000103769	WBGene00004274
WBGene00004277	ENSG00000099246	WBGene00004277
WBGene00004278	ENSG00000172780	WBGene00004278
WBGene00004279	ENSG00000080371	WBGene00004279
WBGene00004281	ENSG00000157869	WBGene00004281
WBGene00004282	ENSG00000137502	WBGene00004282
WBGene00004283	ENSG00000172007	WBGene00004283
WBGene00004284	ENSG00000111737	WBGene00004284
WBGene00004285	ENSG00000172794	WBGene00004285
WBGene00004286	ENSG00000155961	WBGene00004286
WBGene00004287	ENSG00000169750	WBGene00004287
WBGene00004297	ENSG00000051180	WBGene00004297
WBGene00004298	ENSG00000085999	WBGene00004298
WBGene00004302	ENSG00000132341	WBGene00004302
WBGene00004304	ENSG00000180198	WBGene00004304
WBGene00004305	ENSG00000102898	WBGene00004305
WBGene00004307	ENSG00000127314	WBGene00004307
WBGene00004308	ENSG00000125249	WBGene00004308
WBGene00004310	ENSG00000133818	WBGene00004310
WBGene00004311	ENSG00000158186	WBGene00004311
WBGene00004313	ENSG00000104093	WBGene00004313
WBGene00004314	ENSG00000091157	WBGene00004314
WBGene00004315	ENSG00000122965	WBGene00004315
WBGene00004316	ENSG00000089169	WBGene00004316
WBGene00004317	ENSG00000115839	WBGene00004317
WBGene00004319	ENSG00000117139	WBGene00004319
WBGene00004320	ENSG00000100387	WBGene00004320
WBGene00004321	ENSG00000117602	WBGene00004321
WBGene00004322	ENSG00000108469	WBGene00004322
WBGene00004338	ENSG00000049541	WBGene00004338
WBGene00004339	ENSG00000133119	WBGene00004339
WBGene00004341	ENSG00000144744	WBGene00004341
WBGene00004344	ENSG00000147509	WBGene00004344
WBGene00004345	ENSG00000147509	WBGene00004345
WBGene00004355	ENSG00000135829	WBGene00004355
WBGene00004356	ENSG00000141522	WBGene00004356
WBGene00004357	ENSG00000155366	WBGene00004357
WBGene00004358	ENSG00000112077	WBGene00004358
WBGene00004359	ENSG00000112077	WBGene00004359
WBGene00004360	ENSG00000182197	WBGene00004360
WBGene00004371	ENSG00000069188	WBGene00004371
WBGene00004373	ENSG00000110047	WBGene00004373
WBGene00004378	ENSG00000138246	WBGene00004378
WBGene00004381	ENSG00000138942	WBGene00004381
WBGene00004382	ENSG00000171865	WBGene00004382
WBGene00004383	ENSG00000104889	WBGene00004383
WBGene00004385	ENSG00000077312	WBGene00004385
WBGene00004386	ENSG00000125870	WBGene00004386
WBGene00004387	ENSG00000265241	WBGene00004387
WBGene00004389	ENSG00000179950	WBGene00004389
WBGene00004391	ENSG00000167325	WBGene00004391
WBGene00004392	ENSG00000171848	WBGene00004392
WBGene00004400	ENSG00000158315	WBGene00004400
WBGene00004402	ENSG00000129667	WBGene00004402
WBGene00004403	ENSG00000129667	WBGene00004403
WBGene00004405	ENSG00000116747	WBGene00004405
WBGene00004408	ENSG00000089157	WBGene00004408
WBGene00004411	ENSG00000148606	WBGene00004411
WBGene00004412	ENSG00000198755	WBGene00004412
WBGene00004413	ENSG00000161016	WBGene00004413
WBGene00004414	ENSG00000100316	WBGene00004414
WBGene00004415	ENSG00000174444	WBGene00004415
WBGene00004416	ENSG00000122406	WBGene00004416
WBGene00004417	ENSG00000089009	WBGene00004417
WBGene00004418	ENSG00000147604	WBGene00004418
WBGene00004420	ENSG00000163682	WBGene00004420
WBGene00004421	ENSG00000165496	WBGene00004421
WBGene00004422	ENSG00000142676	WBGene00004422
WBGene00004423	ENSG00000142676	WBGene00004423
WBGene00004424	ENSG00000197958	WBGene00004424
WBGene00004425	ENSG00000167526	WBGene00004425
WBGene00004426	ENSG00000188846	WBGene00004426
WBGene00004428	ENSG00000142541	WBGene00004428
WBGene00004429	ENSG00000215472	WBGene00004429
WBGene00004430	ENSG00000063177	WBGene00004430
WBGene00004431	ENSG00000108298	WBGene00004431
WBGene00004433	ENSG00000122026	WBGene00004433
WBGene00004434	ENSG00000116251	WBGene00004434
WBGene00004435	ENSG00000125691	WBGene00004435
WBGene00004436	ENSG00000114391	WBGene00004436
WBGene00004437	ENSG00000137876	WBGene00004437
WBGene00004440	ENSG00000161970	WBGene00004440
WBGene00004441	ENSG00000131469	WBGene00004441
WBGene00004444	ENSG00000156482	WBGene00004444
WBGene00004445	ENSG00000071082	WBGene00004445
WBGene00004446	ENSG00000144713	WBGene00004446
WBGene00004447	ENSG00000182899	WBGene00004447
WBGene00004449	ENSG00000136942	WBGene00004449
WBGene00004451	ENSG00000145592	WBGene00004451
WBGene00004452	ENSG00000172809	WBGene00004452
WBGene00004454	ENSG00000241343	WBGene00004454
WBGene00004456	ENSG00000197756	WBGene00004456
WBGene00004457	ENSG00000005810	WBGene00004457
WBGene00004458	ENSG00000175166	WBGene00004458
WBGene00004460	ENSG00000108344	WBGene00004460
WBGene00004461	ENSG00000197170	WBGene00004461
WBGene00004462	ENSG00000108671	WBGene00004462
WBGene00004463	ENSG00000163636	WBGene00004463
WBGene00004464	ENSG00000103035	WBGene00004464
WBGene00004465	ENSG00000185627	WBGene00004465
WBGene00004466	ENSG00000159352	WBGene00004466
WBGene00004467	ENSG00000115233	WBGene00004467
WBGene00004468	ENSG00000099341	WBGene00004468
WBGene00004469	ENSG00000168028	WBGene00004469
WBGene00004470	ENSG00000145425	WBGene00004470
WBGene00004471	ENSG00000140988	WBGene00004471
WBGene00004472	ENSG00000149273	WBGene00004472
WBGene00004473	ENSG00000198034	WBGene00004473
WBGene00004474	ENSG00000083845	WBGene00004474
WBGene00004475	ENSG00000137154	WBGene00004475
WBGene00004476	ENSG00000171863	WBGene00004476
WBGene00004477	ENSG00000142937	WBGene00004477
WBGene00004478	ENSG00000170889	WBGene00004478
WBGene00004479	ENSG00000270800	WBGene00004479
WBGene00004480	ENSG00000142534	WBGene00004480
WBGene00004481	ENSG00000112306	WBGene00004481
WBGene00004482	ENSG00000110700	WBGene00004482
WBGene00004483	ENSG00000164587	WBGene00004483
WBGene00004485	ENSG00000105193	WBGene00004485
WBGene00004486	ENSG00000182774	WBGene00004486
WBGene00004487	ENSG00000231500	WBGene00004487
WBGene00004489	ENSG00000008988	WBGene00004489
WBGene00004490	ENSG00000171858	WBGene00004490
WBGene00004491	ENSG00000134419	WBGene00004491
WBGene00004492	ENSG00000186468	WBGene00004492
WBGene00004493	ENSG00000138326	WBGene00004493
WBGene00004494	ENSG00000118181	WBGene00004494
WBGene00004495	ENSG00000197728	WBGene00004495
WBGene00004496	ENSG00000177954	WBGene00004496
WBGene00004497	ENSG00000233927	WBGene00004497
WBGene00004499	ENSG00000149806	WBGene00004499
WBGene00004501	ENSG00000161057	WBGene00004501
WBGene00004502	ENSG00000100764	WBGene00004502
WBGene00004503	ENSG00000013275	WBGene00004503
WBGene00004504	ENSG00000100519	WBGene00004504
WBGene00004505	ENSG00000165916	WBGene00004505
WBGene00004506	ENSG00000087191	WBGene00004506
WBGene00004507	ENSG00000165917	WBGene00004507
WBGene00004679	ENSG00000113643	WBGene00004679
WBGene00004700	ENSG00000136450	WBGene00004700
WBGene00004719	ENSG00000174672	WBGene00004719
WBGene00004727	ENSG00000211455	WBGene00004727
WBGene00004728	ENSG00000075539	WBGene00004728
WBGene00004729	ENSG00000169855	WBGene00004729
WBGene00004736	ENSG00000196296	WBGene00004736
WBGene00004738	ENSG00000101972	WBGene00004738
WBGene00004743	ENSG00000085365	WBGene00004743
WBGene00004744	ENSG00000114650	WBGene00004744
WBGene00004752	ENSG00000112685	WBGene00004752
WBGene00004753	ENSG00000131558	WBGene00004753
WBGene00004754	ENSG00000100934	WBGene00004754
WBGene00004755	ENSG00000176986	WBGene00004755
WBGene00004756	ENSG00000138802	WBGene00004756
WBGene00004758	ENSG00000108984	WBGene00004758
WBGene00004759	ENSG00000071537	WBGene00004759
WBGene00004760	ENSG00000172915	WBGene00004760
WBGene00004766	ENSG00000086598	WBGene00004766
WBGene00004768	ENSG00000162298	WBGene00004768
WBGene00004769	ENSG00000080815	WBGene00004769
WBGene00004774	ENSG00000177885	WBGene00004774
WBGene00004776	ENSG00000102468	WBGene00004776
WBGene00004779	ENSG00000178394	WBGene00004779
WBGene00004780	ENSG00000148680	WBGene00004780
WBGene00004781	ENSG00000183955	WBGene00004781
WBGene00004787	ENSG00000148290	WBGene00004787
WBGene00004788	ENSG00000148248	WBGene00004788
WBGene00004789	ENSG00000118515	WBGene00004789
WBGene00004790	ENSG00000170624	WBGene00004790
WBGene00004801	ENSG00000089163	WBGene00004801
WBGene00004802	ENSG00000089163	WBGene00004802
WBGene00004806	ENSG00000100603	WBGene00004806
WBGene00004807	ENSG00000113558	WBGene00004807
WBGene00004808	ENSG00000113558	WBGene00004808
WBGene00004830	ENSG00000156113	WBGene00004830
WBGene00004831	ENSG00000107147	WBGene00004831
WBGene00004854	ENSG00000145147	WBGene00004854
WBGene00004855	ENSG00000137877	WBGene00004855
WBGene00004856	ENSG00000120693	WBGene00004856
WBGene00004860	ENSG00000138696	WBGene00004860
WBGene00004873	ENSG00000108055	WBGene00004873
WBGene00004875	ENSG00000123505	WBGene00004875
WBGene00004876	ENSG00000110911	WBGene00004876
WBGene00004877	ENSG00000110911	WBGene00004877
WBGene00004878	ENSG00000110911	WBGene00004878
WBGene00004880	ENSG00000005007	WBGene00004880
WBGene00004888	ENSG00000116030	WBGene00004888
WBGene00004892	ENSG00000198964	WBGene00004892
WBGene00004895	ENSG00000122692	WBGene00004895
WBGene00004897	ENSG00000139190	WBGene00004897
WBGene00004910	ENSG00000157103	WBGene00004910
WBGene00004912	ENSG00000100321	WBGene00004912
WBGene00004913	ENSG00000185666	WBGene00004913
WBGene00004914	ENSG00000100028	WBGene00004914
WBGene00004915	ENSG00000128739	WBGene00004915
WBGene00004916	ENSG00000167088	WBGene00004916
WBGene00004917	ENSG00000125743	WBGene00004917
WBGene00004920	ENSG00000143977	WBGene00004920
WBGene00004921	ENSG00000067715	WBGene00004921
WBGene00004927	ENSG00000205302	WBGene00004927
WBGene00004929	ENSG00000108061	WBGene00004929
WBGene00004930	ENSG00000142168	WBGene00004930
WBGene00004931	ENSG00000112096	WBGene00004931
WBGene00004932	ENSG00000112096	WBGene00004932
WBGene00004947	ENSG00000115904	WBGene00004947
WBGene00004951	ENSG00000197694	WBGene00004951
WBGene00004959	ENSG00000147416	WBGene00004959
WBGene00004969	ENSG00000196586	WBGene00004969
WBGene00004978	ENSG00000141385	WBGene00004978
WBGene00004980	ENSG00000184343	WBGene00004980
WBGene00005007	ENSG00000119335	WBGene00005007
WBGene00005010	ENSG00000004487	WBGene00005010
WBGene00005014	ENSG00000213246	WBGene00005014
WBGene00005015	ENSG00000196235	WBGene00005015
WBGene00005019	ENSG00000115652	WBGene00005019
WBGene00005020	ENSG00000176022	WBGene00005020
WBGene00005021	ENSG00000027847	WBGene00005021
WBGene00005022	ENSG00000109814	WBGene00005022
WBGene00005023	ENSG00000198108	WBGene00005023
WBGene00005025	ENSG00000116704	WBGene00005025
WBGene00005026	ENSG00000149541	WBGene00005026
WBGene00005077	ENSG00000010810	WBGene00005077
WBGene00005078	ENSG00000111816	WBGene00005078
WBGene00005642	ENSG00000206073	WBGene00005642
WBGene00005643	ENSG00000206073	WBGene00005643
WBGene00005644	ENSG00000206073	WBGene00005644
WBGene00005647	ENSG00000206073	WBGene00005647
WBGene00005648	ENSG00000206073	WBGene00005648
WBGene00005649	ENSG00000206073	WBGene00005649
WBGene00005662	ENSG00000104835	WBGene00005662
WBGene00005663	ENSG00000031698	WBGene00005663
WBGene00006059	ENSG00000155304	WBGene00006059
WBGene00006061	ENSG00000165283	WBGene00006061
WBGene00006062	ENSG00000172164	WBGene00006062
WBGene00006064	ENSG00000148175	WBGene00006064
WBGene00006307	ENSG00000176102	WBGene00006307
WBGene00006308	ENSG00000137573	WBGene00006308
WBGene00006309	ENSG00000062096	WBGene00006309
WBGene00006349	ENSG00000112282	WBGene00006349
WBGene00006351	ENSG00000081760	WBGene00006351
WBGene00006352	ENSG00000175470	WBGene00006352
WBGene00006364	ENSG00000139220	WBGene00006364
WBGene00006367	ENSG00000103067	WBGene00006367
WBGene00006373	ENSG00000162236	WBGene00006373
WBGene00006382	ENSG00000147133	WBGene00006382
WBGene00006383	ENSG00000064313	WBGene00006383
WBGene00006386	ENSG00000148835	WBGene00006386
WBGene00006387	ENSG00000106290	WBGene00006387
WBGene00006397	ENSG00000197780	WBGene00006397
WBGene00006402	ENSG00000171124	WBGene00006402
WBGene00006405	ENSG00000205726	WBGene00006405
WBGene00006407	ENSG00000115641	WBGene00006407
WBGene00006410	ENSG00000071051	WBGene00006410
WBGene00006411	ENSG00000150594	WBGene00006411
WBGene00006412	ENSG00000165246	WBGene00006412
WBGene00006414	ENSG00000083750	WBGene00006414
WBGene00006415	ENSG00000133243	WBGene00006415
WBGene00006416	ENSG00000168906	WBGene00006416
WBGene00006418	ENSG00000166224	WBGene00006418
WBGene00006424	ENSG00000159692	WBGene00006424
WBGene00006432	ENSG00000088812	WBGene00006432
WBGene00006433	ENSG00000117118	WBGene00006433
WBGene00006434	ENSG00000167815	WBGene00006434
WBGene00006435	ENSG00000149084	WBGene00006435
WBGene00006437	ENSG00000143776	WBGene00006437
WBGene00006438	ENSG00000065054	WBGene00006438
WBGene00006439	ENSG00000169100	WBGene00006439
WBGene00006443	ENSG00000101349	WBGene00006443
WBGene00006446	ENSG00000066427	WBGene00006446
WBGene00006447	ENSG00000101654	WBGene00006447
WBGene00006448	ENSG00000167699	WBGene00006448
WBGene00006460	ENSG00000138032	WBGene00006460
WBGene00006461	ENSG00000156958	WBGene00006461
WBGene00006463	ENSG00000158864	WBGene00006463
WBGene00006465	ENSG00000257365	WBGene00006465
WBGene00006470	ENSG00000135472	WBGene00006470
WBGene00006472	ENSG00000125304	WBGene00006472
WBGene00006473	ENSG00000110060	WBGene00006473
WBGene00006474	ENSG00000196363	WBGene00006474
WBGene00006475	ENSG00000179546	WBGene00006475
WBGene00006477	ENSG00000149577	WBGene00006477
WBGene00006478	ENSG00000167740	WBGene00006478
WBGene00006479	ENSG00000155957	WBGene00006479
WBGene00006479	ENSG00000228144	WBGene00006479
WBGene00006481	ENSG00000171566	WBGene00006481
WBGene00006486	ENSG00000104635	WBGene00006486
WBGene00006490	ENSG00000134313	WBGene00006490
WBGene00006491	ENSG00000102125	WBGene00006491
WBGene00006493	ENSG00000116679	WBGene00006493
WBGene00006494	ENSG00000112473	WBGene00006494
WBGene00006497	ENSG00000167721	WBGene00006497
WBGene00006498	ENSG00000145934	WBGene00006498
WBGene00006503	ENSG00000147164	WBGene00006503
WBGene00006505	ENSG00000223802	WBGene00006505
WBGene00006510	ENSG00000124275	WBGene00006510
WBGene00006512	ENSG00000204574	WBGene00006512
WBGene00006515	ENSG00000115514	WBGene00006515
WBGene00006517	ENSG00000176444	WBGene00006517
WBGene00006518	ENSG00000083123	WBGene00006518
WBGene00006520	ENSG00000166471	WBGene00006520
WBGene00006525	ENSG00000070729	WBGene00006525
WBGene00006526	ENSG00000144191	WBGene00006526
WBGene00006527	ENSG00000138814	WBGene00006527
WBGene00006528	ENSG00000167553	WBGene00006528
WBGene00006529	ENSG00000167553	WBGene00006529
WBGene00006530	ENSG00000167553	WBGene00006530
WBGene00006531	ENSG00000167552	WBGene00006531
WBGene00006535	ENSG00000123416	WBGene00006535
WBGene00006536	ENSG00000196230	WBGene00006536
WBGene00006537	ENSG00000196230	WBGene00006537
WBGene00006538	ENSG00000188229	WBGene00006538
WBGene00006541	ENSG00000123454	WBGene00006541
WBGene00006563	ENSG00000169217	WBGene00006563
WBGene00006566	ENSG00000213339	WBGene00006566
WBGene00006567	ENSG00000151576	WBGene00006567
WBGene00006568	ENSG00000167900	WBGene00006568
WBGene00006573	ENSG00000134809	WBGene00006573
WBGene00006575	ENSG00000004139	WBGene00006575
WBGene00006577	ENSG00000028839	WBGene00006577
WBGene00006578	ENSG00000078902	WBGene00006578
WBGene00006579	ENSG00000146872	WBGene00006579
WBGene00006594	ENSG00000145087	WBGene00006594
WBGene00006595	ENSG00000198900	WBGene00006595
WBGene00006596	ENSG00000177302	WBGene00006596
WBGene00006597	ENSG00000136816	WBGene00006597
WBGene00006598	ENSG00000136816	WBGene00006598
WBGene00006599	ENSG00000163932	WBGene00006599
WBGene00006600	ENSG00000139287	WBGene00006600
WBGene00006601	ENSG00000111669	WBGene00006601
WBGene00006606	ENSG00000149260	WBGene00006606
WBGene00006607	ENSG00000118094	WBGene00006607
WBGene00006609	ENSG00000118094	WBGene00006609
WBGene00006611	ENSG00000118094	WBGene00006611
WBGene00006612	ENSG00000082512	WBGene00006612
WBGene00006613	ENSG00000104907	WBGene00006613
WBGene00006614	ENSG00000137672	WBGene00006614
WBGene00006615	ENSG00000133107	WBGene00006615
WBGene00006617	ENSG00000113407	WBGene00006617
WBGene00006619	ENSG00000122194	WBGene00006619
WBGene00006620	ENSG00000184012	WBGene00006620
WBGene00006626	ENSG00000197157	WBGene00006626
WBGene00006633	ENSG00000135404	WBGene00006633
WBGene00006634	ENSG00000085117	WBGene00006634
WBGene00006638	ENSG00000168785	WBGene00006638
WBGene00006647	ENSG00000064419	WBGene00006647
WBGene00006648	ENSG00000137947	WBGene00006648
WBGene00006655	ENSG00000166402	WBGene00006655
WBGene00006669	ENSG00000184261	WBGene00006669
WBGene00006696	ENSG00000135750	WBGene00006696
WBGene00006697	ENSG00000063244	WBGene00006697
WBGene00006699	ENSG00000130985	WBGene00006699
WBGene00006701	ENSG00000077721	WBGene00006701
WBGene00006702	ENSG00000107341	WBGene00006702
WBGene00006703	ENSG00000198833	WBGene00006703
WBGene00006705	ENSG00000186591	WBGene00006705
WBGene00006707	ENSG00000184182	WBGene00006707
WBGene00006708	ENSG00000177889	WBGene00006708
WBGene00006709	ENSG00000184787	WBGene00006709
WBGene00006711	ENSG00000104343	WBGene00006711
WBGene00006715	ENSG00000078140	WBGene00006715
WBGene00006716	ENSG00000078140	WBGene00006716
WBGene00006720	ENSG00000140367	WBGene00006720
WBGene00006724	ENSG00000116750	WBGene00006724
WBGene00006726	ENSG00000198258	WBGene00006726
WBGene00006728	ENSG00000221983	WBGene00006728
WBGene00006729	ENSG00000153291	WBGene00006729
WBGene00006730	ENSG00000244687	WBGene00006730
WBGene00006733	ENSG00000070010	WBGene00006733
WBGene00006734	ENSG00000130939	WBGene00006734
WBGene00006742	ENSG00000148408	WBGene00006742
WBGene00006743	ENSG00000164330	WBGene00006743
WBGene00006745	ENSG00000107731	WBGene00006745
WBGene00006746	ENSG00000065320	WBGene00006746
WBGene00006748	ENSG00000166828	WBGene00006748
WBGene00006752	ENSG00000130477	WBGene00006752
WBGene00006755	ENSG00000008294	WBGene00006755
WBGene00006756	ENSG00000187714	WBGene00006756
WBGene00006757	ENSG00000136854	WBGene00006757
WBGene00006760	ENSG00000112208	WBGene00006760
WBGene00006761	ENSG00000067221	WBGene00006761
WBGene00006762	ENSG00000128683	WBGene00006762
WBGene00006763	ENSG00000159082	WBGene00006763
WBGene00006767	ENSG00000163618	WBGene00006767
WBGene00006768	ENSG00000033627	WBGene00006768
WBGene00006771	ENSG00000171914	WBGene00006771
WBGene00006774	ENSG00000147434	WBGene00006774
WBGene00006776	ENSG00000187323	WBGene00006776
WBGene00006779	ENSG00000145349	WBGene00006779
WBGene00006781	ENSG00000141161	WBGene00006781
WBGene00006783	ENSG00000101438	WBGene00006783
WBGene00006785	ENSG00000115446	WBGene00006785
WBGene00006787	ENSG00000142798	WBGene00006787
WBGene00006789	ENSG00000078814	WBGene00006789
WBGene00006790	ENSG00000175745	WBGene00006790
WBGene00006791	ENSG00000140600	WBGene00006791
WBGene00006793	ENSG00000122545	WBGene00006793
WBGene00006795	ENSG00000125354	WBGene00006795
WBGene00006798	ENSG00000106089	WBGene00006798
WBGene00006801	ENSG00000198626	WBGene00006801
WBGene00006803	ENSG00000115306	WBGene00006803
WBGene00006805	ENSG00000038382	WBGene00006805
WBGene00006807	ENSG00000161082	WBGene00006807
WBGene00006808	ENSG00000171055	WBGene00006808
WBGene00006809	ENSG00000102452	WBGene00006809
WBGene00006810	ENSG00000071127	WBGene00006810
WBGene00006811	ENSG00000133958	WBGene00006811
WBGene00006817	ENSG00000111875	WBGene00006817
WBGene00006822	ENSG00000112494	WBGene00006822
WBGene00006823	ENSG00000136842	WBGene00006823
WBGene00006826	ENSG00000169756	WBGene00006826
WBGene00006829	ENSG00000072958	WBGene00006829
WBGene00006830	ENSG00000184611	WBGene00006830
WBGene00006831	ENSG00000130294	WBGene00006831
WBGene00006832	ENSG00000166828	WBGene00006832
WBGene00006833	ENSG00000104388	WBGene00006833
WBGene00006836	ENSG00000073712	WBGene00006836
WBGene00006840	ENSG00000170759	WBGene00006840
WBGene00006843	ENSG00000175970	WBGene00006843
WBGene00006856	ENSG00000101557	WBGene00006856
WBGene00006862	ENSG00000157881	WBGene00006862
WBGene00006863	ENSG00000056998	WBGene00006863
WBGene00006868	ENSG00000116106	WBGene00006868
WBGene00006870	ENSG00000007372	WBGene00006870
WBGene00006876	ENSG00000151914	WBGene00006876
WBGene00006887	ENSG00000134215	WBGene00006887
WBGene00006888	ENSG00000067048	WBGene00006888
WBGene00006889	ENSG00000155959	WBGene00006889
WBGene00006890	ENSG00000101856	WBGene00006890
WBGene00006910	ENSG00000185883	WBGene00006910
WBGene00006911	ENSG00000185883	WBGene00006911
WBGene00006912	ENSG00000185883	WBGene00006912
WBGene00006913	ENSG00000117410	WBGene00006913
WBGene00006917	ENSG00000131100	WBGene00006917
WBGene00006918	ENSG00000128524	WBGene00006918
WBGene00006919	ENSG00000136888	WBGene00006919
WBGene00006921	ENSG00000116039	WBGene00006921
WBGene00006932	ENSG00000078142	WBGene00006932
WBGene00006933	ENSG00000069329	WBGene00006933
WBGene00006934	ENSG00000143952	WBGene00006934
WBGene00006936	ENSG00000204394	WBGene00006936
WBGene00006937	ENSG00000156709	WBGene00006937
WBGene00006944	ENSG00000165392	WBGene00006944
WBGene00006945	ENSG00000140105	WBGene00006945
WBGene00006946	ENSG00000116874	WBGene00006946
WBGene00006960	ENSG00000138036	WBGene00006960
WBGene00006963	ENSG00000136936	WBGene00006963
WBGene00006964	ENSG00000088930	WBGene00006964
WBGene00006968	ENSG00000139131	WBGene00006968
WBGene00006974	ENSG00000137807	WBGene00006974
WBGene00006987	ENSG00000198598	WBGene00006987
WBGene00006993	ENSG00000133083	WBGene00006993
WBGene00006996	ENSG00000162378	WBGene00006996
WBGene00007000	ENSG00000178952	WBGene00007000
WBGene00007007	ENSG00000114738	WBGene00007007
WBGene00007008	ENSG00000103549	WBGene00007008
WBGene00007009	ENSG00000123124	WBGene00007009
WBGene00007010	ENSG00000170248	WBGene00007010
WBGene00007014	ENSG00000133398	WBGene00007014
WBGene00007017	ENSG00000042429	WBGene00007017
WBGene00007018	ENSG00000130772	WBGene00007018
WBGene00007020	ENSG00000124641	WBGene00007020
WBGene00007021	ENSG00000148950	WBGene00007021
WBGene00007026	ENSG00000108590	WBGene00007026
WBGene00007028	ENSG00000196367	WBGene00007028
WBGene00007029	ENSG00000172977	WBGene00007029
WBGene00007036	ENSG00000142168	WBGene00007036
WBGene00007042	ENSG00000163939	WBGene00007042
WBGene00007043	ENSG00000175548	WBGene00007043
WBGene00007045	ENSG00000148985	WBGene00007045
WBGene00007048	ENSG00000086102	WBGene00007048
WBGene00007050	ENSG00000120800	WBGene00007050
WBGene00007054	ENSG00000144579	WBGene00007054
WBGene00007055	ENSG00000174080	WBGene00007055
WBGene00007056	ENSG00000105612	WBGene00007056
WBGene00007057	ENSG00000169100	WBGene00007057
WBGene00007059	ENSG00000223501	WBGene00007059
WBGene00007067	ENSG00000130038	WBGene00007067
WBGene00007080	ENSG00000107819	WBGene00007080
WBGene00007099	ENSG00000100348	WBGene00007099
WBGene00007102	ENSG00000128039	WBGene00007102
WBGene00007103	ENSG00000150938	WBGene00007103
WBGene00007106	ENSG00000172264	WBGene00007106
WBGene00007108	ENSG00000160211	WBGene00007108
WBGene00007111	ENSG00000075856	WBGene00007111
WBGene00007114	ENSG00000100416	WBGene00007114
WBGene00007117	ENSG00000163354	WBGene00007117
WBGene00007122	ENSG00000106049	WBGene00007122
WBGene00007128	ENSG00000108433	WBGene00007128
WBGene00007128	ENSG00000262633	WBGene00007128
WBGene00007129	ENSG00000138796	WBGene00007129
WBGene00007137	ENSG00000205629	WBGene00007137
WBGene00007138	ENSG00000158296	WBGene00007138
WBGene00007143	ENSG00000131373	WBGene00007143
WBGene00007144	ENSG00000169230	WBGene00007144
WBGene00007145	ENSG00000156170	WBGene00007145
WBGene00007150	ENSG00000131473	WBGene00007150
WBGene00007174	ENSG00000057252	WBGene00007174
WBGene00007175	ENSG00000095321	WBGene00007175
WBGene00007184	ENSG00000198730	WBGene00007184
WBGene00007188	ENSG00000214517	WBGene00007188
WBGene00007189	ENSG00000143315	WBGene00007189
WBGene00007194	ENSG00000117543	WBGene00007194
WBGene00007197	ENSG00000100033	WBGene00007197
WBGene00007197	ENSG00000277196	WBGene00007197
WBGene00007201	ENSG00000178896	WBGene00007201
WBGene00007202	ENSG00000239382	WBGene00007202
WBGene00007210	ENSG00000187546	WBGene00007210
WBGene00007215	ENSG00000155463	WBGene00007215
WBGene00007216	ENSG00000083937	WBGene00007216
WBGene00007217	ENSG00000022277	WBGene00007217
WBGene00007226	ENSG00000123091	WBGene00007226
WBGene00007234	ENSG00000125246	WBGene00007234
WBGene00007235	ENSG00000100591	WBGene00007235
WBGene00007236	ENSG00000037757	WBGene00007236
WBGene00007256	ENSG00000166164	WBGene00007256
WBGene00007267	ENSG00000109066	WBGene00007267
WBGene00007277	ENSG00000111875	WBGene00007277
WBGene00007287	ENSG00000072786	WBGene00007287
WBGene00007302	ENSG00000276023	WBGene00007302
WBGene00007330	ENSG00000083720	WBGene00007330
WBGene00007339	ENSG00000156869	WBGene00007339
WBGene00007347	ENSG00000169026	WBGene00007347
WBGene00007350	ENSG00000163541	WBGene00007350
WBGene00007351	ENSG00000269113	WBGene00007351
WBGene00007352	ENSG00000165280	WBGene00007352
WBGene00007355	ENSG00000100142	WBGene00007355
WBGene00007363	ENSG00000149084	WBGene00007363
WBGene00007364	ENSG00000149084	WBGene00007364
WBGene00007384	ENSG00000169241	WBGene00007384
WBGene00007387	ENSG00000155666	WBGene00007387
WBGene00007388	ENSG00000117479	WBGene00007388
WBGene00007400	ENSG00000106245	WBGene00007400
WBGene00007412	ENSG00000100109	WBGene00007412
WBGene00007413	ENSG00000188976	WBGene00007413
WBGene00007428	ENSG00000140153	WBGene00007428
WBGene00007429	ENSG00000076043	WBGene00007429
WBGene00007434	ENSG00000075089	WBGene00007434
WBGene00007435	ENSG00000088035	WBGene00007435
WBGene00007436	ENSG00000164008	WBGene00007436
WBGene00007438	ENSG00000101474	WBGene00007438
WBGene00007444	ENSG00000156502	WBGene00007444
WBGene00007446	ENSG00000143797	WBGene00007446
WBGene00007463	ENSG00000115677	WBGene00007463
WBGene00007480	ENSG00000115419	WBGene00007480
WBGene00007505	ENSG00000154864	WBGene00011862	Merged to WBGene00007505
WBGene00007507	ENSG00000243989	WBGene00007507
WBGene00007508	ENSG00000243989	WBGene00007508
WBGene00007509	ENSG00000243989	WBGene00007509
WBGene00007514	ENSG00000105726	WBGene00007514
WBGene00007516	ENSG00000224586	WBGene00007516
WBGene00007517	ENSG00000224586	WBGene00007517
WBGene00007528	ENSG00000117262	WBGene00007528
WBGene00007528	ENSG00000188092	WBGene00007528
WBGene00007531	ENSG00000137161	WBGene00007531
WBGene00007534	ENSG00000107164	WBGene00007534
WBGene00007548	ENSG00000107902	WBGene00007548
WBGene00007549	ENSG00000169682	WBGene00007549
WBGene00007554	ENSG00000112640	WBGene00007554
WBGene00007555	ENSG00000129932	WBGene00007555
WBGene00007556	ENSG00000086848	WBGene00007556
WBGene00007561	ENSG00000114209	WBGene00007561
WBGene00007564	ENSG00000175110	WBGene00007564
WBGene00007576	ENSG00000108963	WBGene00007576
WBGene00007581	ENSG00000137760	WBGene00007581
WBGene00007584	ENSG00000075415	WBGene00007584
WBGene00007588	ENSG00000068878	WBGene00007588
WBGene00007591	ENSG00000165915	WBGene00007591
WBGene00007593	ENSG00000179889	WBGene00007593
WBGene00007595	ENSG00000167619	WBGene00007595
WBGene00007617	ENSG00000179041	WBGene00007617
WBGene00007620	ENSG00000204084	WBGene00007620
WBGene00007622	ENSG00000075303	WBGene00007622
WBGene00007623	ENSG00000183520	WBGene00007623
WBGene00007625	ENSG00000150459	WBGene00007625
WBGene00007626	ENSG00000137522	WBGene00007626
WBGene00007664	ENSG00000120088	WBGene00007664
WBGene00007666	ENSG00000108523	WBGene00007666
WBGene00007686	ENSG00000130204	WBGene00007686
WBGene00007690	ENSG00000173349	WBGene00007690
WBGene00007696	ENSG00000067167	WBGene00007696
WBGene00007703	ENSG00000107862	WBGene00007703
WBGene00007707	ENSG00000103089	WBGene00007707
WBGene00007711	ENSG00000011198	WBGene00007711
WBGene00007712	ENSG00000055950	WBGene00007712
WBGene00007730	ENSG00000262664	WBGene00007730
WBGene00007744	ENSG00000121350	WBGene00007744
WBGene00007745	ENSG00000157353	WBGene00007745
WBGene00007752	ENSG00000163625	WBGene00007752
WBGene00007753	ENSG00000197594	WBGene00007753
WBGene00007755	ENSG00000197594	WBGene00007755
WBGene00007774	ENSG00000092931	WBGene00007774
WBGene00007784	ENSG00000175792	WBGene00007784
WBGene00007787	ENSG00000139637	WBGene00007787
WBGene00007799	ENSG00000179915	WBGene00007799
WBGene00007801	ENSG00000104321	WBGene00007801
WBGene00007812	ENSG00000162368	WBGene00007812
WBGene00007825	ENSG00000130045	WBGene00007825
WBGene00007836	ENSG00000092621	WBGene00007836
WBGene00007848	ENSG00000166347	WBGene00007848
WBGene00007860	ENSG00000188026	WBGene00007860
WBGene00007878	ENSG00000156171	WBGene00007878
WBGene00007880	ENSG00000128609	WBGene00007880
WBGene00007882	ENSG00000151470	WBGene00007882
WBGene00007886	ENSG00000105755	WBGene00007886
WBGene00007904	ENSG00000109323	WBGene00007904
WBGene00007913	ENSG00000197838	WBGene00007913
WBGene00007913	ENSG00000198077	WBGene00007913
WBGene00007913	ENSG00000255974	WBGene00007913
WBGene00007917	ENSG00000016391	WBGene00007917
WBGene00007918	ENSG00000063176	WBGene00007918
WBGene00007922	ENSG00000119414	WBGene00007922
WBGene00007924	ENSG00000148484	WBGene00007924
WBGene00007927	ENSG00000109519	WBGene00007927
WBGene00007941	ENSG00000168936	WBGene00007941
WBGene00007942	ENSG00000182054	WBGene00007942
WBGene00007952	ENSG00000130227	WBGene00007952
WBGene00007953	ENSG00000163517	WBGene00007953
WBGene00007954	ENSG00000077616	WBGene00007954
WBGene00007956	ENSG00000167632	WBGene00007956
WBGene00007959	ENSG00000157600	WBGene00007959
WBGene00007963	ENSG00000160868	WBGene00007963
WBGene00007964	ENSG00000160868	WBGene00007964
WBGene00007967	ENSG00000160868	WBGene00007967
WBGene00007969	ENSG00000131069	WBGene00007969
WBGene00007971	ENSG00000102978	WBGene00007971
WBGene00007972	ENSG00000136875	WBGene00007972
WBGene00007974	ENSG00000228716	WBGene00007974
WBGene00007979	ENSG00000138600	WBGene00007979
WBGene00007980	ENSG00000085721	WBGene00007980
WBGene00007982	ENSG00000120594	WBGene00007982
WBGene00007993	ENSG00000101365	WBGene00007993
WBGene00008000	ENSG00000119899	WBGene00008000
WBGene00008006	ENSG00000075884	WBGene00008006
WBGene00008008	ENSG00000138382	WBGene00008008
WBGene00008018	ENSG00000167037	WBGene00008018
WBGene00008019	ENSG00000106392	WBGene00008019
WBGene00008033	ENSG00000169682	WBGene00008033
WBGene00008041	ENSG00000143222	WBGene00008041
WBGene00008052	ENSG00000040531	WBGene00008052
WBGene00008053	ENSG00000165280	WBGene00008053
WBGene00008078	ENSG00000004766	WBGene00008078
WBGene00008093	ENSG00000172061	WBGene00008093
WBGene00008117	ENSG00000104687	WBGene00008117
WBGene00008119	ENSG00000198231	WBGene00008119
WBGene00008121	ENSG00000122042	WBGene00008121
WBGene00008122	ENSG00000059769	WBGene00008122
WBGene00008131	ENSG00000094841	WBGene00008131
WBGene00008132	ENSG00000117308	WBGene00008132
WBGene00008133	ENSG00000132394	WBGene00008133
WBGene00008136	ENSG00000141627	WBGene00008136
WBGene00008137	ENSG00000107819	WBGene00008137
WBGene00008148	ENSG00000134109	WBGene00008148
WBGene00008149	ENSG00000180817	WBGene00008149
WBGene00008151	ENSG00000160214	WBGene00008151
WBGene00008164	ENSG00000177370	WBGene00008164
WBGene00008165	ENSG00000164187	WBGene00008165
WBGene00008167	ENSG00000161533	WBGene00008167
WBGene00008205	ENSG00000168906	WBGene00008205
WBGene00008220	ENSG00000240038	WBGene00008220
WBGene00008225	ENSG00000137806	WBGene00008225
WBGene00008237	ENSG00000181830	WBGene00008237
WBGene00008238	ENSG00000183828	WBGene00008238
WBGene00008239	ENSG00000138039	WBGene00008239
WBGene00008258	ENSG00000198162	WBGene00008258
WBGene00008273	ENSG00000110628	WBGene00008273
WBGene00008288	ENSG00000070761	WBGene00008288
WBGene00008311	ENSG00000100784	WBGene00008311
WBGene00008316	ENSG00000169093	WBGene00008316
WBGene00008317	ENSG00000164074	WBGene00008317
WBGene00008320	ENSG00000197119	WBGene00008320
WBGene00008338	ENSG00000006712	WBGene00008338
WBGene00008339	ENSG00000047621	WBGene00008339
WBGene00008345	ENSG00000155970	WBGene00008345
WBGene00008354	ENSG00000140905	WBGene00008354
WBGene00008364	ENSG00000144741	WBGene00008364
WBGene00008366	ENSG00000163870	WBGene00008366
WBGene00008370	ENSG00000006757	WBGene00008370
WBGene00008371	ENSG00000165416	WBGene00008371
WBGene00008379	ENSG00000109618	WBGene00008379
WBGene00008386	ENSG00000096401	WBGene00008386
WBGene00008398	ENSG00000105185	WBGene00008398
WBGene00008402	ENSG00000139668	WBGene00008402
WBGene00008405	ENSG00000100304	WBGene00008405
WBGene00008408	ENSG00000141504	WBGene00008408
WBGene00008410	ENSG00000063761	WBGene00008410
WBGene00008411	ENSG00000111885	WBGene00008411
WBGene00008412	ENSG00000166855	WBGene00008412
WBGene00008415	ENSG00000124370	WBGene00008415
WBGene00008419	ENSG00000100897	WBGene00008419
WBGene00008425	ENSG00000110906	WBGene00008425
WBGene00008430	ENSG00000170471	WBGene00008430
WBGene00008431	ENSG00000165195	WBGene00008431
WBGene00008435	ENSG00000115419	WBGene00008435
WBGene00008439	ENSG00000147364	WBGene00008439
WBGene00008441	ENSG00000138592	WBGene00008441
WBGene00008452	ENSG00000144029	WBGene00008452
WBGene00008455	ENSG00000086189	WBGene00008455
WBGene00008456	ENSG00000132591	WBGene00008456
WBGene00008458	ENSG00000085231	WBGene00008458
WBGene00008480	ENSG00000144895	WBGene00008480
WBGene00008499	ENSG00000145476	WBGene00008499
WBGene00008502	ENSG00000204351	WBGene00008502
WBGene00008504	ENSG00000007541	WBGene00008504
WBGene00008505	ENSG00000075415	WBGene00008505
WBGene00008506	ENSG00000151005	WBGene00008506
WBGene00008510	ENSG00000107798	WBGene00008510
WBGene00008514	ENSG00000131844	WBGene00008514
WBGene00008519	ENSG00000282301	WBGene00008519
WBGene00008521	ENSG00000080618	WBGene00008521
WBGene00008531	ENSG00000102575	WBGene00008531
WBGene00008532	ENSG00000254986	WBGene00008532
WBGene00008538	ENSG00000137767	WBGene00008538
WBGene00008546	ENSG00000131459	WBGene00008546
WBGene00008547	ENSG00000172046	WBGene00008547
WBGene00008548	ENSG00000171174	WBGene00008548
WBGene00008564	ENSG00000161533	WBGene00008564
WBGene00008565	ENSG00000161533	WBGene00008565
WBGene00008566	ENSG00000161533	WBGene00008566
WBGene00008567	ENSG00000161533	WBGene00008567
WBGene00008571	ENSG00000007062	WBGene00008571
WBGene00008586	ENSG00000060688	WBGene00008586
WBGene00008598	ENSG00000169682	WBGene00008598
WBGene00008599	ENSG00000134853	WBGene00008599
WBGene00008606	ENSG00000174165	WBGene00008606
WBGene00008624	ENSG00000184164	WBGene00008624
WBGene00008639	ENSG00000131043	WBGene00008639
WBGene00008642	ENSG00000127054	WBGene00008642
WBGene00008645	ENSG00000062822	WBGene00008645
WBGene00008646	ENSG00000088298	WBGene00008646
WBGene00008654	ENSG00000178921	WBGene00008654
WBGene00008664	ENSG00000103274	WBGene00008664
WBGene00008678	ENSG00000149084	WBGene00008678
WBGene00008684	ENSG00000185619	WBGene00008684
WBGene00008685	ENSG00000061987	WBGene00008685
WBGene00008686	ENSG00000004866	WBGene00008686
WBGene00008693	ENSG00000118961	WBGene00008693
WBGene00008694	ENSG00000102763	WBGene00008694
WBGene00008706	ENSG00000177628	WBGene00008706
WBGene00008729	ENSG00000163166	WBGene00008729
WBGene00008733	ENSG00000104611	WBGene00008733
WBGene00008741	ENSG00000064601	WBGene00008741
WBGene00008746	ENSG00000154027	WBGene00008746
WBGene00008765	ENSG00000133731	WBGene00008765
WBGene00008766	ENSG00000175711	WBGene00008766
WBGene00008767	ENSG00000160785	WBGene00008767
WBGene00008769	ENSG00000172172	WBGene00008769
WBGene00008774	ENSG00000177058	WBGene00008774
WBGene00008775	ENSG00000115275	WBGene00008775
WBGene00008780	ENSG00000159399	WBGene00008780
WBGene00008781	ENSG00000125630	WBGene00008781
WBGene00008793	ENSG00000164073	WBGene00008793
WBGene00008800	ENSG00000090863	WBGene00008800
WBGene00008806	ENSG00000125505	WBGene00008806
WBGene00008808	ENSG00000166148	WBGene00008808
WBGene00008809	ENSG00000282301	WBGene00008809
WBGene00008810	ENSG00000282301	WBGene00008810
WBGene00008819	ENSG00000166006	WBGene00008819
WBGene00008832	ENSG00000130703	WBGene00008832
WBGene00008852	ENSG00000188021	WBGene00008852
WBGene00008856	ENSG00000101166	WBGene00008856
WBGene00008876	ENSG00000159579	WBGene00008876
WBGene00008877	ENSG00000100220	WBGene00008877
WBGene00008897	ENSG00000130517	WBGene00008897
WBGene00008905	ENSG00000130045	WBGene00008905
WBGene00008919	ENSG00000136100	WBGene00008919
WBGene00008920	ENSG00000254772	WBGene00008920
WBGene00008924	ENSG00000148339	WBGene00008924
WBGene00008927	ENSG00000115234	WBGene00008927
WBGene00008939	ENSG00000123178	WBGene00008939
WBGene00008950	ENSG00000160179	WBGene00008950
WBGene00008956	ENSG00000151414	WBGene00008956
WBGene00008959	ENSG00000277893	WBGene00008959
WBGene00008974	ENSG00000036054	WBGene00008974
WBGene00008979	ENSG00000177542	WBGene00008979
WBGene00008999	ENSG00000166268	WBGene00008999
WBGene00009002	ENSG00000169567	WBGene00009002
WBGene00009006	ENSG00000013375	WBGene00009006
WBGene00009007	ENSG00000155100	WBGene00009007
WBGene00009010	ENSG00000039650	WBGene00009010
WBGene00009012	ENSG00000100883	WBGene00009012
WBGene00009023	ENSG00000137491	WBGene00009023
WBGene00009035	ENSG00000131459	WBGene00009035
WBGene00009045	ENSG00000143183	WBGene00009045
WBGene00009048	ENSG00000116761	WBGene00009048
WBGene00009049	ENSG00000186205	WBGene00009049
WBGene00009050	ENSG00000107372	WBGene00009050
WBGene00009051	ENSG00000145494	WBGene00009051
WBGene00009057	ENSG00000134255	WBGene00009057
WBGene00009064	ENSG00000185722	WBGene00009064
WBGene00009065	ENSG00000088387	WBGene00009065
WBGene00009082	ENSG00000150768	WBGene00009082
WBGene00009084	ENSG00000115816	WBGene00009084
WBGene00009092	ENSG00000173726	WBGene00009092
WBGene00009100	ENSG00000152689	WBGene00009100
WBGene00009116	ENSG00000143376	WBGene00009116
WBGene00009119	ENSG00000011052	WBGene00009119
WBGene00009120	ENSG00000113163	WBGene00009120
WBGene00009122	ENSG00000133112	WBGene00009122
WBGene00009123	ENSG00000143303	WBGene00009123
WBGene00009124	ENSG00000026036	WBGene00009124
WBGene00009124	ENSG00000258366	WBGene00009124
WBGene00009126	ENSG00000067225	WBGene00009126
WBGene00009131	ENSG00000145331	WBGene00009131
WBGene00009138	ENSG00000138621	WBGene00009138
WBGene00009140	ENSG00000118961	WBGene00009140
WBGene00009145	ENSG00000133114	WBGene00009145
WBGene00009155	ENSG00000197753	WBGene00009155
WBGene00009158	ENSG00000142910	WBGene00009158
WBGene00009163	ENSG00000113360	WBGene00009163
WBGene00009164	ENSG00000159461	WBGene00009164
WBGene00009172	ENSG00000169762	WBGene00009172
WBGene00009177	ENSG00000135069	WBGene00009177
WBGene00009186	ENSG00000144959	WBGene00009186
WBGene00009187	ENSG00000140374	WBGene00009187
WBGene00009207	ENSG00000110536	WBGene00009207
WBGene00009211	ENSG00000227057	WBGene00009211
WBGene00009218	ENSG00000167114	WBGene00009218
WBGene00009221	ENSG00000167107	WBGene00009221
WBGene00009226	ENSG00000145476	WBGene00009226
WBGene00009232	ENSG00000137944	WBGene00009232
WBGene00009246	ENSG00000168827	WBGene00009246
WBGene00009260	ENSG00000136425	WBGene00009260
WBGene00009262	ENSG00000176095	WBGene00009262
WBGene00009264	ENSG00000211456	WBGene00009264
WBGene00009266	ENSG00000119616	WBGene00009266
WBGene00009271	ENSG00000115419	WBGene00009271
WBGene00009277	ENSG00000122390	WBGene00009277
WBGene00009285	ENSG00000007202	WBGene00009285
WBGene00009287	ENSG00000131153	WBGene00009287
WBGene00009290	ENSG00000146476	WBGene00009290
WBGene00009292	ENSG00000175985	WBGene00009292
WBGene00009305	ENSG00000165792	WBGene00009305
WBGene00009316	ENSG00000106077	WBGene00009316
WBGene00009319	ENSG00000078070	WBGene00009319
WBGene00009320	ENSG00000165630	WBGene00009320
WBGene00009322	ENSG00000065491	WBGene00009322
WBGene00009326	ENSG00000163673	WBGene00009326
WBGene00009334	ENSG00000166816	WBGene00009334
WBGene00009335	ENSG00000163344	WBGene00009335
WBGene00009336	ENSG00000145817	WBGene00009336
WBGene00009342	ENSG00000169710	WBGene00009342
WBGene00009352	ENSG00000168228	WBGene00009352
WBGene00009354	ENSG00000132323	WBGene00009354
WBGene00009366	ENSG00000176853	WBGene00009366
WBGene00009368	ENSG00000177084	WBGene00009368
WBGene00009369	ENSG00000176623	WBGene00009369
WBGene00009372	ENSG00000093009	WBGene00009372
WBGene00009435	ENSG00000116260	WBGene00009435
WBGene00009436	ENSG00000063241	WBGene00009436
WBGene00009439	ENSG00000103150	WBGene00009439
WBGene00009440	ENSG00000067829	WBGene00009440
WBGene00009441	ENSG00000114742	WBGene00009441
WBGene00009450	ENSG00000174607	WBGene00009450
WBGene00009452	ENSG00000169718	WBGene00009452
WBGene00009455	ENSG00000054148	WBGene00009455
WBGene00009475	ENSG00000174429	WBGene00009475
WBGene00009478	ENSG00000117758	WBGene00009478
WBGene00009498	ENSG00000166377	WBGene00009498
WBGene00009500	ENSG00000000971	WBGene00009500
WBGene00009503	ENSG00000090238	WBGene00009503
WBGene00009513	ENSG00000107819	WBGene00009513
WBGene00009521	ENSG00000182934	WBGene00009521
WBGene00009531	ENSG00000106992	WBGene00009531
WBGene00009542	ENSG00000184432	WBGene00009542
WBGene00009552	ENSG00000011405	WBGene00009552
WBGene00009554	ENSG00000116791	WBGene00009554
WBGene00009557	ENSG00000130299	WBGene00009557
WBGene00009559	ENSG00000173171	WBGene00009559
WBGene00009563	ENSG00000181873	WBGene00009563
WBGene00009574	ENSG00000198792	WBGene00009574
WBGene00009575	ENSG00000162368	WBGene00009575
WBGene00009580	ENSG00000135472	WBGene00009580
WBGene00009583	ENSG00000089597	WBGene00009583
WBGene00009617	ENSG00000164037	WBGene00009617
WBGene00009618	ENSG00000164037	WBGene00009618
WBGene00009619	ENSG00000185149	WBGene00009619
WBGene00009622	ENSG00000005469	WBGene00009622
WBGene00009628	ENSG00000198650	WBGene00009628
WBGene00009635	ENSG00000277893	WBGene00009635
WBGene00009647	ENSG00000040199	WBGene00009647
WBGene00009654	ENSG00000092108	WBGene00009654
WBGene00009658	ENSG00000090060	WBGene00009658
WBGene00009664	ENSG00000166411	WBGene00009664
WBGene00009666	ENSG00000181035	WBGene00009666
WBGene00009668	ENSG00000167005	WBGene00009668
WBGene00009671	ENSG00000140259	WBGene00009671
WBGene00009672	ENSG00000159086	WBGene00009672
WBGene00009674	ENSG00000070081	WBGene00009674
WBGene00009681	ENSG00000123159	WBGene00009681
WBGene00009711	ENSG00000117133	WBGene00009711
WBGene00009726	ENSG00000107021	WBGene00009726
WBGene00009732	ENSG00000105669	WBGene00009732
WBGene00009734	ENSG00000217930	WBGene00009734
WBGene00009735	ENSG00000122687	WBGene00009735
WBGene00009736	ENSG00000166595	WBGene00009736
WBGene00009769	ENSG00000178605	WBGene00009769
WBGene00009771	ENSG00000085760	WBGene00009771
WBGene00009772	ENSG00000198839	WBGene00009772
WBGene00009773	ENSG00000107798	WBGene00009773
WBGene00009776	ENSG00000162384	WBGene00009776
WBGene00009781	ENSG00000119698	WBGene00009781
WBGene00009783	ENSG00000157916	WBGene00009783
WBGene00009784	ENSG00000106638	WBGene00009784
WBGene00009793	ENSG00000065243	WBGene00009793
WBGene00009801	ENSG00000184381	WBGene00009801
WBGene00009812	ENSG00000136143	WBGene00009812
WBGene00009813	ENSG00000084110	WBGene00009813
WBGene00009829	ENSG00000170348	WBGene00009829
WBGene00009831	ENSG00000158286	WBGene00009831
WBGene00009865	ENSG00000164308	WBGene00009865
WBGene00009867	ENSG00000177453	WBGene00009867
WBGene00009876	ENSG00000164124	WBGene00009876
WBGene00009902	ENSG00000170271	WBGene00009902
WBGene00009903	ENSG00000170271	WBGene00009903
WBGene00009918	ENSG00000140905	WBGene00009918
WBGene00009919	ENSG00000197885	WBGene00009919
WBGene00009920	ENSG00000033867	WBGene00009920
WBGene00009925	ENSG00000140650	WBGene00009925
WBGene00009944	ENSG00000135297	WBGene00009944
WBGene00009947	ENSG00000172425	WBGene00009947
WBGene00009952	ENSG00000167315	WBGene00009952
WBGene00009966	ENSG00000261796	WBGene00009966
WBGene00009976	ENSG00000136485	WBGene00009976
WBGene00009978	ENSG00000124702	WBGene00009978
WBGene00009987	ENSG00000105254	WBGene00009987
WBGene00009992	ENSG00000178127	WBGene00009992
WBGene00010015	ENSG00000197785	WBGene00010015
WBGene00010035	ENSG00000138796	WBGene00010035
WBGene00010038	ENSG00000106615	WBGene00010038
WBGene00010040	ENSG00000132254	WBGene00010040
WBGene00010042	ENSG00000074582	WBGene00010042
WBGene00010044	ENSG00000129347	WBGene00010044
WBGene00010045	ENSG00000167994	WBGene00010045
WBGene00010052	ENSG00000105607	WBGene00010052
WBGene00010054	ENSG00000197265	WBGene00010054
WBGene00010055	ENSG00000180902	WBGene00010055
WBGene00010061	ENSG00000116830	WBGene00010061
WBGene00010062	ENSG00000107798	WBGene00010062
WBGene00010075	ENSG00000180398	WBGene00010075
WBGene00010077	ENSG00000148339	WBGene00010077
WBGene00010083	ENSG00000158125	WBGene00010083
WBGene00010089	ENSG00000072756	WBGene00010089
WBGene00010094	ENSG00000123297	WBGene00010094
WBGene00010097	ENSG00000167881	WBGene00010097
WBGene00010111	ENSG00000187231	WBGene00010111
WBGene00010115	ENSG00000131791	WBGene00010115
WBGene00010130	ENSG00000100554	WBGene00010130
WBGene00010131	ENSG00000008283	WBGene00010131
WBGene00010139	ENSG00000108829	WBGene00010139
WBGene00010160	ENSG00000151092	WBGene00010160
WBGene00010166	ENSG00000112699	WBGene00010166
WBGene00010178	ENSG00000174851	WBGene00010178
WBGene00010182	ENSG00000164073	WBGene00010182
WBGene00010197	ENSG00000101474	WBGene00010197
WBGene00010214	ENSG00000164037	WBGene00010214
WBGene00010232	ENSG00000006652	WBGene00010232
WBGene00010233	ENSG00000134453	WBGene00010233
WBGene00010260	ENSG00000100201	WBGene00010260
WBGene00010272	ENSG00000078053	WBGene00010272
WBGene00010279	ENSG00000168924	WBGene00010279
WBGene00010282	ENSG00000164073	WBGene00010282
WBGene00010283	ENSG00000122674	WBGene00010283
WBGene00010283	ENSG00000146574	WBGene00010283
WBGene00010284	ENSG00000196547	WBGene00010284
WBGene00010286	ENSG00000145293	WBGene00010286
WBGene00010296	ENSG00000166391	WBGene00010296
WBGene00010303	ENSG00000108561	WBGene00010303
WBGene00010304	ENSG00000172409	WBGene00010304
WBGene00010308	ENSG00000162066	WBGene00010308
WBGene00010317	ENSG00000138413	WBGene00010317
WBGene00010325	ENSG00000107371	WBGene00010325
WBGene00010326	ENSG00000140990	WBGene00010326
WBGene00010333	ENSG00000111481	WBGene00010333
WBGene00010336	ENSG00000161533	WBGene00010336
WBGene00010369	ENSG00000173575	WBGene00010369
[truncated: 1,824 more rows]

## Sheet: InParanoid
CE_WB_CURRENT	HS_ENSG	CE_WB_OLD	CE_WB_COMMENT
WBGene00000001	ENSG00000105647	WBGene00000001
WBGene00000001	ENSG00000117461	WBGene00000001
WBGene00000001	ENSG00000145675	WBGene00000001
WBGene00000002	ENSG00000092068	WBGene00000002
WBGene00000002	ENSG00000103257	WBGene00000002
WBGene00000004	ENSG00000092068	WBGene00000004
WBGene00000004	ENSG00000103257	WBGene00000004
WBGene00000018	ENSG00000097007	WBGene00000018
WBGene00000018	ENSG00000143322	WBGene00000018
WBGene00000020	ENSG00000064687	WBGene00000020
WBGene00000020	ENSG00000107331	WBGene00000020
WBGene00000020	ENSG00000144452	WBGene00000020
WBGene00000020	ENSG00000165029	WBGene00000020
WBGene00000020	ENSG00000179869	WBGene00000020
WBGene00000020	ENSG00000198691	WBGene00000020
WBGene00000022	ENSG00000167972	WBGene00000022
WBGene00000035	ENSG00000087085	WBGene00000035
WBGene00000035	ENSG00000114200	WBGene00000035
WBGene00000039	ENSG00000130234	WBGene00000039
WBGene00000040	ENSG00000122729	WBGene00000040
WBGene00000041	ENSG00000100412	WBGene00000041
WBGene00000058	ENSG00000166664	WBGene00000058
WBGene00000058	ENSG00000175344	WBGene00000058
WBGene00000060	ENSG00000129749	WBGene00000060
WBGene00000060	ENSG00000174343	WBGene00000060
WBGene00000063	ENSG00000075624	WBGene00000063
WBGene00000063	ENSG00000184009	WBGene00000063
WBGene00000064	ENSG00000075624	WBGene00000064
WBGene00000064	ENSG00000184009	WBGene00000064
WBGene00000065	ENSG00000075624	WBGene00000065
WBGene00000065	ENSG00000184009	WBGene00000065
WBGene00000066	ENSG00000075624	WBGene00000066
WBGene00000066	ENSG00000184009	WBGene00000066
WBGene00000068	ENSG00000162104	WBGene00000068
WBGene00000071	ENSG00000078295	WBGene00000071
WBGene00000071	ENSG00000155897	WBGene00000071
WBGene00000071	ENSG00000164742	WBGene00000071
WBGene00000071	ENSG00000173175	WBGene00000071
WBGene00000071	ENSG00000174233	WBGene00000071
WBGene00000072	ENSG00000075340	WBGene00000072
WBGene00000072	ENSG00000087274	WBGene00000072
WBGene00000072	ENSG00000148700	WBGene00000072
WBGene00000074	ENSG00000042980	WBGene00000074
WBGene00000074	ENSG00000135074	WBGene00000074
WBGene00000074	ENSG00000143537	WBGene00000074
WBGene00000074	ENSG00000148848	WBGene00000074
WBGene00000074	ENSG00000149451	WBGene00000074
WBGene00000074	ENSG00000151651	WBGene00000074
WBGene00000074	ENSG00000168615	WBGene00000074
WBGene00000075	ENSG00000151694	WBGene00000075
WBGene00000080	ENSG00000185736	WBGene00000080
WBGene00000080	ENSG00000197381	WBGene00000080
WBGene00000081	ENSG00000018510	WBGene00000081
WBGene00000086	ENSG00000110514	WBGene00000086
WBGene00000089	ENSG00000041353	WBGene00000089
WBGene00000089	ENSG00000069974	WBGene00000089
WBGene00000090	ENSG00000051382	WBGene00000090
WBGene00000090	ENSG00000105851	WBGene00000090
WBGene00000090	ENSG00000121879	WBGene00000090
WBGene00000090	ENSG00000171608	WBGene00000090
WBGene00000092	ENSG00000121957	WBGene00000092
WBGene00000092	ENSG00000160360	WBGene00000092
WBGene00000095	ENSG00000143437	WBGene00000095
WBGene00000095	ENSG00000172379	WBGene00000095
WBGene00000096	ENSG00000106546	WBGene00000096
WBGene00000097	ENSG00000158552	WBGene00000097
WBGene00000097	ENSG00000178381	WBGene00000097
WBGene00000099	ENSG00000087586	WBGene00000099
WBGene00000099	ENSG00000105146	WBGene00000099
WBGene00000099	ENSG00000178999	WBGene00000099
WBGene00000101	ENSG00000039319	WBGene00000101
WBGene00000101	ENSG00000157077	WBGene00000101
WBGene00000102	ENSG00000105221	WBGene00000102
WBGene00000102	ENSG00000117020	WBGene00000102
WBGene00000102	ENSG00000142208	WBGene00000102
WBGene00000102	ENSG00000275199	WBGene00000102
WBGene00000103	ENSG00000105221	WBGene00000103
WBGene00000103	ENSG00000117020	WBGene00000103
WBGene00000103	ENSG00000142208	WBGene00000103
WBGene00000103	ENSG00000275199	WBGene00000103
WBGene00000105	ENSG00000092847	WBGene00000105
WBGene00000105	ENSG00000123908	WBGene00000105
WBGene00000105	ENSG00000126070	WBGene00000105
WBGene00000105	ENSG00000134698	WBGene00000105
WBGene00000106	ENSG00000092847	WBGene00000106
WBGene00000106	ENSG00000123908	WBGene00000106
WBGene00000106	ENSG00000126070	WBGene00000106
WBGene00000106	ENSG00000134698	WBGene00000106
WBGene00000107	ENSG00000111275	WBGene00000107
WBGene00000107	ENSG00000137124	WBGene00000107
WBGene00000108	ENSG00000111275	WBGene00000108
WBGene00000108	ENSG00000137124	WBGene00000108
WBGene00000109	ENSG00000136010	WBGene00000109
WBGene00000109	ENSG00000144908	WBGene00000109
WBGene00000110	ENSG00000006534	WBGene00000110
WBGene00000110	ENSG00000072210	WBGene00000110
WBGene00000110	ENSG00000108602	WBGene00000110
WBGene00000111	ENSG00000006534	WBGene00000111
WBGene00000111	ENSG00000072210	WBGene00000111
WBGene00000111	ENSG00000108602	WBGene00000111
WBGene00000112	ENSG00000159423	WBGene00000112
WBGene00000113	ENSG00000112294	WBGene00000113
WBGene00000114	ENSG00000119711	WBGene00000114
WBGene00000115	ENSG00000164904	WBGene00000115
WBGene00000116	ENSG00000118514	WBGene00000116
WBGene00000117	ENSG00000143149	WBGene00000117
WBGene00000120	ENSG00000183684	WBGene00000120
WBGene00000121	ENSG00000183684	WBGene00000121
WBGene00000122	ENSG00000183684	WBGene00000122
WBGene00000123	ENSG00000181222	WBGene00000123
WBGene00000137	ENSG00000165097	WBGene00000137
WBGene00000139	ENSG00000088826	WBGene00000139
WBGene00000139	ENSG00000148832	WBGene00000139
WBGene00000140	ENSG00000054654	WBGene00000140
WBGene00000140	ENSG00000131018	WBGene00000140
WBGene00000142	ENSG00000142230	WBGene00000142
WBGene00000143	ENSG00000176248	WBGene00000143
WBGene00000145	ENSG00000141552	WBGene00000145
WBGene00000147	ENSG00000117362	WBGene00000147
WBGene00000147	ENSG00000138613	WBGene00000147
WBGene00000148	ENSG00000162736	WBGene00000148
WBGene00000149	ENSG00000084234	WBGene00000149
WBGene00000149	ENSG00000105290	WBGene00000149
WBGene00000155	ENSG00000108039	WBGene00000155
WBGene00000157	ENSG00000042753	WBGene00000157
WBGene00000158	ENSG00000166747	WBGene00000158
WBGene00000158	ENSG00000213983	WBGene00000158
WBGene00000159	ENSG00000106367	WBGene00000159
WBGene00000159	ENSG00000182287	WBGene00000159
WBGene00000160	ENSG00000006125	WBGene00000160
WBGene00000160	ENSG00000100280	WBGene00000160
WBGene00000161	ENSG00000183020	WBGene00000161
WBGene00000161	ENSG00000196961	WBGene00000161
WBGene00000162	ENSG00000065000	WBGene00000162
WBGene00000163	ENSG00000103723	WBGene00000163
WBGene00000163	ENSG00000132842	WBGene00000163
WBGene00000164	ENSG00000070718	WBGene00000164
WBGene00000164	ENSG00000185009	WBGene00000164
WBGene00000165	ENSG00000157823	WBGene00000165
WBGene00000165	ENSG00000177879	WBGene00000165
WBGene00000166	ENSG00000100083	WBGene00000166
WBGene00000166	ENSG00000103365	WBGene00000166
WBGene00000166	ENSG00000125447	WBGene00000166
WBGene00000170	ENSG00000103569	WBGene00000170
WBGene00000170	ENSG00000143595	WBGene00000170
WBGene00000170	ENSG00000165269	WBGene00000170
WBGene00000170	ENSG00000165272	WBGene00000170
WBGene00000170		WBGene00000170
WBGene00000171	ENSG00000103569	WBGene00000171
WBGene00000171	ENSG00000143595	WBGene00000171
WBGene00000171	ENSG00000165269	WBGene00000171
WBGene00000171	ENSG00000165272	WBGene00000171
WBGene00000171		WBGene00000171
WBGene00000172	ENSG00000103375	WBGene00000172
WBGene00000174	ENSG00000103375	WBGene00000174
WBGene00000175	ENSG00000103569	WBGene00000175
WBGene00000175	ENSG00000143595	WBGene00000175
WBGene00000175	ENSG00000165269	WBGene00000175
WBGene00000175	ENSG00000165272	WBGene00000175
WBGene00000175		WBGene00000175
WBGene00000177	ENSG00000178301	WBGene00000177
WBGene00000177	ENSG00000184945	WBGene00000177
WBGene00000177	ENSG00000185176	WBGene00000177
WBGene00000178	ENSG00000178301	WBGene00000178
WBGene00000178	ENSG00000184945	WBGene00000178
WBGene00000178	ENSG00000185176	WBGene00000178
WBGene00000180	ENSG00000113595	WBGene00000180
WBGene00000181	ENSG00000072506	WBGene00000181
WBGene00000182	ENSG00000134287	WBGene00000182
WBGene00000182	ENSG00000143761	WBGene00000182
WBGene00000183	ENSG00000004059	WBGene00000183
WBGene00000183	ENSG00000168374	WBGene00000183
WBGene00000184	ENSG00000165527	WBGene00000184
WBGene00000187	ENSG00000120805	WBGene00000187
WBGene00000188	ENSG00000138175	WBGene00000188
WBGene00000189	ENSG00000141748	WBGene00000189
WBGene00000189	ENSG00000162980	WBGene00000189
WBGene00000189	ENSG00000165997	WBGene00000189
WBGene00000192	ENSG00000134108	WBGene00000192
WBGene00000192	ENSG00000143862	WBGene00000192
WBGene00000193	ENSG00000113966	WBGene00000193
WBGene00000195	ENSG00000120500	WBGene00000195
WBGene00000195	ENSG00000130561	WBGene00000195
WBGene00000195	ENSG00000137486	WBGene00000195
WBGene00000195	ENSG00000141480	WBGene00000195
WBGene00000195	ENSG00000281857	WBGene00000195
WBGene00000197	ENSG00000090861	WBGene00000197
WBGene00000198	ENSG00000099797	WBGene00000198
WBGene00000198	ENSG00000205678	WBGene00000198
WBGene00000199	ENSG00000115091	WBGene00000199
WBGene00000199	ENSG00000133627	WBGene00000199
WBGene00000200	ENSG00000138071	WBGene00000200
WBGene00000201	ENSG00000130429	WBGene00000201
WBGene00000201	ENSG00000241685	WBGene00000201
WBGene00000203	ENSG00000111229	WBGene00000203
WBGene00000204	ENSG00000241553	WBGene00000204
WBGene00000205	ENSG00000136950	WBGene00000205
WBGene00000205	ENSG00000162704	WBGene00000205
WBGene00000206	ENSG00000116459	WBGene00000206
WBGene00000207	ENSG00000116459	WBGene00000207
WBGene00000208	ENSG00000103671	WBGene00000208
WBGene00000209	ENSG00000167283	WBGene00000209
WBGene00000209	ENSG00000249222	WBGene00000209
WBGene00000210	ENSG00000167283	WBGene00000210
WBGene00000210	ENSG00000249222	WBGene00000210
WBGene00000212	ENSG00000166311	WBGene00000212
WBGene00000217	ENSG00000117984	WBGene00000217
WBGene00000217	ENSG00000250644	WBGene00000217
WBGene00000222	ENSG00000118217	WBGene00000222
WBGene00000222	ENSG00000168468	WBGene00000222
WBGene00000222	ENSG00000213676	WBGene00000222
WBGene00000222	ENSG00000228628	WBGene00000222
WBGene00000222	ENSG00000234539	WBGene00000222
WBGene00000224	ENSG00000138079	WBGene00000224
WBGene00000225	ENSG00000138079	WBGene00000225
WBGene00000228	ENSG00000072110	WBGene00000228
WBGene00000228	ENSG00000077522	WBGene00000228
WBGene00000228	ENSG00000130402	WBGene00000228
WBGene00000228	ENSG00000248746	WBGene00000228
WBGene00000228	ENSG00000282844	WBGene00000228
WBGene00000229	ENSG00000110955	WBGene00000229
WBGene00000230	ENSG00000241837	WBGene00000230
WBGene00000231	ENSG00000168488	WBGene00000231
WBGene00000231	ENSG00000204842	WBGene00000231
WBGene00000235	ENSG00000175334	WBGene00000235
WBGene00000236	ENSG00000107262	WBGene00000236
WBGene00000240	ENSG00000171759	WBGene00000240
WBGene00000241	ENSG00000174483	WBGene00000241
WBGene00000242	ENSG00000125124	WBGene00000242
WBGene00000244	ENSG00000165533	WBGene00000244
WBGene00000246	ENSG00000122870	WBGene00000246
WBGene00000247	ENSG00000126581	WBGene00000247
WBGene00000247	ENSG00000196289	WBGene00000247
WBGene00000249	ENSG00000089685	WBGene00000249
WBGene00000251	ENSG00000133661	WBGene00000251
WBGene00000252	ENSG00000019169	WBGene00000252
WBGene00000253	ENSG00000137857	WBGene00000253
WBGene00000253	ENSG00000140279	WBGene00000253
WBGene00000256	ENSG00000019169	WBGene00000256
WBGene00000257	ENSG00000138160	WBGene00000257
WBGene00000265	ENSG00000138376	WBGene00000265
WBGene00000266	ENSG00000112699	WBGene00000266
WBGene00000269	ENSG00000086062	WBGene00000269
WBGene00000269	ENSG00000117411	WBGene00000269
WBGene00000269	ENSG00000158850	WBGene00000269
WBGene00000270	ENSG00000169255	WBGene00000270
WBGene00000271	ENSG00000185024	WBGene00000271
WBGene00000274	ENSG00000095564	WBGene00000274
WBGene00000276	ENSG00000112578	WBGene00000276
WBGene00000279	ENSG00000063180	WBGene00000279
WBGene00000279	ENSG00000154975	WBGene00000279
WBGene00000280	ENSG00000063180	WBGene00000280
WBGene00000280	ENSG00000154975	WBGene00000280
WBGene00000283	ENSG00000104267	WBGene00000283
WBGene00000283	ENSG00000133742	WBGene00000283
WBGene00000283	ENSG00000164879	WBGene00000283
WBGene00000283	ENSG00000168748	WBGene00000283
WBGene00000283	ENSG00000169239	WBGene00000283
WBGene00000283	ENSG00000174990	WBGene00000283
WBGene00000283	ENSG00000178538	WBGene00000283
WBGene00000283	ENSG00000185015	WBGene00000283
WBGene00000289	ENSG00000169071	WBGene00000289
WBGene00000289	ENSG00000185483	WBGene00000289
WBGene00000292	ENSG00000116489	WBGene00000292
WBGene00000292	ENSG00000198898	WBGene00000292
WBGene00000293	ENSG00000077549	WBGene00000293
WBGene00000295	ENSG00000036565	WBGene00000295
WBGene00000295	ENSG00000165646	WBGene00000295
WBGene00000298	ENSG00000131979	WBGene00000298
WBGene00000301	ENSG00000105974	WBGene00000301
WBGene00000301	ENSG00000182533	WBGene00000301
WBGene00000366	ENSG00000005339	WBGene00000366
WBGene00000366	ENSG00000100393	WBGene00000366
WBGene00000367	ENSG00000006283	WBGene00000367
WBGene00000367	ENSG00000100346	WBGene00000367
WBGene00000368	ENSG00000067191	WBGene00000368
WBGene00000368	ENSG00000165995	WBGene00000368
WBGene00000368	ENSG00000182389	WBGene00000368
WBGene00000369	ENSG00000155508	WBGene00000369
WBGene00000369	ENSG00000198791	WBGene00000369
WBGene00000371	ENSG00000135940	WBGene00000371
WBGene00000372	ENSG00000021461	WBGene00000372
WBGene00000372	ENSG00000059377	WBGene00000372
WBGene00000372	ENSG00000106258	WBGene00000372
WBGene00000372	ENSG00000160868	WBGene00000372
WBGene00000372	ENSG00000160870	WBGene00000372
WBGene00000373	ENSG00000073067	WBGene00000373
WBGene00000373	ENSG00000100197	WBGene00000373
WBGene00000373	ENSG00000155016	WBGene00000373
WBGene00000373	ENSG00000275211	WBGene00000373
WBGene00000375	ENSG00000019186	WBGene00000375
WBGene00000375	ENSG00000111012	WBGene00000375
WBGene00000375	ENSG00000135929	WBGene00000375
WBGene00000375	ENSG00000140459	WBGene00000375
WBGene00000376	ENSG00000113300	WBGene00000376
WBGene00000376	ENSG00000138767	WBGene00000376
WBGene00000377	ENSG00000120438	WBGene00000377
WBGene00000378	ENSG00000166226	WBGene00000378
WBGene00000379	ENSG00000115484	WBGene00000379
WBGene00000380	ENSG00000150753	WBGene00000380
WBGene00000381	ENSG00000132141	WBGene00000381
WBGene00000381	ENSG00000146731	WBGene00000381
WBGene00000382	ENSG00000094804	WBGene00000382
WBGene00000383	ENSG00000079335	WBGene00000383
WBGene00000383	ENSG00000081377	WBGene00000383
WBGene00000383		WBGene00000383
WBGene00000387	ENSG00000101224	WBGene00000387
WBGene00000387	ENSG00000158402	WBGene00000387
WBGene00000387	ENSG00000164045	WBGene00000387
WBGene00000390	ENSG00000070831	WBGene00000390
WBGene00000391	ENSG00000158825	WBGene00000391
WBGene00000392	ENSG00000158825	WBGene00000392
WBGene00000393	ENSG00000170385	WBGene00000393
WBGene00000393	ENSG00000196660	WBGene00000393
WBGene00000396	ENSG00000083857	WBGene00000396
WBGene00000396	ENSG00000086570	WBGene00000396
WBGene00000396	ENSG00000165323	WBGene00000396
WBGene00000396	ENSG00000282908	WBGene00000396
WBGene00000397	ENSG00000150275	WBGene00000397
WBGene00000401	ENSG00000081818	WBGene00000401
WBGene00000401	ENSG00000081842	WBGene00000401
WBGene00000401	ENSG00000081853	WBGene00000401
WBGene00000401	ENSG00000112852	WBGene00000401
WBGene00000401	ENSG00000113205	WBGene00000401
WBGene00000401	ENSG00000113209	WBGene00000401
WBGene00000401	ENSG00000113211	WBGene00000401
WBGene00000401	ENSG00000113212	WBGene00000401
WBGene00000401	ENSG00000113248	WBGene00000401
WBGene00000401	ENSG00000113555	WBGene00000401
WBGene00000401	ENSG00000118946	WBGene00000401
WBGene00000401	ENSG00000120322	WBGene00000401
WBGene00000401	ENSG00000120324	WBGene00000401
WBGene00000401	ENSG00000120327	WBGene00000401
WBGene00000401	ENSG00000120328	WBGene00000401
WBGene00000401	ENSG00000136099	WBGene00000401
WBGene00000401	ENSG00000138650	WBGene00000401
WBGene00000401	ENSG00000156453	WBGene00000401
WBGene00000401	ENSG00000165194	WBGene00000401
WBGene00000401	ENSG00000169851	WBGene00000401
WBGene00000401	ENSG00000171815	WBGene00000401
WBGene00000401	ENSG00000177839	WBGene00000401
WBGene00000401	ENSG00000184226	WBGene00000401
WBGene00000401	ENSG00000187372	WBGene00000401
WBGene00000401	ENSG00000189184	WBGene00000401
WBGene00000401	ENSG00000197479	WBGene00000401
WBGene00000401	ENSG00000204956	WBGene00000401
WBGene00000401	ENSG00000204961	WBGene00000401
WBGene00000401	ENSG00000204962	WBGene00000401
WBGene00000401	ENSG00000204963	WBGene00000401
WBGene00000401	ENSG00000204965	WBGene00000401
WBGene00000401	ENSG00000204967	WBGene00000401
WBGene00000401	ENSG00000204969	WBGene00000401
WBGene00000401	ENSG00000204970	WBGene00000401
WBGene00000401	ENSG00000239389	WBGene00000401
WBGene00000401	ENSG00000240184	WBGene00000401
WBGene00000401	ENSG00000240764	WBGene00000401
WBGene00000401	ENSG00000242419	WBGene00000401
WBGene00000401	ENSG00000243232	WBGene00000401
WBGene00000401	ENSG00000248383	WBGene00000401
WBGene00000401	ENSG00000249158	WBGene00000401
WBGene00000401	ENSG00000250120	WBGene00000401
WBGene00000401	ENSG00000251664	WBGene00000401
WBGene00000401	ENSG00000253159	WBGene00000401
WBGene00000401	ENSG00000253305	WBGene00000401
WBGene00000401	ENSG00000253485	WBGene00000401
WBGene00000401	ENSG00000253537	WBGene00000401
WBGene00000401	ENSG00000253731	WBGene00000401
WBGene00000401	ENSG00000253767	WBGene00000401
WBGene00000401	ENSG00000253846	WBGene00000401
WBGene00000401	ENSG00000253873	WBGene00000401
WBGene00000401	ENSG00000253910	WBGene00000401
WBGene00000401	ENSG00000253953	WBGene00000401
WBGene00000401	ENSG00000254122	WBGene00000401
WBGene00000401	ENSG00000254221	WBGene00000401
WBGene00000401	ENSG00000254245	WBGene00000401
WBGene00000401	ENSG00000255408	WBGene00000401
WBGene00000401	ENSG00000255622	WBGene00000401
WBGene00000401	ENSG00000261934	WBGene00000401
WBGene00000401	ENSG00000262209	WBGene00000401
WBGene00000401	ENSG00000262576	WBGene00000401
WBGene00000401	ENSG00000272674	WBGene00000401
WBGene00000401	ENSG00000273039	WBGene00000401
WBGene00000401	ENSG00000276547	WBGene00000401
WBGene00000401	ENSG00000280165	WBGene00000401
WBGene00000401		WBGene00000401
WBGene00000403	ENSG00000139182	WBGene00000403
WBGene00000403	ENSG00000158258	WBGene00000403
WBGene00000403	ENSG00000171603	WBGene00000403
WBGene00000405	ENSG00000170312	WBGene00000405
WBGene00000407	ENSG00000164885	WBGene00000407
WBGene00000408	ENSG00000134058	WBGene00000408
WBGene00000408	ENSG00000277273	WBGene00000408
WBGene00000409	ENSG00000132964	WBGene00000409
WBGene00000409	ENSG00000155111	WBGene00000409
WBGene00000410	ENSG00000136807	WBGene00000410
WBGene00000413	ENSG00000167513	WBGene00000413
WBGene00000415	ENSG00000145794	WBGene00000415
WBGene00000415	ENSG00000157890	WBGene00000415
WBGene00000415	ENSG00000187800	WBGene00000415
WBGene00000416	ENSG00000099942	WBGene00000416
WBGene00000416	ENSG00000167193	WBGene00000416
WBGene00000417	ENSG00000106144	WBGene00000417
WBGene00000419	ENSG00000088538	WBGene00000419
WBGene00000419	ENSG00000128512	WBGene00000419
WBGene00000419	ENSG00000134516	WBGene00000419
WBGene00000419	ENSG00000147459	WBGene00000419
WBGene00000419	ENSG00000150760	WBGene00000419
WBGene00000420	ENSG00000144366	WBGene00000420
WBGene00000422	ENSG00000171044	WBGene00000422
WBGene00000422	ENSG00000206579	WBGene00000422
WBGene00000422	ENSG00000260903	WBGene00000422
WBGene00000424	ENSG00000128340	WBGene00000424
WBGene00000424	ENSG00000136238	WBGene00000424
WBGene00000424	ENSG00000169750	WBGene00000424
WBGene00000426	ENSG00000062598	WBGene00000426
WBGene00000426	ENSG00000102890	WBGene00000426
WBGene00000426	ENSG00000155849	WBGene00000426
WBGene00000429	ENSG00000165066	WBGene00000429
WBGene00000431	ENSG00000028277	WBGene00000431
WBGene00000431	ENSG00000143190	WBGene00000431
WBGene00000435	ENSG00000100987	WBGene00000435
WBGene00000435	ENSG00000119614	WBGene00000435
WBGene00000436	ENSG00000106031	WBGene00000436
WBGene00000436	ENSG00000123364	WBGene00000436
WBGene00000436	ENSG00000128714	WBGene00000436
WBGene00000436	ENSG00000159184	WBGene00000436
WBGene00000437	ENSG00000105991	WBGene00000437
WBGene00000437	ENSG00000120094	WBGene00000437
WBGene00000437	ENSG00000128645	WBGene00000437
WBGene00000438	ENSG00000107187	WBGene00000438
WBGene00000438	ENSG00000121454	WBGene00000438
WBGene00000439	ENSG00000106006	WBGene00000439
WBGene00000439	ENSG00000108511	WBGene00000439
WBGene00000439	ENSG00000164900	WBGene00000439
WBGene00000439	ENSG00000170166	WBGene00000439
WBGene00000439	ENSG00000175879	WBGene00000439
WBGene00000439	ENSG00000182742	WBGene00000439
WBGene00000439	ENSG00000197576	WBGene00000439
WBGene00000439	ENSG00000198353	WBGene00000439
WBGene00000441	ENSG00000137709	WBGene00000441
WBGene00000441	ENSG00000185668	WBGene00000441
WBGene00000443	ENSG00000105717	WBGene00000443
WBGene00000443	ENSG00000167081	WBGene00000443
WBGene00000443	ENSG00000185630	WBGene00000443
WBGene00000443	ENSG00000204304	WBGene00000443
WBGene00000443	ENSG00000206315	WBGene00000443
WBGene00000443	ENSG00000224952	WBGene00000443
WBGene00000443	ENSG00000225987	WBGene00000443
WBGene00000443	ENSG00000232005	WBGene00000443
WBGene00000443	ENSG00000236353	WBGene00000443
WBGene00000443	ENSG00000237344	WBGene00000443
WBGene00000445	ENSG00000183072	WBGene00000445
WBGene00000447	ENSG00000125816	WBGene00000447
WBGene00000447	ENSG00000136352	WBGene00000447
WBGene00000449	ENSG00000169840	WBGene00000449
WBGene00000449	ENSG00000180613	WBGene00000449
WBGene00000451	ENSG00000125492	WBGene00000451
WBGene00000451	ENSG00000143032	WBGene00000451
WBGene00000452	ENSG00000125492	WBGene00000452
WBGene00000452	ENSG00000143032	WBGene00000452
WBGene00000454	ENSG00000126778	WBGene00000454
WBGene00000454	ENSG00000138083	WBGene00000454
WBGene00000454	ENSG00000170577	WBGene00000454
WBGene00000454	ENSG00000184302	WBGene00000454
WBGene00000463	ENSG00000006377	WBGene00000463
WBGene00000463	ENSG00000064195	WBGene00000463
WBGene00000463	ENSG00000105880	WBGene00000463
WBGene00000463	ENSG00000115844	WBGene00000463
WBGene00000463	ENSG00000144355	WBGene00000463
WBGene00000464	ENSG00000111249	WBGene00000464
WBGene00000464	ENSG00000257923	WBGene00000464
WBGene00000466	ENSG00000111880	WBGene00000466
WBGene00000473	ENSG00000006047	WBGene00000473
WBGene00000473	ENSG00000060138	WBGene00000473
WBGene00000473	ENSG00000065978	WBGene00000473
WBGene00000475	ENSG00000006047	WBGene00000475
WBGene00000475	ENSG00000060138	WBGene00000475
WBGene00000475	ENSG00000065978	WBGene00000475
WBGene00000476	ENSG00000116017	WBGene00000476
WBGene00000476	ENSG00000179361	WBGene00000476
WBGene00000476	ENSG00000205143	WBGene00000476
WBGene00000478	ENSG00000163251	WBGene00000478
WBGene00000478	ENSG00000177283	WBGene00000478
WBGene00000478	ENSG00000188763	WBGene00000478
WBGene00000479	ENSG00000110367	WBGene00000479
WBGene00000480	ENSG00000100226	WBGene00000480
WBGene00000482	ENSG00000111642	WBGene00000482
WBGene00000482	ENSG00000116254	WBGene00000482
WBGene00000482	ENSG00000170004	WBGene00000482
WBGene00000483	ENSG00000180532	WBGene00000483
WBGene00000484	ENSG00000068885	WBGene00000484
WBGene00000484	ENSG00000248710	WBGene00000484
WBGene00000485	ENSG00000187240	WBGene00000485
WBGene00000490	ENSG00000187535	WBGene00000490
WBGene00000491	ENSG00000198718	WBGene00000491
WBGene00000492	ENSG00000114446	WBGene00000492
WBGene00000493	ENSG00000140323	WBGene00000493
WBGene00000493	ENSG00000154309	WBGene00000493
WBGene00000498	ENSG00000149554	WBGene00000498
WBGene00000499	ENSG00000183765	WBGene00000499
WBGene00000500	ENSG00000103266	WBGene00000500
WBGene00000501	ENSG00000115665	WBGene00000501
WBGene00000502	ENSG00000110172	WBGene00000502
WBGene00000502	ENSG00000147166	WBGene00000502
WBGene00000503	ENSG00000064886	WBGene00000503
WBGene00000503	ENSG00000133048	WBGene00000503
WBGene00000503	ENSG00000133063	WBGene00000503
WBGene00000503	ENSG00000134216	WBGene00000503
WBGene00000506	ENSG00000112237	WBGene00000506
WBGene00000507	ENSG00000082258	WBGene00000507
WBGene00000507	ENSG00000129315	WBGene00000507
WBGene00000508	ENSG00000082258	WBGene00000508
WBGene00000508	ENSG00000129315	WBGene00000508
WBGene00000510	ENSG00000100288	WBGene00000510
WBGene00000510	ENSG00000110721	WBGene00000510
WBGene00000515	ENSG00000139163	WBGene00000515
WBGene00000515	ENSG00000143845	WBGene00000515
WBGene00000517	ENSG00000111276	WBGene00000517
WBGene00000518	ENSG00000004660	WBGene00000518
WBGene00000518	ENSG00000110931	WBGene00000518
WBGene00000519	ENSG00000196419	WBGene00000519
WBGene00000520	ENSG00000079246	WBGene00000520
WBGene00000521	ENSG00000174576	WBGene00000521
WBGene00000527	ENSG00000182871	WBGene00000527
WBGene00000527	ENSG00000204291	WBGene00000527
WBGene00000530	ENSG00000114859	WBGene00000530
WBGene00000530	ENSG00000188037	WBGene00000530
WBGene00000532	ENSG00000073464	WBGene00000532
WBGene00000532	ENSG00000109572	WBGene00000532
WBGene00000532	ENSG00000171365	WBGene00000532
WBGene00000533	ENSG00000103249	WBGene00000533
WBGene00000534	ENSG00000077984	WBGene00000534
WBGene00000534	ENSG00000101439	WBGene00000534
WBGene00000534	ENSG00000101441	WBGene00000534
WBGene00000534	ENSG00000125823	WBGene00000534
WBGene00000534	ENSG00000170367	WBGene00000534
WBGene00000534	ENSG00000170369	WBGene00000534
WBGene00000534	ENSG00000170373	WBGene00000534
WBGene00000534	ENSG00000175315	WBGene00000534
WBGene00000535	ENSG00000077984	WBGene00000535
WBGene00000535	ENSG00000101439	WBGene00000535
WBGene00000535	ENSG00000101441	WBGene00000535
WBGene00000535	ENSG00000125823	WBGene00000535
WBGene00000535	ENSG00000170367	WBGene00000535
WBGene00000535	ENSG00000170369	WBGene00000535
WBGene00000535	ENSG00000170373	WBGene00000535
WBGene00000535	ENSG00000175315	WBGene00000535
WBGene00000536	ENSG00000167186	WBGene00000536
WBGene00000537	ENSG00000100726	WBGene00000537
WBGene00000539	ENSG00000188603	WBGene00000539
WBGene00000540	ENSG00000188603	WBGene00000540
WBGene00000541	ENSG00000188603	WBGene00000541
WBGene00000542	ENSG00000014216	WBGene00000542
WBGene00000542	ENSG00000092529	WBGene00000542
WBGene00000542	ENSG00000135773	WBGene00000542
WBGene00000542	ENSG00000137225	WBGene00000542
WBGene00000542	ENSG00000162909	WBGene00000542
WBGene00000542	ENSG00000203697	WBGene00000542
WBGene00000543	ENSG00000131375	WBGene00000543
WBGene00000545	ENSG00000014216	WBGene00000545
WBGene00000545	ENSG00000092529	WBGene00000545
WBGene00000545	ENSG00000135773	WBGene00000545
WBGene00000545	ENSG00000137225	WBGene00000545
WBGene00000545	ENSG00000162909	WBGene00000545
WBGene00000545	ENSG00000203697	WBGene00000545
WBGene00000546	ENSG00000014216	WBGene00000546
WBGene00000546	ENSG00000092529	WBGene00000546
WBGene00000546	ENSG00000135773	WBGene00000546
WBGene00000546	ENSG00000137225	WBGene00000546
WBGene00000546	ENSG00000162909	WBGene00000546
WBGene00000546	ENSG00000203697	WBGene00000546
WBGene00000547	ENSG00000014216	WBGene00000547
WBGene00000547	ENSG00000092529	WBGene00000547
WBGene00000547	ENSG00000135773	WBGene00000547
WBGene00000547	ENSG00000137225	WBGene00000547
WBGene00000547	ENSG00000162909	WBGene00000547
WBGene00000547	ENSG00000203697	WBGene00000547
WBGene00000549	ENSG00000074054	WBGene00000549
WBGene00000549	ENSG00000163539	WBGene00000549
WBGene00000550	ENSG00000132361	WBGene00000550
WBGene00000552	ENSG00000143933	WBGene00000552
WBGene00000552	ENSG00000160014	WBGene00000552
WBGene00000552	ENSG00000198668	WBGene00000552
WBGene00000553	ENSG00000130822	WBGene00000553
WBGene00000553	ENSG00000134072	WBGene00000553
WBGene00000553	ENSG00000183049	WBGene00000553
WBGene00000554	ENSG00000188386	WBGene00000554
WBGene00000554	ENSG00000221823	WBGene00000554
WBGene00000561	ENSG00000123307	WBGene00000561
WBGene00000561	ENSG00000162992	WBGene00000561
WBGene00000561	ENSG00000164600	WBGene00000561
WBGene00000561	ENSG00000171532	WBGene00000561
WBGene00000564	ENSG00000142675	WBGene00000564
WBGene00000564	ENSG00000149970	WBGene00000564
WBGene00000565	ENSG00000072818	WBGene00000565
WBGene00000565	ENSG00000114331	WBGene00000565
WBGene00000565	ENSG00000131584	WBGene00000565
WBGene00000566	ENSG00000133612	WBGene00000566
WBGene00000566	ENSG00000135439	WBGene00000566
WBGene00000566	ENSG00000157985	WBGene00000566
WBGene00000566		WBGene00000566
WBGene00000567	ENSG00000127022	WBGene00000567
WBGene00000567	ENSG00000153132	WBGene00000567
WBGene00000583	ENSG00000186417	WBGene00000583
WBGene00000584	ENSG00000148826	WBGene00000584
WBGene00000584	ENSG00000163623	WBGene00000584
WBGene00000585	ENSG00000135775	WBGene00000585
WBGene00000591	ENSG00000164754	WBGene00000591
WBGene00000591	ENSG00000244588	WBGene00000591
WBGene00000594	ENSG00000019169	WBGene00000594
WBGene00000596	ENSG00000133661	WBGene00000596
WBGene00000597	ENSG00000133661	WBGene00000597
WBGene00000599	ENSG00000133661	WBGene00000599
WBGene00000601	ENSG00000019169	WBGene00000601
WBGene00000602	ENSG00000019169	WBGene00000602
WBGene00000603	ENSG00000019169	WBGene00000603
WBGene00000608	ENSG00000133661	WBGene00000608
WBGene00000611	ENSG00000019169	WBGene00000611
WBGene00000612	ENSG00000133661	WBGene00000612
WBGene00000614	ENSG00000133661	WBGene00000614
WBGene00000615	ENSG00000133661	WBGene00000615
WBGene00000616	ENSG00000133661	WBGene00000616
WBGene00000617	ENSG00000019169	WBGene00000617
WBGene00000618	ENSG00000133661	WBGene00000618
WBGene00000620	ENSG00000019169	WBGene00000620
WBGene00000622	ENSG00000019169	WBGene00000622
WBGene00000625	ENSG00000019169	WBGene00000625
WBGene00000626	ENSG00000133661	WBGene00000626
WBGene00000627	ENSG00000133661	WBGene00000627
WBGene00000631	ENSG00000133661	WBGene00000631
WBGene00000634	ENSG00000206561	WBGene00000634
WBGene00000636	ENSG00000133661	WBGene00000636
WBGene00000637	ENSG00000133661	WBGene00000637
WBGene00000638	ENSG00000133661	WBGene00000638
WBGene00000639	ENSG00000133661	WBGene00000639
WBGene00000640	ENSG00000133661	WBGene00000640
WBGene00000641	ENSG00000133661	WBGene00000641
WBGene00000644	ENSG00000019169	WBGene00000644
WBGene00000645	ENSG00000133661	WBGene00000645
WBGene00000647	ENSG00000206561	WBGene00000647
WBGene00000648	ENSG00000145861	WBGene00000648
WBGene00000648	ENSG00000163145	WBGene00000648
WBGene00000648	ENSG00000181092	WBGene00000648
WBGene00000648	ENSG00000182447	WBGene00000648
WBGene00000648	ENSG00000205863	WBGene00000648
WBGene00000648	ENSG00000240654	WBGene00000648
WBGene00000649	ENSG00000019169	WBGene00000649
WBGene00000650	ENSG00000206561	WBGene00000650
WBGene00000651	ENSG00000145861	WBGene00000651
WBGene00000651	ENSG00000163145	WBGene00000651
WBGene00000651	ENSG00000181092	WBGene00000651
WBGene00000651	ENSG00000182447	WBGene00000651
WBGene00000651	ENSG00000205863	WBGene00000651
WBGene00000651	ENSG00000240654	WBGene00000651
WBGene00000653	ENSG00000019169	WBGene00000653
WBGene00000654	ENSG00000019169	WBGene00000654
WBGene00000655	ENSG00000133661	WBGene00000655
WBGene00000656	ENSG00000133661	WBGene00000656
WBGene00000657	ENSG00000019169	WBGene00000657
WBGene00000659	ENSG00000206561	WBGene00000659
WBGene00000660	ENSG00000019169	WBGene00000660
WBGene00000661	ENSG00000133661	WBGene00000661
WBGene00000663	ENSG00000133661	WBGene00000663
WBGene00000664	ENSG00000133661	WBGene00000664
WBGene00000665	ENSG00000133661	WBGene00000665
WBGene00000666	ENSG00000133661	WBGene00000666
WBGene00000667	ENSG00000133661	WBGene00000667
WBGene00000668	ENSG00000133661	WBGene00000668
WBGene00000669	ENSG00000133661	WBGene00000669
WBGene00000670	ENSG00000019169	WBGene00000670
WBGene00000671	ENSG00000133661	WBGene00000671
WBGene00000675	ENSG00000019169	WBGene00000675
WBGene00000676	ENSG00000133661	WBGene00000676
WBGene00000678	ENSG00000145861	WBGene00000678
WBGene00000678	ENSG00000163145	WBGene00000678
WBGene00000678	ENSG00000181092	WBGene00000678
WBGene00000678	ENSG00000182447	WBGene00000678
WBGene00000678	ENSG00000205863	WBGene00000678
WBGene00000678	ENSG00000240654	WBGene00000678
WBGene00000679	ENSG00000019169	WBGene00000679
WBGene00000680	ENSG00000133661	WBGene00000680
WBGene00000681	ENSG00000133661	WBGene00000681
WBGene00000682	ENSG00000019169	WBGene00000682
WBGene00000685	ENSG00000145861	WBGene00000685
WBGene00000685	ENSG00000163145	WBGene00000685
WBGene00000685	ENSG00000181092	WBGene00000685
WBGene00000685	ENSG00000182447	WBGene00000685
WBGene00000685	ENSG00000205863	WBGene00000685
WBGene00000685	ENSG00000240654	WBGene00000685
WBGene00000687	ENSG00000145861	WBGene00000687
WBGene00000687	ENSG00000163145	WBGene00000687
WBGene00000687	ENSG00000181092	WBGene00000687
WBGene00000687	ENSG00000182447	WBGene00000687
WBGene00000687	ENSG00000205863	WBGene00000687
WBGene00000687	ENSG00000240654	WBGene00000687
WBGene00000690	ENSG00000133661	WBGene00000690
WBGene00000691	ENSG00000019169	WBGene00000691
WBGene00000692	ENSG00000133661	WBGene00000692
WBGene00000693	ENSG00000133661	WBGene00000693
WBGene00000694	ENSG00000019169	WBGene00000694
WBGene00000696	ENSG00000019169	WBGene00000696
WBGene00000697	ENSG00000206561	WBGene00000697
WBGene00000698	ENSG00000133661	WBGene00000698
WBGene00000699	ENSG00000019169	WBGene00000699
WBGene00000700	ENSG00000133661	WBGene00000700
WBGene00000701	ENSG00000133661	WBGene00000701
WBGene00000703	ENSG00000133661	WBGene00000703
WBGene00000704	ENSG00000133661	WBGene00000704
WBGene00000705	ENSG00000133661	WBGene00000705
WBGene00000706	ENSG00000133661	WBGene00000706
WBGene00000707	ENSG00000019169	WBGene00000707
WBGene00000708	ENSG00000049089	WBGene00000708
WBGene00000708	ENSG00000082293	WBGene00000708
WBGene00000708	ENSG00000092758	WBGene00000708
WBGene00000708	ENSG00000112280	WBGene00000708
WBGene00000710	ENSG00000019169	WBGene00000710
WBGene00000711	ENSG00000019169	WBGene00000711
WBGene00000713	ENSG00000133661	WBGene00000713
WBGene00000714	ENSG00000133661	WBGene00000714
WBGene00000715	ENSG00000133661	WBGene00000715
WBGene00000716	ENSG00000133661	WBGene00000716
WBGene00000717	ENSG00000133661	WBGene00000717
WBGene00000718	ENSG00000133661	WBGene00000718
WBGene00000719	ENSG00000133661	WBGene00000719
WBGene00000720	ENSG00000133661	WBGene00000720
WBGene00000721	ENSG00000133661	WBGene00000721
WBGene00000722	ENSG00000133661	WBGene00000722
WBGene00000723	ENSG00000133661	WBGene00000723
WBGene00000724	ENSG00000133661	WBGene00000724
WBGene00000725	ENSG00000133661	WBGene00000725
WBGene00000726	ENSG00000206561	WBGene00000726
WBGene00000727	ENSG00000019169	WBGene00000727
WBGene00000728	ENSG00000019169	WBGene00000728
WBGene00000729	ENSG00000133661	WBGene00000729
WBGene00000730	ENSG00000019169	WBGene00000730
WBGene00000731	ENSG00000206561	WBGene00000731
WBGene00000732	ENSG00000019169	WBGene00000732
WBGene00000733	ENSG00000019169	WBGene00000733
WBGene00000734	ENSG00000133661	WBGene00000734
WBGene00000735	ENSG00000133661	WBGene00000735
WBGene00000737	ENSG00000133661	WBGene00000737
WBGene00000738	ENSG00000019169	WBGene00000738
WBGene00000739	ENSG00000019169	WBGene00000739
WBGene00000740	ENSG00000019169	WBGene00000740
WBGene00000741	ENSG00000019169	WBGene00000741
WBGene00000742	ENSG00000019169	WBGene00000742
WBGene00000743	ENSG00000019169	WBGene00000743
WBGene00000744	ENSG00000019169	WBGene00000744
WBGene00000745	ENSG00000019169	WBGene00000745
WBGene00000746	ENSG00000019169	WBGene00000746
WBGene00000747	ENSG00000019169	WBGene00000747
WBGene00000748	ENSG00000133661	WBGene00000748
WBGene00000749	ENSG00000133661	WBGene00000749
WBGene00000751	ENSG00000019169	WBGene00000751
WBGene00000752	ENSG00000019169	WBGene00000752
WBGene00000753	ENSG00000019169	WBGene00000753
WBGene00000754	ENSG00000019169	WBGene00000754
WBGene00000755	ENSG00000145861	WBGene00000755
WBGene00000755	ENSG00000163145	WBGene00000755
WBGene00000755	ENSG00000181092	WBGene00000755
WBGene00000755	ENSG00000182447	WBGene00000755
WBGene00000755	ENSG00000205863	WBGene00000755
WBGene00000755	ENSG00000240654	WBGene00000755
WBGene00000757	ENSG00000133661	WBGene00000757
WBGene00000759	ENSG00000019169	WBGene00000759
WBGene00000761	ENSG00000148459	WBGene00000761
WBGene00000762	ENSG00000173085	WBGene00000762
WBGene00000763	ENSG00000132423	WBGene00000763
WBGene00000764	ENSG00000167113	WBGene00000764
WBGene00000765	ENSG00000110871	WBGene00000765
WBGene00000766	ENSG00000119723	WBGene00000766
WBGene00000767	ENSG00000123815	WBGene00000767
WBGene00000767	ENSG00000163050	WBGene00000767
WBGene00000768	ENSG00000102879	WBGene00000768
WBGene00000768	ENSG00000110880	WBGene00000768
WBGene00000768	ENSG00000167549	WBGene00000768
WBGene00000768	ENSG00000172725	WBGene00000768
WBGene00000773	ENSG00000101138	WBGene00000773
WBGene00000774	ENSG00000101811	WBGene00000774
WBGene00000774	ENSG00000177613	WBGene00000774
WBGene00000775	ENSG00000119125	WBGene00000775
WBGene00000776	ENSG00000135047	WBGene00000776
WBGene00000776	ENSG00000136943	WBGene00000776
WBGene00000778	ENSG00000117519	WBGene00000778
WBGene00000778	ENSG00000144834	WBGene00000778
WBGene00000778	ENSG00000149591	WBGene00000778
WBGene00000778	ENSG00000158710	WBGene00000778
WBGene00000785	ENSG00000164733	WBGene00000785
WBGene00000786	ENSG00000164733	WBGene00000786
WBGene00000787	ENSG00000167136	WBGene00000787
WBGene00000788	ENSG00000101160	WBGene00000788
WBGene00000792	ENSG00000134376	WBGene00000792
WBGene00000792	ENSG00000148204	WBGene00000792
WBGene00000793	ENSG00000115966	WBGene00000793
WBGene00000793	ENSG00000146592	WBGene00000793
WBGene00000793	ENSG00000170653	WBGene00000793
WBGene00000793	ENSG00000267281	WBGene00000793
WBGene00000794	ENSG00000168496	WBGene00000794
WBGene00000795	ENSG00000147687	WBGene00000795
WBGene00000796	ENSG00000171824	WBGene00000796
WBGene00000798	ENSG00000077348	WBGene00000798
WBGene00000799	ENSG00000137976	WBGene00000799
WBGene00000800	ENSG00000110619	WBGene00000800
WBGene00000800	ENSG00000278191	WBGene00000800
WBGene00000802	ENSG00000179218	WBGene00000802
WBGene00000812	ENSG00000007264	WBGene00000812
WBGene00000812	ENSG00000103653	WBGene00000812
WBGene00000813	ENSG00000169727	WBGene00000813
WBGene00000814	ENSG00000166200	WBGene00000814
WBGene00000815	ENSG00000141030	WBGene00000815
WBGene00000816	ENSG00000138663	WBGene00000816
WBGene00000817	ENSG00000121022	WBGene00000817
WBGene00000818	ENSG00000168090	WBGene00000818
WBGene00000819	ENSG00000137752	WBGene00000819
WBGene00000819	ENSG00000137757	WBGene00000819
WBGene00000819	ENSG00000196954	WBGene00000819
WBGene00000819	ENSG00000204403	WBGene00000819
WBGene00000822	ENSG00000118729	WBGene00000822
WBGene00000822	ENSG00000143318	WBGene00000822
WBGene00000829	ENSG00000198727	WBGene00000829
WBGene00000830	ENSG00000121691	WBGene00000830
WBGene00000831	ENSG00000121691	WBGene00000831
WBGene00000832	ENSG00000119326	WBGene00000832
WBGene00000833	ENSG00000062485	WBGene00000833
WBGene00000834	ENSG00000123191	WBGene00000834
WBGene00000834	ENSG00000165240	WBGene00000834
WBGene00000835	ENSG00000177556	WBGene00000835
WBGene00000836	ENSG00000055130	WBGene00000836
WBGene00000837	ENSG00000108094	WBGene00000837
WBGene00000838	ENSG00000036257	WBGene00000838
WBGene00000840	ENSG00000166266	WBGene00000840
WBGene00000843	ENSG00000136986	WBGene00000843
WBGene00000846	ENSG00000055732	WBGene00000846
WBGene00000846	ENSG00000090674	WBGene00000846
WBGene00000846	ENSG00000153898	WBGene00000846
WBGene00000854	ENSG00000197976	WBGene00000854
WBGene00000857	ENSG00000108379	WBGene00000857
WBGene00000857	ENSG00000134245	WBGene00000857
WBGene00000857	ENSG00000154342	WBGene00000857
WBGene00000857	ENSG00000154764	WBGene00000857
WBGene00000857	ENSG00000162552	WBGene00000857
WBGene00000857	ENSG00000188064	WBGene00000857
WBGene00000857	ENSG00000277626	WBGene00000857
WBGene00000857	ENSG00000277641	WBGene00000857
WBGene00000858	ENSG00000111186	WBGene00000858
WBGene00000858	ENSG00000114251	WBGene00000858
WBGene00000863	ENSG00000133101	WBGene00000863
WBGene00000863	ENSG00000145386	WBGene00000863
WBGene00000865	ENSG00000134057	WBGene00000865
WBGene00000865	ENSG00000157456	WBGene00000865
WBGene00000866	ENSG00000134057	WBGene00000866
WBGene00000866	ENSG00000157456	WBGene00000866
WBGene00000867	ENSG00000134057	WBGene00000867
WBGene00000867	ENSG00000157456	WBGene00000867
WBGene00000869	ENSG00000179091	WBGene00000869
WBGene00000870	ENSG00000110092	WBGene00000870
WBGene00000870	ENSG00000112576	WBGene00000870
WBGene00000870	ENSG00000118971	WBGene00000870
WBGene00000871	ENSG00000105173	WBGene00000871
WBGene00000871	ENSG00000175305	WBGene00000871
WBGene00000872	ENSG00000131504	WBGene00000872
WBGene00000872	ENSG00000139734	WBGene00000872
WBGene00000872	ENSG00000147202	WBGene00000872
WBGene00000874	ENSG00000129204	WBGene00000874
WBGene00000874	ENSG00000170832	WBGene00000874
WBGene00000875	ENSG00000161800	WBGene00000875
WBGene00000876	ENSG00000163660	WBGene00000876
WBGene00000876	ENSG00000221978	WBGene00000876
WBGene00000877	ENSG00000108179	WBGene00000877
WBGene00000877	ENSG00000196262	WBGene00000877
WBGene00000877	ENSG00000236334	WBGene00000877
WBGene00000877	ENSG00000256374	WBGene00000877
WBGene00000877	ENSG00000263353	WBGene00000877
WBGene00000877	ENSG00000263464	WBGene00000877
WBGene00000878	ENSG00000108179	WBGene00000878
WBGene00000878	ENSG00000196262	WBGene00000878
WBGene00000878	ENSG00000236334	WBGene00000878
WBGene00000878	ENSG00000256374	WBGene00000878
WBGene00000878	ENSG00000263353	WBGene00000878
WBGene00000878	ENSG00000263464	WBGene00000878
WBGene00000879	ENSG00000108179	WBGene00000879
WBGene00000879	ENSG00000196262	WBGene00000879
WBGene00000879	ENSG00000236334	WBGene00000879
WBGene00000879	ENSG00000256374	WBGene00000879
WBGene00000879	ENSG00000263353	WBGene00000879
WBGene00000879	ENSG00000263464	WBGene00000879
WBGene00000880	ENSG00000100023	WBGene00000880
WBGene00000881	ENSG00000166794	WBGene00000881
WBGene00000882	ENSG00000166794	WBGene00000882
WBGene00000883	ENSG00000108179	WBGene00000883
WBGene00000883	ENSG00000196262	WBGene00000883
WBGene00000883	ENSG00000236334	WBGene00000883
WBGene00000883	ENSG00000256374	WBGene00000883
WBGene00000883	ENSG00000263353	WBGene00000883
WBGene00000883	ENSG00000263464	WBGene00000883
WBGene00000884	ENSG00000138398	WBGene00000884
WBGene00000886	ENSG00000240344	WBGene00000886
WBGene00000887	ENSG00000171960	WBGene00000887
WBGene00000888	ENSG00000137168	WBGene00000888
WBGene00000889	ENSG00000084072	WBGene00000889
WBGene00000890	ENSG00000131013	WBGene00000890
WBGene00000891	ENSG00000113593	WBGene00000891
WBGene00000892	ENSG00000153015	WBGene00000892
WBGene00000896	ENSG00000129562	WBGene00000896
WBGene00000897	ENSG00000106799	WBGene00000897
WBGene00000897	ENSG00000115170	WBGene00000897
WBGene00000897	ENSG00000123612	WBGene00000897
WBGene00000897	ENSG00000135503	WBGene00000897
WBGene00000897	ENSG00000139567	WBGene00000897
WBGene00000898	ENSG00000027644	WBGene00000898
WBGene00000898	ENSG00000140443	WBGene00000898
WBGene00000898	ENSG00000171105	WBGene00000898
WBGene00000900	ENSG00000114739	WBGene00000900
WBGene00000900	ENSG00000121989	WBGene00000900
WBGene00000900	ENSG00000163513	WBGene00000900
WBGene00000903	ENSG00000135414	WBGene00000903
WBGene00000903	ENSG00000138379	WBGene00000903
WBGene00000906	ENSG00000163913	WBGene00000906
WBGene00000908	ENSG00000012504	WBGene00000908
WBGene00000908	ENSG00000025434	WBGene00000908
WBGene00000908	ENSG00000077092	WBGene00000908
WBGene00000908	ENSG00000131408	WBGene00000908
WBGene00000908	ENSG00000131759	WBGene00000908
WBGene00000908	ENSG00000151090	WBGene00000908
WBGene00000908	ENSG00000172819	WBGene00000908
WBGene00000911	ENSG00000141564	WBGene00000911
WBGene00000914	ENSG00000080298	WBGene00000914
WBGene00000914	ENSG00000087903	WBGene00000914
WBGene00000914	ENSG00000132005	WBGene00000914
WBGene00000915	ENSG00000080824	WBGene00000915
WBGene00000915	ENSG00000096384	WBGene00000915
WBGene00000917	ENSG00000106524	WBGene00000917
WBGene00000923	ENSG00000102030	WBGene00000923
WBGene00000923	ENSG00000156269	WBGene00000923
WBGene00000929	ENSG00000065911	WBGene00000929
WBGene00000929	ENSG00000163738	WBGene00000929
WBGene00000931	ENSG00000166197	WBGene00000931
WBGene00000933	ENSG00000132676	WBGene00000933
WBGene00000934	ENSG00000103546	WBGene00000934
WBGene00000934	ENSG00000142319	WBGene00000934
WBGene00000934	ENSG00000276996	WBGene00000934
WBGene00000936	ENSG00000101144	WBGene00000936
WBGene00000936	ENSG00000112175	WBGene00000936
WBGene00000936	ENSG00000116985	WBGene00000936
WBGene00000936	ENSG00000153162	WBGene00000936
WBGene00000936	ENSG00000183682	WBGene00000936
WBGene00000937	ENSG00000138231	WBGene00000937
WBGene00000938	ENSG00000143614	WBGene00000938
WBGene00000938	ENSG00000167491	WBGene00000938
WBGene00000938	ENSG00000261992	WBGene00000938
WBGene00000939	ENSG00000100697	WBGene00000939
WBGene00000940	ENSG00000110063	WBGene00000940
WBGene00000941	ENSG00000126953	WBGene00000941
WBGene00000941	ENSG00000150779	WBGene00000941
WBGene00000942	ENSG00000035403	WBGene00000942
WBGene00000950	ENSG00000111319	WBGene00000950
WBGene00000950	ENSG00000162572	WBGene00000950
WBGene00000950	ENSG00000166828	WBGene00000950
WBGene00000950	ENSG00000168447	WBGene00000950
WBGene00000952	ENSG00000111319	WBGene00000952
WBGene00000952	ENSG00000162572	WBGene00000952
WBGene00000952	ENSG00000166828	WBGene00000952
WBGene00000952	ENSG00000168447	WBGene00000952
WBGene00000958	ENSG00000145214	WBGene00000958
WBGene00000959	ENSG00000153933	WBGene00000959
WBGene00000960	ENSG00000058866	WBGene00000960
WBGene00000960	ENSG00000065357	WBGene00000960
WBGene00000960	ENSG00000136267	WBGene00000960
WBGene00000961	ENSG00000173402	WBGene00000961
WBGene00000962	ENSG00000197102	WBGene00000962
WBGene00000963	ENSG00000072832	WBGene00000963
WBGene00000963	ENSG00000092964	WBGene00000963
WBGene00000963	ENSG00000113657	WBGene00000963
WBGene00000963	ENSG00000147647	WBGene00000963
WBGene00000964	ENSG00000072832	WBGene00000964
WBGene00000964	ENSG00000092964	WBGene00000964
WBGene00000964	ENSG00000113657	WBGene00000964
WBGene00000964	ENSG00000147647	WBGene00000964
WBGene00000966	ENSG00000025423	WBGene00000966
WBGene00000966	ENSG00000073737	WBGene00000966
WBGene00000966	ENSG00000135437	WBGene00000966
WBGene00000966	ENSG00000139547	WBGene00000966
WBGene00000966	ENSG00000170426	WBGene00000966
WBGene00000967	ENSG00000170786	WBGene00000967
WBGene00000970	ENSG00000119471	WBGene00000970
WBGene00000971	ENSG00000186153	WBGene00000971
WBGene00000972	ENSG00000186153	WBGene00000972
WBGene00000973	ENSG00000157379	WBGene00000973
WBGene00000974	ENSG00000112474	WBGene00000974
WBGene00000974	ENSG00000204228	WBGene00000974
WBGene00000974	ENSG00000225312	WBGene00000974
WBGene00000974	ENSG00000228357	WBGene00000974
WBGene00000974	ENSG00000228712	WBGene00000974
WBGene00000974	ENSG00000232357	WBGene00000974
WBGene00000976	ENSG00000100867	WBGene00000976
WBGene00000976	ENSG00000157326	WBGene00000976
WBGene00000976	ENSG00000187630	WBGene00000976
WBGene00000976		WBGene00000976
WBGene00000977	ENSG00000087076	WBGene00000977
WBGene00000978	ENSG00000087076	WBGene00000978
WBGene00000979	ENSG00000025423	WBGene00000979
WBGene00000979	ENSG00000073737	WBGene00000979
WBGene00000979	ENSG00000135437	WBGene00000979
WBGene00000979	ENSG00000139547	WBGene00000979
WBGene00000979	ENSG00000170426	WBGene00000979
WBGene00000981	ENSG00000119471	WBGene00000981
WBGene00000982	ENSG00000170786	WBGene00000982
WBGene00000983	ENSG00000025423	WBGene00000983
WBGene00000983	ENSG00000073737	WBGene00000983
WBGene00000983	ENSG00000135437	WBGene00000983
WBGene00000983	ENSG00000139547	WBGene00000983
WBGene00000983	ENSG00000170426	WBGene00000983
WBGene00000984	ENSG00000169738	WBGene00000984
WBGene00000985	ENSG00000072042	WBGene00000985
WBGene00000985	ENSG00000139988	WBGene00000985
WBGene00000985	ENSG00000160439	WBGene00000985
WBGene00000985	ENSG00000167536	WBGene00000985
WBGene00000985	ENSG00000240857	WBGene00000985
WBGene00000985	ENSG00000273944	WBGene00000985
WBGene00000985	ENSG00000274418	WBGene00000985
WBGene00000985	ENSG00000274504	WBGene00000985
WBGene00000985	ENSG00000275474	WBGene00000985
WBGene00000985	ENSG00000276341	WBGene00000985
WBGene00000985	ENSG00000276684	WBGene00000985
WBGene00000985	ENSG00000276826	WBGene00000985
WBGene00000985	ENSG00000278149	WBGene00000985
WBGene00000985	ENSG00000278284	WBGene00000985
WBGene00000986	ENSG00000087076	WBGene00000986
WBGene00000988	ENSG00000112474	WBGene00000988
WBGene00000988	ENSG00000204228	WBGene00000988
WBGene00000988	ENSG00000225312	WBGene00000988
WBGene00000988	ENSG00000228357	WBGene00000988
WBGene00000988	ENSG00000228712	WBGene00000988
WBGene00000988	ENSG00000232357	WBGene00000988
WBGene00000989	ENSG00000157379	WBGene00000989
WBGene00000993	ENSG00000109016	WBGene00000993
WBGene00000993	ENSG00000184544	WBGene00000993
WBGene00000994	ENSG00000102786	WBGene00000994
WBGene00000994	ENSG00000165359	WBGene00000994
WBGene00000996	ENSG00000178537	WBGene00000996
WBGene00001001	ENSG00000083520	WBGene00001001
WBGene00001002	ENSG00000014138	WBGene00001002
WBGene00001005	ENSG00000264364	WBGene00001005
WBGene00001006	ENSG00000075711	WBGene00001006
WBGene00001006	ENSG00000082458	WBGene00001006
WBGene00001006	ENSG00000132535	WBGene00001006
WBGene00001006	ENSG00000150672	WBGene00001006
WBGene00001007	ENSG00000135720	WBGene00001007
WBGene00001007	ENSG00000144635	WBGene00001007
WBGene00001008	ENSG00000073803	WBGene00001008
WBGene00001008	ENSG00000139625	WBGene00001008
WBGene00001016	ENSG00000138346	WBGene00001016
WBGene00001017	ENSG00000204843	WBGene00001017
WBGene00001018	ENSG00000175203	WBGene00001018
WBGene00001019	ENSG00000148719	WBGene00001019
WBGene00001019	ENSG00000164031	WBGene00001019
WBGene00001020	ENSG00000059769	WBGene00001020
WBGene00001022	ENSG00000110011	WBGene00001022
WBGene00001025	ENSG00000102580	WBGene00001025
WBGene00001026	ENSG00000116138	WBGene00001026
WBGene00001027	ENSG00000007923	WBGene00001027
WBGene00001028	ENSG00000103423	WBGene00001028
WBGene00001028	ENSG00000276726	WBGene00001028
WBGene00001029	ENSG00000105821	WBGene00001029
WBGene00001030	ENSG00000086061	WBGene00001030
WBGene00001030	ENSG00000140403	WBGene00001030
WBGene00001031	ENSG00000132002	WBGene00001031
WBGene00001031	ENSG00000137094	WBGene00001031
WBGene00001031	ENSG00000162616	WBGene00001031
WBGene00001032	ENSG00000101152	WBGene00001032
WBGene00001032	ENSG00000147570	WBGene00001032
WBGene00001032	ENSG00000163793	WBGene00001032
WBGene00001033	ENSG00000100209	WBGene00001033
WBGene00001035	ENSG00000168724	WBGene00001035
WBGene00001036	ENSG00000128590	WBGene00001036
WBGene00001037	ENSG00000069345	WBGene00001037
WBGene00001038	ENSG00000090520	WBGene00001038
WBGene00001039	ENSG00000120675	WBGene00001039
WBGene00001039	ENSG00000205981	WBGene00001039
WBGene00001040	ENSG00000104129	WBGene00001040
WBGene00001041	ENSG00000213551	WBGene00001041
WBGene00001042	ENSG00000105993	WBGene00001042
WBGene00001042	ENSG00000135924	WBGene00001042
WBGene00001042	ENSG00000172404	WBGene00001042
WBGene00001042	ENSG00000179407	WBGene00001042
WBGene00001043	ENSG00000116675	WBGene00001043
WBGene00001043	ENSG00000178950	WBGene00001043
WBGene00001045	ENSG00000077232	WBGene00001045
WBGene00001046	ENSG00000102580	WBGene00001046
WBGene00001047	ENSG00000025796	WBGene00001047
WBGene00001048	ENSG00000126698	WBGene00001048
WBGene00001049	ENSG00000136492	WBGene00001049
WBGene00001050	ENSG00000204348	WBGene00001050
WBGene00001050	ENSG00000206346	WBGene00001050
WBGene00001050	ENSG00000224313	WBGene00001050
WBGene00001050	ENSG00000225682	WBGene00001050
WBGene00001050	ENSG00000234798	WBGene00001050
WBGene00001050	ENSG00000236765	WBGene00001050
WBGene00001051	ENSG00000173207	WBGene00001051
WBGene00001052	ENSG00000222040	WBGene00001052
WBGene00001053	ENSG00000149295	WBGene00001053
WBGene00001053	ENSG00000151577	WBGene00001053
WBGene00001054	ENSG00000130226	WBGene00001054
WBGene00001054	ENSG00000175497	WBGene00001054
WBGene00001054	ENSG00000282974	WBGene00001054
WBGene00001055	ENSG00000078098	WBGene00001055
WBGene00001055	ENSG00000197635	WBGene00001055
WBGene00001056	ENSG00000074603	WBGene00001056
WBGene00001056	ENSG00000142002	WBGene00001056
WBGene00001058	ENSG00000164062	WBGene00001058
WBGene00001064	ENSG00000019169	WBGene00001064
WBGene00001065	ENSG00000145861	WBGene00001065
WBGene00001065	ENSG00000163145	WBGene00001065
WBGene00001065	ENSG00000181092	WBGene00001065
WBGene00001065	ENSG00000182447	WBGene00001065
WBGene00001065	ENSG00000205863	WBGene00001065
WBGene00001065	ENSG00000240654	WBGene00001065
WBGene00001066	ENSG00000019169	WBGene00001066
WBGene00001067	ENSG00000133661	WBGene00001067
WBGene00001069	ENSG00000133661	WBGene00001069
WBGene00001073	ENSG00000139921	WBGene00001073
WBGene00001074	ENSG00000145861	WBGene00001074
WBGene00001074	ENSG00000163145	WBGene00001074
WBGene00001074	ENSG00000181092	WBGene00001074
WBGene00001074	ENSG00000182447	WBGene00001074
WBGene00001074	ENSG00000205863	WBGene00001074
WBGene00001074	ENSG00000240654	WBGene00001074
WBGene00001075	ENSG00000019169	WBGene00001075
WBGene00001076	ENSG00000206561	WBGene00001076
WBGene00001077	ENSG00000072682	WBGene00001077
WBGene00001077	ENSG00000122884	WBGene00001077
WBGene00001078	ENSG00000173852	WBGene00001078
WBGene00001078	ENSG00000177990	WBGene00001078
WBGene00001080	ENSG00000081019	WBGene00001080
WBGene00001080	ENSG00000187257	WBGene00001080
WBGene00001081	ENSG00000144893	WBGene00001081
WBGene00001081	ENSG00000184634	WBGene00001081
WBGene00001082	ENSG00000161203	WBGene00001082
WBGene00001087	ENSG00000010292	WBGene00001087
WBGene00001089	ENSG00000138081	WBGene00001089
WBGene00001090	ENSG00000107201	WBGene00001090
WBGene00001090	ENSG00000115267	WBGene00001090
WBGene00001092	ENSG00000117505	WBGene00001092
WBGene00001093	ENSG00000087470	WBGene00001093
WBGene00001094	ENSG00000115866	WBGene00001094
WBGene00001095	ENSG00000117593	WBGene00001095
WBGene00001096	ENSG00000052850	WBGene00001096
WBGene00001096	ENSG00000134438	WBGene00001096
WBGene00001096	ENSG00000156150	WBGene00001096
WBGene00001096	ENSG00000180318	WBGene00001096
WBGene00001101	ENSG00000004975	WBGene00001101
WBGene00001101	ENSG00000107404	WBGene00001101
WBGene00001101	ENSG00000161202	WBGene00001101
WBGene00001101		WBGene00001101
WBGene00001102	ENSG00000004975	WBGene00001102
WBGene00001102	ENSG00000107404	WBGene00001102
WBGene00001102	ENSG00000161202	WBGene00001102
WBGene00001102		WBGene00001102
WBGene00001106	ENSG00000255168	WBGene00001106
WBGene00001106	ENSG00000264343	WBGene00001106
WBGene00001115	ENSG00000134769	WBGene00001115
WBGene00001115	ENSG00000138101	WBGene00001115
WBGene00001117	ENSG00000196659	WBGene00001117
WBGene00001117	ENSG00000197557	WBGene00001117
WBGene00001118	ENSG00000157796	WBGene00001118
WBGene00001119	ENSG00000103351	WBGene00001119
WBGene00001121	ENSG00000111837	WBGene00001121
WBGene00001121	ENSG00000112144	WBGene00001121
WBGene00001127	ENSG00000204104	WBGene00001127
WBGene00001129	ENSG00000105948	WBGene00001129
WBGene00001130	ENSG00000079805	WBGene00001130
WBGene00001130	ENSG00000106976	WBGene00001130
WBGene00001130	ENSG00000197959	WBGene00001130
WBGene00001131	ENSG00000152818	WBGene00001131
WBGene00001131	ENSG00000198947	WBGene00001131
WBGene00001132	ENSG00000122367	WBGene00001132
WBGene00001132	ENSG00000163110	WBGene00001132
WBGene00001134	ENSG00000198836	WBGene00001134
WBGene00001135	ENSG00000091664	WBGene00001135
WBGene00001135	ENSG00000104888	WBGene00001135
WBGene00001135	ENSG00000179520	WBGene00001135
WBGene00001137	ENSG00000018625	WBGene00001137
WBGene00001137	ENSG00000105409	WBGene00001137
WBGene00001137	ENSG00000132681	WBGene00001137
WBGene00001137	ENSG00000163399	WBGene00001137
WBGene00001149	ENSG00000060982	WBGene00001149
WBGene00001149	ENSG00000105552	WBGene00001149
WBGene00001150	ENSG00000084754	WBGene00001150
WBGene00001151	ENSG00000134463	WBGene00001151
WBGene00001153	ENSG00000198721	WBGene00001153
WBGene00001154	ENSG00000121310	WBGene00001154
WBGene00001154	ENSG00000148090	WBGene00001154
WBGene00001155	ENSG00000127884	WBGene00001155
WBGene00001160	ENSG00000103319	WBGene00001160
WBGene00001161	ENSG00000133740	WBGene00001161
WBGene00001161	ENSG00000205250	WBGene00001161
WBGene00001163	ENSG00000108947	WBGene00001163
WBGene00001166	ENSG00000108883	WBGene00001166
WBGene00001167	ENSG00000167658	WBGene00001167
WBGene00001168	ENSG00000101210	WBGene00001168
WBGene00001168	ENSG00000156508	WBGene00001168
WBGene00001168		WBGene00001168
WBGene00001169	ENSG00000101210	WBGene00001169
WBGene00001169	ENSG00000156508	WBGene00001169
WBGene00001169		WBGene00001169
WBGene00001171	ENSG00000140015	WBGene00001171
WBGene00001171	ENSG00000143473	WBGene00001171
WBGene00001172	ENSG00000125851	WBGene00001172
WBGene00001173	ENSG00000185532	WBGene00001173
WBGene00001177	ENSG00000101333	WBGene00001177
WBGene00001179	ENSG00000182732	WBGene00001179
WBGene00001179	ENSG00000182901	WBGene00001179
WBGene00001184	ENSG00000066468	WBGene00001184
WBGene00001184	ENSG00000068078	WBGene00001184
WBGene00001184	ENSG00000077782	WBGene00001184
WBGene00001184	ENSG00000160867	WBGene00001184
WBGene00001187	ENSG00000081248	WBGene00001187
WBGene00001187	ENSG00000102001	WBGene00001187
WBGene00001187	ENSG00000151067	WBGene00001187
WBGene00001187	ENSG00000157388	WBGene00001187
WBGene00001188	ENSG00000002745	WBGene00001188
WBGene00001189	ENSG00000088882	WBGene00001189
WBGene00001189	ENSG00000109472	WBGene00001189
WBGene00001189	ENSG00000109625	WBGene00001189
WBGene00001189	ENSG00000120054	WBGene00001189
WBGene00001189	ENSG00000121898	WBGene00001189
WBGene00001194	ENSG00000111676	WBGene00001194
WBGene00001194	ENSG00000142599	WBGene00001194
WBGene00001196	ENSG00000088256	WBGene00001196
WBGene00001196	ENSG00000156052	WBGene00001196
WBGene00001202	ENSG00000116396	WBGene00001202
WBGene00001202	ENSG00000129159	WBGene00001202
WBGene00001202	ENSG00000131398	WBGene00001202
WBGene00001202	ENSG00000166006	WBGene00001202
WBGene00001207	ENSG00000085276	WBGene00001207
WBGene00001207	ENSG00000142611	WBGene00001207
WBGene00001208	ENSG00000007866	WBGene00001208
WBGene00001208	ENSG00000074219	WBGene00001208
WBGene00001208	ENSG00000187079	WBGene00001208
WBGene00001208	ENSG00000197905	WBGene00001208
WBGene00001209	ENSG00000107581	WBGene00001209
WBGene00001215	ENSG00000076201	WBGene00001215
WBGene00001224	ENSG00000085832	WBGene00001224
WBGene00001224	ENSG00000127527	WBGene00001224
WBGene00001225	ENSG00000106263	WBGene00001225
WBGene00001226	ENSG00000184110	WBGene00001226
WBGene00001227	ENSG00000100353	WBGene00001227
WBGene00001228	ENSG00000104408	WBGene00001228
WBGene00001229	ENSG00000175390	WBGene00001229
WBGene00001229	ENSG00000280606	WBGene00001229
WBGene00001230	ENSG00000130811	WBGene00001230
WBGene00001231	ENSG00000147677	WBGene00001231
WBGene00001232	ENSG00000084623	WBGene00001232
WBGene00001233	ENSG00000178982	WBGene00001233
WBGene00001233	ENSG00000282986	WBGene00001233
WBGene00001234	ENSG00000242372	WBGene00001234
WBGene00001235	ENSG00000103363	WBGene00001235
WBGene00001236	ENSG00000154582	WBGene00001236
WBGene00001241	ENSG00000119915	WBGene00001241
WBGene00001241	ENSG00000170522	WBGene00001241
WBGene00001248	ENSG00000066629	WBGene00001248
WBGene00001248	ENSG00000125746	WBGene00001248
WBGene00001248	ENSG00000143924	WBGene00001248
WBGene00001248	ENSG00000149499	WBGene00001248
WBGene00001249	ENSG00000102145	WBGene00001249
WBGene00001258	ENSG00000021776	WBGene00001258
WBGene00001259	ENSG00000109111	WBGene00001259
WBGene00001262	ENSG00000127948	WBGene00001262
WBGene00001263	ENSG00000169031	WBGene00001263
WBGene00001263	ENSG00000187498	WBGene00001263
WBGene00001263	ENSG00000188153	WBGene00001263
WBGene00001281	ENSG00000130177	WBGene00001281
WBGene00001303	ENSG00000132432	WBGene00001303
WBGene00001320	ENSG00000112759	WBGene00001320
WBGene00001320	ENSG00000174669	WBGene00001320
WBGene00001320	ENSG00000198246	WBGene00001320
WBGene00001324	ENSG00000085274	WBGene00001324
WBGene00001324	ENSG00000112365	WBGene00001324
WBGene00001328	ENSG00000130702	WBGene00001328
WBGene00001329	ENSG00000049283	WBGene00001329
WBGene00001329	ENSG00000063245	WBGene00001329
WBGene00001329	ENSG00000072134	WBGene00001329
WBGene00001330	ENSG00000131037	WBGene00001330
WBGene00001330	ENSG00000151491	WBGene00001330
WBGene00001330	ENSG00000177106	WBGene00001330
WBGene00001331	ENSG00000100196	WBGene00001331
WBGene00001331	ENSG00000105438	WBGene00001331
WBGene00001331	ENSG00000136240	WBGene00001331
WBGene00001333	ENSG00000092820	WBGene00001333
WBGene00001333	ENSG00000137710	WBGene00001333
WBGene00001333	ENSG00000147065	WBGene00001333
WBGene00001334	ENSG00000086619	WBGene00001334
WBGene00001334	ENSG00000197930	WBGene00001334
WBGene00001335	ENSG00000097033	WBGene00001335
WBGene00001335	ENSG00000148341	WBGene00001335
WBGene00001336	ENSG00000172053	WBGene00001336
WBGene00001337	ENSG00000136628	WBGene00001337
WBGene00001338	ENSG00000103356	WBGene00001338
WBGene00001340	ENSG00000048740	WBGene00001340
WBGene00001340	ENSG00000149187	WBGene00001340
WBGene00001352	ENSG00000083642	WBGene00001352
WBGene00001352	ENSG00000121892	WBGene00001352
WBGene00001358	ENSG00000213465	WBGene00001358
WBGene00001365	ENSG00000112782	WBGene00001365
WBGene00001365	ENSG00000155962	WBGene00001365
WBGene00001365	ENSG00000169504	WBGene00001365
WBGene00001365	ENSG00000169583	WBGene00001365
WBGene00001365	ENSG00000206394	WBGene00001365
WBGene00001365	ENSG00000213719	WBGene00001365
WBGene00001365	ENSG00000223639	WBGene00001365
WBGene00001365	ENSG00000226248	WBGene00001365
WBGene00001365	ENSG00000226417	WBGene00001365
WBGene00001365	ENSG00000226651	WBGene00001365
WBGene00001365	ENSG00000230685	WBGene00001365
WBGene00001366	ENSG00000102302	WBGene00001366
WBGene00001366	ENSG00000127084	WBGene00001366
WBGene00001366	ENSG00000139132	WBGene00001366
WBGene00001366	ENSG00000146192	WBGene00001366
WBGene00001368	ENSG00000066044	WBGene00001368
WBGene00001368	ENSG00000107105	WBGene00001368
WBGene00001368	ENSG00000162374	WBGene00001368
WBGene00001368	ENSG00000196361	WBGene00001368
WBGene00001371	ENSG00000112782	WBGene00001371
WBGene00001371	ENSG00000155962	WBGene00001371
WBGene00001371	ENSG00000169504	WBGene00001371
WBGene00001371	ENSG00000169583	WBGene00001371
WBGene00001371	ENSG00000206394	WBGene00001371
WBGene00001371	ENSG00000213719	WBGene00001371
WBGene00001371	ENSG00000223639	WBGene00001371
WBGene00001371	ENSG00000226248	WBGene00001371
WBGene00001371	ENSG00000226417	WBGene00001371
WBGene00001371	ENSG00000226651	WBGene00001371
WBGene00001371	ENSG00000230685	WBGene00001371
WBGene00001372	ENSG00000100823	WBGene00001372
WBGene00001374	ENSG00000156486	WBGene00001374
WBGene00001374	ENSG00000162975	WBGene00001374
WBGene00001377	ENSG00000064655	WBGene00001377
WBGene00001377	ENSG00000104313	WBGene00001377
WBGene00001377	ENSG00000112319	WBGene00001377
WBGene00001377	ENSG00000158161	WBGene00001377
WBGene00001395	ENSG00000134824	WBGene00001395
WBGene00001395	ENSG00000149485	WBGene00001395
WBGene00001395	ENSG00000221968	WBGene00001395
WBGene00001395		WBGene00001395
WBGene00001396	ENSG00000134824	WBGene00001396
WBGene00001396	ENSG00000149485	WBGene00001396
WBGene00001396	ENSG00000221968	WBGene00001396
WBGene00001396		WBGene00001396
WBGene00001397	ENSG00000099194	WBGene00001397
WBGene00001397	ENSG00000145284	WBGene00001397
WBGene00001398	ENSG00000099194	WBGene00001398
WBGene00001398	ENSG00000145284	WBGene00001398
WBGene00001399	ENSG00000099194	WBGene00001399
WBGene00001399	ENSG00000145284	WBGene00001399
WBGene00001403	ENSG00000077942	WBGene00001403
WBGene00001404	ENSG00000130957	WBGene00001404
WBGene00001404	ENSG00000165140	WBGene00001404
WBGene00001405	ENSG00000084073	WBGene00001405
WBGene00001406	ENSG00000173653	WBGene00001406
WBGene00001410	ENSG00000113108	WBGene00001410
WBGene00001410	ENSG00000163697	WBGene00001410
WBGene00001410	ENSG00000166313	WBGene00001410
WBGene00001411	ENSG00000141965	WBGene00001411
WBGene00001411	ENSG00000145780	WBGene00001411
WBGene00001411	ENSG00000169018	WBGene00001411
WBGene00001412	ENSG00000100034	WBGene00001412
WBGene00001412	ENSG00000175175	WBGene00001412
WBGene00001414	ENSG00000115155	WBGene00001414
WBGene00001414	ENSG00000135636	WBGene00001414
WBGene00001414	ENSG00000138119	WBGene00001414
WBGene00001414	ENSG00000214814	WBGene00001414
WBGene00001414	ENSG00000249715	WBGene00001414
WBGene00001414		WBGene00001414
WBGene00001425	ENSG00000214253	WBGene00001425
WBGene00001426	ENSG00000173486	WBGene00001426
WBGene00001427	ENSG00000088832	WBGene00001427
WBGene00001427	ENSG00000119782	WBGene00001427
WBGene00001427	ENSG00000198225	WBGene00001427
WBGene00001431	ENSG00000004478	WBGene00001431
WBGene00001431	ENSG00000096060	WBGene00001431
WBGene00001432	ENSG00000079150	WBGene00001432
WBGene00001432	ENSG00000106080	WBGene00001432
WBGene00001434	ENSG00000170608	WBGene00001434
WBGene00001434	ENSG00000176678	WBGene00001434
WBGene00001434	ENSG00000176692	WBGene00001434
WBGene00001434	ENSG00000178919	WBGene00001434
WBGene00001434	ENSG00000179772	WBGene00001434
WBGene00001434	ENSG00000183770	WBGene00001434
WBGene00001434	ENSG00000186564	WBGene00001434
WBGene00001434	ENSG00000186790	WBGene00001434
WBGene00001434	ENSG00000187140	WBGene00001434
WBGene00001434	ENSG00000251493	WBGene00001434
WBGene00001438	ENSG00000168269	WBGene00001438
WBGene00001438	ENSG00000186766	WBGene00001438
WBGene00001438	ENSG00000214336	WBGene00001438
WBGene00001443	ENSG00000177731	WBGene00001443
WBGene00001470	ENSG00000076108	WBGene00001470
WBGene00001470	ENSG00000123636	WBGene00001470
WBGene00001475	ENSG00000008300	WBGene00001475
WBGene00001475	ENSG00000075275	WBGene00001475
WBGene00001475	ENSG00000143126	WBGene00001475
WBGene00001476	ENSG00000007933	WBGene00001476
WBGene00001476	ENSG00000010932	WBGene00001476
WBGene00001476	ENSG00000076258	WBGene00001476
WBGene00001476	ENSG00000094963	WBGene00001476
WBGene00001476	ENSG00000117507	WBGene00001476
WBGene00001476	ENSG00000131781	WBGene00001476
WBGene00001477	ENSG00000007933	WBGene00001477
WBGene00001477	ENSG00000010932	WBGene00001477
WBGene00001477	ENSG00000076258	WBGene00001477
WBGene00001477	ENSG00000094963	WBGene00001477
WBGene00001477	ENSG00000117507	WBGene00001477
WBGene00001477	ENSG00000131781	WBGene00001477
WBGene00001478	ENSG00000007933	WBGene00001478
WBGene00001478	ENSG00000010932	WBGene00001478
WBGene00001478	ENSG00000076258	WBGene00001478
WBGene00001478	ENSG00000094963	WBGene00001478
WBGene00001478	ENSG00000117507	WBGene00001478
WBGene00001478	ENSG00000131781	WBGene00001478
WBGene00001480	ENSG00000007933	WBGene00001480
WBGene00001480	ENSG00000010932	WBGene00001480
WBGene00001480	ENSG00000076258	WBGene00001480
WBGene00001480	ENSG00000094963	WBGene00001480
WBGene00001480	ENSG00000117507	WBGene00001480
WBGene00001480	ENSG00000131781	WBGene00001480
WBGene00001483	ENSG00000141232	WBGene00001483
WBGene00001483	ENSG00000183864	WBGene00001483
WBGene00001485	ENSG00000188566	WBGene00001485
WBGene00001485	ENSG00000283590	WBGene00001485
WBGene00001489	ENSG00000095203	WBGene00001489
WBGene00001489	ENSG00000115109	WBGene00001489
WBGene00001490	ENSG00000006607	WBGene00001490
WBGene00001490	ENSG00000152767	WBGene00001490
WBGene00001492	ENSG00000163629	WBGene00001492
WBGene00001492	ENSG00000170324	WBGene00001492
WBGene00001496	ENSG00000126391	WBGene00001496
WBGene00001496		WBGene00001496
WBGene00001497	ENSG00000179115	WBGene00001497
WBGene00001498	ENSG00000116120	WBGene00001498
WBGene00001499	ENSG00000174013	WBGene00001499
WBGene00001500	ENSG00000132446	WBGene00001500
WBGene00001500	ENSG00000167996	WBGene00001500
WBGene00001500	ENSG00000181867	WBGene00001500
WBGene00001501	ENSG00000132446	WBGene00001501
WBGene00001501	ENSG00000167996	WBGene00001501
WBGene00001501	ENSG00000181867	WBGene00001501
WBGene00001502	ENSG00000164924	WBGene00001502
WBGene00001502	ENSG00000166913	WBGene00001502
WBGene00001503	ENSG00000091483	WBGene00001503
WBGene00001505	ENSG00000130383	WBGene00001505
WBGene00001505	ENSG00000156413	WBGene00001505
WBGene00001505	ENSG00000171124	WBGene00001505
WBGene00001505	ENSG00000172461	WBGene00001505
WBGene00001507	ENSG00000180549	WBGene00001507
WBGene00001507	ENSG00000196371	WBGene00001507
WBGene00001508	ENSG00000033170	WBGene00001508
WBGene00001509	ENSG00000116688	WBGene00001509
WBGene00001509	ENSG00000171109	WBGene00001509
WBGene00001510	ENSG00000105325	WBGene00001510
WBGene00001512	ENSG00000145864	WBGene00001512
WBGene00001512	ENSG00000163288	WBGene00001512
WBGene00001512	ENSG00000166206	WBGene00001512
WBGene00001512	ENSG00000268089	WBGene00001512
WBGene00001515	ENSG00000105808	WBGene00001515
WBGene00001515	ENSG00000111344	WBGene00001515
WBGene00001515	ENSG00000155903	WBGene00001515
WBGene00001515	ENSG00000170667	WBGene00001515
WBGene00001515	ENSG00000185989	WBGene00001515
WBGene00001515	ENSG00000280477	WBGene00001515
WBGene00001516	ENSG00000075391	WBGene00001516
WBGene00001516	ENSG00000136848	WBGene00001516
WBGene00001516	ENSG00000197283	WBGene00001516
WBGene00001516	ENSG00000227460	WBGene00001516
WBGene00001519	ENSG00000133019	WBGene00001519
WBGene00001519	ENSG00000168539	WBGene00001519
WBGene00001519	ENSG00000180720	WBGene00001519
WBGene00001519	ENSG00000181072	WBGene00001519
WBGene00001519	ENSG00000184984	WBGene00001519
WBGene00001520	ENSG00000158864	WBGene00001520
WBGene00001522	ENSG00000129151	WBGene00001522
WBGene00001523	ENSG00000185973	WBGene00001523
WBGene00001526	ENSG00000102572	WBGene00001526
WBGene00001526	ENSG00000115694	WBGene00001526
WBGene00001526	ENSG00000134602	WBGene00001526
WBGene00001527	ENSG00000001084	WBGene00001527
WBGene00001552		WBGene00001552
WBGene00001554		WBGene00001554
WBGene00001555		WBGene00001555
WBGene00001556		WBGene00001556
WBGene00001557		WBGene00001557
WBGene00001558	ENSG00000057608	WBGene00001558
WBGene00001558	ENSG00000203879	WBGene00001558
WBGene00001559	ENSG00000130052	WBGene00001559
WBGene00001559	ENSG00000133121	WBGene00001559
WBGene00001559	ENSG00000164741	WBGene00001559
WBGene00001577	ENSG00000085719	WBGene00001577
WBGene00001577	ENSG00000124772	WBGene00001577
WBGene00001577	ENSG00000139117	WBGene00001577
WBGene00001577	ENSG00000140848	WBGene00001577
WBGene00001577	ENSG00000144550	WBGene00001577
WBGene00001577	ENSG00000196353	WBGene00001577
WBGene00001577	ENSG00000214078	WBGene00001577
WBGene00001579	ENSG00000055163	WBGene00001579
WBGene00001579	ENSG00000273749	WBGene00001579
WBGene00001580	ENSG00000061676	WBGene00001580
WBGene00001580	ENSG00000123338	WBGene00001580
WBGene00001582	ENSG00000101445	WBGene00001582
WBGene00001582	ENSG00000160972	WBGene00001582
WBGene00001583	ENSG00000089053	WBGene00001583
WBGene00001585	ENSG00000127337	WBGene00001585
WBGene00001590	ENSG00000144182	WBGene00001590
WBGene00001604	ENSG00000135821	WBGene00001604
WBGene00001612	ENSG00000120251	WBGene00001612
WBGene00001612	ENSG00000125675	WBGene00001612
WBGene00001612	ENSG00000152578	WBGene00001612
WBGene00001612	ENSG00000155511	WBGene00001612
WBGene00001612	ENSG00000163873	WBGene00001612
WBGene00001612	ENSG00000164418	WBGene00001612
WBGene00001612	ENSG00000171189	WBGene00001612
WBGene00001613	ENSG00000120251	WBGene00001613
WBGene00001613	ENSG00000125675	WBGene00001613
WBGene00001613	ENSG00000152578	WBGene00001613
WBGene00001613	ENSG00000155511	WBGene00001613
WBGene00001613	ENSG00000163873	WBGene00001613
WBGene00001613	ENSG00000164418	WBGene00001613
WBGene00001613	ENSG00000171189	WBGene00001613
WBGene00001620	ENSG00000110436	WBGene00001620
WBGene00001626	ENSG00000111846	WBGene00001626
WBGene00001626	ENSG00000124091	WBGene00001626
WBGene00001626	ENSG00000140297	WBGene00001626
WBGene00001626	ENSG00000176928	WBGene00001626
WBGene00001626	ENSG00000187210	WBGene00001626
WBGene00001626	ENSG00000205318	WBGene00001626
WBGene00001627	ENSG00000152127	WBGene00001627
WBGene00001627	ENSG00000167889	WBGene00001627
WBGene00001628	ENSG00000141429	WBGene00001628
WBGene00001628	ENSG00000144278	WBGene00001628
WBGene00001629	ENSG00000100626	WBGene00001629
WBGene00001629	ENSG00000143641	WBGene00001629
WBGene00001632	ENSG00000109586	WBGene00001632
WBGene00001635	ENSG00000164574	WBGene00001635
WBGene00001635	ENSG00000174473	WBGene00001635
WBGene00001636	ENSG00000178234	WBGene00001636
WBGene00001638	ENSG00000131446	WBGene00001638
WBGene00001639	ENSG00000131446	WBGene00001639
WBGene00001640	ENSG00000111846	WBGene00001640
WBGene00001640	ENSG00000124091	WBGene00001640
WBGene00001640	ENSG00000140297	WBGene00001640
WBGene00001640	ENSG00000176928	WBGene00001640
WBGene00001640	ENSG00000187210	WBGene00001640
WBGene00001640	ENSG00000205318	WBGene00001640
WBGene00001641	ENSG00000111846	WBGene00001641
WBGene00001641	ENSG00000124091	WBGene00001641
WBGene00001641	ENSG00000140297	WBGene00001641
WBGene00001641	ENSG00000176928	WBGene00001641
WBGene00001641	ENSG00000187210	WBGene00001641
WBGene00001641	ENSG00000205318	WBGene00001641
WBGene00001642	ENSG00000111846	WBGene00001642
WBGene00001642	ENSG00000124091	WBGene00001642
WBGene00001642	ENSG00000140297	WBGene00001642
WBGene00001642	ENSG00000176928	WBGene00001642
WBGene00001642	ENSG00000187210	WBGene00001642
WBGene00001642	ENSG00000205318	WBGene00001642
WBGene00001643	ENSG00000111846	WBGene00001643
WBGene00001643	ENSG00000124091	WBGene00001643
WBGene00001643	ENSG00000140297	WBGene00001643
WBGene00001643	ENSG00000176928	WBGene00001643
WBGene00001643	ENSG00000187210	WBGene00001643
WBGene00001643	ENSG00000205318	WBGene00001643
WBGene00001644	ENSG00000111846	WBGene00001644
WBGene00001644	ENSG00000124091	WBGene00001644
WBGene00001644	ENSG00000140297	WBGene00001644
WBGene00001644	ENSG00000176928	WBGene00001644
WBGene00001644	ENSG00000187210	WBGene00001644
WBGene00001644	ENSG00000205318	WBGene00001644
WBGene00001645	ENSG00000168282	WBGene00001645
WBGene00001646	ENSG00000100522	WBGene00001646
WBGene00001648	ENSG00000087258	WBGene00001648
WBGene00001650	ENSG00000163638	WBGene00001650
WBGene00001650	ENSG00000173157	WBGene00001650
WBGene00001651	ENSG00000083067	WBGene00001651
WBGene00001651	ENSG00000092439	WBGene00001651
WBGene00001651	ENSG00000119121	WBGene00001651
WBGene00001651	ENSG00000134160	WBGene00001651
WBGene00001660	ENSG00000038532	WBGene00001660
WBGene00001661	ENSG00000198522	WBGene00001661
WBGene00001662	ENSG00000100347	WBGene00001662
WBGene00001674	ENSG00000120063	WBGene00001674
WBGene00001674	ENSG00000146535	WBGene00001674
WBGene00001679	ENSG00000078369	WBGene00001679
WBGene00001679	ENSG00000114450	WBGene00001679
WBGene00001679	ENSG00000172354	WBGene00001679
WBGene00001680	ENSG00000069966	WBGene00001680
WBGene00001681	ENSG00000127920	WBGene00001681
WBGene00001681	ENSG00000162188	WBGene00001681
WBGene00001681	ENSG00000167414	WBGene00001681
WBGene00001681	ENSG00000168243	WBGene00001681
WBGene00001681	ENSG00000172380	WBGene00001681
WBGene00001681	ENSG00000174021	WBGene00001681
WBGene00001681	ENSG00000176533	WBGene00001681
WBGene00001681	ENSG00000186469	WBGene00001681
WBGene00001681	ENSG00000242616	WBGene00001681
WBGene00001681	ENSG00000282972	WBGene00001681
WBGene00001682	ENSG00000127588	WBGene00001682
WBGene00001683	ENSG00000111640	WBGene00001683
WBGene00001684	ENSG00000111640	WBGene00001684
WBGene00001685	ENSG00000111640	WBGene00001685
WBGene00001686	ENSG00000111640	WBGene00001686
WBGene00001687	ENSG00000063660	WBGene00001687
WBGene00001687	ENSG00000076716	WBGene00001687
WBGene00001687	ENSG00000179399	WBGene00001687
WBGene00001687	ENSG00000183098	WBGene00001687
WBGene00001687	ENSG00000213420	WBGene00001687
WBGene00001707	ENSG00000083307	WBGene00001707
WBGene00001707	ENSG00000134317	WBGene00001707
WBGene00001707	ENSG00000158055	WBGene00001707
WBGene00001708	ENSG00000125388	WBGene00001708
WBGene00001708	ENSG00000198055	WBGene00001708
WBGene00001708	ENSG00000198873	WBGene00001708
WBGene00001709	ENSG00000100077	WBGene00001709
WBGene00001709	ENSG00000173020	WBGene00001709
WBGene00001740	ENSG00000043514	WBGene00001740
WBGene00001743	ENSG00000008256	WBGene00001743
WBGene00001743	ENSG00000100055	WBGene00001743
WBGene00001743	ENSG00000105443	WBGene00001743
WBGene00001743	ENSG00000108669	WBGene00001743
WBGene00001744	ENSG00000106105	WBGene00001744
WBGene00001745	ENSG00000141404	WBGene00001745
WBGene00001746	ENSG00000082701	WBGene00001746
WBGene00001746	ENSG00000105723	WBGene00001746
WBGene00001747	ENSG00000213639	WBGene00001747
WBGene00001748	ENSG00000172531	WBGene00001748
WBGene00001749	ENSG00000084207	WBGene00001749
WBGene00001758	ENSG00000084207	WBGene00001758
WBGene00001759	ENSG00000163106	WBGene00001759
WBGene00001771	ENSG00000084207	WBGene00001771
WBGene00001773	ENSG00000084207	WBGene00001773
WBGene00001790	ENSG00000100577	WBGene00001790
WBGene00001791	ENSG00000100577	WBGene00001791
WBGene00001792	ENSG00000065621	WBGene00001792
WBGene00001792	ENSG00000148834	WBGene00001792
WBGene00001793	ENSG00000104812	WBGene00001793
WBGene00001793	ENSG00000111713	WBGene00001793
WBGene00001794	ENSG00000183044	WBGene00001794
WBGene00001808	ENSG00000172850	WBGene00001808
WBGene00001808	ENSG00000204392	WBGene00001808
WBGene00001808	ENSG00000224979	WBGene00001808
WBGene00001808	ENSG00000225998	WBGene00001808
WBGene00001808	ENSG00000231502	WBGene00001808
WBGene00001808	ENSG00000236826	WBGene00001808
WBGene00001811	ENSG00000135776	WBGene00001811
WBGene00001813	ENSG00000135776	WBGene00001813
WBGene00001814	ENSG00000150967	WBGene00001814
WBGene00001815	ENSG00000115657	WBGene00001815
WBGene00001816	ENSG00000197150	WBGene00001816
WBGene00001819	ENSG00000150967	WBGene00001819
WBGene00001823	ENSG00000125877	WBGene00001823
WBGene00001824	ENSG00000168813	WBGene00001824
WBGene00001827	ENSG00000111727	WBGene00001827
WBGene00001829	ENSG00000164304	WBGene00001829
WBGene00001830	ENSG00000164304	WBGene00001830
WBGene00001834	ENSG00000116478	WBGene00001834
WBGene00001834	ENSG00000196591	WBGene00001834
WBGene00001837	ENSG00000048052	WBGene00001837
WBGene00001837	ENSG00000061273	WBGene00001837
WBGene00001837	ENSG00000068024	WBGene00001837
WBGene00001837	ENSG00000108840	WBGene00001837
WBGene00001840	ENSG00000123136	WBGene00001840
WBGene00001840	ENSG00000198563	WBGene00001840
WBGene00001840	ENSG00000215425	WBGene00001840
WBGene00001840	ENSG00000225073	WBGene00001840
WBGene00001840	ENSG00000225859	WBGene00001840
WBGene00001840	ENSG00000229496	WBGene00001840
WBGene00001840	ENSG00000230624	WBGene00001840
WBGene00001840	ENSG00000235439	WBGene00001840
WBGene00001843	ENSG00000113924	WBGene00001843
WBGene00001844	ENSG00000167861	WBGene00001844
WBGene00001853	ENSG00000124575	WBGene00001853
WBGene00001853	ENSG00000124610	WBGene00001853
WBGene00001853	ENSG00000168298	WBGene00001853
WBGene00001853	ENSG00000184357	WBGene00001853
WBGene00001853	ENSG00000187475	WBGene00001853
WBGene00001853	ENSG00000187837	WBGene00001853
WBGene00001854	ENSG00000124575	WBGene00001854
WBGene00001854	ENSG00000124610	WBGene00001854
WBGene00001854	ENSG00000168298	WBGene00001854
WBGene00001854	ENSG00000184357	WBGene00001854
WBGene00001854	ENSG00000187475	WBGene00001854
WBGene00001854	ENSG00000187837	WBGene00001854
WBGene00001855	ENSG00000124575	WBGene00001855
WBGene00001855	ENSG00000124610	WBGene00001855
WBGene00001855	ENSG00000168298	WBGene00001855
WBGene00001855	ENSG00000184357	WBGene00001855
WBGene00001855	ENSG00000187475	WBGene00001855
WBGene00001855	ENSG00000187837	WBGene00001855
WBGene00001856	ENSG00000124575	WBGene00001856
WBGene00001856	ENSG00000124610	WBGene00001856
WBGene00001856	ENSG00000168298	WBGene00001856
WBGene00001856	ENSG00000184357	WBGene00001856
WBGene00001856	ENSG00000187475	WBGene00001856
WBGene00001856	ENSG00000187837	WBGene00001856
WBGene00001857	ENSG00000124575	WBGene00001857
WBGene00001857	ENSG00000124610	WBGene00001857
WBGene00001857	ENSG00000168298	WBGene00001857
WBGene00001857	ENSG00000184357	WBGene00001857
WBGene00001857	ENSG00000187475	WBGene00001857
WBGene00001857	ENSG00000187837	WBGene00001857
WBGene00001860	ENSG00000072501	WBGene00001860
WBGene00001860	ENSG00000077935	WBGene00001860
WBGene00001862	ENSG00000143452	WBGene00001862
WBGene00001862	ENSG00000176635	WBGene00001862
WBGene00001863	ENSG00000143341	WBGene00001863
WBGene00001863	ENSG00000148357	WBGene00001863
WBGene00001872	ENSG00000057468	WBGene00001872
WBGene00001875	ENSG00000158406	WBGene00001875
WBGene00001875	ENSG00000197061	WBGene00001875
WBGene00001875	ENSG00000197238	WBGene00001875
WBGene00001875	ENSG00000197837	WBGene00001875
WBGene00001875	ENSG00000270276	WBGene00001875
WBGene00001875	ENSG00000270882	WBGene00001875
WBGene00001875	ENSG00000273542	WBGene00001875
WBGene00001875	ENSG00000274618	WBGene00001875
WBGene00001875	ENSG00000275126	WBGene00001875
WBGene00001875	ENSG00000276180	WBGene00001875
WBGene00001875	ENSG00000276966	WBGene00001875
WBGene00001875	ENSG00000277157	WBGene00001875
WBGene00001875	ENSG00000278637	WBGene00001875
WBGene00001875	ENSG00000278705	WBGene00001875
WBGene00001876	ENSG00000183598	WBGene00001876
WBGene00001876	ENSG00000197153	WBGene00001876
WBGene00001876	ENSG00000197409	WBGene00001876
WBGene00001876	ENSG00000203811	WBGene00001876
WBGene00001876	ENSG00000203852	WBGene00001876
WBGene00001876	ENSG00000273983	WBGene00001876
WBGene00001876	ENSG00000274267	WBGene00001876
WBGene00001876	ENSG00000274750	WBGene00001876
WBGene00001876	ENSG00000275379	WBGene00001876
WBGene00001876	ENSG00000275714	WBGene00001876
WBGene00001876	ENSG00000277775	WBGene00001876
WBGene00001876	ENSG00000278272	WBGene00001876
WBGene00001876	ENSG00000278828	WBGene00001876
WBGene00001877	ENSG00000164508	WBGene00001877
WBGene00001877	ENSG00000180573	WBGene00001877
WBGene00001877	ENSG00000181218	WBGene00001877
WBGene00001877	ENSG00000184260	WBGene00001877
WBGene00001877	ENSG00000184270	WBGene00001877
WBGene00001877	ENSG00000188486	WBGene00001877
WBGene00001877	ENSG00000196747	WBGene00001877
WBGene00001877	ENSG00000196787	WBGene00001877
WBGene00001877	ENSG00000196866	WBGene00001877
WBGene00001877	ENSG00000203812	WBGene00001877
WBGene00001877	ENSG00000246705	WBGene00001877
WBGene00001877	ENSG00000272196	WBGene00001877
WBGene00001877	ENSG00000274997	WBGene00001877
WBGene00001877	ENSG00000275221	WBGene00001877
WBGene00001877	ENSG00000276368	WBGene00001877
WBGene00001877	ENSG00000276903	WBGene00001877
WBGene00001877	ENSG00000277075	WBGene00001877
WBGene00001877	ENSG00000278463	WBGene00001877
WBGene00001877	ENSG00000278677	WBGene00001877
WBGene00001878	ENSG00000124635	WBGene00001878
WBGene00001878	ENSG00000146047	WBGene00001878
WBGene00001878	ENSG00000158373	WBGene00001878
WBGene00001878	ENSG00000180596	WBGene00001878
WBGene00001878	ENSG00000184678	WBGene00001878
WBGene00001878	ENSG00000185130	WBGene00001878
WBGene00001878	ENSG00000196890	WBGene00001878
WBGene00001878	ENSG00000197903	WBGene00001878
WBGene00001878	ENSG00000203814	WBGene00001878
WBGene00001878	ENSG00000233822	WBGene00001878
WBGene00001878	ENSG00000234289	WBGene00001878
WBGene00001878	ENSG00000273703	WBGene00001878
WBGene00001878	ENSG00000273802	WBGene00001878
WBGene00001878	ENSG00000274290	WBGene00001878
WBGene00001878	ENSG00000274641	WBGene00001878
WBGene00001878	ENSG00000275713	WBGene00001878
WBGene00001878	ENSG00000276410	WBGene00001878
WBGene00001878	ENSG00000277224	WBGene00001878
WBGene00001878	ENSG00000278588	WBGene00001878
WBGene00001879	ENSG00000158406	WBGene00001879
WBGene00001879	ENSG00000197061	WBGene00001879
WBGene00001879	ENSG00000197238	WBGene00001879
WBGene00001879	ENSG00000197837	WBGene00001879
WBGene00001879	ENSG00000270276	WBGene00001879
WBGene00001879	ENSG00000270882	WBGene00001879
WBGene00001879	ENSG00000273542	WBGene00001879
WBGene00001879	ENSG00000274618	WBGene00001879
WBGene00001879	ENSG00000275126	WBGene00001879
WBGene00001879	ENSG00000276180	WBGene00001879
WBGene00001879	ENSG00000276966	WBGene00001879
WBGene00001879	ENSG00000277157	WBGene00001879
WBGene00001879	ENSG00000278637	WBGene00001879
WBGene00001879	ENSG00000278705	WBGene00001879
WBGene00001880	ENSG00000183598	WBGene00001880
WBGene00001880	ENSG00000197153	WBGene00001880
WBGene00001880	ENSG00000197409	WBGene00001880
WBGene00001880	ENSG00000203811	WBGene00001880
WBGene00001880	ENSG00000203852	WBGene00001880
WBGene00001880	ENSG00000273983	WBGene00001880
WBGene00001880	ENSG00000274267	WBGene00001880
WBGene00001880	ENSG00000274750	WBGene00001880
WBGene00001880	ENSG00000275379	WBGene00001880
WBGene00001880	ENSG00000275714	WBGene00001880
WBGene00001880	ENSG00000277775	WBGene00001880
WBGene00001880	ENSG00000278272	WBGene00001880
WBGene00001880	ENSG00000278828	WBGene00001880
WBGene00001881	ENSG00000164508	WBGene00001881
WBGene00001881	ENSG00000180573	WBGene00001881
WBGene00001881	ENSG00000181218	WBGene00001881
WBGene00001881	ENSG00000184260	WBGene00001881
WBGene00001881	ENSG00000184270	WBGene00001881
WBGene00001881	ENSG00000188486	WBGene00001881
WBGene00001881	ENSG00000196747	WBGene00001881
WBGene00001881	ENSG00000196787	WBGene00001881
WBGene00001881	ENSG00000196866	WBGene00001881
WBGene00001881	ENSG00000203812	WBGene00001881
WBGene00001881	ENSG00000246705	WBGene00001881
WBGene00001881	ENSG00000272196	WBGene00001881
WBGene00001881	ENSG00000274997	WBGene00001881
WBGene00001881	ENSG00000275221	WBGene00001881
WBGene00001881	ENSG00000276368	WBGene00001881
WBGene00001881	ENSG00000276903	WBGene00001881
WBGene00001881	ENSG00000277075	WBGene00001881
WBGene00001881	ENSG00000278463	WBGene00001881
WBGene00001881	ENSG00000278677	WBGene00001881
WBGene00001882	ENSG00000124635	WBGene00001882
WBGene00001882	ENSG00000146047	WBGene00001882
WBGene00001882	ENSG00000158373	WBGene00001882
WBGene00001882	ENSG00000180596	WBGene00001882
WBGene00001882	ENSG00000184678	WBGene00001882
WBGene00001882	ENSG00000185130	WBGene00001882
WBGene00001882	ENSG00000196890	WBGene00001882
WBGene00001882	ENSG00000197903	WBGene00001882
WBGene00001882	ENSG00000203814	WBGene00001882
WBGene00001882	ENSG00000233822	WBGene00001882
WBGene00001882	ENSG00000234289	WBGene00001882
WBGene00001882	ENSG00000273703	WBGene00001882
WBGene00001882	ENSG00000273802	WBGene00001882
WBGene00001882	ENSG00000274290	WBGene00001882
WBGene00001882	ENSG00000274641	WBGene00001882
WBGene00001882	ENSG00000275713	WBGene00001882
WBGene00001882	ENSG00000276410	WBGene00001882
WBGene00001882	ENSG00000277224	WBGene00001882
WBGene00001882	ENSG00000278588	WBGene00001882
WBGene00001883	ENSG00000183598	WBGene00001883
WBGene00001883	ENSG00000197153	WBGene00001883
WBGene00001883	ENSG00000197409	WBGene00001883
WBGene00001883	ENSG00000203811	WBGene00001883
WBGene00001883	ENSG00000203852	WBGene00001883
WBGene00001883	ENSG00000273983	WBGene00001883
WBGene00001883	ENSG00000274267	WBGene00001883
WBGene00001883	ENSG00000274750	WBGene00001883
WBGene00001883	ENSG00000275379	WBGene00001883
WBGene00001883	ENSG00000275714	WBGene00001883
WBGene00001883	ENSG00000277775	WBGene00001883
WBGene00001883	ENSG00000278272	WBGene00001883
WBGene00001883	ENSG00000278828	WBGene00001883
WBGene00001884	ENSG00000158406	WBGene00001884
WBGene00001884	ENSG00000197061	WBGene00001884
WBGene00001884	ENSG00000197238	WBGene00001884
WBGene00001884	ENSG00000197837	WBGene00001884
WBGene00001884	ENSG00000270276	WBGene00001884
WBGene00001884	ENSG00000270882	WBGene00001884
WBGene00001884	ENSG00000273542	WBGene00001884
WBGene00001884	ENSG00000274618	WBGene00001884
WBGene00001884	ENSG00000275126	WBGene00001884
WBGene00001884	ENSG00000276180	WBGene00001884
WBGene00001884	ENSG00000276966	WBGene00001884
WBGene00001884	ENSG00000277157	WBGene00001884
WBGene00001884	ENSG00000278637	WBGene00001884
WBGene00001884	ENSG00000278705	WBGene00001884
WBGene00001885	ENSG00000124635	WBGene00001885
WBGene00001885	ENSG00000146047	WBGene00001885
WBGene00001885	ENSG00000158373	WBGene00001885
WBGene00001885	ENSG00000180596	WBGene00001885
WBGene00001885	ENSG00000184678	WBGene00001885
WBGene00001885	ENSG00000185130	WBGene00001885
WBGene00001885	ENSG00000196890	WBGene00001885
WBGene00001885	ENSG00000197903	WBGene00001885
WBGene00001885	ENSG00000203814	WBGene00001885
WBGene00001885	ENSG00000233822	WBGene00001885
WBGene00001885	ENSG00000234289	WBGene00001885
WBGene00001885	ENSG00000273703	WBGene00001885
WBGene00001885	ENSG00000273802	WBGene00001885
WBGene00001885	ENSG00000274290	WBGene00001885
WBGene00001885	ENSG00000274641	WBGene00001885
WBGene00001885	ENSG00000275713	WBGene00001885
WBGene00001885	ENSG00000276410	WBGene00001885
WBGene00001885	ENSG00000277224	WBGene00001885
WBGene00001885	ENSG00000278588	WBGene00001885
WBGene00001886	ENSG00000164508	WBGene00001886
WBGene00001886	ENSG00000180573	WBGene00001886
WBGene00001886	ENSG00000181218	WBGene00001886
WBGene00001886	ENSG00000184260	WBGene00001886
WBGene00001886	ENSG00000184270	WBGene00001886
WBGene00001886	ENSG00000188486	WBGene00001886
WBGene00001886	ENSG00000196747	WBGene00001886
WBGene00001886	ENSG00000196787	WBGene00001886
WBGene00001886	ENSG00000196866	WBGene00001886
WBGene00001886	ENSG00000203812	WBGene00001886
WBGene00001886	ENSG00000246705	WBGene00001886
WBGene00001886	ENSG00000272196	WBGene00001886
WBGene00001886	ENSG00000274997	WBGene00001886
WBGene00001886	ENSG00000275221	WBGene00001886
WBGene00001886	ENSG00000276368	WBGene00001886
WBGene00001886	ENSG00000276903	WBGene00001886
WBGene00001886	ENSG00000277075	WBGene00001886
WBGene00001886	ENSG00000278463	WBGene00001886
WBGene00001886	ENSG00000278677	WBGene00001886
WBGene00001887	ENSG00000183598	WBGene00001887
WBGene00001887	ENSG00000197153	WBGene00001887
WBGene00001887	ENSG00000197409	WBGene00001887
WBGene00001887	ENSG00000203811	WBGene00001887
WBGene00001887	ENSG00000203852	WBGene00001887
WBGene00001887	ENSG00000273983	WBGene00001887
WBGene00001887	ENSG00000274267	WBGene00001887
WBGene00001887	ENSG00000274750	WBGene00001887
WBGene00001887	ENSG00000275379	WBGene00001887
WBGene00001887	ENSG00000275714	WBGene00001887
WBGene00001887	ENSG00000277775	WBGene00001887
WBGene00001887	ENSG00000278272	WBGene00001887
WBGene00001887	ENSG00000278828	WBGene00001887
WBGene00001888	ENSG00000158406	WBGene00001888
WBGene00001888	ENSG00000197061	WBGene00001888
WBGene00001888	ENSG00000197238	WBGene00001888
WBGene00001888	ENSG00000197837	WBGene00001888
WBGene00001888	ENSG00000270276	WBGene00001888
WBGene00001888	ENSG00000270882	WBGene00001888
WBGene00001888	ENSG00000273542	WBGene00001888
WBGene00001888	ENSG00000274618	WBGene00001888
WBGene00001888	ENSG00000275126	WBGene00001888
WBGene00001888	ENSG00000276180	WBGene00001888
WBGene00001888	ENSG00000276966	WBGene00001888
WBGene00001888	ENSG00000277157	WBGene00001888
WBGene00001888	ENSG00000278637	WBGene00001888
WBGene00001888	ENSG00000278705	WBGene00001888
WBGene00001889	ENSG00000124635	WBGene00001889
WBGene00001889	ENSG00000146047	WBGene00001889
WBGene00001889	ENSG00000158373	WBGene00001889
WBGene00001889	ENSG00000180596	WBGene00001889
WBGene00001889	ENSG00000184678	WBGene00001889
WBGene00001889	ENSG00000185130	WBGene00001889
WBGene00001889	ENSG00000196890	WBGene00001889
WBGene00001889	ENSG00000197903	WBGene00001889
WBGene00001889	ENSG00000203814	WBGene00001889
WBGene00001889	ENSG00000233822	WBGene00001889
WBGene00001889	ENSG00000234289	WBGene00001889
WBGene00001889	ENSG00000273703	WBGene00001889
WBGene00001889	ENSG00000273802	WBGene00001889
WBGene00001889	ENSG00000274290	WBGene00001889
WBGene00001889	ENSG00000274641	WBGene00001889
WBGene00001889	ENSG00000275713	WBGene00001889
WBGene00001889	ENSG00000276410	WBGene00001889
WBGene00001889	ENSG00000277224	WBGene00001889
WBGene00001889	ENSG00000278588	WBGene00001889
WBGene00001890	ENSG00000164508	WBGene00001890
WBGene00001890	ENSG00000180573	WBGene00001890
WBGene00001890	ENSG00000181218	WBGene00001890
WBGene00001890	ENSG00000184260	WBGene00001890
WBGene00001890	ENSG00000184270	WBGene00001890
WBGene00001890	ENSG00000188486	WBGene00001890
WBGene00001890	ENSG00000196747	WBGene00001890
WBGene00001890	ENSG00000196787	WBGene00001890
WBGene00001890	ENSG00000196866	WBGene00001890
WBGene00001890	ENSG00000203812	WBGene00001890
WBGene00001890	ENSG00000246705	WBGene00001890
WBGene00001890	ENSG00000272196	WBGene00001890
WBGene00001890	ENSG00000274997	WBGene00001890
WBGene00001890	ENSG00000275221	WBGene00001890
WBGene00001890	ENSG00000276368	WBGene00001890
WBGene00001890	ENSG00000276903	WBGene00001890
WBGene00001890	ENSG00000277075	WBGene00001890
WBGene00001890	ENSG00000278463	WBGene00001890
WBGene00001890	ENSG00000278677	WBGene00001890
WBGene00001891	ENSG00000183598	WBGene00001891
WBGene00001891	ENSG00000197153	WBGene00001891
WBGene00001891	ENSG00000197409	WBGene00001891
WBGene00001891	ENSG00000203811	WBGene00001891
WBGene00001891	ENSG00000203852	WBGene00001891
WBGene00001891	ENSG00000273983	WBGene00001891
WBGene00001891	ENSG00000274267	WBGene00001891
WBGene00001891	ENSG00000274750	WBGene00001891
WBGene00001891	ENSG00000275379	WBGene00001891
WBGene00001891	ENSG00000275714	WBGene00001891
WBGene00001891	ENSG00000277775	WBGene00001891
WBGene00001891	ENSG00000278272	WBGene00001891
WBGene00001891	ENSG00000278828	WBGene00001891
WBGene00001892	ENSG00000158406	WBGene00001892
WBGene00001892	ENSG00000197061	WBGene00001892
WBGene00001892	ENSG00000197238	WBGene00001892
WBGene00001892	ENSG00000197837	WBGene00001892
WBGene00001892	ENSG00000270276	WBGene00001892
WBGene00001892	ENSG00000270882	WBGene00001892
WBGene00001892	ENSG00000273542	WBGene00001892
WBGene00001892	ENSG00000274618	WBGene00001892
WBGene00001892	ENSG00000275126	WBGene00001892
WBGene00001892	ENSG00000276180	WBGene00001892
WBGene00001892	ENSG00000276966	WBGene00001892
WBGene00001892	ENSG00000277157	WBGene00001892
[truncated: 13,255 more rows]

## Sheet: OMA
CE_WB_CURRENT	HS_ENSG	CE_WB_OLD	CE_WB_COMMENT
WBGene00000003	ENSG00000155465	WBGene00000003
WBGene00000022	ENSG00000167972	WBGene00000022
WBGene00000023	ENSG00000154263	WBGene00000023
WBGene00000024	ENSG00000188155	WBGene00000024
WBGene00000024	ENSG00000215454	WBGene00000024
WBGene00000024	ENSG00000221837	WBGene00000024
WBGene00000024	ENSG00000241123	WBGene00000024
WBGene00000024	ENSG00000243489	WBGene00000024
WBGene00000026	ENSG00000221859	WBGene00000026
WBGene00000028	ENSG00000188155	WBGene00000028
WBGene00000028	ENSG00000215454	WBGene00000028
WBGene00000028	ENSG00000221837	WBGene00000028
WBGene00000028	ENSG00000241123	WBGene00000028
WBGene00000028	ENSG00000243489	WBGene00000028
WBGene00000029	ENSG00000240542	WBGene00000029
WBGene00000033	ENSG00000272804	WBGene00000033
WBGene00000036	ENSG00000114200	WBGene00000036
WBGene00000039	ENSG00000130234	WBGene00000039
WBGene00000039	ENSG00000264813	WBGene00000039
WBGene00000040	ENSG00000122729	WBGene00000040
WBGene00000041	ENSG00000100412	WBGene00000041
WBGene00000058	ENSG00000166664	WBGene00000058
WBGene00000060	ENSG00000129749	WBGene00000060
WBGene00000060	ENSG00000174343	WBGene00000060
WBGene00000064	ENSG00000075624	WBGene00000064
WBGene00000064	ENSG00000184009	WBGene00000064
WBGene00000066	ENSG00000075624	WBGene00000066
WBGene00000066	ENSG00000184009	WBGene00000066
WBGene00000068	ENSG00000162104	WBGene00000068
WBGene00000069	ENSG00000078295	WBGene00000069
WBGene00000069	ENSG00000129467	WBGene00000069
WBGene00000071	ENSG00000173175	WBGene00000071
WBGene00000071	ENSG00000174233	WBGene00000071
WBGene00000072	ENSG00000087274	WBGene00000072
WBGene00000074	ENSG00000168615	WBGene00000074
WBGene00000080	ENSG00000197381	WBGene00000080
WBGene00000081	ENSG00000018510	WBGene00000081
WBGene00000082	ENSG00000049192	WBGene00000082
WBGene00000082	ENSG00000140470	WBGene00000082
WBGene00000082	ENSG00000140873	WBGene00000082
WBGene00000082	ENSG00000145536	WBGene00000082
WBGene00000083	ENSG00000049192	WBGene00000083
WBGene00000083	ENSG00000140470	WBGene00000083
WBGene00000083	ENSG00000140873	WBGene00000083
WBGene00000083	ENSG00000145536	WBGene00000083
WBGene00000086	ENSG00000110514	WBGene00000086
WBGene00000089	ENSG00000041353	WBGene00000089
WBGene00000089	ENSG00000069974	WBGene00000089
WBGene00000090	ENSG00000121879	WBGene00000090
WBGene00000092	ENSG00000121957	WBGene00000092
WBGene00000092	ENSG00000160360	WBGene00000092
WBGene00000096	ENSG00000130751	WBGene00000096
WBGene00000097	ENSG00000178381	WBGene00000097
WBGene00000099	ENSG00000087586	WBGene00000099
WBGene00000099	ENSG00000105146	WBGene00000099
WBGene00000099	ENSG00000178999	WBGene00000099
WBGene00000102	ENSG00000105221	WBGene00000102
WBGene00000102	ENSG00000275199	WBGene00000102
WBGene00000103	ENSG00000105221	WBGene00000103
WBGene00000103	ENSG00000275199	WBGene00000103
WBGene00000105	ENSG00000092847	WBGene00000105
WBGene00000105	ENSG00000123908	WBGene00000105
WBGene00000105	ENSG00000126070	WBGene00000105
WBGene00000105	ENSG00000134698	WBGene00000105
WBGene00000107	ENSG00000111275	WBGene00000107
WBGene00000108	ENSG00000137124	WBGene00000108
WBGene00000109	ENSG00000136010	WBGene00000109
WBGene00000109	ENSG00000144908	WBGene00000109
WBGene00000110	ENSG00000072210	WBGene00000110
WBGene00000110	ENSG00000108602	WBGene00000110
WBGene00000111	ENSG00000072210	WBGene00000111
WBGene00000111	ENSG00000108602	WBGene00000111
WBGene00000112	ENSG00000159423	WBGene00000112
WBGene00000113	ENSG00000112294	WBGene00000113
WBGene00000114	ENSG00000119711	WBGene00000114
WBGene00000115	ENSG00000164904	WBGene00000115
WBGene00000116	ENSG00000118514	WBGene00000116
WBGene00000117	ENSG00000143149	WBGene00000117
WBGene00000118	ENSG00000143149	WBGene00000118
WBGene00000121	ENSG00000183684	WBGene00000121
WBGene00000123	ENSG00000181222	WBGene00000123
WBGene00000137	ENSG00000165097	WBGene00000137
WBGene00000142	ENSG00000142230	WBGene00000142
WBGene00000147	ENSG00000117362	WBGene00000147
WBGene00000147	ENSG00000138613	WBGene00000147
WBGene00000148	ENSG00000162736	WBGene00000148
WBGene00000149	ENSG00000084234	WBGene00000149
WBGene00000149	ENSG00000142192	WBGene00000149
WBGene00000150	ENSG00000129354	WBGene00000150
WBGene00000155	ENSG00000108039	WBGene00000155
WBGene00000157	ENSG00000042753	WBGene00000157
WBGene00000158	ENSG00000166747	WBGene00000158
WBGene00000159	ENSG00000106367	WBGene00000159
WBGene00000159	ENSG00000182287	WBGene00000159
WBGene00000159	ENSG00000280852	WBGene00000159
WBGene00000160	ENSG00000100280	WBGene00000160
WBGene00000162	ENSG00000065000	WBGene00000162
WBGene00000164	ENSG00000070718	WBGene00000164
WBGene00000164	ENSG00000185009	WBGene00000164
WBGene00000165	ENSG00000157823	WBGene00000165
WBGene00000165	ENSG00000177879	WBGene00000165
WBGene00000166	ENSG00000100083	WBGene00000166
WBGene00000170	ENSG00000143595	WBGene00000170
WBGene00000170	ENSG00000165272	WBGene00000170
WBGene00000175	ENSG00000143595	WBGene00000175
WBGene00000175	ENSG00000165272	WBGene00000175
WBGene00000176	ENSG00000143595	WBGene00000176
WBGene00000176	ENSG00000165272	WBGene00000176
WBGene00000177	ENSG00000178301	WBGene00000177
WBGene00000180	ENSG00000113595	WBGene00000180
WBGene00000181	ENSG00000072506	WBGene00000181
WBGene00000182	ENSG00000134287	WBGene00000182
WBGene00000182	ENSG00000143761	WBGene00000182
WBGene00000182	ENSG00000272822	WBGene00000182
WBGene00000183	ENSG00000004059	WBGene00000183
WBGene00000183	ENSG00000168374	WBGene00000183
WBGene00000184	ENSG00000165527	WBGene00000184
WBGene00000186	ENSG00000099308	WBGene00000186
WBGene00000187	ENSG00000120805	WBGene00000187
WBGene00000188	ENSG00000138175	WBGene00000188
WBGene00000189	ENSG00000162980	WBGene00000189
WBGene00000189	ENSG00000165997	WBGene00000189
WBGene00000192	ENSG00000134108	WBGene00000192
WBGene00000192	ENSG00000143862	WBGene00000192
WBGene00000193	ENSG00000113966	WBGene00000193
WBGene00000195	ENSG00000137486	WBGene00000195
WBGene00000195	ENSG00000141480	WBGene00000195
WBGene00000197	ENSG00000090861	WBGene00000197
WBGene00000198	ENSG00000099797	WBGene00000198
WBGene00000199	ENSG00000115091	WBGene00000199
WBGene00000200	ENSG00000138071	WBGene00000200
WBGene00000201	ENSG00000241685	WBGene00000201
WBGene00000203	ENSG00000111229	WBGene00000203
WBGene00000204	ENSG00000241553	WBGene00000204
WBGene00000204	ENSG00000250151	WBGene00000204
WBGene00000205	ENSG00000136950	WBGene00000205
WBGene00000205	ENSG00000162704	WBGene00000205
WBGene00000207	ENSG00000116459	WBGene00000207
WBGene00000216	ENSG00000131400	WBGene00000216
WBGene00000216	ENSG00000196188	WBGene00000216
WBGene00000217	ENSG00000117984	WBGene00000217
WBGene00000224	ENSG00000168003	WBGene00000224
WBGene00000225	ENSG00000138079	WBGene00000225
WBGene00000228	ENSG00000072110	WBGene00000228
WBGene00000228	ENSG00000077522	WBGene00000228
WBGene00000228	ENSG00000130402	WBGene00000228
WBGene00000228	ENSG00000248746	WBGene00000228
WBGene00000229	ENSG00000110955	WBGene00000229
WBGene00000230	ENSG00000241837	WBGene00000230
WBGene00000232	ENSG00000101958	WBGene00000232
WBGene00000232	ENSG00000145451	WBGene00000232
WBGene00000232	ENSG00000145888	WBGene00000232
WBGene00000232	ENSG00000188828	WBGene00000232
WBGene00000235	ENSG00000175334	WBGene00000235
WBGene00000240	ENSG00000171759	WBGene00000240
WBGene00000241	ENSG00000256349	WBGene00000241
WBGene00000242	ENSG00000125124	WBGene00000242
WBGene00000244	ENSG00000165533	WBGene00000244
WBGene00000247	ENSG00000126581	WBGene00000247
WBGene00000253	ENSG00000137857	WBGene00000253
WBGene00000253	ENSG00000140279	WBGene00000253
WBGene00000254	ENSG00000115257	WBGene00000254
WBGene00000265	ENSG00000138376	WBGene00000265
WBGene00000266	ENSG00000112699	WBGene00000266
WBGene00000269	ENSG00000086062	WBGene00000269
WBGene00000269	ENSG00000158850	WBGene00000269
WBGene00000270	ENSG00000169255	WBGene00000270
WBGene00000271	ENSG00000185024	WBGene00000271
WBGene00000274	ENSG00000095564	WBGene00000274
WBGene00000276	ENSG00000112578	WBGene00000276
WBGene00000279	ENSG00000063180	WBGene00000279
WBGene00000279	ENSG00000154975	WBGene00000279
WBGene00000280	ENSG00000063180	WBGene00000280
WBGene00000280	ENSG00000154975	WBGene00000280
WBGene00000289	ENSG00000169071	WBGene00000289
WBGene00000289	ENSG00000185483	WBGene00000289
WBGene00000292	ENSG00000116489	WBGene00000292
WBGene00000292	ENSG00000198898	WBGene00000292
WBGene00000293	ENSG00000077549	WBGene00000293
WBGene00000295	ENSG00000036565	WBGene00000295
WBGene00000295	ENSG00000165646	WBGene00000295
WBGene00000296	ENSG00000180176	WBGene00000296
WBGene00000298	ENSG00000131979	WBGene00000298
WBGene00000367	ENSG00000006283	WBGene00000367
WBGene00000367	ENSG00000100346	WBGene00000367
WBGene00000367	ENSG00000196557	WBGene00000367
WBGene00000368	ENSG00000067191	WBGene00000368
WBGene00000368	ENSG00000167535	WBGene00000368
WBGene00000368	ENSG00000182389	WBGene00000368
WBGene00000369	ENSG00000198791	WBGene00000369
WBGene00000371	ENSG00000135940	WBGene00000371
WBGene00000376	ENSG00000113300	WBGene00000376
WBGene00000376	ENSG00000138767	WBGene00000376
WBGene00000377	ENSG00000120438	WBGene00000377
WBGene00000378	ENSG00000166226	WBGene00000378
WBGene00000379	ENSG00000115484	WBGene00000379
WBGene00000380	ENSG00000150753	WBGene00000380
WBGene00000381	ENSG00000132141	WBGene00000381
WBGene00000381	ENSG00000146731	WBGene00000381
WBGene00000382	ENSG00000094804	WBGene00000382
WBGene00000392	ENSG00000158825	WBGene00000392
WBGene00000396	ENSG00000083857	WBGene00000396
WBGene00000396	ENSG00000165323	WBGene00000396
WBGene00000403	ENSG00000171603	WBGene00000403
WBGene00000405	ENSG00000170312	WBGene00000405
WBGene00000406	ENSG00000135446	WBGene00000406
WBGene00000407	ENSG00000164885	WBGene00000407
WBGene00000408	ENSG00000277273	WBGene00000408
WBGene00000409	ENSG00000132964	WBGene00000409
WBGene00000409	ENSG00000155111	WBGene00000409
WBGene00000410	ENSG00000136807	WBGene00000410
WBGene00000414	ENSG00000205642	WBGene00000414
WBGene00000415	ENSG00000145794	WBGene00000415
WBGene00000416	ENSG00000099942	WBGene00000416
WBGene00000416	ENSG00000167193	WBGene00000416
WBGene00000419	ENSG00000150760	WBGene00000419
WBGene00000422	ENSG00000158156	WBGene00000422
WBGene00000422	ENSG00000221947	WBGene00000422
WBGene00000424	ENSG00000169750	WBGene00000424
WBGene00000426	ENSG00000062598	WBGene00000426
WBGene00000426	ENSG00000102890	WBGene00000426
WBGene00000426	ENSG00000155849	WBGene00000426
WBGene00000455	ENSG00000126778	WBGene00000455
WBGene00000455	ENSG00000170577	WBGene00000455
WBGene00000464	ENSG00000072571	WBGene00000464
WBGene00000466	ENSG00000111880	WBGene00000466
WBGene00000468	ENSG00000165702	WBGene00000468
WBGene00000478	ENSG00000111432	WBGene00000478
WBGene00000478	ENSG00000163251	WBGene00000478
WBGene00000478	ENSG00000177283	WBGene00000478
WBGene00000479	ENSG00000110367	WBGene00000479
WBGene00000480	ENSG00000100226	WBGene00000480
WBGene00000481	ENSG00000070748	WBGene00000481
WBGene00000482	ENSG00000111642	WBGene00000482
WBGene00000482	ENSG00000170004	WBGene00000482
WBGene00000484	ENSG00000068885	WBGene00000484
WBGene00000484	ENSG00000248710	WBGene00000484
WBGene00000485	ENSG00000187240	WBGene00000485
WBGene00000490	ENSG00000187535	WBGene00000490
WBGene00000491	ENSG00000198718	WBGene00000491
WBGene00000492	ENSG00000114446	WBGene00000492
WBGene00000493	ENSG00000140323	WBGene00000493
WBGene00000498	ENSG00000149554	WBGene00000498
WBGene00000499	ENSG00000183765	WBGene00000499
WBGene00000500	ENSG00000103266	WBGene00000500
WBGene00000501	ENSG00000115665	WBGene00000501
WBGene00000502	ENSG00000110172	WBGene00000502
WBGene00000503	ENSG00000133063	WBGene00000503
WBGene00000506	ENSG00000112237	WBGene00000506
WBGene00000508	ENSG00000221978	WBGene00000508
WBGene00000509	ENSG00000100288	WBGene00000509
WBGene00000509	ENSG00000110721	WBGene00000509
WBGene00000510	ENSG00000100288	WBGene00000510
WBGene00000510	ENSG00000110721	WBGene00000510
WBGene00000515	ENSG00000139163	WBGene00000515
WBGene00000518	ENSG00000004660	WBGene00000518
WBGene00000519	ENSG00000196419	WBGene00000519
WBGene00000520	ENSG00000079246	WBGene00000520
WBGene00000530	ENSG00000114859	WBGene00000530
WBGene00000530	ENSG00000188037	WBGene00000530
WBGene00000532	ENSG00000109572	WBGene00000532
WBGene00000533	ENSG00000103249	WBGene00000533
WBGene00000536	ENSG00000167186	WBGene00000536
WBGene00000537	ENSG00000100726	WBGene00000537
WBGene00000539	ENSG00000188603	WBGene00000539
WBGene00000540	ENSG00000188603	WBGene00000540
WBGene00000543	ENSG00000131375	WBGene00000543
WBGene00000545	ENSG00000135773	WBGene00000545
WBGene00000545	ENSG00000137225	WBGene00000545
WBGene00000545	ENSG00000162909	WBGene00000545
WBGene00000545	ENSG00000203697	WBGene00000545
WBGene00000549	ENSG00000074054	WBGene00000549
WBGene00000549	ENSG00000163539	WBGene00000549
WBGene00000552	ENSG00000143933	WBGene00000552
WBGene00000552	ENSG00000160014	WBGene00000552
WBGene00000552	ENSG00000198668	WBGene00000552
WBGene00000553	ENSG00000134072	WBGene00000553
WBGene00000553	ENSG00000183049	WBGene00000553
WBGene00000554	ENSG00000221823	WBGene00000554
WBGene00000566	ENSG00000133612	WBGene00000566
WBGene00000566	ENSG00000157985	WBGene00000566
WBGene00000567	ENSG00000127022	WBGene00000567
WBGene00000567	ENSG00000153132	WBGene00000567
WBGene00000583	ENSG00000186417	WBGene00000583
WBGene00000585	ENSG00000135775	WBGene00000585
WBGene00000591	ENSG00000164754	WBGene00000591
WBGene00000591	ENSG00000244588	WBGene00000591
WBGene00000614	ENSG00000205863	WBGene00000614
WBGene00000614	ENSG00000240654	WBGene00000614
WBGene00000674	ENSG00000197467	WBGene00000674
WBGene00000694	ENSG00000182447	WBGene00000694
WBGene00000698	ENSG00000105327	WBGene00000698
WBGene00000708	ENSG00000188517	WBGene00000708
WBGene00000749	ENSG00000105327	WBGene00000749
WBGene00000761	ENSG00000148459	WBGene00000761
WBGene00000762	ENSG00000173085	WBGene00000762
WBGene00000763	ENSG00000132423	WBGene00000763
WBGene00000764	ENSG00000167113	WBGene00000764
WBGene00000765	ENSG00000110871	WBGene00000765
WBGene00000766	ENSG00000119723	WBGene00000766
WBGene00000768	ENSG00000102879	WBGene00000768
WBGene00000768	ENSG00000110880	WBGene00000768
WBGene00000768	ENSG00000167549	WBGene00000768
WBGene00000768	ENSG00000172725	WBGene00000768
WBGene00000773	ENSG00000101138	WBGene00000773
WBGene00000777	ENSG00000144834	WBGene00000777
WBGene00000777	ENSG00000149591	WBGene00000777
WBGene00000777	ENSG00000158710	WBGene00000777
WBGene00000778	ENSG00000144834	WBGene00000778
WBGene00000778	ENSG00000149591	WBGene00000778
WBGene00000778	ENSG00000158710	WBGene00000778
WBGene00000781	ENSG00000164733	WBGene00000781
WBGene00000783	ENSG00000164733	WBGene00000783
WBGene00000784	ENSG00000164733	WBGene00000784
WBGene00000786	ENSG00000164733	WBGene00000786
WBGene00000787	ENSG00000167136	WBGene00000787
WBGene00000788	ENSG00000101160	WBGene00000788
WBGene00000792	ENSG00000134376	WBGene00000792
WBGene00000794	ENSG00000168496	WBGene00000794
WBGene00000798	ENSG00000077348	WBGene00000798
WBGene00000799	ENSG00000105612	WBGene00000799
WBGene00000799	ENSG00000137976	WBGene00000799
WBGene00000800	ENSG00000278191	WBGene00000800
WBGene00000802	ENSG00000179218	WBGene00000802
WBGene00000812	ENSG00000103653	WBGene00000812
WBGene00000813	ENSG00000169727	WBGene00000813
WBGene00000814	ENSG00000166200	WBGene00000814
WBGene00000816	ENSG00000138663	WBGene00000816
WBGene00000817	ENSG00000121022	WBGene00000817
WBGene00000822	ENSG00000118729	WBGene00000822
WBGene00000822	ENSG00000143318	WBGene00000822
WBGene00000829	ENSG00000198727	WBGene00000829
WBGene00000830	ENSG00000121691	WBGene00000830
WBGene00000832	ENSG00000119326	WBGene00000832
WBGene00000833	ENSG00000062485	WBGene00000833
WBGene00000834	ENSG00000123191	WBGene00000834
WBGene00000834	ENSG00000165240	WBGene00000834
WBGene00000836	ENSG00000055130	WBGene00000836
WBGene00000837	ENSG00000108094	WBGene00000837
WBGene00000838	ENSG00000036257	WBGene00000838
WBGene00000839	ENSG00000139842	WBGene00000839
WBGene00000839	ENSG00000158290	WBGene00000839
WBGene00000840	ENSG00000166266	WBGene00000840
WBGene00000843	ENSG00000136986	WBGene00000843
WBGene00000846	ENSG00000055732	WBGene00000846
WBGene00000846	ENSG00000090674	WBGene00000846
WBGene00000857	ENSG00000162552	WBGene00000857
WBGene00000858	ENSG00000111186	WBGene00000858
WBGene00000858	ENSG00000114251	WBGene00000858
WBGene00000865	ENSG00000157456	WBGene00000865
WBGene00000867	ENSG00000157456	WBGene00000867
WBGene00000869	ENSG00000179091	WBGene00000869
WBGene00000870	ENSG00000112576	WBGene00000870
WBGene00000874	ENSG00000170832	WBGene00000874
WBGene00000876	ENSG00000163660	WBGene00000876
WBGene00000877	ENSG00000108179	WBGene00000877
WBGene00000878	ENSG00000236334	WBGene00000878
WBGene00000878	ENSG00000256374	WBGene00000878
WBGene00000878	ENSG00000263464	WBGene00000878
WBGene00000878	ENSG00000279782	WBGene00000878
WBGene00000880	ENSG00000100023	WBGene00000880
WBGene00000881	ENSG00000166794	WBGene00000881
WBGene00000883	ENSG00000236334	WBGene00000883
WBGene00000883	ENSG00000256374	WBGene00000883
WBGene00000883	ENSG00000263464	WBGene00000883
WBGene00000883	ENSG00000279782	WBGene00000883
WBGene00000886	ENSG00000240344	WBGene00000886
WBGene00000887	ENSG00000171960	WBGene00000887
WBGene00000888	ENSG00000137168	WBGene00000888
WBGene00000889	ENSG00000084072	WBGene00000889
WBGene00000890	ENSG00000131013	WBGene00000890
WBGene00000891	ENSG00000113593	WBGene00000891
WBGene00000892	ENSG00000153015	WBGene00000892
WBGene00000896	ENSG00000129562	WBGene00000896
WBGene00000898	ENSG00000027644	WBGene00000898
WBGene00000898	ENSG00000140443	WBGene00000898
WBGene00000898	ENSG00000171105	WBGene00000898
WBGene00000902	ENSG00000276595	WBGene00000902
WBGene00000903	ENSG00000135414	WBGene00000903
WBGene00000906	ENSG00000163913	WBGene00000906
WBGene00000917	ENSG00000106524	WBGene00000917
WBGene00000923	ENSG00000102030	WBGene00019505	Merged to WBGene00001475
WBGene00000923	ENSG00000156269	WBGene00019505	Merged to WBGene00001475
WBGene00000933	ENSG00000132676	WBGene00000933
WBGene00000934	ENSG00000103546	WBGene00000934
WBGene00000936	ENSG00000163217	WBGene00000936
WBGene00000937	ENSG00000138231	WBGene00000937
WBGene00000940	ENSG00000110063	WBGene00000940
WBGene00000941	ENSG00000126953	WBGene00000941
WBGene00000942	ENSG00000035403	WBGene00000942
WBGene00000958	ENSG00000145214	WBGene00000958
WBGene00000959	ENSG00000153933	WBGene00000959
WBGene00000960	ENSG00000136267	WBGene00000960
WBGene00000962	ENSG00000197102	WBGene00000962
WBGene00000963	ENSG00000147647	WBGene00000963
WBGene00000964	ENSG00000147647	WBGene00000964
WBGene00000966	ENSG00000025423	WBGene00000966
WBGene00000966	ENSG00000073737	WBGene00000966
WBGene00000966	ENSG00000135437	WBGene00000966
WBGene00000966	ENSG00000139547	WBGene00000966
WBGene00000966	ENSG00000170426	WBGene00000966
WBGene00000973	ENSG00000157379	WBGene00000973
WBGene00000979	ENSG00000025423	WBGene00000979
WBGene00000979	ENSG00000073737	WBGene00000979
WBGene00000979	ENSG00000135437	WBGene00000979
WBGene00000979	ENSG00000139547	WBGene00000979
WBGene00000979	ENSG00000170426	WBGene00000979
WBGene00000981	ENSG00000119471	WBGene00000981
WBGene00000982	ENSG00000170786	WBGene00000982
WBGene00000983	ENSG00000025423	WBGene00000983
WBGene00000983	ENSG00000073737	WBGene00000983
WBGene00000983	ENSG00000135437	WBGene00000983
WBGene00000983	ENSG00000139547	WBGene00000983
WBGene00000983	ENSG00000170426	WBGene00000983
WBGene00000990	ENSG00000103160	WBGene00000990
WBGene00000990	ENSG00000149084	WBGene00000990
WBGene00000993	ENSG00000109016	WBGene00000993
WBGene00000994	ENSG00000165359	WBGene00000994
WBGene00000996	ENSG00000178537	WBGene00000996
WBGene00000998	ENSG00000181143	WBGene00000998
WBGene00001001	ENSG00000083520	WBGene00001001
WBGene00001002	ENSG00000014138	WBGene00001002
WBGene00001005	ENSG00000264364	WBGene00001005
WBGene00001006	ENSG00000075711	WBGene00001006
WBGene00001006	ENSG00000132535	WBGene00001006
WBGene00001007	ENSG00000135720	WBGene00001007
WBGene00001007	ENSG00000144635	WBGene00001007
WBGene00001016	ENSG00000138346	WBGene00001016
WBGene00001017	ENSG00000204843	WBGene00001017
WBGene00001018	ENSG00000175203	WBGene00001018
WBGene00001019	ENSG00000148719	WBGene00001019
WBGene00001019	ENSG00000164031	WBGene00001019
WBGene00001020	ENSG00000059769	WBGene00001020
WBGene00001025	ENSG00000102580	WBGene00001025
WBGene00001026	ENSG00000116138	WBGene00001026
WBGene00001027	ENSG00000007923	WBGene00001027
WBGene00001028	ENSG00000276726	WBGene00001028
WBGene00001029	ENSG00000105821	WBGene00001029
WBGene00001030	ENSG00000086061	WBGene00001030
WBGene00001030	ENSG00000140403	WBGene00001030
WBGene00001032	ENSG00000163793	WBGene00001032
WBGene00001033	ENSG00000100209	WBGene00001033
WBGene00001035	ENSG00000168724	WBGene00001035
WBGene00001037	ENSG00000069345	WBGene00001037
WBGene00001038	ENSG00000090520	WBGene00001038
WBGene00001039	ENSG00000120675	WBGene00001039
WBGene00001039	ENSG00000205981	WBGene00001039
WBGene00001040	ENSG00000104129	WBGene00001040
WBGene00001041	ENSG00000213551	WBGene00001041
WBGene00001042	ENSG00000105993	WBGene00001042
WBGene00001045	ENSG00000077232	WBGene00001045
WBGene00001046	ENSG00000102580	WBGene00001046
WBGene00001047	ENSG00000025796	WBGene00001047
WBGene00001048	ENSG00000126698	WBGene00001048
WBGene00001049	ENSG00000136492	WBGene00001049
WBGene00001050	ENSG00000234798	WBGene00001050
WBGene00001050	ENSG00000236765	WBGene00001050
WBGene00001051	ENSG00000123975	WBGene00001051
WBGene00001051	ENSG00000173207	WBGene00001051
WBGene00001052	ENSG00000169676	WBGene00001052
WBGene00001054	ENSG00000078098	WBGene00001054
WBGene00001054	ENSG00000197635	WBGene00001054
WBGene00001055	ENSG00000078098	WBGene00001055
WBGene00001055	ENSG00000197635	WBGene00001055
WBGene00001056	ENSG00000142002	WBGene00001056
WBGene00001058	ENSG00000164062	WBGene00001058
WBGene00001073	ENSG00000139921	WBGene00001073
WBGene00001077	ENSG00000072682	WBGene00001077
WBGene00001077	ENSG00000122884	WBGene00001077
WBGene00001078	ENSG00000173852	WBGene00001078
WBGene00001082	ENSG00000161203	WBGene00001082
WBGene00001086	ENSG00000113810	WBGene00001086
WBGene00001087	ENSG00000010292	WBGene00001087
WBGene00001089	ENSG00000138081	WBGene00001089
WBGene00001090	ENSG00000107201	WBGene00001090
WBGene00001092	ENSG00000117505	WBGene00001092
WBGene00001094	ENSG00000115866	WBGene00001094
WBGene00001095	ENSG00000117593	WBGene00001095
WBGene00001101	ENSG00000004975	WBGene00001101
WBGene00001101	ENSG00000107404	WBGene00001101
WBGene00001101	ENSG00000161202	WBGene00001101
WBGene00001110	ENSG00000131864	WBGene00001110
WBGene00001113	ENSG00000189001	WBGene00001113
WBGene00001115	ENSG00000134769	WBGene00001115
WBGene00001115	ENSG00000138101	WBGene00001115
WBGene00001117	ENSG00000196659	WBGene00001117
WBGene00001117	ENSG00000197557	WBGene00001117
WBGene00001118	ENSG00000157796	WBGene00001118
WBGene00001119	ENSG00000103351	WBGene00001119
WBGene00001127	ENSG00000204104	WBGene00001127
WBGene00001129	ENSG00000105948	WBGene00001129
WBGene00001130	ENSG00000079805	WBGene00001130
WBGene00001130	ENSG00000106976	WBGene00001130
WBGene00001130	ENSG00000197959	WBGene00001130
WBGene00001131	ENSG00000152818	WBGene00001131
WBGene00001134	ENSG00000198836	WBGene00001134
WBGene00001135	ENSG00000091664	WBGene00001135
WBGene00001135	ENSG00000104888	WBGene00001135
WBGene00001135	ENSG00000179520	WBGene00001135
WBGene00001137	ENSG00000018625	WBGene00001137
WBGene00001137	ENSG00000105409	WBGene00001137
WBGene00001137	ENSG00000163399	WBGene00001137
WBGene00001149	ENSG00000060982	WBGene00001149
WBGene00001151	ENSG00000134463	WBGene00001151
WBGene00001153	ENSG00000198721	WBGene00001153
WBGene00001154	ENSG00000121310	WBGene00001154
WBGene00001154	ENSG00000148090	WBGene00001154
WBGene00001155	ENSG00000127884	WBGene00001155
WBGene00001156	ENSG00000127884	WBGene00001156
WBGene00001160	ENSG00000103319	WBGene00001160
WBGene00001166	ENSG00000108883	WBGene00001166
WBGene00001167	ENSG00000167658	WBGene00001167
WBGene00001169	ENSG00000101210	WBGene00001169
WBGene00001169	ENSG00000156508	WBGene00001169
WBGene00001171	ENSG00000140015	WBGene00001171
WBGene00001171	ENSG00000143473	WBGene00001171
WBGene00001172	ENSG00000125851	WBGene00001172
WBGene00001177	ENSG00000101333	WBGene00001177
WBGene00001179	ENSG00000182732	WBGene00001179
WBGene00001179	ENSG00000182901	WBGene00001179
WBGene00001187	ENSG00000102001	WBGene00001187
WBGene00001187	ENSG00000151067	WBGene00001187
WBGene00001187	ENSG00000157388	WBGene00001187
WBGene00001188	ENSG00000002745	WBGene00001188
WBGene00001189	ENSG00000109472	WBGene00001189
WBGene00001189	ENSG00000120054	WBGene00001189
WBGene00001196	ENSG00000088256	WBGene00001196
WBGene00001196	ENSG00000156052	WBGene00001196
WBGene00001202	ENSG00000129159	WBGene00001202
WBGene00001202	ENSG00000166006	WBGene00001202
WBGene00001208	ENSG00000007866	WBGene00001208
WBGene00001208	ENSG00000187079	WBGene00001208
WBGene00001208	ENSG00000197905	WBGene00001208
WBGene00001209	ENSG00000107581	WBGene00001209
WBGene00001215	ENSG00000076201	WBGene00001215
WBGene00001223	ENSG00000167635	WBGene00001223
WBGene00001225	ENSG00000106263	WBGene00001225
WBGene00001227	ENSG00000100353	WBGene00001227
WBGene00001228	ENSG00000104408	WBGene00001228
WBGene00001229	ENSG00000175390	WBGene00001229
WBGene00001230	ENSG00000130811	WBGene00001230
WBGene00001231	ENSG00000147677	WBGene00001231
WBGene00001232	ENSG00000084623	WBGene00001232
WBGene00001233	ENSG00000178982	WBGene00001233
WBGene00001234	ENSG00000242372	WBGene00001234
WBGene00001235	ENSG00000103363	WBGene00001235
WBGene00001236	ENSG00000154582	WBGene00001236
WBGene00001247	ENSG00000170522	WBGene00001247
WBGene00001248	ENSG00000066629	WBGene00001248
WBGene00001248	ENSG00000125746	WBGene00001248
WBGene00001248	ENSG00000149499	WBGene00001248
WBGene00001258	ENSG00000021776	WBGene00001258
WBGene00001259	ENSG00000109111	WBGene00001259
WBGene00001303	ENSG00000132432	WBGene00001303
WBGene00001328	ENSG00000053747	WBGene00001328
WBGene00001328	ENSG00000130702	WBGene00001328
WBGene00001329	ENSG00000063245	WBGene00001329
WBGene00001329	ENSG00000072134	WBGene00001329
WBGene00001330	ENSG00000131037	WBGene00001330
WBGene00001330	ENSG00000151491	WBGene00001330
WBGene00001330	ENSG00000177106	WBGene00001330
WBGene00001331	ENSG00000136240	WBGene00001331
WBGene00001333	ENSG00000092820	WBGene00001333
WBGene00001333	ENSG00000137710	WBGene00001333
WBGene00001333	ENSG00000147065	WBGene00001333
WBGene00001334	ENSG00000086619	WBGene00001334
WBGene00001335	ENSG00000097033	WBGene00001335
WBGene00001335	ENSG00000148341	WBGene00001335
WBGene00001352	ENSG00000083642	WBGene00001352
WBGene00001352	ENSG00000121892	WBGene00001352
WBGene00001358	ENSG00000213465	WBGene00001358
WBGene00001366	ENSG00000146192	WBGene00001366
WBGene00001368	ENSG00000066044	WBGene00001368
WBGene00001368	ENSG00000107105	WBGene00001368
WBGene00001368	ENSG00000196361	WBGene00001368
WBGene00001371	ENSG00000155962	WBGene00001371
WBGene00001371	ENSG00000169504	WBGene00001371
WBGene00001372	ENSG00000100823	WBGene00001372
WBGene00001374	ENSG00000124134	WBGene00001374
WBGene00001374	ENSG00000156486	WBGene00001374
WBGene00001374	ENSG00000164794	WBGene00001374
WBGene00001374	ENSG00000170745	WBGene00001374
WBGene00001377	ENSG00000104313	WBGene00001377
WBGene00001396	ENSG00000149485	WBGene00001396
WBGene00001396	ENSG00000221968	WBGene00001396
WBGene00001399	ENSG00000099194	WBGene00001399
WBGene00001399	ENSG00000145284	WBGene00001399
WBGene00001403	ENSG00000077942	WBGene00001403
WBGene00001404	ENSG00000130957	WBGene00001404
WBGene00001404	ENSG00000165140	WBGene00001404
WBGene00001405	ENSG00000084073	WBGene00001405
WBGene00001406	ENSG00000173653	WBGene00001406
WBGene00001412	ENSG00000100034	WBGene00001412
WBGene00001414	ENSG00000135636	WBGene00001414
WBGene00001414	ENSG00000138119	WBGene00001414
WBGene00001423	ENSG00000280548	WBGene00001423
WBGene00001424	ENSG00000214253	WBGene00001424
WBGene00001425	ENSG00000214253	WBGene00001425
WBGene00001426	ENSG00000173486	WBGene00001426
WBGene00001427	ENSG00000088832	WBGene00001427
WBGene00001427	ENSG00000119782	WBGene00001427
WBGene00001431	ENSG00000004478	WBGene00001431
WBGene00001443	ENSG00000177731	WBGene00001443
WBGene00001475	ENSG00000008300	WBGene00001475
WBGene00001475	ENSG00000075275	WBGene00001475
WBGene00001475	ENSG00000143126	WBGene00001475
WBGene00001478	ENSG00000007933	WBGene00001478
WBGene00001478	ENSG00000094963	WBGene00001478
WBGene00001478	ENSG00000131781	WBGene00001478
WBGene00001480	ENSG00000007933	WBGene00001480
WBGene00001480	ENSG00000094963	WBGene00001480
WBGene00001480	ENSG00000131781	WBGene00001480
WBGene00001485	ENSG00000188566	WBGene00001485
WBGene00001487	ENSG00000074966	WBGene00001487
WBGene00001488	ENSG00000277518	WBGene00001488
WBGene00001497	ENSG00000179115	WBGene00001497
WBGene00001498	ENSG00000116120	WBGene00001498
WBGene00001499	ENSG00000174013	WBGene00001499
WBGene00001501	ENSG00000167996	WBGene00001501
WBGene00001501	ENSG00000181867	WBGene00001501
WBGene00001502	ENSG00000164924	WBGene00001502
WBGene00001502	ENSG00000166913	WBGene00001502
WBGene00001503	ENSG00000091483	WBGene00001503
WBGene00001507	ENSG00000180549	WBGene00001507
WBGene00001508	ENSG00000033170	WBGene00001508
WBGene00001509	ENSG00000116688	WBGene00001509
WBGene00001509	ENSG00000171109	WBGene00001509
WBGene00001511	ENSG00000105325	WBGene00001511
WBGene00001513	ENSG00000082068	WBGene00001513
WBGene00001515	ENSG00000280477	WBGene00001515
WBGene00001519	ENSG00000168539	WBGene00001519
WBGene00001519	ENSG00000181072	WBGene00001519
WBGene00001520	ENSG00000158864	WBGene00001520
WBGene00001522	ENSG00000129151	WBGene00001522
WBGene00001523	ENSG00000185973	WBGene00001523
WBGene00001527	ENSG00000001084	WBGene00001527
WBGene00001558	ENSG00000057608	WBGene00001558
WBGene00001558	ENSG00000203879	WBGene00001558
WBGene00001577	ENSG00000085719	WBGene00001577
WBGene00001577	ENSG00000124772	WBGene00001577
WBGene00001577	ENSG00000139117	WBGene00001577
WBGene00001579	ENSG00000280618	WBGene00001579
WBGene00001581	ENSG00000074181	WBGene00001581
WBGene00001585	ENSG00000127337	WBGene00001585
WBGene00001590	ENSG00000144182	WBGene00001590
WBGene00001591	ENSG00000101958	WBGene00001591
WBGene00001591	ENSG00000145451	WBGene00001591
WBGene00001591	ENSG00000145888	WBGene00001591
WBGene00001591	ENSG00000188828	WBGene00001591
WBGene00001593	ENSG00000101958	WBGene00001593
WBGene00001593	ENSG00000145451	WBGene00001593
WBGene00001593	ENSG00000145888	WBGene00001593
WBGene00001593	ENSG00000188828	WBGene00001593
WBGene00001599	ENSG00000142156	WBGene00001599
WBGene00001615	ENSG00000171189	WBGene00001615
WBGene00001620	ENSG00000110436	WBGene00001620
WBGene00001622	ENSG00000105143	WBGene00001622
WBGene00001622	ENSG00000106688	WBGene00001622
WBGene00001623	ENSG00000105143	WBGene00001623
WBGene00001623	ENSG00000106688	WBGene00001623
WBGene00001626	ENSG00000111846	WBGene00001626
WBGene00001626	ENSG00000140297	WBGene00001626
WBGene00001626	ENSG00000187210	WBGene00001626
WBGene00001627	ENSG00000152127	WBGene00001627
WBGene00001627	ENSG00000167889	WBGene00001627
WBGene00001628	ENSG00000141429	WBGene00001628
WBGene00001629	ENSG00000143641	WBGene00001629
WBGene00001631	ENSG00000144278	WBGene00001631
WBGene00001632	ENSG00000109586	WBGene00001632
WBGene00001635	ENSG00000164574	WBGene00001635
WBGene00001636	ENSG00000178234	WBGene00001636
WBGene00001638	ENSG00000131446	WBGene00001638
WBGene00001639	ENSG00000131446	WBGene00001639
WBGene00001640	ENSG00000111846	WBGene00001640
WBGene00001640	ENSG00000140297	WBGene00001640
WBGene00001640	ENSG00000187210	WBGene00001640
WBGene00001641	ENSG00000111846	WBGene00001641
WBGene00001641	ENSG00000140297	WBGene00001641
WBGene00001641	ENSG00000187210	WBGene00001641
WBGene00001642	ENSG00000111846	WBGene00001642
WBGene00001642	ENSG00000140297	WBGene00001642
WBGene00001642	ENSG00000187210	WBGene00001642
WBGene00001643	ENSG00000111846	WBGene00001643
WBGene00001643	ENSG00000140297	WBGene00001643
WBGene00001643	ENSG00000187210	WBGene00001643
WBGene00001644	ENSG00000111846	WBGene00001644
WBGene00001644	ENSG00000140297	WBGene00001644
WBGene00001644	ENSG00000187210	WBGene00001644
WBGene00001645	ENSG00000168282	WBGene00001645
WBGene00001646	ENSG00000100522	WBGene00001646
WBGene00001648	ENSG00000087258	WBGene00001648
WBGene00001650	ENSG00000163638	WBGene00001650
WBGene00001660	ENSG00000038532	WBGene00001660
WBGene00001661	ENSG00000198522	WBGene00001661
WBGene00001662	ENSG00000100347	WBGene00001662
WBGene00001666	ENSG00000065135	WBGene00001666
WBGene00001666	ENSG00000114353	WBGene00001666
WBGene00001666	ENSG00000127955	WBGene00001666
WBGene00001674	ENSG00000120063	WBGene00001674
WBGene00001674	ENSG00000146535	WBGene00001674
WBGene00001678	ENSG00000065135	WBGene00001678
WBGene00001678	ENSG00000114353	WBGene00001678
WBGene00001678	ENSG00000127955	WBGene00001678
WBGene00001679	ENSG00000078369	WBGene00001679
WBGene00001679	ENSG00000114450	WBGene00001679
WBGene00001679	ENSG00000172354	WBGene00001679
WBGene00001680	ENSG00000069966	WBGene00001680
WBGene00001681	ENSG00000172380	WBGene00001681
WBGene00001681	ENSG00000176533	WBGene00001681
WBGene00001687	ENSG00000076716	WBGene00001687
WBGene00001687	ENSG00000183098	WBGene00001687
WBGene00001708	ENSG00000198055	WBGene00001708
WBGene00001708	ENSG00000198873	WBGene00001708
WBGene00001709	ENSG00000100077	WBGene00001709
WBGene00001709	ENSG00000173020	WBGene00001709
WBGene00001734	ENSG00000165655	WBGene00001734
WBGene00001740	ENSG00000043514	WBGene00001740
WBGene00001743	ENSG00000008256	WBGene00001743
WBGene00001743	ENSG00000100055	WBGene00001743
WBGene00001743	ENSG00000105443	WBGene00001743
WBGene00001743	ENSG00000108669	WBGene00001743
WBGene00001744	ENSG00000106105	WBGene00001744
WBGene00001745	ENSG00000087460	WBGene00001745
WBGene00001746	ENSG00000082701	WBGene00001746
WBGene00001746	ENSG00000105723	WBGene00001746
WBGene00001747	ENSG00000213639	WBGene00001747
WBGene00001748	ENSG00000172531	WBGene00001748
WBGene00001748	ENSG00000186298	WBGene00001748
WBGene00001749	ENSG00000084207	WBGene00001749
WBGene00001752	ENSG00000163106	WBGene00001752
WBGene00001758	ENSG00000084207	WBGene00001758
WBGene00001759	ENSG00000163106	WBGene00001759
WBGene00001771	ENSG00000084207	WBGene00001771
WBGene00001790	ENSG00000100577	WBGene00001790
WBGene00001792	ENSG00000065621	WBGene00001792
WBGene00001792	ENSG00000148834	WBGene00001792
WBGene00001793	ENSG00000104812	WBGene00001793
WBGene00001793	ENSG00000111713	WBGene00001793
WBGene00001795	ENSG00000083067	WBGene00001795
WBGene00001795	ENSG00000092439	WBGene00001795
WBGene00001796	ENSG00000083067	WBGene00001796
WBGene00001796	ENSG00000092439	WBGene00001796
WBGene00001808	ENSG00000172850	WBGene00001808
WBGene00001813	ENSG00000135776	WBGene00001813
WBGene00001815	ENSG00000115657	WBGene00001815
WBGene00001816	ENSG00000197150	WBGene00001816
WBGene00001819	ENSG00000150967	WBGene00001819
WBGene00001823	ENSG00000125877	WBGene00001823
WBGene00001824	ENSG00000130182	WBGene00001824
WBGene00001827	ENSG00000111727	WBGene00001827
WBGene00001836	ENSG00000116478	WBGene00001836
WBGene00001836	ENSG00000196591	WBGene00001836
WBGene00001840	ENSG00000123136	WBGene00001840
WBGene00001840	ENSG00000235439	WBGene00001840
WBGene00001840	ENSG00000237889	WBGene00001840
WBGene00001843	ENSG00000113924	WBGene00001843
WBGene00001844	ENSG00000167861	WBGene00001844
WBGene00001855	ENSG00000124610	WBGene00001855
WBGene00001860	ENSG00000072501	WBGene00001860
WBGene00001862	ENSG00000176635	WBGene00001862
WBGene00001863	ENSG00000143341	WBGene00001863
WBGene00001869	ENSG00000143228	WBGene00001869
WBGene00001872	ENSG00000057468	WBGene00001872
WBGene00001887	ENSG00000197153	WBGene00001887
WBGene00001887	ENSG00000203818	WBGene00001887
WBGene00001887	ENSG00000203852	WBGene00001887
WBGene00001888	ENSG00000275126	WBGene00001888
WBGene00001889	ENSG00000124635	WBGene00001889
WBGene00001889	ENSG00000146047	WBGene00001889
WBGene00001889	ENSG00000158373	WBGene00001889
WBGene00001889	ENSG00000184678	WBGene00001889
WBGene00001889	ENSG00000185130	WBGene00001889
WBGene00001889	ENSG00000196890	WBGene00001889
WBGene00001889	ENSG00000197903	WBGene00001889
WBGene00001889	ENSG00000203814	WBGene00001889
WBGene00001889	ENSG00000234289	WBGene00001889
WBGene00001889	ENSG00000273703	WBGene00001889
WBGene00001889	ENSG00000274641	WBGene00001889
WBGene00001889	ENSG00000275713	WBGene00001889
WBGene00001889	ENSG00000276410	WBGene00001889
WBGene00001889	ENSG00000278588	WBGene00001889
WBGene00001909	ENSG00000164508	WBGene00001909
WBGene00001909	ENSG00000180573	WBGene00001909
WBGene00001909	ENSG00000181218	WBGene00001909
WBGene00001909	ENSG00000184260	WBGene00001909
WBGene00001909	ENSG00000184270	WBGene00001909
WBGene00001909	ENSG00000188486	WBGene00001909
WBGene00001909	ENSG00000196866	WBGene00001909
WBGene00001909	ENSG00000246705	WBGene00001909
WBGene00001909	ENSG00000272196	WBGene00001909
WBGene00001909	ENSG00000276368	WBGene00001909
WBGene00001909	ENSG00000277075	WBGene00001909
WBGene00001909	ENSG00000278677	WBGene00001909
WBGene00001913	ENSG00000124635	WBGene00001913
WBGene00001913	ENSG00000146047	WBGene00001913
WBGene00001913	ENSG00000158373	WBGene00001913
WBGene00001913	ENSG00000184678	WBGene00001913
WBGene00001913	ENSG00000185130	WBGene00001913
WBGene00001913	ENSG00000196890	WBGene00001913
WBGene00001913	ENSG00000197903	WBGene00001913
WBGene00001913	ENSG00000203814	WBGene00001913
WBGene00001913	ENSG00000234289	WBGene00001913
WBGene00001913	ENSG00000273703	WBGene00001913
WBGene00001913	ENSG00000274641	WBGene00001913
WBGene00001913	ENSG00000275713	WBGene00001913
WBGene00001913	ENSG00000276410	WBGene00001913
WBGene00001913	ENSG00000278588	WBGene00001913
WBGene00001915	ENSG00000124635	WBGene00001915
WBGene00001915	ENSG00000146047	WBGene00001915
WBGene00001915	ENSG00000158373	WBGene00001915
WBGene00001915	ENSG00000184678	WBGene00001915
WBGene00001915	ENSG00000185130	WBGene00001915
WBGene00001915	ENSG00000196890	WBGene00001915
WBGene00001915	ENSG00000197903	WBGene00001915
WBGene00001915	ENSG00000203814	WBGene00001915
WBGene00001915	ENSG00000234289	WBGene00001915
WBGene00001915	ENSG00000273703	WBGene00001915
WBGene00001915	ENSG00000274641	WBGene00001915
WBGene00001915	ENSG00000275713	WBGene00001915
WBGene00001915	ENSG00000276410	WBGene00001915
WBGene00001915	ENSG00000278588	WBGene00001915
WBGene00001928	ENSG00000124635	WBGene00001928
WBGene00001928	ENSG00000146047	WBGene00001928
WBGene00001928	ENSG00000158373	WBGene00001928
WBGene00001928	ENSG00000184678	WBGene00001928
WBGene00001928	ENSG00000185130	WBGene00001928
WBGene00001928	ENSG00000196890	WBGene00001928
WBGene00001928	ENSG00000197903	WBGene00001928
WBGene00001928	ENSG00000203814	WBGene00001928
WBGene00001928	ENSG00000234289	WBGene00001928
WBGene00001928	ENSG00000273703	WBGene00001928
WBGene00001928	ENSG00000274641	WBGene00001928
WBGene00001928	ENSG00000275713	WBGene00001928
WBGene00001928	ENSG00000276410	WBGene00001928
WBGene00001928	ENSG00000278588	WBGene00001928
WBGene00001931	ENSG00000164508	WBGene00001931
WBGene00001931	ENSG00000180573	WBGene00001931
WBGene00001931	ENSG00000181218	WBGene00001931
WBGene00001931	ENSG00000184260	WBGene00001931
WBGene00001931	ENSG00000184270	WBGene00001931
WBGene00001931	ENSG00000188486	WBGene00001931
WBGene00001931	ENSG00000196866	WBGene00001931
WBGene00001931	ENSG00000246705	WBGene00001931
WBGene00001931	ENSG00000272196	WBGene00001931
WBGene00001931	ENSG00000276368	WBGene00001931
WBGene00001931	ENSG00000277075	WBGene00001931
WBGene00001931	ENSG00000278677	WBGene00001931
WBGene00001940	ENSG00000124635	WBGene00001940
WBGene00001940	ENSG00000146047	WBGene00001940
WBGene00001940	ENSG00000158373	WBGene00001940
WBGene00001940	ENSG00000184678	WBGene00001940
WBGene00001940	ENSG00000185130	WBGene00001940
WBGene00001940	ENSG00000196890	WBGene00001940
WBGene00001940	ENSG00000197903	WBGene00001940
WBGene00001940	ENSG00000203814	WBGene00001940
WBGene00001940	ENSG00000234289	WBGene00001940
WBGene00001940	ENSG00000273703	WBGene00001940
WBGene00001940	ENSG00000274641	WBGene00001940
WBGene00001940	ENSG00000275713	WBGene00001940
WBGene00001940	ENSG00000276410	WBGene00001940
WBGene00001940	ENSG00000278588	WBGene00001940
WBGene00001945	ENSG00000132475	WBGene00001945
WBGene00001945	ENSG00000163041	WBGene00001945
WBGene00001972	ENSG00000029993	WBGene00001972
WBGene00001972	ENSG00000164104	WBGene00001972
WBGene00001972	ENSG00000189403	WBGene00001972
WBGene00001974	ENSG00000149136	WBGene00001974
WBGene00001975	ENSG00000108064	WBGene00001975
WBGene00001976	ENSG00000149948	WBGene00001976
WBGene00001978	ENSG00000044115	WBGene00001978
WBGene00001978	ENSG00000066032	WBGene00001978
WBGene00001979	ENSG00000168036	WBGene00001979
WBGene00001993	ENSG00000158104	WBGene00001993
WBGene00001995	ENSG00000094916	WBGene00001995
WBGene00001995	ENSG00000108468	WBGene00001995
WBGene00001995	ENSG00000122565	WBGene00001995
WBGene00001996	ENSG00000094916	WBGene00001996
WBGene00001996	ENSG00000108468	WBGene00001996
WBGene00001996	ENSG00000122565	WBGene00001996
WBGene00001997	ENSG00000151164	WBGene00001997
WBGene00001999	ENSG00000135486	WBGene00001999
WBGene00002000	ENSG00000135316	WBGene00002000
WBGene00002001	ENSG00000170445	WBGene00002001
WBGene00002003	ENSG00000138604	WBGene00002003
WBGene00002007	ENSG00000044574	WBGene00002007
WBGene00002008	ENSG00000044574	WBGene00002008
WBGene00002010	ENSG00000113013	WBGene00002010
WBGene00002018	ENSG00000160202	WBGene00002018
WBGene00002018	ENSG00000276076	WBGene00002018
WBGene00002020	ENSG00000160202	WBGene00002020
WBGene00002020	ENSG00000276076	WBGene00002020
WBGene00002025	ENSG00000144381	WBGene00002025
WBGene00002028	ENSG00000070614	WBGene00002028
WBGene00002028	ENSG00000138653	WBGene00002028
WBGene00002028	ENSG00000164100	WBGene00002028
WBGene00002028	ENSG00000166507	WBGene00002028
WBGene00002029	ENSG00000267561	WBGene00002029
WBGene00002030	ENSG00000002587	WBGene00002030
WBGene00002030	ENSG00000249853	WBGene00002030
WBGene00002031	ENSG00000136720	WBGene00002031
WBGene00002035	ENSG00000142347	WBGene00002035
WBGene00002035	ENSG00000157483	WBGene00002035
WBGene00002036	ENSG00000128833	WBGene00002036
WBGene00002036	ENSG00000167306	WBGene00002036
WBGene00002036	ENSG00000197535	WBGene00002036
WBGene00002037	ENSG00000091536	WBGene00002037
WBGene00002038	ENSG00000176658	WBGene00002038
WBGene00002039	ENSG00000137474	WBGene00002039
WBGene00002040	ENSG00000066933	WBGene00002040
WBGene00002040	ENSG00000099331	WBGene00002040
WBGene00002041	ENSG00000196586	WBGene00002041
WBGene00002042	ENSG00000136273	WBGene00002042
WBGene00002043	ENSG00000090661	WBGene00002043
WBGene00002043	ENSG00000139624	WBGene00002043
WBGene00002043	ENSG00000143418	WBGene00002043
WBGene00002043	ENSG00000154227	WBGene00002043
WBGene00002043	ENSG00000172292	WBGene00002043
WBGene00002044	ENSG00000090661	WBGene00002044
WBGene00002044	ENSG00000139624	WBGene00002044
WBGene00002044	ENSG00000143418	WBGene00002044
WBGene00002044	ENSG00000154227	WBGene00002044
WBGene00002044	ENSG00000172292	WBGene00002044
WBGene00002045	ENSG00000145741	WBGene00002045
WBGene00002046	ENSG00000074201	WBGene00002046
WBGene00002047	ENSG00000167674	WBGene00002047
WBGene00002054	ENSG00000148798	WBGene00002054
WBGene00002054	ENSG00000175084	WBGene00002054
WBGene00002055	ENSG00000139648	WBGene00002055
WBGene00002055	ENSG00000167768	WBGene00002055
WBGene00002055	ENSG00000185069	WBGene00002055
WBGene00002055	ENSG00000186442	WBGene00002055
WBGene00002058	ENSG00000135443	WBGene00002058
WBGene00002058	ENSG00000170442	WBGene00002058
WBGene00002058	ENSG00000171346	WBGene00002058
WBGene00002061	ENSG00000151247	WBGene00002061
WBGene00002061	ENSG00000175766	WBGene00002061
WBGene00002062	ENSG00000135930	WBGene00002062
WBGene00002064	ENSG00000163577	WBGene00002064
WBGene00002064	ENSG00000253626	WBGene00002064
WBGene00002065	ENSG00000163577	WBGene00002065
WBGene00002065	ENSG00000253626	WBGene00002065
WBGene00002070	ENSG00000074695	WBGene00002070
WBGene00002071	ENSG00000114988	WBGene00002071
WBGene00002071	ENSG00000169223	WBGene00002071
WBGene00002074	ENSG00000102753	WBGene00002074
WBGene00002074	ENSG00000186432	WBGene00002074
WBGene00002075	ENSG00000108424	WBGene00002075
WBGene00002076	ENSG00000083312	WBGene00002076
WBGene00002076	ENSG00000105576	WBGene00002076
WBGene00002077	ENSG00000065150	WBGene00002077
WBGene00002078	ENSG00000082898	WBGene00002078
WBGene00002079	ENSG00000124207	WBGene00002079
WBGene00002080	ENSG00000184575	WBGene00002080
WBGene00002081	ENSG00000005884	WBGene00002081
WBGene00002081	ENSG00000091409	WBGene00002081
WBGene00002083	ENSG00000156976	WBGene00002083
WBGene00002083	ENSG00000161960	WBGene00002083
WBGene00002146	ENSG00000068383	WBGene00002146
WBGene00002147	ENSG00000178607	WBGene00002147
WBGene00002150	ENSG00000123700	WBGene00002150
WBGene00002150	ENSG00000168135	WBGene00002150
WBGene00002150	ENSG00000184185	WBGene00002150
WBGene00002150	ENSG00000260458	WBGene00002150
WBGene00002152	ENSG00000196305	WBGene00002152
WBGene00002153	ENSG00000067704	WBGene00002153
WBGene00002162	ENSG00000169021	WBGene00002162
WBGene00002169	ENSG00000153147	WBGene00002169
WBGene00002173	ENSG00000096433	WBGene00002173
WBGene00002173	ENSG00000150995	WBGene00002173
WBGene00002178	ENSG00000050748	WBGene00002178
WBGene00002178	ENSG00000109339	WBGene00002178
WBGene00002182	ENSG00000075945	WBGene00002182
WBGene00002183	ENSG00000075239	WBGene00002183
WBGene00002184	ENSG00000109466	WBGene00002184
WBGene00002184	ENSG00000146021	WBGene00002184
WBGene00002185	ENSG00000114648	WBGene00002185
WBGene00002189	ENSG00000072062	WBGene00002189
WBGene00002189	ENSG00000142875	WBGene00002189
WBGene00002190	ENSG00000108946	WBGene00002190
WBGene00002190	ENSG00000188191	WBGene00002190
WBGene00002191	ENSG00000070770	WBGene00002191
WBGene00002191	ENSG00000101266	WBGene00002191
WBGene00002191	ENSG00000254598	WBGene00002191
WBGene00002196	ENSG00000224774	WBGene00002196
WBGene00002201	ENSG00000135090	WBGene00002201
WBGene00002201	ENSG00000160551	WBGene00002201
WBGene00002202	ENSG00000113712	WBGene00002202
WBGene00002207	ENSG00000160584	WBGene00002207
WBGene00002215	ENSG00000174996	WBGene00002215
WBGene00002217	ENSG00000137177	WBGene00002217
WBGene00002217	ENSG00000197892	WBGene00002217
WBGene00002219	ENSG00000141200	WBGene00002219
WBGene00002223	ENSG00000116852	WBGene00002223
WBGene00002223	ENSG00000139116	WBGene00002223
WBGene00002225	ENSG00000233450	WBGene00002225
WBGene00002229	ENSG00000090889	WBGene00002229
WBGene00002229	ENSG00000226650	WBGene00002229
WBGene00002230	ENSG00000131437	WBGene00002230
WBGene00002232	ENSG00000140564	WBGene00002232
WBGene00002233	ENSG00000117013	WBGene00002233
WBGene00002235	ENSG00000053918	WBGene00002235
WBGene00002238	ENSG00000065427	WBGene00002238
WBGene00002239	ENSG00000141068	WBGene00002239
WBGene00002242	ENSG00000124134	WBGene00002242
WBGene00002242	ENSG00000156486	WBGene00002242
WBGene00002242	ENSG00000164794	WBGene00002242
WBGene00002242	ENSG00000170745	WBGene00002242
WBGene00002243	ENSG00000091129	WBGene00002243
WBGene00002243	ENSG00000163531	WBGene00002243
WBGene00002244	ENSG00000067048	WBGene00002244
WBGene00002244	ENSG00000215301	WBGene00002244
WBGene00002247	ENSG00000091136	WBGene00002247
WBGene00002247	ENSG00000172037	WBGene00002247
WBGene00002248	ENSG00000101680	WBGene00002248
WBGene00002248	ENSG00000196569	WBGene00002248
WBGene00002249	ENSG00000215440	WBGene00002249
WBGene00002257	ENSG00000170323	WBGene00002257
WBGene00002258	ENSG00000121769	WBGene00002258
WBGene00002258	ENSG00000147588	WBGene00002258
WBGene00002258	ENSG00000164434	WBGene00002258
WBGene00002258	ENSG00000205186	WBGene00002258
WBGene00002259	ENSG00000121769	WBGene00002259
WBGene00002259	ENSG00000147588	WBGene00002259
WBGene00002259	ENSG00000164434	WBGene00002259
WBGene00002259	ENSG00000205186	WBGene00002259
WBGene00002260	ENSG00000121769	WBGene00002260
WBGene00002260	ENSG00000147588	WBGene00002260
WBGene00002260	ENSG00000164434	WBGene00002260
WBGene00002260	ENSG00000205186	WBGene00002260
WBGene00002262	ENSG00000111716	WBGene00002262
WBGene00002262	ENSG00000134333	WBGene00002262
WBGene00002262	ENSG00000166796	WBGene00002262
WBGene00002264	ENSG00000168961	WBGene00002264
WBGene00002264	ENSG00000170298	WBGene00002264
WBGene00002264	ENSG00000171747	WBGene00002264
WBGene00002264	ENSG00000171916	WBGene00002264
WBGene00002265	ENSG00000100285	WBGene00002265
WBGene00002266	ENSG00000168961	WBGene00002266
WBGene00002266	ENSG00000170298	WBGene00002266
WBGene00002266	ENSG00000171747	WBGene00002266
WBGene00002266	ENSG00000171916	WBGene00002266
WBGene00002269	ENSG00000178934	WBGene00002269
WBGene00002280	ENSG00000188153	WBGene00002280
WBGene00002282	ENSG00000185245	WBGene00002282
WBGene00002297	ENSG00000114346	WBGene00002297
WBGene00002299	ENSG00000065361	WBGene00002299
WBGene00002299	ENSG00000141736	WBGene00002299
WBGene00002299	ENSG00000146648	WBGene00002299
WBGene00002299	ENSG00000178568	WBGene00002299
WBGene00002324	ENSG00000155868	WBGene00002324
WBGene00002335	ENSG00000133703	WBGene00002335
WBGene00002335	ENSG00000213281	WBGene00002335
WBGene00002335	ENSG00000276536	WBGene00002335
WBGene00002344	ENSG00000078967	WBGene00002344
WBGene00002344	ENSG00000109332	WBGene00002344
WBGene00002344	ENSG00000131508	WBGene00002344
WBGene00002363	ENSG00000104695	WBGene00002363
WBGene00002363	ENSG00000113575	WBGene00002363
WBGene00002497	ENSG00000083444	WBGene00002497
WBGene00002497	ENSG00000106397	WBGene00002497
WBGene00002497	ENSG00000152952	WBGene00002497
WBGene00002583	ENSG00000198793	WBGene00002583
WBGene00002637	ENSG00000111642	WBGene00002637
WBGene00002637	ENSG00000170004	WBGene00002637
WBGene00002694	ENSG00000067900	WBGene00002694
WBGene00002694	ENSG00000134318	WBGene00002694
WBGene00002696	ENSG00000101882	WBGene00002696
WBGene00002717	ENSG00000049618	WBGene00002717
WBGene00002717	ENSG00000117713	WBGene00002717
WBGene00002845	ENSG00000125107	WBGene00002845
WBGene00002850	ENSG00000148843	WBGene00002850
WBGene00002855	ENSG00000171503	WBGene00002855
WBGene00002879	ENSG00000004455	WBGene00002879
WBGene00002891	ENSG00000103160	WBGene00002891
WBGene00002891	ENSG00000149084	WBGene00002891
WBGene00002915	ENSG00000168477	WBGene00002915
WBGene00002915	ENSG00000206258	WBGene00002915
WBGene00002915	ENSG00000231608	WBGene00002915
WBGene00002915	ENSG00000233323	WBGene00002915
WBGene00002957	ENSG00000163510	WBGene00002957
WBGene00002976	ENSG00000123838	WBGene00002976
WBGene00002976	ENSG00000197721	WBGene00002976
WBGene00002978	ENSG00000140416	WBGene00002978
WBGene00002978	ENSG00000143549	WBGene00002978
WBGene00002980	ENSG00000170296	WBGene00002980
WBGene00002981	ENSG00000101460	WBGene00002981
WBGene00002981	ENSG00000140941	WBGene00002981
WBGene00002981	ENSG00000258102	WBGene00002981
WBGene00002982	ENSG00000145782	WBGene00002982
WBGene00002985	ENSG00000105486	WBGene00002985
WBGene00002996	ENSG00000104863	WBGene00002996
WBGene00002996	ENSG00000111052	WBGene00002996
WBGene00002996	ENSG00000148943	WBGene00002996
WBGene00002998	ENSG00000183814	WBGene00002998
WBGene00003000	ENSG00000274577	WBGene00003000
WBGene00003001	ENSG00000206312	WBGene00003001
WBGene00003001	ENSG00000223355	WBGene00003001
WBGene00003001	ENSG00000232339	WBGene00003001
WBGene00003001	ENSG00000234876	WBGene00003001
WBGene00003001	ENSG00000235396	WBGene00003001
WBGene00003007	ENSG00000163785	WBGene00003007
WBGene00003009	ENSG00000072803	WBGene00003009
WBGene00003009	ENSG00000166167	WBGene00003009
WBGene00003020	ENSG00000080839	WBGene00003020
WBGene00003020	ENSG00000103479	WBGene00003020
WBGene00003026	ENSG00000206557	WBGene00003026
WBGene00003030	ENSG00000157764	WBGene00003030
WBGene00003036	ENSG00000102054	WBGene00003036
WBGene00003036	ENSG00000162521	WBGene00003036
WBGene00003047	ENSG00000007168	WBGene00003047
WBGene00003048	ENSG00000087095	WBGene00003048
WBGene00003059	ENSG00000129460	WBGene00003059
WBGene00003061	ENSG00000164258	WBGene00003061
WBGene00003063	ENSG00000100029	WBGene00003063
WBGene00003064	ENSG00000169599	WBGene00003064
WBGene00003071	ENSG00000081479	WBGene00003071
WBGene00003074	ENSG00000011376	WBGene00003074
WBGene00003076	ENSG00000175324	WBGene00003076
WBGene00003077	ENSG00000170860	WBGene00003077
WBGene00003078	ENSG00000130520	WBGene00003078
WBGene00003079	ENSG00000106355	WBGene00003079
WBGene00003080	ENSG00000164167	WBGene00003080
WBGene00003081	ENSG00000130332	WBGene00003081
WBGene00003082	ENSG00000128534	WBGene00003082
WBGene00003084	ENSG00000159733	WBGene00003084
WBGene00003085	ENSG00000060339	WBGene00003085
WBGene00003086	ENSG00000173548	WBGene00003086
WBGene00003086	ENSG00000178996	WBGene00003086
WBGene00003112	ENSG00000180660	WBGene00003112
WBGene00003112	ENSG00000181541	WBGene00003112
WBGene00003119	ENSG00000143748	WBGene00003119
WBGene00003123	ENSG00000111196	WBGene00003123
WBGene00003123	ENSG00000162385	WBGene00003123
WBGene00003129	ENSG00000164024	WBGene00003129
WBGene00003130	ENSG00000111142	WBGene00003130
WBGene00003132	ENSG00000196510	WBGene00003132
WBGene00003136	ENSG00000129933	WBGene00003136
WBGene00003142	ENSG00000136940	WBGene00003142
WBGene00003148	ENSG00000107223	WBGene00003148
WBGene00003154	ENSG00000073111	WBGene00003154
WBGene00003155	ENSG00000112118	WBGene00003155
WBGene00003156	ENSG00000104738	WBGene00003156
WBGene00003157	ENSG00000100297	WBGene00003157
WBGene00003158	ENSG00000076003	WBGene00003158
WBGene00003159	ENSG00000166508	WBGene00003159
WBGene00003161	ENSG00000164109	WBGene00003161
WBGene00003162	ENSG00000146701	WBGene00003162
WBGene00003164	ENSG00000133997	WBGene00003164
WBGene00003171	ENSG00000137267	WBGene00003171
WBGene00003171	ENSG00000137285	WBGene00003171
WBGene00003171	ENSG00000188229	WBGene00003171
WBGene00003175	ENSG00000075886	WBGene00003175
WBGene00003175	ENSG00000123416	WBGene00003175
WBGene00003175	ENSG00000167552	WBGene00003175
WBGene00003175	ENSG00000167553	WBGene00003175
WBGene00003177	ENSG00000132004	WBGene00003177
WBGene00003183	ENSG00000186625	WBGene00003183
WBGene00003185	ENSG00000076984	WBGene00003185
WBGene00003186	ENSG00000126934	WBGene00003186
WBGene00003186	ENSG00000169032	WBGene00003186
WBGene00003196	ENSG00000058272	WBGene00003196
WBGene00003196	ENSG00000077157	WBGene00003196
WBGene00003214	ENSG00000176974	WBGene00003214
WBGene00003224	ENSG00000074266	WBGene00003224
WBGene00003225	ENSG00000143252	WBGene00003225
WBGene00003232	ENSG00000164082	WBGene00003232
WBGene00003232	ENSG00000198822	WBGene00003232
WBGene00003233	ENSG00000152822	WBGene00003233
WBGene00003233	ENSG00000168959	WBGene00003233
WBGene00003234	ENSG00000276701	WBGene00003234
WBGene00003235	ENSG00000275758	WBGene00003235
WBGene00003239	ENSG00000177105	WBGene00003239
WBGene00003246	ENSG00000116729	WBGene00003246
WBGene00003247	ENSG00000071054	WBGene00003247
WBGene00003247	ENSG00000141503	WBGene00003247
WBGene00003247	ENSG00000154310	WBGene00003247
WBGene00003253	ENSG00000033100	WBGene00003253
WBGene00003253	ENSG00000123989	WBGene00003253
WBGene00003254	ENSG00000198018	WBGene00003254
WBGene00003367	ENSG00000136824	WBGene00003367
WBGene00003368	ENSG00000065559	WBGene00003368
WBGene00003369	ENSG00000106631	WBGene00003369
WBGene00003369	ENSG00000215375	WBGene00003369
WBGene00003370	ENSG00000106631	WBGene00003370
WBGene00003370	ENSG00000215375	WBGene00003370
WBGene00003371	ENSG00000092841	WBGene00003371
WBGene00003371	ENSG00000160808	WBGene00003371
WBGene00003371	ENSG00000168530	WBGene00003371
WBGene00003371	ENSG00000196465	WBGene00003371
WBGene00003371	ENSG00000198336	WBGene00003371
WBGene00003372	ENSG00000101335	WBGene00003372
WBGene00003372	ENSG00000101608	WBGene00003372
WBGene00003372	ENSG00000118680	WBGene00003372
WBGene00003373	ENSG00000076242	WBGene00003373
WBGene00003375	ENSG00000129170	WBGene00003375
WBGene00003375	ENSG00000159176	WBGene00003375
WBGene00003376	ENSG00000112837	WBGene00003376
WBGene00003378	ENSG00000009950	WBGene00003378
WBGene00003378	ENSG00000281178	WBGene00003378
WBGene00003387	ENSG00000108576	WBGene00003387
WBGene00003389	ENSG00000140829	WBGene00003389
WBGene00003390	ENSG00000131876	WBGene00003390
WBGene00003393	ENSG00000067596	WBGene00003393
WBGene00003394	ENSG00000102312	WBGene00003394
WBGene00003397	ENSG00000155760	WBGene00003397
WBGene00003397	ENSG00000157240	WBGene00003397
WBGene00003397	ENSG00000180340	WBGene00003397
WBGene00003400	ENSG00000196730	WBGene00003400
WBGene00003401	ENSG00000100030	WBGene00003401
WBGene00003404	ENSG00000107186	WBGene00003404
WBGene00003405	ENSG00000020922	WBGene00003405
WBGene00003406	ENSG00000185787	WBGene00003406
WBGene00003407	ENSG00000278183	WBGene00003407
WBGene00003411	ENSG00000114770	WBGene00003411
WBGene00003412	ENSG00000125257	WBGene00003412
WBGene00003415	ENSG00000166986	WBGene00003415
WBGene00003417	ENSG00000113456	WBGene00003417
WBGene00003418	ENSG00000095002	WBGene00003418
WBGene00003422	ENSG00000116062	WBGene00003422
WBGene00003475	ENSG00000063601	WBGene00003475
WBGene00003475	ENSG00000087053	WBGene00003475
WBGene00003475	ENSG00000171100	WBGene00003475
WBGene00003477	ENSG00000133812	WBGene00003477
WBGene00003478	ENSG00000003987	WBGene00003478
WBGene00003478	ENSG00000139505	WBGene00003478
WBGene00003479	ENSG00000104643	WBGene00003479
WBGene00003480	ENSG00000019549	WBGene00003480
WBGene00003495	ENSG00000105048	WBGene00003495
WBGene00003495	ENSG00000118194	WBGene00003495
WBGene00003495	ENSG00000130595	WBGene00003495
WBGene00003504	ENSG00000187609	WBGene00003504
WBGene00003509	ENSG00000125952	WBGene00003509
WBGene00003515	ENSG00000092054	WBGene00003515
WBGene00003515	ENSG00000109061	WBGene00003515
WBGene00003515	ENSG00000109063	WBGene00003515
WBGene00003515	ENSG00000125414	WBGene00003515
WBGene00003515	ENSG00000133020	WBGene00003515
WBGene00003515	ENSG00000197616	WBGene00003515
WBGene00003515	ENSG00000264424	WBGene00003515
WBGene00003517	ENSG00000007216	WBGene00003517
WBGene00003517	ENSG00000158296	WBGene00003517
WBGene00003518	ENSG00000007216	WBGene00003518
WBGene00003518	ENSG00000158296	WBGene00003518
WBGene00003519	ENSG00000007216	WBGene00003519
WBGene00003519	ENSG00000158296	WBGene00003519
WBGene00003555	ENSG00000038295	WBGene00003555
WBGene00003558	ENSG00000102452	WBGene00003558
WBGene00003561	ENSG00000015520	WBGene00003561
WBGene00003561	ENSG00000141458	WBGene00003561
WBGene00003562	ENSG00000015520	WBGene00003562
WBGene00003562	ENSG00000141458	WBGene00003562
WBGene00003563	ENSG00000107130	WBGene00003563
WBGene00003566	ENSG00000100678	WBGene00003566
WBGene00003566	ENSG00000118160	WBGene00003566
WBGene00003566	ENSG00000183023	WBGene00003566
WBGene00003567	ENSG00000100678	WBGene00003567
WBGene00003567	ENSG00000118160	WBGene00003567
WBGene00003567	ENSG00000183023	WBGene00003567
WBGene00003569	ENSG00000155886	WBGene00003569
WBGene00003571	ENSG00000089060	WBGene00003571
WBGene00003576	ENSG00000080986	WBGene00003576
WBGene00003579	ENSG00000165609	WBGene00003579
WBGene00003580	ENSG00000167799	WBGene00003580
WBGene00003581	ENSG00000164978	WBGene00003581
WBGene00003583	ENSG00000170502	WBGene00003583
WBGene00003584	ENSG00000213965	WBGene00003584
WBGene00003585	ENSG00000140876	WBGene00003585
WBGene00003586	ENSG00000112874	WBGene00003586
WBGene00003587	ENSG00000129559	WBGene00003587
WBGene00003587	ENSG00000255526	WBGene00003587
WBGene00003589	ENSG00000122359	WBGene00003589
WBGene00003589	ENSG00000138279	WBGene00003589
WBGene00003589	ENSG00000196975	WBGene00003589
WBGene00003594	ENSG00000158793	WBGene00003594
WBGene00003596	ENSG00000134697	WBGene00003596
WBGene00003621	ENSG00000136931	WBGene00003621
WBGene00003639	ENSG00000101076	WBGene00003639
WBGene00003639	ENSG00000164749	WBGene00003639
WBGene00003654	ENSG00000101076	WBGene00003654
WBGene00003654	ENSG00000164749	WBGene00003654
WBGene00003659	ENSG00000101076	WBGene00003659
WBGene00003659	ENSG00000164749	WBGene00003659
WBGene00003681	ENSG00000148200	WBGene00003681
WBGene00003704	ENSG00000025434	WBGene00003704
WBGene00003729	ENSG00000090020	WBGene00003729
WBGene00003731	ENSG00000090020	WBGene00003731
WBGene00003733	ENSG00000065923	WBGene00003733
WBGene00003733	ENSG00000181804	WBGene00003733
WBGene00003733	ENSG00000198689	WBGene00003733
WBGene00003734	ENSG00000115616	WBGene00003734
WBGene00003735	ENSG00000197818	WBGene00003735
WBGene00003736	ENSG00000115616	WBGene00003736
WBGene00003738	ENSG00000116962	WBGene00003738
WBGene00003769	ENSG00000186977	WBGene00003769
WBGene00003769	ENSG00000206102	WBGene00003769
WBGene00003772	ENSG00000155052	WBGene00003772
WBGene00003774	ENSG00000176884	WBGene00003774
WBGene00003775	ENSG00000161509	WBGene00003775
WBGene00003776	ENSG00000100345	WBGene00003776
WBGene00003776	ENSG00000133026	WBGene00003776
WBGene00003778	ENSG00000112992	WBGene00003778
WBGene00003787	ENSG00000138750	WBGene00003787
WBGene00003788	ENSG00000125450	WBGene00003788
WBGene00003789	ENSG00000155561	WBGene00003789
WBGene00003790	ENSG00000139496	WBGene00003790
WBGene00003793	ENSG00000196313	WBGene00003793
WBGene00003793	ENSG00000272391	WBGene00003793
WBGene00003794	ENSG00000113569	WBGene00003794
WBGene00003796	ENSG00000110713	WBGene00003796
WBGene00003798	ENSG00000132182	WBGene00003798
WBGene00003803	ENSG00000101146	WBGene00003803
WBGene00003804	ENSG00000085415	WBGene00003804
WBGene00003806	ENSG00000157020	WBGene00003806
WBGene00003807	ENSG00000164128	WBGene00003807
WBGene00003815	ENSG00000134440	WBGene00003815
WBGene00003816	ENSG00000070669	WBGene00003816
WBGene00003818	ENSG00000276262	WBGene00003818
WBGene00003821	ENSG00000130119	WBGene00003821
WBGene00003822	ENSG00000180815	WBGene00003822
WBGene00003822	ENSG00000197442	WBGene00003822
WBGene00003826	ENSG00000088038	WBGene00003826
WBGene00003826	ENSG00000277600	WBGene00003826
WBGene00003828	ENSG00000105612	WBGene00003828
WBGene00003828	ENSG00000137976	WBGene00003828
WBGene00003829	ENSG00000090273	WBGene00003829
WBGene00003831	ENSG00000167792	WBGene00003831
WBGene00003834	ENSG00000162231	WBGene00003834
WBGene00003834	ENSG00000269437	WBGene00003834
WBGene00003836	ENSG00000101888	WBGene00003836
WBGene00003836	ENSG00000132661	WBGene00003836
WBGene00003838	ENSG00000165125	WBGene00003838
WBGene00003838	ENSG00000196689	WBGene00003838
WBGene00003838	ENSG00000274348	WBGene00003838
WBGene00003838	ENSG00000276971	WBGene00003838
WBGene00003840	ENSG00000167723	WBGene00003840
WBGene00003840	ENSG00000187688	WBGene00003840
WBGene00003841	ENSG00000165125	WBGene00003841
WBGene00003841	ENSG00000196689	WBGene00003841
WBGene00003841	ENSG00000274348	WBGene00003841
WBGene00003841	ENSG00000276971	WBGene00003841
WBGene00003843	ENSG00000197891	WBGene00003843
WBGene00003844	ENSG00000115758	WBGene00003844
WBGene00003851	ENSG00000157181	WBGene00003851
WBGene00003858	ENSG00000147162	WBGene00003858
WBGene00003870	ENSG00000136816	WBGene00003870
WBGene00003870	ENSG00000136827	WBGene00003870
WBGene00003877	ENSG00000163406	WBGene00003877
WBGene00003883	ENSG00000138002	WBGene00003883
WBGene00003884	ENSG00000117245	WBGene00003884
WBGene00003885	ENSG00000032742	WBGene00003885
WBGene00003886	ENSG00000101052	WBGene00003886
WBGene00003892	ENSG00000138686	WBGene00003892
WBGene00003893	ENSG00000113140	WBGene00003893
WBGene00003898	ENSG00000151148	WBGene00003898
WBGene00003901	ENSG00000105568	WBGene00003901
WBGene00003901	ENSG00000137713	WBGene00003901
WBGene00003905	ENSG00000083097	WBGene00003905
WBGene00003906	ENSG00000146070	WBGene00003906
WBGene00003906	ENSG00000158006	WBGene00003906
WBGene00003907	ENSG00000146070	WBGene00003907
WBGene00003907	ENSG00000158006	WBGene00003907
WBGene00003911	ENSG00000077264	WBGene00003911
WBGene00003911	ENSG00000149269	WBGene00003911
WBGene00003911	ENSG00000180370	WBGene00003911
WBGene00003914	ENSG00000141279	WBGene00003914
WBGene00003916	ENSG00000075413	WBGene00003916
WBGene00003920	ENSG00000164924	WBGene00003920
WBGene00003920	ENSG00000166913	WBGene00003920
WBGene00003921	ENSG00000102981	WBGene00003921
WBGene00003921	ENSG00000124171	WBGene00003921
WBGene00003921	ENSG00000178184	WBGene00003921
WBGene00003922	ENSG00000100902	WBGene00003922
WBGene00003923	ENSG00000256646	WBGene00003923
WBGene00003924	ENSG00000041357	WBGene00003924
WBGene00003925	ENSG00000101182	WBGene00003925
WBGene00003926	ENSG00000143106	WBGene00003926
WBGene00003927	ENSG00000129084	WBGene00003927
WBGene00003928	ENSG00000100567	WBGene00003928
WBGene00003929	ENSG00000077943	WBGene00003929
WBGene00003929	ENSG00000138448	WBGene00003929
WBGene00003929	ENSG00000161638	WBGene00003929
WBGene00003932	ENSG00000188677	WBGene00003932
WBGene00003932	ENSG00000197702	WBGene00003932
WBGene00003941	ENSG00000166869	WBGene00003941
WBGene00003941	ENSG00000187446	WBGene00003941
WBGene00003947	ENSG00000142507	WBGene00003947
WBGene00003947	ENSG00000243594	WBGene00003947
WBGene00003947	ENSG00000243958	WBGene00003947
WBGene00003948	ENSG00000136930	WBGene00003948
WBGene00003949	ENSG00000275903	WBGene00003949
WBGene00003950	ENSG00000126067	WBGene00003950
WBGene00003951	ENSG00000100804	WBGene00003951
WBGene00003951	ENSG00000231631	WBGene00003951
WBGene00003952	ENSG00000008018	WBGene00003952
WBGene00003953	ENSG00000159377	WBGene00003953
WBGene00003954	ENSG00000120265	WBGene00003954
WBGene00003955	ENSG00000132646	WBGene00003955
WBGene00003956	ENSG00000137509	WBGene00003956
WBGene00003961	ENSG00000059758	WBGene00003961
WBGene00003961	ENSG00000102225	WBGene00003961
WBGene00003963	ENSG00000185624	WBGene00003963
WBGene00003964	ENSG00000167004	WBGene00003964
WBGene00003965	ENSG00000140992	WBGene00003965
WBGene00003966	ENSG00000156973	WBGene00003966
WBGene00003967	ENSG00000185345	WBGene00003967
WBGene00003969	ENSG00000086717	WBGene00003969
WBGene00003969	ENSG00000156194	WBGene00003969
WBGene00003970	ENSG00000172071	WBGene00003970
WBGene00003975	ENSG00000205155	WBGene00003975
WBGene00003980	ENSG00000140575	WBGene00003980
WBGene00003980	ENSG00000145703	WBGene00003980
WBGene00003980	ENSG00000183856	WBGene00003980
WBGene00003982	ENSG00000133313	WBGene00003982
WBGene00003996	ENSG00000005471	WBGene00003996
WBGene00004014	ENSG00000167085	WBGene00004014
WBGene00004015	ENSG00000215021	WBGene00004015
WBGene00004016	ENSG00000100410	WBGene00004016
WBGene00004020	ENSG00000014257	WBGene00004020
WBGene00004025	ENSG00000072682	WBGene00004025
WBGene00004025	ENSG00000122884	WBGene00004025
WBGene00004031	ENSG00000157212	WBGene00004031
WBGene00004033	ENSG00000154229	WBGene00004033
WBGene00004033	ENSG00000166501	WBGene00004033
WBGene00004034	ENSG00000067606	WBGene00004034
WBGene00004034	ENSG00000163558	WBGene00004034
WBGene00004035	ENSG00000107593	WBGene00004035
WBGene00004035	ENSG00000118762	WBGene00004035
WBGene00004036	ENSG00000138193	WBGene00004036
WBGene00004039	ENSG00000161714	WBGene00004039
WBGene00004040	ENSG00000075651	WBGene00004040
WBGene00004042	ENSG00000166851	WBGene00004042
WBGene00004043	ENSG00000166851	WBGene00004043
WBGene00004045	ENSG00000115896	WBGene00004045
WBGene00004045	ENSG00000154822	WBGene00004045
WBGene00004046	ENSG00000146676	WBGene00004046
WBGene00004047	ENSG00000076356	WBGene00004047
WBGene00004047	ENSG00000114554	WBGene00004047
WBGene00004047	ENSG00000130827	WBGene00004047
WBGene00004047	ENSG00000221866	WBGene00004047
WBGene00004049	ENSG00000143799	WBGene00004049
WBGene00004050	ENSG00000129484	WBGene00004050
WBGene00004059	ENSG00000117528	WBGene00004059
WBGene00004061	ENSG00000101986	WBGene00004061
WBGene00004061	ENSG00000173208	WBGene00004061
WBGene00004063	ENSG00000017260	WBGene00004063
WBGene00004063	ENSG00000064270	WBGene00004063
WBGene00004064	ENSG00000122512	WBGene00004064
WBGene00004075	ENSG00000278760	WBGene00004075
WBGene00004076	ENSG00000076555	WBGene00004076
WBGene00004076	ENSG00000275176	WBGene00004076
WBGene00004085	ENSG00000149923	WBGene00004085
WBGene00004087	ENSG00000107242	WBGene00004087
WBGene00004087	ENSG00000143398	WBGene00004087
WBGene00004088	ENSG00000150867	WBGene00004088
WBGene00004089	ENSG00000115020	WBGene00004089
WBGene00004090	ENSG00000070785	WBGene00004090
WBGene00004091	ENSG00000138801	WBGene00004091
WBGene00004091	ENSG00000198682	WBGene00004091
WBGene00004092	ENSG00000131238	WBGene00004092
WBGene00004098	ENSG00000188155	WBGene00004098
WBGene00004098	ENSG00000215454	WBGene00004098
WBGene00004098	ENSG00000221837	WBGene00004098
WBGene00004098	ENSG00000241123	WBGene00004098
WBGene00004098	ENSG00000243489	WBGene00004098
WBGene00004099	ENSG00000240542	WBGene00004099
WBGene00004101	ENSG00000185359	WBGene00004101
WBGene00004107	ENSG00000281191	WBGene00004107
WBGene00004109	ENSG00000115145	WBGene00004109
WBGene00004109	ENSG00000136738	WBGene00004109
WBGene00004117	ENSG00000127511	WBGene00004117
WBGene00004121	ENSG00000118200	WBGene00004121
WBGene00004131	ENSG00000158246	WBGene00004131
WBGene00004131	ENSG00000174016	WBGene00004131
WBGene00004131	ENSG00000183508	WBGene00004131
WBGene00004134	ENSG00000166268	WBGene00004134
WBGene00004136	ENSG00000165417	WBGene00004136
WBGene00004139	ENSG00000240542	WBGene00004139
WBGene00004140	ENSG00000214655	WBGene00004140
WBGene00004151	ENSG00000125821	WBGene00004151
WBGene00004153	ENSG00000205445	WBGene00004153
WBGene00004153	ENSG00000212935	WBGene00004153
WBGene00004159	ENSG00000188155	WBGene00004159
WBGene00004159	ENSG00000215454	WBGene00004159
WBGene00004159	ENSG00000221837	WBGene00004159
WBGene00004159	ENSG00000241123	WBGene00004159
WBGene00004159	ENSG00000243489	WBGene00004159
WBGene00004160	ENSG00000188155	WBGene00004160
WBGene00004160	ENSG00000215454	WBGene00004160
WBGene00004160	ENSG00000221837	WBGene00004160
WBGene00004160	ENSG00000241123	WBGene00004160
WBGene00004160	ENSG00000243489	WBGene00004160
WBGene00004161	ENSG00000128849	WBGene00004161
WBGene00004170	ENSG00000215455	WBGene00004170
WBGene00004171	ENSG00000215455	WBGene00004171
WBGene00004178	ENSG00000184571	WBGene00004178
WBGene00004178	ENSG00000275051	WBGene00004178
WBGene00004180	ENSG00000198056	WBGene00004180
WBGene00004181	ENSG00000146143	WBGene00004181
WBGene00004184	ENSG00000112245	WBGene00004184
WBGene00004184	ENSG00000184007	WBGene00004184
WBGene00004184	ENSG00000275575	WBGene00004184
WBGene00004187	ENSG00000274442	WBGene00004187
WBGene00004188	ENSG00000099995	WBGene00004188
WBGene00004190	ENSG00000162396	WBGene00004190
WBGene00004192	ENSG00000164751	WBGene00004192
WBGene00004194	ENSG00000139197	WBGene00004194
WBGene00004196	ENSG00000104883	WBGene00004196
WBGene00004197	ENSG00000108733	WBGene00004197
WBGene00004198	ENSG00000162928	WBGene00004198
WBGene00004201	ENSG00000162735	WBGene00004201
WBGene00004204	ENSG00000080503	WBGene00004204
WBGene00004204	ENSG00000127616	WBGene00004204
WBGene00004205	ENSG00000070495	WBGene00004205
WBGene00004206	ENSG00000157593	WBGene00004206
WBGene00004207	ENSG00000117569	WBGene00004207
WBGene00004208	ENSG00000185920	WBGene00004208
WBGene00004212	ENSG00000112419	WBGene00004212
WBGene00004213	ENSG00000088179	WBGene00004213
WBGene00004214	ENSG00000111679	WBGene00004214
WBGene00004214	ENSG00000179295	WBGene00004214
WBGene00004215	ENSG00000153707	WBGene00004215
WBGene00004216	ENSG00000276595	WBGene00004216
WBGene00004217	ENSG00000276595	WBGene00004217
WBGene00004224	ENSG00000276595	WBGene00004224
WBGene00004248	ENSG00000177192	WBGene00004248
WBGene00004254	ENSG00000109756	WBGene00004254
WBGene00004254	ENSG00000158987	WBGene00004254
WBGene00004254	ENSG00000273217	WBGene00004254
WBGene00004255	ENSG00000079337	WBGene00004255
WBGene00004255	ENSG00000091428	WBGene00004255
WBGene00004256	ENSG00000130508	WBGene00004256
WBGene00004257	ENSG00000130508	WBGene00004257
WBGene00004265	ENSG00000188039	WBGene00004265
WBGene00004266	ENSG00000138069	WBGene00004266
WBGene00004267	ENSG00000105649	WBGene00004267
WBGene00004267	ENSG00000152932	WBGene00004267
WBGene00004268	ENSG00000144566	WBGene00004268
WBGene00004270	ENSG00000154917	WBGene00004270
WBGene00004270	ENSG00000175582	WBGene00004270
WBGene00004271	ENSG00000075785	WBGene00004271
WBGene00004272	ENSG00000167461	WBGene00004272
WBGene00004273	ENSG00000084733	WBGene00004273
WBGene00004274	ENSG00000103769	WBGene00004274
WBGene00004274	ENSG00000185236	WBGene00004274
WBGene00004276	ENSG00000119396	WBGene00004276
WBGene00004277	ENSG00000099246	WBGene00004277
WBGene00004278	ENSG00000172780	WBGene00004278
WBGene00004279	ENSG00000080371	WBGene00004279
WBGene00004281	ENSG00000157869	WBGene00004281
WBGene00004282	ENSG00000137502	WBGene00004282
WBGene00004284	ENSG00000111737	WBGene00004284
WBGene00004285	ENSG00000167964	WBGene00004285
WBGene00004286	ENSG00000155961	WBGene00004286
WBGene00004286	ENSG00000179331	WBGene00004286
WBGene00004296	ENSG00000113522	WBGene00004296
WBGene00004297	ENSG00000051180	WBGene00004297
WBGene00004298	ENSG00000085999	WBGene00004298
WBGene00004302	ENSG00000132341	WBGene00004302
WBGene00004304	ENSG00000180198	WBGene00004304
WBGene00004305	ENSG00000102898	WBGene00004305
WBGene00004307	ENSG00000116473	WBGene00004307
WBGene00004307	ENSG00000127314	WBGene00004307
WBGene00004308	ENSG00000123728	WBGene00004308
WBGene00004308	ENSG00000125249	WBGene00004308
WBGene00004308	ENSG00000181467	WBGene00004308
WBGene00004310	ENSG00000126458	WBGene00004310
WBGene00004310	ENSG00000133818	WBGene00004310
WBGene00004311	ENSG00000158186	WBGene00004311
WBGene00004313	ENSG00000104093	WBGene00004313
WBGene00004313	ENSG00000172869	WBGene00004313
WBGene00004314	ENSG00000091157	WBGene00004314
WBGene00004315	ENSG00000122965	WBGene00004315
WBGene00004316	ENSG00000089169	WBGene00004316
WBGene00004317	ENSG00000115839	WBGene00004317
WBGene00004318	ENSG00000118873	WBGene00004318
WBGene00004320	ENSG00000100387	WBGene00004320
WBGene00004321	ENSG00000117602	WBGene00004321
WBGene00004321	ENSG00000159200	WBGene00004321
WBGene00004321	ENSG00000172348	WBGene00004321
WBGene00004336	ENSG00000273873	WBGene00004336
WBGene00004336	ENSG00000274803	WBGene00004336
WBGene00004338	ENSG00000049541	WBGene00004338
WBGene00004339	ENSG00000133119	WBGene00004339
WBGene00004341	ENSG00000144744	WBGene00004341
WBGene00004350	ENSG00000116741	WBGene00004350
WBGene00004355	ENSG00000135829	WBGene00004355
WBGene00004356	ENSG00000111348	WBGene00004356
WBGene00004356	ENSG00000141522	WBGene00004356
WBGene00004357	ENSG00000067560	WBGene00004357
WBGene00004357	ENSG00000155366	WBGene00004357
WBGene00004358	ENSG00000112077	WBGene00004358
WBGene00004359	ENSG00000132677	WBGene00004359
WBGene00004359	ENSG00000140519	WBGene00004359
WBGene00004364	ENSG00000092531	WBGene00004364
WBGene00004364	ENSG00000132639	WBGene00004364
WBGene00004367	ENSG00000111785	WBGene00004367
WBGene00004367	ENSG00000177963	WBGene00004367
WBGene00004368	ENSG00000163596	WBGene00004368
WBGene00004371	ENSG00000069188	WBGene00004371
WBGene00004371	ENSG00000146555	WBGene00004371
WBGene00004372	ENSG00000175161	WBGene00004372
WBGene00004373	ENSG00000013016	WBGene00004373
WBGene00004373	ENSG00000110047	WBGene00004373
WBGene00004378	ENSG00000138246	WBGene00004378
WBGene00004382	ENSG00000171865	WBGene00004382
WBGene00004383	ENSG00000104889	WBGene00004383
WBGene00004385	ENSG00000077312	WBGene00004385
WBGene00004385	ENSG00000125870	WBGene00004385
WBGene00004386	ENSG00000077312	WBGene00004386
WBGene00004386	ENSG00000125870	WBGene00004386
WBGene00004387	ENSG00000265241	WBGene00004387
WBGene00004388	ENSG00000205937	WBGene00004388
WBGene00004389	ENSG00000179950	WBGene00004389
WBGene00004391	ENSG00000167325	WBGene00004391
WBGene00004392	ENSG00000171848	WBGene00004392
WBGene00004400	ENSG00000141314	WBGene00004400
WBGene00004405	ENSG00000116747	WBGene00004405
WBGene00004408	ENSG00000089157	WBGene00004408
WBGene00004409	ENSG00000137818	WBGene00004409
WBGene00004411	ENSG00000148606	WBGene00004411
WBGene00004412	ENSG00000198755	WBGene00004412
WBGene00004413	ENSG00000161016	WBGene00004413
WBGene00004414	ENSG00000100316	WBGene00004414
WBGene00004415	ENSG00000174444	WBGene00004415
WBGene00004416	ENSG00000122406	WBGene00004416
WBGene00004418	ENSG00000147604	WBGene00004418
WBGene00004419	ENSG00000280858	WBGene00004419
WBGene00004420	ENSG00000273673	WBGene00004420
WBGene00004421	ENSG00000147403	WBGene00004421
WBGene00004421	ENSG00000165496	WBGene00004421
WBGene00004422	ENSG00000142676	WBGene00004422
WBGene00004423	ENSG00000142676	WBGene00004423
WBGene00004424	ENSG00000197958	WBGene00004424
WBGene00004425	ENSG00000167526	WBGene00004425
WBGene00004426	ENSG00000188846	WBGene00004426
WBGene00004427	ENSG00000174748	WBGene00004427
WBGene00004429	ENSG00000215472	WBGene00004429
WBGene00004429	ENSG00000265681	WBGene00004429
WBGene00004430	ENSG00000063177	WBGene00004430
WBGene00004431	ENSG00000108298	WBGene00004431
WBGene00004432	ENSG00000105640	WBGene00004432
WBGene00004433	ENSG00000122026	WBGene00004433
WBGene00004434	ENSG00000116251	WBGene00004434
WBGene00004434	ENSG00000163584	WBGene00004434
WBGene00004435	ENSG00000125691	WBGene00004435
WBGene00004436	ENSG00000114391	WBGene00004436
WBGene00004437	ENSG00000137876	WBGene00004437
WBGene00004438	ENSG00000198242	WBGene00004438
WBGene00004439	ENSG00000198242	WBGene00004439
WBGene00004440	ENSG00000037241	WBGene00004440
WBGene00004440	ENSG00000161970	WBGene00004440
WBGene00004441	ENSG00000131469	WBGene00004441
WBGene00004442	ENSG00000108107	WBGene00004442
WBGene00004444	ENSG00000156482	WBGene00004444
WBGene00004445	ENSG00000071082	WBGene00004445
WBGene00004446	ENSG00000144713	WBGene00004446
WBGene00004447	ENSG00000182899	WBGene00004447
WBGene00004448	ENSG00000109475	WBGene00004448
WBGene00004449	ENSG00000136942	WBGene00004449
WBGene00004450	ENSG00000130255	WBGene00004450
WBGene00004451	ENSG00000145592	WBGene00004451
WBGene00004452	ENSG00000172809	WBGene00004452
WBGene00004453	ENSG00000198918	WBGene00004453
WBGene00004454	ENSG00000165502	WBGene00004454
WBGene00004454	ENSG00000241343	WBGene00004454
WBGene00004454	ENSG00000257529	WBGene00004454
WBGene00004456	ENSG00000197756	WBGene00004456
WBGene00004457	ENSG00000005810	WBGene00004457
WBGene00004458	ENSG00000175166	WBGene00004458
WBGene00004459	ENSG00000173692	WBGene00004459
WBGene00004460	ENSG00000108344	WBGene00004460
WBGene00004461	ENSG00000197170	WBGene00004461
WBGene00004462	ENSG00000108671	WBGene00004462
WBGene00004463	ENSG00000163636	WBGene00004463
WBGene00004464	ENSG00000103035	WBGene00004464
WBGene00004465	ENSG00000185627	WBGene00004465
WBGene00004466	ENSG00000159352	WBGene00004466
WBGene00004467	ENSG00000115233	WBGene00004467
WBGene00004469	ENSG00000168028	WBGene00004469
WBGene00004469	ENSG00000205246	WBGene00004469
WBGene00004470	ENSG00000145425	WBGene00004470
WBGene00004471	ENSG00000140988	WBGene00004471
WBGene00004472	ENSG00000149273	WBGene00004472
WBGene00004473	ENSG00000129824	WBGene00004473
WBGene00004473	ENSG00000198034	WBGene00004473
WBGene00004474	ENSG00000083845	WBGene00004474
WBGene00004475	ENSG00000137154	WBGene00004475
WBGene00004476	ENSG00000171863	WBGene00004476
WBGene00004477	ENSG00000142937	WBGene00004477
WBGene00004478	ENSG00000278270	WBGene00004478
WBGene00004479	ENSG00000124614	WBGene00004479
WBGene00004480	ENSG00000142534	WBGene00004480
WBGene00004481	ENSG00000112306	WBGene00004481
WBGene00004482	ENSG00000110700	WBGene00004482
WBGene00004483	ENSG00000164587	WBGene00004483
WBGene00004484	ENSG00000115268	WBGene00004484
WBGene00004485	ENSG00000105193	WBGene00004485
WBGene00004486	ENSG00000182774	WBGene00004486
WBGene00004486	ENSG00000278229	WBGene00004486
WBGene00004487	ENSG00000096150	WBGene00004487
WBGene00004488	ENSG00000105372	WBGene00004488
WBGene00004489	ENSG00000008988	WBGene00004489
WBGene00004490	ENSG00000171858	WBGene00004490
WBGene00004491	ENSG00000134419	WBGene00004491
WBGene00004492	ENSG00000186468	WBGene00004492
WBGene00004494	ENSG00000280831	WBGene00004494
WBGene00004495	ENSG00000197728	WBGene00004495
WBGene00004496	ENSG00000177954	WBGene00004496
WBGene00004496	ENSG00000185088	WBGene00004496
WBGene00004497	ENSG00000233927	WBGene00004497
WBGene00004498	ENSG00000213741	WBGene00004498
WBGene00004499	ENSG00000149806	WBGene00004499
WBGene00004501	ENSG00000161057	WBGene00004501
WBGene00004502	ENSG00000100764	WBGene00004502
WBGene00004503	ENSG00000281221	WBGene00004503
WBGene00004504	ENSG00000100519	WBGene00004504
WBGene00004505	ENSG00000165916	WBGene00004505
WBGene00004507	ENSG00000165917	WBGene00004507
WBGene00004679	ENSG00000113643	WBGene00004679
WBGene00004680	ENSG00000146282	WBGene00004680
WBGene00004698	ENSG00000124193	WBGene00004698
WBGene00004703	ENSG00000115875	WBGene00004703
WBGene00004704	ENSG00000153914	WBGene00004704
WBGene00004705	ENSG00000164548	WBGene00004705
WBGene00004706	ENSG00000133226	WBGene00004706
WBGene00004719	ENSG00000174672	WBGene00004719
WBGene00004723	ENSG00000143368	WBGene00004723
WBGene00004728	ENSG00000073910	WBGene00004728
WBGene00004728	ENSG00000075539	WBGene00004728
WBGene00004732	ENSG00000091129	WBGene00004732
WBGene00004732	ENSG00000163531	WBGene00004732
WBGene00004735	ENSG00000072310	WBGene00004735
WBGene00004735	ENSG00000198911	WBGene00004735
WBGene00004736	ENSG00000074370	WBGene00004736
WBGene00004736	ENSG00000174437	WBGene00004736
WBGene00004736	ENSG00000196296	WBGene00004736
WBGene00004737	ENSG00000164754	WBGene00004737
WBGene00004737	ENSG00000244588	WBGene00004737
WBGene00004738	ENSG00000066923	WBGene00004738
WBGene00004738	ENSG00000101972	WBGene00004738
WBGene00004738	ENSG00000118007	WBGene00004738
WBGene00004748	ENSG00000196396	WBGene00004748
WBGene00004752	ENSG00000112685	WBGene00004752
WBGene00004753	ENSG00000131558	WBGene00004753
WBGene00004755	ENSG00000176986	WBGene00004755
WBGene00004756	ENSG00000113615	WBGene00004756
WBGene00004756	ENSG00000138802	WBGene00004756
WBGene00004758	ENSG00000034152	WBGene00004758
WBGene00004758	ENSG00000108984	WBGene00004758
WBGene00004759	ENSG00000071537	WBGene00004759
WBGene00004760	ENSG00000172915	WBGene00004760
WBGene00004760	ENSG00000198589	WBGene00004760
WBGene00004766	ENSG00000086598	WBGene00004766
WBGene00004767	ENSG00000109670	WBGene00004767
WBGene00004768	ENSG00000162298	WBGene00004768
WBGene00004769	ENSG00000143801	WBGene00004769
WBGene00004773	ENSG00000180035	WBGene00004773
WBGene00004774	ENSG00000177885	WBGene00004774
WBGene00004779	ENSG00000178394	WBGene00004779
WBGene00004783	ENSG00000130528	WBGene00004783
WBGene00004786	ENSG00000132170	WBGene00004786
WBGene00004787	ENSG00000280627	WBGene00004787
WBGene00004788	ENSG00000280951	WBGene00004788
WBGene00004789	ENSG00000101049	WBGene00004789
WBGene00004789	ENSG00000118515	WBGene00004789
WBGene00004790	ENSG00000102683	WBGene00004790
WBGene00004790	ENSG00000170624	WBGene00004790
WBGene00004790	ENSG00000185053	WBGene00004790
WBGene00004793	ENSG00000129159	WBGene00004793
WBGene00004793	ENSG00000166006	WBGene00004793
WBGene00004798	ENSG00000160202	WBGene00004798
WBGene00004798	ENSG00000276076	WBGene00004798
WBGene00004801	ENSG00000089163	WBGene00004801
WBGene00004803	ENSG00000077463	WBGene00004803
WBGene00004806	ENSG00000100603	WBGene00004806
WBGene00004807	ENSG00000113558	WBGene00004807
WBGene00004829	ENSG00000142273	WBGene00004829
WBGene00004830	ENSG00000156113	WBGene00004830
WBGene00004831	ENSG00000107147	WBGene00004831
WBGene00004831	ENSG00000162687	WBGene00004831
WBGene00004854	ENSG00000145147	WBGene00004854
WBGene00004854	ENSG00000184347	WBGene00004854
WBGene00004856	ENSG00000113658	WBGene00004856
WBGene00004856	ENSG00000120693	WBGene00004856
WBGene00004856	ENSG00000170365	WBGene00004856
WBGene00004857	ENSG00000175387	WBGene00004857
WBGene00004860	ENSG00000138696	WBGene00004860
WBGene00004873	ENSG00000108055	WBGene00004873
WBGene00004874	ENSG00000113810	WBGene00004874
WBGene00004876	ENSG00000018280	WBGene00004876
WBGene00004877	ENSG00000018280	WBGene00004877
WBGene00004880	ENSG00000005007	WBGene00004880
WBGene00004881	ENSG00000151461	WBGene00004881
WBGene00004886	ENSG00000092208	WBGene00004886
WBGene00004887	ENSG00000275349	WBGene00004887
WBGene00004887	ENSG00000277773	WBGene00004887
WBGene00004890	ENSG00000138623	WBGene00004890
WBGene00004891	ENSG00000119953	WBGene00004891
WBGene00004892	ENSG00000164023	WBGene00004892
WBGene00004895	ENSG00000122692	WBGene00004895
WBGene00004896	ENSG00000113141	WBGene00004896
WBGene00004897	ENSG00000263620	WBGene00004897
WBGene00004912	ENSG00000100321	WBGene00004912
WBGene00004913	ENSG00000185666	WBGene00004913
WBGene00004914	ENSG00000100028	WBGene00004914
WBGene00004916	ENSG00000167088	WBGene00004916
WBGene00004917	ENSG00000125743	WBGene00004917
WBGene00004918	ENSG00000139343	WBGene00004918
WBGene00004919	ENSG00000182004	WBGene00004919
WBGene00004920	ENSG00000143977	WBGene00004920
WBGene00004921	ENSG00000067715	WBGene00004921
WBGene00004927	ENSG00000028528	WBGene00004927
WBGene00004927	ENSG00000205302	WBGene00004927
WBGene00004929	ENSG00000108061	WBGene00004929
WBGene00004930	ENSG00000142168	WBGene00004930
WBGene00004931	ENSG00000112096	WBGene00004931
WBGene00004947	ENSG00000100485	WBGene00004947
WBGene00004947	ENSG00000115904	WBGene00004947
WBGene00004951	ENSG00000197694	WBGene00004951
WBGene00004952	ENSG00000198901	WBGene00004952
WBGene00004969	ENSG00000196586	WBGene00004969
WBGene00004975	ENSG00000151445	WBGene00004975
WBGene00004978	ENSG00000141385	WBGene00004978
WBGene00004979	ENSG00000008282	WBGene00004979
WBGene00004979	ENSG00000102003	WBGene00004979
WBGene00004979	ENSG00000143028	WBGene00004979
WBGene00004979	ENSG00000163630	WBGene00004979
WBGene00004980	ENSG00000096063	WBGene00004980
WBGene00004980	ENSG00000135250	WBGene00004980
WBGene00004980	ENSG00000184343	WBGene00004980
WBGene00004981	ENSG00000166224	WBGene00004981
WBGene00004985	ENSG00000054796	WBGene00004985
WBGene00004995	ENSG00000197746	WBGene00004995
WBGene00005007	ENSG00000119335	WBGene00005007
WBGene00005007	ENSG00000230667	WBGene00005007
WBGene00005009	ENSG00000267041	WBGene00005009
WBGene00005014	ENSG00000213246	WBGene00005014
WBGene00005015	ENSG00000196235	WBGene00005015
WBGene00005019	ENSG00000115652	WBGene00005019
WBGene00005020	ENSG00000176022	WBGene00005020
WBGene00005021	ENSG00000027847	WBGene00005021
WBGene00005022	ENSG00000109814	WBGene00005022
WBGene00005023	ENSG00000131873	WBGene00005023
WBGene00005023	ENSG00000198108	WBGene00005023
WBGene00005025	ENSG00000116704	WBGene00005025
WBGene00005026	ENSG00000109956	WBGene00005026
WBGene00005026	ENSG00000112309	WBGene00005026
WBGene00005026	ENSG00000149541	WBGene00005026
WBGene00005077	ENSG00000010810	WBGene00005077
WBGene00005077	ENSG00000176105	WBGene00005077
WBGene00005077	ENSG00000197122	WBGene00005077
WBGene00005078	ENSG00000010810	WBGene00005078
WBGene00005078	ENSG00000176105	WBGene00005078
WBGene00005078	ENSG00000197122	WBGene00005078
WBGene00005649	ENSG00000206075	WBGene00005649
WBGene00006059	ENSG00000155304	WBGene00006059
WBGene00006061	ENSG00000165283	WBGene00006061
WBGene00006062	ENSG00000101400	WBGene00006062
WBGene00006062	ENSG00000168807	WBGene00006062
WBGene00006062	ENSG00000172164	WBGene00006062
WBGene00006307	ENSG00000176102	WBGene00006307
WBGene00006308	ENSG00000137573	WBGene00006308
WBGene00006308	ENSG00000196562	WBGene00006308
WBGene00006310	ENSG00000113273	WBGene00006310
WBGene00006310	ENSG00000180801	WBGene00006310
WBGene00006310	ENSG00000183876	WBGene00006310
WBGene00006318	ENSG00000169427	WBGene00006318
WBGene00006318	ENSG00000171303	WBGene00006318
WBGene00006324	ENSG00000137845	WBGene00006324
WBGene00006349	ENSG00000112282	WBGene00006349
WBGene00006351	ENSG00000081760	WBGene00006351
WBGene00006352	ENSG00000175470	WBGene00006352
WBGene00006352	ENSG00000221914	WBGene00006352
WBGene00006359	ENSG00000061936	WBGene00006359
WBGene00006364	ENSG00000131626	WBGene00006364
WBGene00006364	ENSG00000139220	WBGene00006364
WBGene00006364	ENSG00000143847	WBGene00006364
WBGene00006364	ENSG00000177380	WBGene00006364
WBGene00006365	ENSG00000126259	WBGene00006365
WBGene00006365	ENSG00000183853	WBGene00006365
WBGene00006382	ENSG00000122728	WBGene00006382
WBGene00006382	ENSG00000147133	WBGene00006382
WBGene00006383	ENSG00000064313	WBGene00006383
WBGene00006384	ENSG00000165632	WBGene00006384
WBGene00006386	ENSG00000148835	WBGene00006386
WBGene00006395	ENSG00000064995	WBGene00006395
WBGene00006397	ENSG00000197780	WBGene00006397
WBGene00006402	ENSG00000172461	WBGene00006402
WBGene00006405	ENSG00000198399	WBGene00006405
WBGene00006405	ENSG00000205726	WBGene00006405
WBGene00006406	ENSG00000089820	WBGene00006406
WBGene00006406	ENSG00000196220	WBGene00006406
WBGene00006406	ENSG00000196935	WBGene00006406
WBGene00006406	ENSG00000266028	WBGene00006406
WBGene00006410	ENSG00000071051	WBGene00006410
WBGene00006410	ENSG00000158092	WBGene00006410
WBGene00006412	ENSG00000146938	WBGene00006412
WBGene00006412	ENSG00000165246	WBGene00006412
WBGene00006412	ENSG00000196338	WBGene00006412
WBGene00006414	ENSG00000083750	WBGene00006414
WBGene00006414	ENSG00000155876	WBGene00006414
WBGene00006415	ENSG00000133243	WBGene00006415
WBGene00006416	ENSG00000151224	WBGene00006416
WBGene00006416	ENSG00000168906	WBGene00006416
WBGene00006432	ENSG00000088812	WBGene00006432
WBGene00006432	ENSG00000107518	WBGene00006432
WBGene00006433	ENSG00000117118	WBGene00006433
WBGene00006437	ENSG00000143776	WBGene00006437
WBGene00006437	ENSG00000198752	WBGene00006437
WBGene00006443	ENSG00000101349	WBGene00006443
WBGene00006446	ENSG00000066427	WBGene00006446
WBGene00006446	ENSG00000123594	WBGene00006446
WBGene00006447	ENSG00000101654	WBGene00006447
WBGene00006448	ENSG00000167699	WBGene00006448
WBGene00006453	ENSG00000145113	WBGene00006453
WBGene00006453	ENSG00000276613	WBGene00006453
WBGene00006453	ENSG00000278468	WBGene00006453
WBGene00006460	ENSG00000138032	WBGene00006460
WBGene00006461	ENSG00000156958	WBGene00006461
WBGene00006463	ENSG00000158864	WBGene00006463
WBGene00006465	ENSG00000125954	WBGene00006465
WBGene00006465	ENSG00000257365	WBGene00006465
WBGene00006466	ENSG00000168061	WBGene00006466
WBGene00006467	ENSG00000072415	WBGene00006467
WBGene00006468	ENSG00000132694	WBGene00006468
WBGene00006468	ENSG00000196914	WBGene00006468
WBGene00006470	ENSG00000135472	WBGene00006470
WBGene00006473	ENSG00000110060	WBGene00006473
WBGene00006474	ENSG00000196363	WBGene00006474
WBGene00006477	ENSG00000072858	WBGene00006477
WBGene00006477	ENSG00000149577	WBGene00006477
WBGene00006478	ENSG00000167740	WBGene00006478
WBGene00006481	ENSG00000171566	WBGene00006481
WBGene00006483	ENSG00000077044	WBGene00006483
WBGene00006483	ENSG00000102780	WBGene00006483
WBGene00006483	ENSG00000280873	WBGene00006483
WBGene00006491	ENSG00000102125	WBGene00006491
WBGene00006493	ENSG00000116679	WBGene00006493
WBGene00006496	ENSG00000126217	WBGene00006496
WBGene00006497	ENSG00000167721	WBGene00006497
WBGene00006498	ENSG00000145934	WBGene00006498
WBGene00006498	ENSG00000218336	WBGene00006498
WBGene00006503	ENSG00000112335	WBGene00006503
WBGene00006503	ENSG00000147164	WBGene00006503
WBGene00006505	ENSG00000223802	WBGene00006505
WBGene00006510	ENSG00000124275	WBGene00006510
WBGene00006512	ENSG00000225989	WBGene00006512
WBGene00006514	ENSG00000120948	WBGene00006514
WBGene00006515	ENSG00000115514	WBGene00006515
WBGene00006516	ENSG00000215305	WBGene00006516
WBGene00006518	ENSG00000083123	WBGene00006518
WBGene00006520	ENSG00000166471	WBGene00006520
WBGene00006524	ENSG00000100324	WBGene00006524
WBGene00006526	ENSG00000144191	WBGene00006526
WBGene00006526	ENSG00000183862	WBGene00006526
WBGene00006526	ENSG00000198515	WBGene00006526
WBGene00006527	ENSG00000107758	WBGene00006527
WBGene00006527	ENSG00000138814	WBGene00006527
WBGene00006528	ENSG00000183785	WBGene00006528
WBGene00006529	ENSG00000183785	WBGene00006529
WBGene00006535	ENSG00000183785	WBGene00006535
WBGene00006540	ENSG00000037042	WBGene00006540
WBGene00006540	ENSG00000131462	WBGene00006540
WBGene00006541	ENSG00000123454	WBGene00006541
WBGene00006545	ENSG00000167800	WBGene00006545
WBGene00006558	ENSG00000164458	WBGene00006558
WBGene00006559	ENSG00000164458	WBGene00006559
WBGene00006563	ENSG00000169217	WBGene00006563
WBGene00006565	ENSG00000105879	WBGene00006565
WBGene00006566	ENSG00000213339	WBGene00006566
WBGene00006567	ENSG00000151576	WBGene00006567
WBGene00006568	ENSG00000167900	WBGene00006568
WBGene00006571	ENSG00000111602	WBGene00006571
WBGene00006572	ENSG00000100575	WBGene00006572
WBGene00006573	ENSG00000134809	WBGene00006573
WBGene00006574	ENSG00000099800	WBGene00006574
WBGene00006575	ENSG00000004139	WBGene00006575
WBGene00006576	ENSG00000169836	WBGene00006576
WBGene00006578	ENSG00000078902	WBGene00006578
WBGene00006584	ENSG00000129991	WBGene00006584
WBGene00006584	ENSG00000130598	WBGene00006584
WBGene00006586	ENSG00000129991	WBGene00006586
WBGene00006586	ENSG00000130598	WBGene00006586
WBGene00006588	ENSG00000105048	WBGene00006588
WBGene00006588	ENSG00000118194	WBGene00006588
WBGene00006588	ENSG00000130595	WBGene00006588
WBGene00006589	ENSG00000105048	WBGene00006589
WBGene00006589	ENSG00000118194	WBGene00006589
WBGene00006589	ENSG00000130595	WBGene00006589
WBGene00006594	ENSG00000145087	WBGene00006594
WBGene00006594	ENSG00000164506	WBGene00006594
WBGene00006595	ENSG00000184428	WBGene00006595
WBGene00006595	ENSG00000198900	WBGene00006595
WBGene00006597	ENSG00000136816	WBGene00006597
WBGene00006597	ENSG00000136827	WBGene00006597
WBGene00006598	ENSG00000136816	WBGene00006598
WBGene00006598	ENSG00000136827	WBGene00006598
WBGene00006599	ENSG00000065675	WBGene00006599
WBGene00006599	ENSG00000163932	WBGene00006599
[truncated: 3,371 more rows]

## Sheet: OrthoInspector
CE_WB_CURRENT	HS_ENSG	CE_WB_OLD	CE_WB_COMMENT
WBGene00000001	ENSG00000105647	WBGene00000001
WBGene00000001	ENSG00000117461	WBGene00000001
WBGene00000001	ENSG00000145675	WBGene00000001
WBGene00000002	ENSG00000092068	WBGene00000002
WBGene00000002	ENSG00000103064	WBGene00000002
WBGene00000002	ENSG00000103257	WBGene00000002
WBGene00000002	ENSG00000155465	WBGene00000002
WBGene00000004	ENSG00000092068	WBGene00000004
WBGene00000004	ENSG00000103064	WBGene00000004
WBGene00000004	ENSG00000103257	WBGene00000004
WBGene00000004	ENSG00000155465	WBGene00000004
WBGene00000018	ENSG00000097007	WBGene00000018
WBGene00000018	ENSG00000143322	WBGene00000018
WBGene00000020	ENSG00000064687	WBGene00000020
WBGene00000020	ENSG00000144452	WBGene00000020
WBGene00000020	ENSG00000165029	WBGene00000020
WBGene00000020	ENSG00000179869	WBGene00000020
WBGene00000020	ENSG00000198691	WBGene00000020
WBGene00000022	ENSG00000167972	WBGene00000022
WBGene00000035	ENSG00000087085	WBGene00000035
WBGene00000035	ENSG00000114200	WBGene00000035
WBGene00000039	ENSG00000130234	WBGene00000039
WBGene00000039	ENSG00000159640	WBGene00000039
WBGene00000040	ENSG00000122729	WBGene00000040
WBGene00000041	ENSG00000100412	WBGene00000041
WBGene00000048	ENSG00000166664	WBGene00000048
WBGene00000048	ENSG00000175344	WBGene00000048
WBGene00000050	ENSG00000166664	WBGene00000050
WBGene00000050	ENSG00000175344	WBGene00000050
WBGene00000055	ENSG00000166664	WBGene00000055
WBGene00000055	ENSG00000175344	WBGene00000055
WBGene00000060	ENSG00000174343	WBGene00000060
WBGene00000063	ENSG00000075624	WBGene00000063
WBGene00000063	ENSG00000184009	WBGene00000063
WBGene00000064	ENSG00000075624	WBGene00000064
WBGene00000064	ENSG00000184009	WBGene00000064
WBGene00000065	ENSG00000075624	WBGene00000065
WBGene00000065	ENSG00000184009	WBGene00000065
WBGene00000066	ENSG00000075624	WBGene00000066
WBGene00000066	ENSG00000184009	WBGene00000066
WBGene00000068	ENSG00000162104	WBGene00000068
WBGene00000071	ENSG00000078295	WBGene00000071
WBGene00000071	ENSG00000138031	WBGene00000071
WBGene00000071	ENSG00000155897	WBGene00000071
WBGene00000071	ENSG00000164742	WBGene00000071
WBGene00000071	ENSG00000173175	WBGene00000071
WBGene00000071	ENSG00000174233	WBGene00000071
WBGene00000072	ENSG00000075340	WBGene00000072
WBGene00000072	ENSG00000087274	WBGene00000072
WBGene00000072	ENSG00000148700	WBGene00000072
WBGene00000074	ENSG00000042980	WBGene00000074
WBGene00000074	ENSG00000069206	WBGene00000074
WBGene00000074	ENSG00000134007	WBGene00000074
WBGene00000074	ENSG00000134249	WBGene00000074
WBGene00000074	ENSG00000135074	WBGene00000074
WBGene00000074	ENSG00000139985	WBGene00000074
WBGene00000074	ENSG00000148848	WBGene00000074
WBGene00000074	ENSG00000149451	WBGene00000074
WBGene00000074	ENSG00000151651	WBGene00000074
WBGene00000074	ENSG00000168594	WBGene00000074
WBGene00000074	ENSG00000168615	WBGene00000074
WBGene00000075	ENSG00000151694	WBGene00000075
WBGene00000080	ENSG00000160710	WBGene00000080
WBGene00000080	ENSG00000185736	WBGene00000080
WBGene00000080	ENSG00000197381	WBGene00000080
WBGene00000081	ENSG00000018510	WBGene00000081
WBGene00000086	ENSG00000110514	WBGene00000086
WBGene00000089	ENSG00000041353	WBGene00000089
WBGene00000089	ENSG00000069974	WBGene00000089
WBGene00000090	ENSG00000121879	WBGene00000090
WBGene00000092	ENSG00000121957	WBGene00000092
WBGene00000092	ENSG00000160360	WBGene00000092
WBGene00000095	ENSG00000143437	WBGene00000095
WBGene00000095	ENSG00000172379	WBGene00000095
WBGene00000096	ENSG00000063438	WBGene00000096
WBGene00000096	ENSG00000106546	WBGene00000096
WBGene00000097	ENSG00000158552	WBGene00000097
WBGene00000097	ENSG00000178381	WBGene00000097
WBGene00000099	ENSG00000087586	WBGene00000099
WBGene00000099	ENSG00000105146	WBGene00000099
WBGene00000099	ENSG00000178999	WBGene00000099
WBGene00000100	ENSG00000232434	WBGene00000100
WBGene00000101	ENSG00000039319	WBGene00000101
WBGene00000101	ENSG00000157077	WBGene00000101
WBGene00000102	ENSG00000105221	WBGene00000102
WBGene00000102	ENSG00000117020	WBGene00000102
WBGene00000102	ENSG00000142208	WBGene00000102
WBGene00000102	ENSG00000275199	WBGene00000102
WBGene00000103	ENSG00000105221	WBGene00000103
WBGene00000103	ENSG00000117020	WBGene00000103
WBGene00000103	ENSG00000142208	WBGene00000103
WBGene00000103	ENSG00000275199	WBGene00000103
WBGene00000105	ENSG00000092847	WBGene00000105
WBGene00000105	ENSG00000123908	WBGene00000105
WBGene00000105	ENSG00000126070	WBGene00000105
WBGene00000105	ENSG00000134698	WBGene00000105
WBGene00000106	ENSG00000092847	WBGene00000106
WBGene00000106	ENSG00000123908	WBGene00000106
WBGene00000106	ENSG00000126070	WBGene00000106
WBGene00000106	ENSG00000134698	WBGene00000106
WBGene00000107	ENSG00000111275	WBGene00000107
WBGene00000107	ENSG00000128918	WBGene00000107
WBGene00000107	ENSG00000137124	WBGene00000107
WBGene00000107	ENSG00000165092	WBGene00000107
WBGene00000108	ENSG00000111275	WBGene00000108
WBGene00000108	ENSG00000128918	WBGene00000108
WBGene00000108	ENSG00000137124	WBGene00000108
WBGene00000108	ENSG00000165092	WBGene00000108
WBGene00000109	ENSG00000136010	WBGene00000109
WBGene00000109	ENSG00000144908	WBGene00000109
WBGene00000110	ENSG00000072210	WBGene00000110
WBGene00000110	ENSG00000108602	WBGene00000110
WBGene00000111	ENSG00000072210	WBGene00000111
WBGene00000111	ENSG00000108602	WBGene00000111
WBGene00000112	ENSG00000159423	WBGene00000112
WBGene00000113	ENSG00000112294	WBGene00000113
WBGene00000114	ENSG00000119711	WBGene00000114
WBGene00000115	ENSG00000164904	WBGene00000115
WBGene00000116	ENSG00000118514	WBGene00000116
WBGene00000117	ENSG00000143149	WBGene00000117
WBGene00000118	ENSG00000143149	WBGene00000118
WBGene00000137	ENSG00000165097	WBGene00000137
WBGene00000139	ENSG00000088826	WBGene00000139
WBGene00000139	ENSG00000148832	WBGene00000139
WBGene00000140	ENSG00000131018	WBGene00000140
WBGene00000142	ENSG00000142230	WBGene00000142
WBGene00000143	ENSG00000176248	WBGene00000143
WBGene00000145	ENSG00000141552	WBGene00000145
WBGene00000146	ENSG00000088808	WBGene00000146
WBGene00000146	ENSG00000104881	WBGene00000146
WBGene00000146	ENSG00000143514	WBGene00000146
WBGene00000147	ENSG00000117362	WBGene00000147
WBGene00000147	ENSG00000138613	WBGene00000147
WBGene00000148	ENSG00000162736	WBGene00000148
WBGene00000149	ENSG00000084234	WBGene00000149
WBGene00000149	ENSG00000105290	WBGene00000149
WBGene00000149	ENSG00000142192	WBGene00000149
WBGene00000155	ENSG00000108039	WBGene00000155
WBGene00000155	ENSG00000122121	WBGene00000155
WBGene00000156	ENSG00000134982	WBGene00000156
WBGene00000157	ENSG00000042753	WBGene00000157
WBGene00000158	ENSG00000166747	WBGene00000158
WBGene00000158	ENSG00000213983	WBGene00000158
WBGene00000159	ENSG00000106367	WBGene00000159
WBGene00000159	ENSG00000182287	WBGene00000159
WBGene00000160	ENSG00000006125	WBGene00000160
WBGene00000160	ENSG00000100280	WBGene00000160
WBGene00000161	ENSG00000183020	WBGene00000161
WBGene00000161	ENSG00000196961	WBGene00000161
WBGene00000162	ENSG00000065000	WBGene00000162
WBGene00000163	ENSG00000103723	WBGene00000163
WBGene00000163	ENSG00000132842	WBGene00000163
WBGene00000164	ENSG00000070718	WBGene00000164
WBGene00000164	ENSG00000185009	WBGene00000164
WBGene00000165	ENSG00000157823	WBGene00000165
WBGene00000165	ENSG00000177879	WBGene00000165
WBGene00000165	ENSG00000242498	WBGene00000165
WBGene00000166	ENSG00000100083	WBGene00000166
WBGene00000166	ENSG00000103365	WBGene00000166
WBGene00000166	ENSG00000125447	WBGene00000166
WBGene00000169	ENSG00000103569	WBGene00000169
WBGene00000169	ENSG00000143595	WBGene00000169
WBGene00000169	ENSG00000165269	WBGene00000169
WBGene00000169	ENSG00000165272	WBGene00000169
WBGene00000170	ENSG00000103569	WBGene00000170
WBGene00000170	ENSG00000143595	WBGene00000170
WBGene00000170	ENSG00000165269	WBGene00000170
WBGene00000170	ENSG00000165272	WBGene00000170
WBGene00000171	ENSG00000103569	WBGene00000171
WBGene00000171	ENSG00000143595	WBGene00000171
WBGene00000171	ENSG00000165269	WBGene00000171
WBGene00000171	ENSG00000165272	WBGene00000171
WBGene00000172	ENSG00000103375	WBGene00000172
WBGene00000173	ENSG00000103375	WBGene00000173
WBGene00000174	ENSG00000103375	WBGene00000174
WBGene00000175	ENSG00000103569	WBGene00000175
WBGene00000175	ENSG00000143595	WBGene00000175
WBGene00000175	ENSG00000165269	WBGene00000175
WBGene00000175	ENSG00000165272	WBGene00000175
WBGene00000180	ENSG00000113595	WBGene00000180
WBGene00000181	ENSG00000072506	WBGene00000181
WBGene00000182	ENSG00000134287	WBGene00000182
WBGene00000182	ENSG00000143761	WBGene00000182
WBGene00000184	ENSG00000165527	WBGene00000184
WBGene00000187	ENSG00000120805	WBGene00000187
WBGene00000188	ENSG00000138175	WBGene00000188
WBGene00000189	ENSG00000141748	WBGene00000189
WBGene00000189	ENSG00000162980	WBGene00000189
WBGene00000189	ENSG00000165997	WBGene00000189
WBGene00000192	ENSG00000134108	WBGene00000192
WBGene00000192	ENSG00000143862	WBGene00000192
WBGene00000193	ENSG00000113966	WBGene00000193
WBGene00000195	ENSG00000120500	WBGene00000195
WBGene00000195	ENSG00000137486	WBGene00000195
WBGene00000195	ENSG00000141480	WBGene00000195
WBGene00000197	ENSG00000090861	WBGene00000197
WBGene00000198	ENSG00000099797	WBGene00000198
WBGene00000198	ENSG00000205678	WBGene00000198
WBGene00000199	ENSG00000115091	WBGene00000199
WBGene00000199	ENSG00000133627	WBGene00000199
WBGene00000200	ENSG00000138071	WBGene00000200
WBGene00000201	ENSG00000130429	WBGene00000201
WBGene00000201	ENSG00000241685	WBGene00000201
WBGene00000203	ENSG00000111229	WBGene00000203
WBGene00000204	ENSG00000241553	WBGene00000204
WBGene00000205	ENSG00000136950	WBGene00000205
WBGene00000205	ENSG00000162704	WBGene00000205
WBGene00000208	ENSG00000103671	WBGene00000208
WBGene00000209	ENSG00000167283	WBGene00000209
WBGene00000210	ENSG00000167283	WBGene00000210
WBGene00000212	ENSG00000166311	WBGene00000212
WBGene00000213	ENSG00000166311	WBGene00000213
WBGene00000217	ENSG00000117984	WBGene00000217
WBGene00000217	ENSG00000250644	WBGene00000217
WBGene00000220	ENSG00000165030	WBGene00000220
WBGene00000222	ENSG00000118217	WBGene00000222
WBGene00000224	ENSG00000138079	WBGene00000224
WBGene00000225	ENSG00000138079	WBGene00000225
WBGene00000226	ENSG00000175054	WBGene00000226
WBGene00000227	ENSG00000149311	WBGene00000227
WBGene00000228	ENSG00000072110	WBGene00000228
WBGene00000228	ENSG00000077522	WBGene00000228
WBGene00000228	ENSG00000130402	WBGene00000228
WBGene00000228	ENSG00000282844	WBGene00000228
WBGene00000229	ENSG00000110955	WBGene00000229
WBGene00000230	ENSG00000241837	WBGene00000230
WBGene00000230	ENSG00000249209	WBGene00000230
WBGene00000231	ENSG00000168488	WBGene00000231
WBGene00000232	ENSG00000101958	WBGene00000232
WBGene00000232	ENSG00000109738	WBGene00000232
WBGene00000232	ENSG00000145451	WBGene00000232
WBGene00000232	ENSG00000145888	WBGene00000232
WBGene00000232	ENSG00000188828	WBGene00000232
WBGene00000233	ENSG00000101958	WBGene00000233
WBGene00000233	ENSG00000109738	WBGene00000233
WBGene00000233	ENSG00000145451	WBGene00000233
WBGene00000233	ENSG00000145888	WBGene00000233
WBGene00000233	ENSG00000188828	WBGene00000233
WBGene00000235	ENSG00000175334	WBGene00000235
WBGene00000240	ENSG00000171759	WBGene00000240
WBGene00000241	ENSG00000174483	WBGene00000241
WBGene00000242	ENSG00000125124	WBGene00000242
WBGene00000244	ENSG00000165533	WBGene00000244
WBGene00000246	ENSG00000122870	WBGene00000246
WBGene00000247	ENSG00000126581	WBGene00000247
WBGene00000253	ENSG00000137857	WBGene00000253
WBGene00000253	ENSG00000140279	WBGene00000253
WBGene00000254	ENSG00000099139	WBGene00000254
WBGene00000254	ENSG00000115257	WBGene00000254
WBGene00000254	ENSG00000140479	WBGene00000254
WBGene00000254	ENSG00000140564	WBGene00000254
WBGene00000254	ENSG00000175426	WBGene00000254
WBGene00000257	ENSG00000138160	WBGene00000257
WBGene00000259	ENSG00000159267	WBGene00000259
WBGene00000262	ENSG00000015171	WBGene00000262
WBGene00000262	ENSG00000101040	WBGene00000262
WBGene00000266	ENSG00000112699	WBGene00000266
WBGene00000269	ENSG00000086062	WBGene00000269
WBGene00000269	ENSG00000117411	WBGene00000269
WBGene00000269	ENSG00000121578	WBGene00000269
WBGene00000269	ENSG00000158850	WBGene00000269
WBGene00000270	ENSG00000169255	WBGene00000270
WBGene00000271	ENSG00000185024	WBGene00000271
WBGene00000274	ENSG00000095564	WBGene00000274
WBGene00000275	ENSG00000169679	WBGene00000275
WBGene00000276	ENSG00000112578	WBGene00000276
WBGene00000279	ENSG00000063180	WBGene00000279
WBGene00000279	ENSG00000154975	WBGene00000279
WBGene00000280	ENSG00000063180	WBGene00000280
WBGene00000280	ENSG00000154975	WBGene00000280
WBGene00000281	ENSG00000104267	WBGene00000281
WBGene00000281	ENSG00000133742	WBGene00000281
WBGene00000281	ENSG00000164879	WBGene00000281
WBGene00000281	ENSG00000168748	WBGene00000281
WBGene00000281	ENSG00000169239	WBGene00000281
WBGene00000281	ENSG00000174990	WBGene00000281
WBGene00000281	ENSG00000178538	WBGene00000281
WBGene00000281	ENSG00000185015	WBGene00000281
WBGene00000283	ENSG00000104267	WBGene00000283
WBGene00000283	ENSG00000133742	WBGene00000283
WBGene00000283	ENSG00000164879	WBGene00000283
WBGene00000283	ENSG00000168748	WBGene00000283
WBGene00000283	ENSG00000169239	WBGene00000283
WBGene00000283	ENSG00000174990	WBGene00000283
WBGene00000283	ENSG00000178538	WBGene00000283
WBGene00000283	ENSG00000185015	WBGene00000283
WBGene00000289	ENSG00000169071	WBGene00000289
WBGene00000289	ENSG00000185483	WBGene00000289
WBGene00000292	ENSG00000116489	WBGene00000292
WBGene00000292	ENSG00000198898	WBGene00000292
WBGene00000293	ENSG00000077549	WBGene00000293
WBGene00000294	ENSG00000112186	WBGene00000294
WBGene00000294	ENSG00000131236	WBGene00000294
WBGene00000295	ENSG00000036565	WBGene00000295
WBGene00000295	ENSG00000165646	WBGene00000295
WBGene00000298	ENSG00000131979	WBGene00000298
WBGene00000301	ENSG00000105971	WBGene00000301
WBGene00000301	ENSG00000105974	WBGene00000301
WBGene00000301	ENSG00000182533	WBGene00000301
WBGene00000302	ENSG00000105971	WBGene00000302
WBGene00000302	ENSG00000105974	WBGene00000302
WBGene00000302	ENSG00000182533	WBGene00000302
WBGene00000366	ENSG00000005339	WBGene00000366
WBGene00000366	ENSG00000100393	WBGene00000366
WBGene00000367	ENSG00000006283	WBGene00000367
WBGene00000367	ENSG00000100346	WBGene00000367
WBGene00000367	ENSG00000196557	WBGene00000367
WBGene00000368	ENSG00000067191	WBGene00000368
WBGene00000368	ENSG00000165995	WBGene00000368
WBGene00000368	ENSG00000167535	WBGene00000368
WBGene00000368	ENSG00000182389	WBGene00000368
WBGene00000369	ENSG00000155508	WBGene00000369
WBGene00000369	ENSG00000198791	WBGene00000369
WBGene00000371	ENSG00000135940	WBGene00000371
WBGene00000372	ENSG00000021461	WBGene00000372
WBGene00000372	ENSG00000059377	WBGene00000372
WBGene00000372	ENSG00000106258	WBGene00000372
WBGene00000372	ENSG00000160868	WBGene00000372
WBGene00000372	ENSG00000160870	WBGene00000372
WBGene00000375	ENSG00000019186	WBGene00000375
WBGene00000375	ENSG00000111012	WBGene00000375
WBGene00000375	ENSG00000135929	WBGene00000375
WBGene00000375	ENSG00000140459	WBGene00000375
WBGene00000375	ENSG00000160882	WBGene00000375
WBGene00000375	ENSG00000179142	WBGene00000375
WBGene00000375	ENSG00000186684	WBGene00000375
WBGene00000376	ENSG00000113300	WBGene00000376
WBGene00000376	ENSG00000138767	WBGene00000376
WBGene00000377	ENSG00000120438	WBGene00000377
WBGene00000378	ENSG00000166226	WBGene00000378
WBGene00000379	ENSG00000115484	WBGene00000379
WBGene00000380	ENSG00000150753	WBGene00000380
WBGene00000381	ENSG00000132141	WBGene00000381
WBGene00000381	ENSG00000146731	WBGene00000381
WBGene00000382	ENSG00000094804	WBGene00000382
WBGene00000383	ENSG00000079335	WBGene00000383
WBGene00000383	ENSG00000081377	WBGene00000383
WBGene00000386	ENSG00000101224	WBGene00000386
WBGene00000386	ENSG00000158402	WBGene00000386
WBGene00000386	ENSG00000164045	WBGene00000386
WBGene00000387	ENSG00000101224	WBGene00000387
WBGene00000387	ENSG00000158402	WBGene00000387
WBGene00000387	ENSG00000164045	WBGene00000387
WBGene00000388	ENSG00000101224	WBGene00000388
WBGene00000388	ENSG00000158402	WBGene00000388
WBGene00000388	ENSG00000164045	WBGene00000388
WBGene00000390	ENSG00000070831	WBGene00000390
WBGene00000391	ENSG00000158825	WBGene00000391
WBGene00000392	ENSG00000158825	WBGene00000392
WBGene00000393	ENSG00000170385	WBGene00000393
WBGene00000393	ENSG00000196660	WBGene00000393
WBGene00000396	ENSG00000083857	WBGene00000396
WBGene00000396	ENSG00000086570	WBGene00000396
WBGene00000396	ENSG00000165323	WBGene00000396
WBGene00000396	ENSG00000282908	WBGene00000396
WBGene00000403	ENSG00000139182	WBGene00000403
WBGene00000403	ENSG00000158258	WBGene00000403
WBGene00000403	ENSG00000171603	WBGene00000403
WBGene00000405	ENSG00000170312	WBGene00000405
WBGene00000407	ENSG00000164885	WBGene00000407
WBGene00000408	ENSG00000134058	WBGene00000408
WBGene00000408	ENSG00000277273	WBGene00000408
WBGene00000409	ENSG00000132964	WBGene00000409
WBGene00000409	ENSG00000155111	WBGene00000409
WBGene00000410	ENSG00000136807	WBGene00000410
WBGene00000411	ENSG00000163950	WBGene00000411
WBGene00000414	ENSG00000173894	WBGene00000414
WBGene00000415	ENSG00000145794	WBGene00000415
WBGene00000415	ENSG00000157890	WBGene00000415
WBGene00000415	ENSG00000187800	WBGene00000415
WBGene00000416	ENSG00000099942	WBGene00000416
WBGene00000416	ENSG00000167193	WBGene00000416
WBGene00000417	ENSG00000064012	WBGene00000417
WBGene00000417	ENSG00000106144	WBGene00000417
WBGene00000417	ENSG00000164305	WBGene00000417
WBGene00000417	ENSG00000165806	WBGene00000417
WBGene00000419	ENSG00000088538	WBGene00000419
WBGene00000419	ENSG00000128512	WBGene00000419
WBGene00000419	ENSG00000134516	WBGene00000419
WBGene00000419	ENSG00000147459	WBGene00000419
WBGene00000419	ENSG00000150760	WBGene00000419
WBGene00000420	ENSG00000144366	WBGene00000420
WBGene00000422	ENSG00000158156	WBGene00000422
WBGene00000422	ENSG00000171044	WBGene00000422
WBGene00000422	ENSG00000206579	WBGene00000422
WBGene00000422	ENSG00000260903	WBGene00000422
WBGene00000424	ENSG00000128340	WBGene00000424
WBGene00000424	ENSG00000136238	WBGene00000424
WBGene00000424	ENSG00000169750	WBGene00000424
WBGene00000426	ENSG00000062598	WBGene00000426
WBGene00000428	ENSG00000235608	WBGene00000428
WBGene00000429	ENSG00000135638	WBGene00000429
WBGene00000429	ENSG00000170370	WBGene00000429
WBGene00000430	ENSG00000148704	WBGene00000430
WBGene00000431	ENSG00000184486	WBGene00000431
WBGene00000431	ENSG00000198914	WBGene00000431
WBGene00000432	ENSG00000151650	WBGene00000432
WBGene00000433	ENSG00000134438	WBGene00000433
WBGene00000433	ENSG00000173976	WBGene00000433
WBGene00000435	ENSG00000100987	WBGene00000435
WBGene00000435	ENSG00000119614	WBGene00000435
WBGene00000436	ENSG00000130675	WBGene00000436
WBGene00000437	ENSG00000120094	WBGene00000437
WBGene00000438	ENSG00000107187	WBGene00000438
WBGene00000438	ENSG00000121454	WBGene00000438
WBGene00000439	ENSG00000163064	WBGene00000439
WBGene00000439	ENSG00000164778	WBGene00000439
WBGene00000440	ENSG00000109132	WBGene00000440
WBGene00000440	ENSG00000165462	WBGene00000440
WBGene00000443	ENSG00000105717	WBGene00000443
WBGene00000443	ENSG00000167081	WBGene00000443
WBGene00000443	ENSG00000185630	WBGene00000443
WBGene00000443	ENSG00000204304	WBGene00000443
WBGene00000443	ENSG00000206315	WBGene00000443
WBGene00000443	ENSG00000224952	WBGene00000443
WBGene00000443	ENSG00000225987	WBGene00000443
WBGene00000443	ENSG00000232005	WBGene00000443
WBGene00000443	ENSG00000236353	WBGene00000443
WBGene00000443	ENSG00000237344	WBGene00000443
WBGene00000447	ENSG00000125816	WBGene00000447
WBGene00000447	ENSG00000125820	WBGene00000447
WBGene00000447	ENSG00000136352	WBGene00000447
WBGene00000447	ENSG00000180053	WBGene00000447
WBGene00000448	ENSG00000117707	WBGene00000448
WBGene00000448	ENSG00000119608	WBGene00000448
WBGene00000450	ENSG00000125816	WBGene00000450
WBGene00000450	ENSG00000125820	WBGene00000450
WBGene00000450	ENSG00000136352	WBGene00000450
WBGene00000450	ENSG00000180053	WBGene00000450
WBGene00000451	ENSG00000125492	WBGene00000451
WBGene00000451	ENSG00000143032	WBGene00000451
WBGene00000452	ENSG00000125492	WBGene00000452
WBGene00000452	ENSG00000143032	WBGene00000452
WBGene00000453	ENSG00000126778	WBGene00000453
WBGene00000453	ENSG00000138083	WBGene00000453
WBGene00000453	ENSG00000170577	WBGene00000453
WBGene00000453	ENSG00000184302	WBGene00000453
WBGene00000454	ENSG00000100625	WBGene00000454
WBGene00000454	ENSG00000126778	WBGene00000454
WBGene00000454	ENSG00000170577	WBGene00000454
WBGene00000463	ENSG00000006377	WBGene00000463
WBGene00000463	ENSG00000064195	WBGene00000463
WBGene00000463	ENSG00000105880	WBGene00000463
WBGene00000463	ENSG00000108813	WBGene00000463
WBGene00000463	ENSG00000115844	WBGene00000463
WBGene00000463	ENSG00000144355	WBGene00000463
WBGene00000464	ENSG00000111249	WBGene00000464
WBGene00000464	ENSG00000257923	WBGene00000464
WBGene00000466	ENSG00000111880	WBGene00000466
WBGene00000468	ENSG00000215397	WBGene00000468
WBGene00000468	ENSG00000261678	WBGene00000468
WBGene00000469	ENSG00000105516	WBGene00000469
WBGene00000469	ENSG00000108924	WBGene00000469
WBGene00000469	ENSG00000167074	WBGene00000469
WBGene00000472	ENSG00000006047	WBGene00000472
WBGene00000472	ENSG00000060138	WBGene00000472
WBGene00000472	ENSG00000065978	WBGene00000472
WBGene00000476	ENSG00000116017	WBGene00000476
WBGene00000476	ENSG00000179361	WBGene00000476
WBGene00000476	ENSG00000205143	WBGene00000476
WBGene00000478	ENSG00000111432	WBGene00000478
WBGene00000478	ENSG00000155760	WBGene00000478
WBGene00000478	ENSG00000157240	WBGene00000478
WBGene00000478	ENSG00000163251	WBGene00000478
WBGene00000478	ENSG00000174804	WBGene00000478
WBGene00000478	ENSG00000180340	WBGene00000478
WBGene00000478	ENSG00000188763	WBGene00000478
WBGene00000479	ENSG00000110367	WBGene00000479
WBGene00000480	ENSG00000100226	WBGene00000480
WBGene00000482	ENSG00000111642	WBGene00000482
WBGene00000482	ENSG00000116254	WBGene00000482
WBGene00000482	ENSG00000170004	WBGene00000482
WBGene00000483	ENSG00000103199	WBGene00000483
WBGene00000484	ENSG00000068885	WBGene00000484
WBGene00000484	ENSG00000248710	WBGene00000484
WBGene00000485	ENSG00000187240	WBGene00000485
WBGene00000490	ENSG00000187535	WBGene00000490
WBGene00000491	ENSG00000189350	WBGene00000491
WBGene00000491	ENSG00000198718	WBGene00000491
WBGene00000492	ENSG00000114446	WBGene00000492
WBGene00000493	ENSG00000140323	WBGene00000493
WBGene00000493	ENSG00000154309	WBGene00000493
WBGene00000498	ENSG00000149554	WBGene00000498
WBGene00000499	ENSG00000183765	WBGene00000499
WBGene00000500	ENSG00000103266	WBGene00000500
WBGene00000501	ENSG00000115665	WBGene00000501
WBGene00000502	ENSG00000110172	WBGene00000502
WBGene00000502	ENSG00000147166	WBGene00000502
WBGene00000503	ENSG00000064886	WBGene00000503
WBGene00000503	ENSG00000085465	WBGene00000503
WBGene00000503	ENSG00000133048	WBGene00000503
WBGene00000503	ENSG00000133063	WBGene00000503
WBGene00000503	ENSG00000134216	WBGene00000503
WBGene00000506	ENSG00000112237	WBGene00000506
WBGene00000507	ENSG00000129315	WBGene00000507
WBGene00000508	ENSG00000129315	WBGene00000508
WBGene00000510	ENSG00000100288	WBGene00000510
WBGene00000510	ENSG00000110721	WBGene00000510
WBGene00000515	ENSG00000139163	WBGene00000515
WBGene00000515	ENSG00000143845	WBGene00000515
WBGene00000518	ENSG00000004660	WBGene00000518
WBGene00000518	ENSG00000110931	WBGene00000518
WBGene00000519	ENSG00000196419	WBGene00000519
WBGene00000521	ENSG00000174576	WBGene00000521
WBGene00000527	ENSG00000182871	WBGene00000527
WBGene00000527	ENSG00000204291	WBGene00000527
WBGene00000529	ENSG00000114859	WBGene00000529
WBGene00000529	ENSG00000188037	WBGene00000529
WBGene00000530	ENSG00000114859	WBGene00000530
WBGene00000530	ENSG00000188037	WBGene00000530
WBGene00000531	ENSG00000114859	WBGene00000531
WBGene00000531	ENSG00000188037	WBGene00000531
WBGene00000532	ENSG00000073464	WBGene00000532
WBGene00000532	ENSG00000109572	WBGene00000532
WBGene00000532	ENSG00000171365	WBGene00000532
WBGene00000533	ENSG00000103249	WBGene00000533
WBGene00000536	ENSG00000167186	WBGene00000536
WBGene00000539	ENSG00000188603	WBGene00000539
WBGene00000540	ENSG00000188603	WBGene00000540
WBGene00000541	ENSG00000188603	WBGene00000541
WBGene00000542	ENSG00000014216	WBGene00000542
WBGene00000542	ENSG00000092529	WBGene00000542
WBGene00000542	ENSG00000135773	WBGene00000542
WBGene00000542	ENSG00000137225	WBGene00000542
WBGene00000542	ENSG00000162909	WBGene00000542
WBGene00000542	ENSG00000182472	WBGene00000542
WBGene00000542	ENSG00000203697	WBGene00000542
WBGene00000542	ENSG00000282901	WBGene00000542
WBGene00000543	ENSG00000131375	WBGene00000543
WBGene00000545	ENSG00000014216	WBGene00000545
WBGene00000545	ENSG00000092529	WBGene00000545
WBGene00000545	ENSG00000135773	WBGene00000545
WBGene00000545	ENSG00000137225	WBGene00000545
WBGene00000545	ENSG00000162909	WBGene00000545
WBGene00000545	ENSG00000182472	WBGene00000545
WBGene00000545	ENSG00000203697	WBGene00000545
WBGene00000545	ENSG00000282901	WBGene00000545
WBGene00000546	ENSG00000014216	WBGene00000546
WBGene00000546	ENSG00000092529	WBGene00000546
WBGene00000546	ENSG00000135773	WBGene00000546
WBGene00000546	ENSG00000137225	WBGene00000546
WBGene00000546	ENSG00000162909	WBGene00000546
WBGene00000546	ENSG00000182472	WBGene00000546
WBGene00000546	ENSG00000203697	WBGene00000546
WBGene00000546	ENSG00000282901	WBGene00000546
WBGene00000547	ENSG00000014216	WBGene00000547
WBGene00000547	ENSG00000092529	WBGene00000547
WBGene00000547	ENSG00000135773	WBGene00000547
WBGene00000547	ENSG00000137225	WBGene00000547
WBGene00000547	ENSG00000162909	WBGene00000547
WBGene00000547	ENSG00000182472	WBGene00000547
WBGene00000547	ENSG00000203697	WBGene00000547
WBGene00000547	ENSG00000282901	WBGene00000547
WBGene00000549	ENSG00000074054	WBGene00000549
WBGene00000549	ENSG00000163539	WBGene00000549
WBGene00000550	ENSG00000132361	WBGene00000550
WBGene00000552	ENSG00000143933	WBGene00000552
WBGene00000552	ENSG00000160014	WBGene00000552
WBGene00000552	ENSG00000198668	WBGene00000552
WBGene00000553	ENSG00000130822	WBGene00000553
WBGene00000553	ENSG00000134072	WBGene00000553
WBGene00000553	ENSG00000183049	WBGene00000553
WBGene00000554	ENSG00000188386	WBGene00000554
WBGene00000554	ENSG00000221823	WBGene00000554
WBGene00000561	ENSG00000123307	WBGene00000561
WBGene00000561	ENSG00000162992	WBGene00000561
WBGene00000561	ENSG00000164600	WBGene00000561
WBGene00000561	ENSG00000171532	WBGene00000561
WBGene00000564	ENSG00000149970	WBGene00000564
WBGene00000565	ENSG00000072818	WBGene00000565
WBGene00000565	ENSG00000114331	WBGene00000565
WBGene00000565	ENSG00000131584	WBGene00000565
WBGene00000566	ENSG00000133612	WBGene00000566
WBGene00000566	ENSG00000135439	WBGene00000566
WBGene00000566	ENSG00000157985	WBGene00000566
WBGene00000566	ENSG00000172650	WBGene00000566
WBGene00000566	ENSG00000174194	WBGene00000566
WBGene00000566	ENSG00000188234	WBGene00000566
WBGene00000566	ENSG00000204149	WBGene00000566
WBGene00000566	ENSG00000204169	WBGene00000566
WBGene00000566	ENSG00000204172	WBGene00000566
WBGene00000566	ENSG00000264204	WBGene00000566
WBGene00000567	ENSG00000127022	WBGene00000567
WBGene00000567	ENSG00000153132	WBGene00000567
WBGene00000583	ENSG00000162745	WBGene00000583
WBGene00000584	ENSG00000148826	WBGene00000584
WBGene00000584	ENSG00000163623	WBGene00000584
WBGene00000584	ENSG00000165066	WBGene00000584
WBGene00000585	ENSG00000135775	WBGene00000585
WBGene00000591	ENSG00000164754	WBGene00000591
WBGene00000591	ENSG00000244588	WBGene00000591
WBGene00000761	ENSG00000148459	WBGene00000761
WBGene00000762	ENSG00000173085	WBGene00000762
WBGene00000763	ENSG00000132423	WBGene00000763
WBGene00000764	ENSG00000167113	WBGene00000764
WBGene00000765	ENSG00000110871	WBGene00000765
WBGene00000766	ENSG00000119723	WBGene00000766
WBGene00000767	ENSG00000123815	WBGene00000767
WBGene00000767	ENSG00000163050	WBGene00000767
WBGene00000768	ENSG00000102879	WBGene00000768
WBGene00000768	ENSG00000110880	WBGene00000768
WBGene00000768	ENSG00000167549	WBGene00000768
WBGene00000768	ENSG00000172725	WBGene00000768
WBGene00000770	ENSG00000107864	WBGene00000770
WBGene00000770	ENSG00000113742	WBGene00000770
WBGene00000770	ENSG00000137449	WBGene00000770
WBGene00000770	ENSG00000283087	WBGene00000770
WBGene00000772	ENSG00000214575	WBGene00000772
WBGene00000772	ENSG00000260836	WBGene00000772
WBGene00000772	ENSG00000277445	WBGene00000772
[truncated: 10,856 more rows]

## Sheet: OrthoMCL
CE_WB_CURRENT	HS_ENSG	CE_WB_OLD	CE_WB_COMMENT
[truncated: 12,718 more rows]

[truncated: 1 more sheets: WormBase]
