# Supplementary material
Source: publisher figshare collection journal article supplement (https://gsajournals.figshare.com/articles/dataset/_/6967337)
Supplement: Supplementary file 2 [file 1]

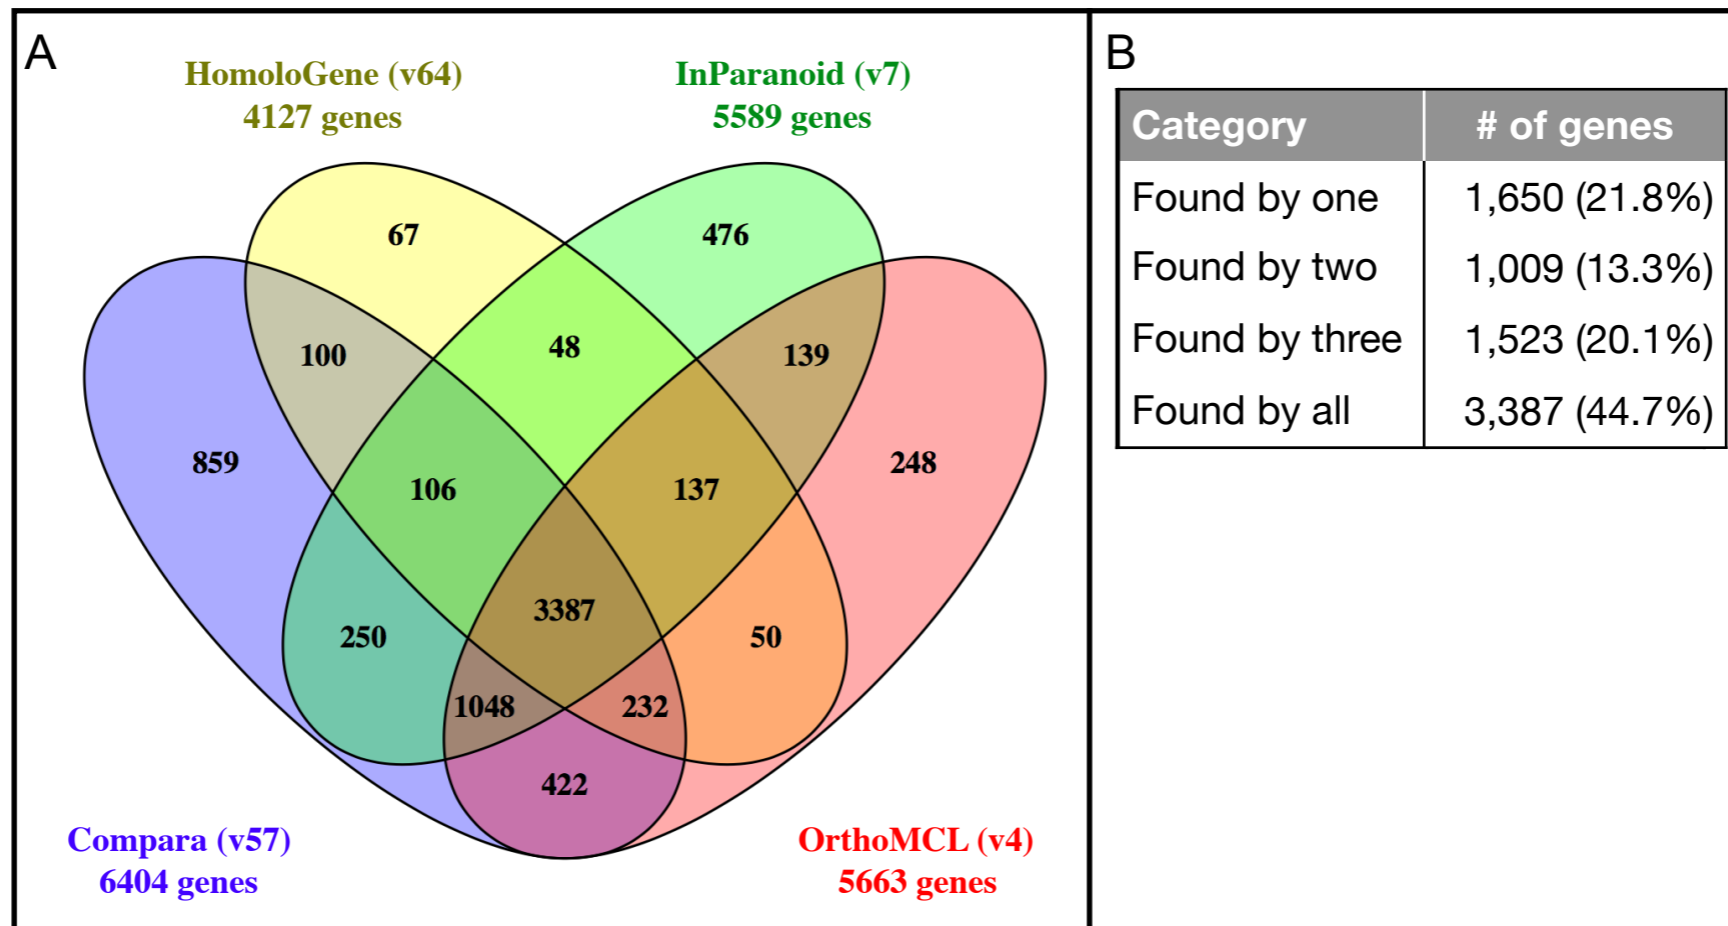

**Supplemental Figure S2: Updated OL1.** We updated OL1 by addressing changes in worm gene structure, classification and nomenclature for the genes present in our original compendium. We then combined results from the corrected OL1 programs. The Venn diagram **(A)** shows overlap in corrected gene content between the four programs, while the table **(B)** gives an overall measure of how many genes were found by one or more programs (regardless of which one(s) found them).
